# Supplementary material for: Transcriptional heterogeneity of tumor-associated high endothelial venules defines inflammatory and stress-metabolic states with distinct prognostic associations
Source: Discov Oncol. 2026 May 8;17:964. doi: 10.1007/s12672-026-05162-2 (PMC13323434; doi:10.1007/s12672-026-05162-2)
Supplement: Supplementary file 3 — Supplementary Material 3. [file 12672_2026_5162_MOESM3_ESM.xlsx]

## Sheet: Table S6
Table S4: Differentially expressed genes of tumor-associated high endothelial venules subclusters
gene	p_val	avg_log2FC	pct.1	pct.2	p_val_adj	cluster
CDKN1A	0	1.225750056	0.971	0.744	0	0
EMP1	3.88E-206	1.166296346	0.959	0.812	2.20E-201	0
ARID5A	6.99E-200	1.20458145	0.637	0.293	3.96E-195	0
MAT2A	8.88E-198	1.218538642	0.711	0.386	5.03E-193	0
RCAN1	1.01E-192	1.246304354	0.821	0.579	5.72E-188	0
IL6	5.71E-188	1.838275247	0.631	0.317	3.23E-183	0
TM4SF1	1.70E-186	0.8962871381	0.986	0.928	9.62E-182	0
NFKBIA	2.17E-186	0.6856069365	0.993	0.939	1.23E-181	0
APOLD1	1.09E-175	1.253880484	0.659	0.339	6.18E-171	0
ATP1A1	9.61E-171	0.7888324308	0.913	0.688	5.44E-166	0
SOD2	4.77E-169	0.9367356822	0.909	0.691	2.70E-164	0
SOX17	7.44E-156	1.478096301	0.641	0.365	4.21E-151	0
ADAMTS9	3.82E-154	1.008275015	0.781	0.531	2.17E-149	0
FOSL1	4.95E-149	1.280462826	0.445	0.175	2.81E-144	0
ADAMTS4	1.68E-141	1.497916753	0.595	0.327	9.53E-137	0
SLC25A25	6.47E-141	0.9339359868	0.61	0.316	3.66E-136	0
PNP	7.77E-141	0.939279658	0.813	0.559	4.40E-136	0
IRF1	8.51E-139	0.6711797611	0.877	0.62	4.82E-134	0
ICAM1	1.68E-137	0.8759764893	0.942	0.786	9.52E-133	0
SERTAD1	2.35E-133	0.6179862628	0.889	0.631	1.33E-128	0
CEBPD	2.81E-133	0.764486815	0.829	0.57	1.59E-128	0
KDM6B	8.19E-132	0.8497219879	0.662	0.37	4.64E-127	0
NFKBID	3.30E-129	1.309592376	0.389	0.15	1.87E-124	0
SDCBP	4.48E-129	0.544140074	0.951	0.823	2.54E-124	0
SOCS3	2.19E-128	0.5633825547	0.97	0.858	1.24E-123	0
TMEM70	1.63E-126	0.9058899657	0.678	0.416	9.25E-122	0
RND1	1.94E-126	0.8895522668	0.767	0.477	1.10E-121	0
CSF3	1.25E-121	1.381280768	0.469	0.224	7.08E-117	0
ADAMTS1	1.77E-121	1.276986653	0.697	0.452	1.00E-116	0
MYC	1.85E-121	0.8955666936	0.702	0.436	1.05E-116	0
ZFP36	1.22E-115	0.6345633907	0.983	0.888	6.93E-111	0
ITPKC	2.76E-115	1.006311317	0.531	0.271	1.56E-110	0
ETS2	5.03E-115	0.568487759	0.947	0.828	2.85E-110	0
SLC2A3	5.66E-115	0.5823412619	0.947	0.788	3.21E-110	0
ARID5B	1.69E-108	0.7665643453	0.803	0.579	9.56E-104	0
ARL5B	3.87E-108	0.940058036	0.546	0.3	2.19E-103	0
ADRB2	2.61E-107	1.128096752	0.425	0.196	1.48E-102	0
CNKSR3	3.18E-107	0.7010595901	0.719	0.456	1.80E-102	0
NAMPT	1.19E-106	0.6689567616	0.883	0.68	6.72E-102	0
TRIB1	1.84E-106	0.7959724471	0.643	0.388	1.04E-101	0
REL	3.71E-103	0.8124696662	0.615	0.363	2.10E-98	0
MIR222HG	2.34E-102	0.8433299827	0.412	0.184	1.33E-97	0
ZC3H12A	2.54E-102	0.7987117303	0.556	0.299	1.44E-97	0
GJA1	3.66E-100	0.997936333	0.788	0.58	2.07E-95	0
NFE2L2	7.86E-100	0.6649405332	0.764	0.53	4.45E-95	0
FAM107A	3.00E-99	0.9425720535	0.481	0.245	1.70E-94	0
GSN	6.67E-99	0.547134609	0.898	0.705	3.78E-94	0
TSC22D1	1.05E-98	0.7145846172	0.873	0.703	5.97E-94	0
NEDD9	1.11E-97	0.5861509456	0.822	0.587	6.26E-93	0
CSRNP1	1.59E-97	0.5543209058	0.765	0.503	8.98E-93	0
STC1	1.60E-96	1.102546537	0.365	0.158	9.07E-92	0
NFKBIZ	3.27E-96	0.5566986638	0.874	0.664	1.85E-91	0
RBKS	1.05E-95	1.346580827	0.358	0.157	5.92E-91	0
YBX3	1.27E-95	0.520797698	0.942	0.816	7.21E-91	0
MIR22HG	1.76E-95	0.7029862465	0.534	0.289	9.97E-91	0
LRRC32	3.12E-94	0.8143974541	0.534	0.29	1.77E-89	0
NOLC1	4.74E-93	0.9322884038	0.468	0.245	2.68E-88	0
AKAP12	1.01E-92	1.039445032	0.369	0.166	5.72E-88	0
SCARB1	1.36E-92	0.9316854374	0.451	0.226	7.68E-88	0
JMJD1C	7.52E-92	0.66972924	0.77	0.552	4.26E-87	0
NR4A2	9.16E-92	0.9745581108	0.589	0.359	5.19E-87	0
UGCG	3.23E-91	0.5658400538	0.828	0.604	1.83E-86	0
INSIG1	4.29E-91	0.6626003771	0.656	0.404	2.43E-86	0
TIFA	1.33E-90	0.7401781306	0.485	0.25	7.55E-86	0
BTG2	6.86E-90	0.5057785912	0.798	0.558	3.89E-85	0
SOCS2	3.90E-89	0.7046988142	0.691	0.45	2.21E-84	0
CCL2	7.02E-89	1.024937632	0.624	0.388	3.97E-84	0
ATF3	9.53E-89	0.5134703418	0.798	0.545	5.40E-84	0
LUCAT1	3.07E-88	1.562714088	0.165	0.039	1.74E-83	0
SLCO4A1	4.71E-88	0.9968439421	0.325	0.136	2.67E-83	0
PHLDA1	9.30E-88	0.6272475673	0.747	0.507	5.27E-83	0
TESC	1.34E-87	0.7510134992	0.57	0.327	7.59E-83	0
THBD	2.72E-84	0.7232018226	0.71	0.487	1.54E-79	0
SERPING1	3.71E-83	0.5159756358	0.789	0.534	2.10E-78	0
MAP3K8	1.22E-82	0.5406153235	0.719	0.472	6.94E-78	0
HLA-DQB1	2.53E-82	0.5063822668	0.837	0.601	1.43E-77	0
SDPR	8.99E-82	0.7728904309	0.548	0.326	5.09E-77	0
CHD1	4.08E-80	0.6306645871	0.644	0.416	2.31E-75	0
NRN1	4.55E-80	0.5656147535	0.722	0.486	2.58E-75	0
LRG1	1.46E-79	0.8894143337	0.342	0.157	8.27E-75	0
DDX21	5.90E-79	0.5614414633	0.764	0.554	3.34E-74	0
MX1	1.83E-78	0.7515591264	0.493	0.278	1.04E-73	0
LMCD1	1.07E-77	0.5252247915	0.838	0.64	6.09E-73	0
ELF1	4.65E-76	0.5736855197	0.713	0.497	2.63E-71	0
CREM	5.16E-76	0.866722668	0.438	0.239	2.92E-71	0
EVA1C	1.25E-73	0.5833428216	0.709	0.485	7.05E-69	0
PCDH19	1.76E-73	0.8696171087	0.286	0.12	9.98E-69	0
TNFAIP3	3.22E-73	0.7684274328	0.723	0.519	1.82E-68	0
NR4A1	3.12E-72	0.5325024632	0.771	0.545	1.77E-67	0
ADM5	3.18E-72	0.7206620826	0.6	0.384	1.80E-67	0
GLTSCR2	2.24E-71	0.6407225112	0.65	0.46	1.27E-66	0
LPCAT4	6.45E-71	0.5696182164	0.584	0.354	3.65E-66	0
TCEB1	8.81E-71	0.7976137335	0.581	0.388	4.99E-66	0
STX11	7.57E-70	0.9893237432	0.226	0.084	4.29E-65	0
GTF2B	1.23E-69	0.6565883317	0.436	0.235	6.97E-65	0
PPP1R10	1.34E-68	0.5916318982	0.582	0.379	7.61E-64	0
TIPARP	2.31E-68	0.5979988084	0.437	0.238	1.31E-63	0
RALGDS	1.27E-67	0.6400708277	0.632	0.429	7.19E-63	0
GNB2L1	1.36E-67	0.5303874313	0.701	0.549	7.69E-63	0
C1QTNF1	1.56E-67	0.6919812608	0.437	0.239	8.81E-63	0
EGLN3	7.09E-67	0.922187935	0.334	0.164	4.01E-62	0
DLC1	1.90E-65	0.5818981826	0.734	0.533	1.07E-60	0
PNRC2	1.96E-65	0.5402798653	0.626	0.419	1.11E-60	0
ICAM4	1.32E-64	0.667068656	0.325	0.154	7.46E-60	0
SOX7	3.43E-63	0.7064935783	0.5	0.305	1.95E-58	0
NDRG1	5.80E-63	0.557835224	0.812	0.627	3.29E-58	0
EGR3	7.58E-63	0.5951124299	0.349	0.172	4.29E-58	0
MT2A	1.38E-62	0.7868020083	0.792	0.633	7.84E-58	0
SEMA4A	1.44E-62	0.7143597586	0.255	0.108	8.16E-58	0
PIM1	3.01E-62	0.832749806	0.286	0.132	1.70E-57	0
CBLB	2.24E-61	0.6541340566	0.487	0.293	1.27E-56	0
AREG	3.25E-61	1.580928748	0.152	0.046	1.84E-56	0
SEMA6A	5.11E-61	0.588093021	0.498	0.293	2.89E-56	0
SERPINB1	5.72E-61	0.5937008263	0.703	0.502	3.24E-56	0
EGR1	6.01E-61	0.5097353365	0.787	0.589	3.40E-56	0
SLC25A44	8.10E-61	0.7870664371	0.274	0.123	4.59E-56	0
CBR3	1.23E-60	0.8018654644	0.288	0.135	6.94E-56	0
LINC-PINT	1.24E-60	0.5874399427	0.524	0.32	7.05E-56	0
DNTTIP2	2.09E-60	0.6417680169	0.482	0.293	1.18E-55	0
ITPR1	2.92E-60	0.6430000711	0.374	0.197	1.65E-55	0
GCH1	7.14E-60	0.9448036219	0.272	0.125	4.04E-55	0
RAB5A	8.05E-60	0.5462226647	0.577	0.372	4.56E-55	0
TSC22D2	8.22E-60	0.5645149869	0.471	0.278	4.65E-55	0
AOC3	3.82E-59	0.7388165065	0.292	0.137	2.16E-54	0
SLC1A5	1.07E-58	0.6122823078	0.456	0.268	6.04E-54	0
INHBB	6.67E-58	0.6009190096	0.393	0.214	3.78E-53	0
GPRC5A	6.81E-58	1.137972399	0.148	0.046	3.86E-53	0
TMTC1	8.37E-58	0.6021169655	0.449	0.261	4.74E-53	0
EFNB2	4.95E-56	0.6181192441	0.457	0.276	2.80E-51	0
SPRY1	1.45E-55	0.5943197202	0.833	0.7	8.18E-51	0
NFATC2	1.70E-55	0.7267301804	0.412	0.24	9.65E-51	0
FNIP2	1.49E-54	0.5102894975	0.521	0.329	8.44E-50	0
C2CD4B	2.29E-54	0.5023765724	0.65	0.456	1.30E-49	0
FLT1	3.93E-54	0.5929229875	0.669	0.481	2.23E-49	0
RNF122	1.12E-53	0.66686987	0.293	0.145	6.37E-49	0
MT1X	1.74E-53	1.000406492	0.393	0.23	9.87E-49	0
FAM13C	1.84E-53	0.6024135983	0.409	0.234	1.04E-48	0
FABP4	3.02E-53	0.5772471658	0.406	0.235	1.71E-48	0
TMEM2	7.48E-53	0.6611118175	0.51	0.327	4.23E-48	0
SEPW1	2.26E-52	0.5196482477	0.677	0.514	1.28E-47	0
PVRL2	2.57E-52	0.5568553964	0.618	0.431	1.45E-47	0
CXCL2	9.12E-52	0.5952900128	0.521	0.34	5.16E-47	0
HOPX	9.26E-52	0.9809416877	0.194	0.078	5.25E-47	0
IFIT3	1.17E-51	0.7466650823	0.322	0.175	6.62E-47	0
SLC10A6	1.23E-51	1.193951512	0.155	0.054	6.97E-47	0
TNXB	1.66E-51	0.5533903157	0.353	0.189	9.38E-47	0
PNPLA2	3.46E-51	0.5006024518	0.585	0.394	1.96E-46	0
B3GNT5	3.76E-51	0.7362716713	0.278	0.138	2.13E-46	0
F8	1.81E-50	0.7423508599	0.258	0.123	1.02E-45	0
ODC1	3.02E-50	0.6302992932	0.437	0.268	1.71E-45	0
CYP1B1	8.77E-50	0.7067100497	0.404	0.242	4.97E-45	0
NOCT	2.19E-49	0.9366467824	0.201	0.085	1.24E-44	0
HIVEP2	1.51E-48	0.8266988685	0.22	0.101	8.55E-44	0
PIK3R3	1.54E-48	0.5494219858	0.532	0.347	8.70E-44	0
KIAA0040	9.83E-48	0.589461618	0.356	0.201	5.56E-43	0
ELOVL7	3.85E-47	0.5076365318	0.441	0.266	2.18E-42	0
MID1	5.52E-47	0.7106173439	0.309	0.167	3.13E-42	0
DEDD	6.08E-47	0.7006901728	0.335	0.187	3.45E-42	0
FGL2	6.58E-47	0.937956355	0.205	0.092	3.73E-42	0
MYO1E	9.98E-47	0.5942991502	0.457	0.288	5.65E-42	0
NFIL3	1.05E-45	0.6701913211	0.276	0.144	5.96E-41	0
RHOU	2.71E-45	0.5020651304	0.371	0.215	1.53E-40	0
PTGER4	4.25E-45	1.244093314	0.127	0.043	2.41E-40	0
NUP98	1.02E-44	0.6544192629	0.327	0.183	5.79E-40	0
PPP1R15B	1.07E-44	0.5855139581	0.421	0.263	6.07E-40	0
LRIG3	3.36E-44	0.6734732245	0.295	0.159	1.91E-39	0
PRNP	3.54E-44	0.6109832721	0.418	0.262	2.00E-39	0
SPSB1	6.96E-44	0.6821916876	0.264	0.136	3.94E-39	0
MLF1	9.52E-44	0.5838518308	0.333	0.187	5.39E-39	0
RGS16	1.75E-43	0.5194938902	0.591	0.413	9.89E-39	0
NOP16	1.77E-43	0.6837849919	0.308	0.173	1.00E-38	0
DOCK11	3.76E-43	0.6509218903	0.208	0.095	2.13E-38	0
UAP1	4.00E-43	0.5555976096	0.351	0.205	2.27E-38	0
MFSD14A	1.47E-42	0.5872344209	0.353	0.206	8.33E-38	0
SLC25A33	7.09E-42	0.6581475515	0.257	0.133	4.01E-37	0
NSUN6	1.28E-41	0.6514108018	0.321	0.183	7.27E-37	0
GPIHBP1	1.50E-41	1.061607053	0.145	0.056	8.51E-37	0
SYBU	1.86E-41	0.7228030351	0.269	0.143	1.05E-36	0
AKAP2	2.90E-41	1.004852944	0.26	0.14	1.64E-36	0
PITPNC1	6.72E-41	0.5166349858	0.436	0.279	3.80E-36	0
ARL13B	7.83E-41	0.5122770706	0.356	0.21	4.43E-36	0
PPRC1	4.34E-40	0.7379327484	0.244	0.127	2.46E-35	0
HELZ2	6.17E-40	0.6776514966	0.241	0.124	3.50E-35	0
TNFRSF10A	1.85E-39	0.6065513819	0.32	0.185	1.05E-34	0
GLA	2.57E-39	0.7108679908	0.304	0.176	1.45E-34	0
POLR1C	3.70E-39	0.6584010494	0.241	0.125	2.09E-34	0
IRF7	6.73E-39	0.5939384801	0.372	0.23	3.81E-34	0
FBXO31	1.48E-38	0.540995041	0.325	0.189	8.36E-34	0
TAF4B	2.82E-38	0.7840832865	0.173	0.078	1.60E-33	0
ALDH1A3	4.24E-38	0.741747268	0.181	0.082	2.40E-33	0
IER3	4.68E-38	0.50056973	0.875	0.774	2.65E-33	0
DENND4A	5.35E-38	0.5883678093	0.294	0.167	3.03E-33	0
SHB	7.88E-38	0.7351668783	0.214	0.108	4.46E-33	0
TP53BP2	3.21E-37	0.5590586541	0.282	0.159	1.82E-32	0
IFIT1	4.56E-37	0.6949268261	0.251	0.137	2.58E-32	0
TRAF4	1.13E-36	0.6781409132	0.252	0.136	6.38E-32	0
LIMCH1	2.22E-36	0.5307213931	0.35	0.212	1.26E-31	0
USP12	4.18E-36	0.5992548475	0.318	0.191	2.37E-31	0
ARAP2	1.43E-35	0.9721732799	0.167	0.077	8.07E-31	0
IGF2	1.71E-35	0.8448345114	0.218	0.113	9.67E-31	0
PPARG	3.84E-35	0.8244248093	0.175	0.082	2.17E-30	0
ZBTB21	7.52E-35	0.6832008337	0.202	0.102	4.26E-30	0
BAALC	8.27E-35	0.5802780354	0.246	0.133	4.69E-30	0
SGMS2	1.58E-34	1.030252576	0.135	0.056	8.96E-30	0
ALDH1A2	3.33E-34	0.9767199739	0.115	0.043	1.88E-29	0
CCDC109B	5.24E-34	0.5634085695	0.353	0.223	2.97E-29	0
PLPP3	5.73E-34	0.5421033727	0.488	0.342	3.25E-29	0
SNAPC1	6.94E-34	0.6032141592	0.28	0.161	3.93E-29	0
RFX2	8.56E-34	0.5653062554	0.245	0.134	4.85E-29	0
RRP12	1.21E-33	0.6202822594	0.254	0.142	6.88E-29	0
PLEKHG2	5.53E-33	0.6759257603	0.207	0.107	3.13E-28	0
CYB5D1	1.39E-32	0.6331258288	0.176	0.086	7.87E-28	0
PAF1	2.24E-32	0.512227759	0.345	0.216	1.27E-27	0
IRAK2	5.87E-32	0.5968365688	0.237	0.132	3.32E-27	0
MTHFD2	6.67E-32	0.6466070294	0.31	0.19	3.78E-27	0
RASL11A	1.71E-31	0.9843833736	0.125	0.052	9.69E-27	0
SELE	3.53E-31	0.6560238119	0.825	0.732	2.00E-26	0
TICAM1	4.38E-31	0.5513122023	0.259	0.149	2.48E-26	0
STC2	6.47E-31	0.6127238968	0.251	0.143	3.66E-26	0
OTUD4	5.29E-30	0.5198539847	0.35	0.226	3.00E-25	0
DYRK3	8.58E-30	0.6798763183	0.16	0.078	4.86E-25	0
SEMA3E	9.88E-30	0.7551321758	0.136	0.061	5.60E-25	0
EGR2	1.54E-29	0.5012090468	0.155	0.073	8.70E-25	0
TMEM185B	3.98E-29	0.6331336498	0.183	0.095	2.25E-24	0
COBLL1	4.85E-29	0.5020767279	0.262	0.154	2.75E-24	0
LEPR	7.30E-29	0.5015124825	0.325	0.207	4.13E-24	0
CDH26	8.39E-29	1.045317348	0.105	0.042	4.75E-24	0
BIRC3	2.57E-28	0.5793963937	0.511	0.381	1.45E-23	0
C21orf59	2.92E-28	0.645241061	0.266	0.162	1.66E-23	0
KITLG	8.45E-28	0.8842585259	0.185	0.099	4.78E-23	0
CXCL3	2.24E-27	0.5540662095	0.264	0.161	1.27E-22	0
RBBP8	2.49E-27	0.5804227027	0.169	0.086	1.41E-22	0
KCNK5	7.43E-27	0.8790521722	0.109	0.046	4.21E-22	0
GALNT15	1.70E-26	0.6602828201	0.137	0.064	9.65E-22	0
UTP4	3.36E-26	0.5530356155	0.19	0.103	1.90E-21	0
KRT7	5.13E-26	0.7459205402	0.137	0.065	2.91E-21	0
PYGO2	5.46E-26	0.7258336651	0.123	0.057	3.09E-21	0
FRMD3	5.55E-26	0.559877753	0.172	0.09	3.14E-21	0
BDKRB2	6.55E-26	0.5276616543	0.227	0.133	3.71E-21	0
GABRA2	9.10E-26	0.7242653202	0.116	0.051	5.15E-21	0
TOR3A	9.33E-26	0.5558713945	0.253	0.154	5.28E-21	0
TGFB3	9.55E-26	0.7382815529	0.104	0.043	5.41E-21	0
ERI1	1.46E-25	0.6287648846	0.17	0.09	8.28E-21	0
MIR155HG	2.23E-25	0.8605709891	0.134	0.064	1.27E-20	0
ACVR1B	2.97E-25	0.6587633193	0.139	0.068	1.68E-20	0
KIAA1683	5.51E-25	0.9179233656	0.112	0.05	3.12E-20	0
C15orf57	1.10E-24	0.6760993348	0.222	0.133	6.22E-20	0
TBC1D8	1.64E-24	0.5581556068	0.158	0.082	9.29E-20	0
MEDAG	2.36E-24	0.8520424296	0.111	0.05	1.33E-19	0
NR1H3	4.29E-24	0.7686169238	0.124	0.059	2.43E-19	0
EMILIN2	6.61E-24	0.7784002312	0.129	0.063	3.74E-19	0
HAUS4	1.29E-23	0.5750850079	0.237	0.145	7.31E-19	0
TLCD2	2.55E-23	0.6450218732	0.109	0.049	1.45E-18	0
PPIF	3.48E-23	0.796934833	0.157	0.084	1.97E-18	0
TNFSF9	4.31E-23	0.6882973105	0.123	0.059	2.44E-18	0
DSG2	4.75E-23	0.6284811678	0.138	0.07	2.69E-18	0
PEX5	4.87E-23	0.7007546261	0.132	0.066	2.76E-18	0
LRRC70	5.30E-23	0.6365229675	0.186	0.105	3.00E-18	0
TACSTD2	5.73E-23	0.6092194795	0.308	0.203	3.25E-18	0
POSTN	1.03E-22	0.5208351177	0.482	0.374	5.81E-18	0
FAM65A	3.67E-22	0.5356449571	0.302	0.203	2.08E-17	0
ANKRD42	4.49E-22	0.5570000658	0.117	0.056	2.54E-17	0
TCEA3	6.72E-22	0.5053075273	0.166	0.092	3.81E-17	0
NR3C2	9.20E-22	0.6307912997	0.128	0.065	5.21E-17	0
SERPINA3.1	1.60E-21	1.134491615	0.114	0.056	9.04E-17	0
RP4-575N6.4	4.18E-21	0.7906821496	0.14	0.074	2.37E-16	0
LMNB1	6.39E-21	0.7237208135	0.142	0.076	3.62E-16	0
SECTM1	1.64E-20	0.5300722939	0.112	0.055	9.30E-16	0
RP11-138A9.1	3.11E-20	0.616943078	0.196	0.119	1.76E-15	0
CCRL2	3.16E-20	0.6421028414	0.166	0.095	1.79E-15	0
CXCL8	9.25E-20	0.5463289824	0.184	0.112	5.24E-15	0
FN3K	1.61E-19	0.7036183015	0.138	0.075	9.13E-15	0
PPARD	1.76E-19	0.5470629162	0.135	0.072	9.97E-15	0
VIM-AS1	3.05E-18	0.566306603	0.123	0.066	1.73E-13	0
ZNF331	1.24E-17	0.5339973288	0.135	0.076	7.04E-13	0
PROSC	3.21E-17	0.5072200639	0.178	0.11	1.82E-12	0
CCDC86	6.05E-17	0.5751893537	0.13	0.073	3.43E-12	0
ZNF460	8.10E-17	0.7251551943	0.108	0.056	4.58E-12	0
SERPINA3	1.48E-16	1.093755445	0.147	0.09	8.37E-12	0
SERPINI1	1.19E-15	0.6261527827	0.113	0.062	6.76E-11	0
DNAJC25-GNG10	1.91E-14	0.5556560752	0.159	0.1	1.08E-09	0
EIF3J-AS1	2.26E-14	0.6543788823	0.121	0.07	1.28E-09	0
DIABLO	5.37E-14	0.5524419444	0.146	0.091	3.04E-09	0
MT1E	5.57E-14	0.8476274001	0.103	0.057	3.15E-09	0
KRBA2	1.40E-13	0.5210799305	0.11	0.062	7.95E-09	0
AC013461.1	1.66E-13	0.5440979379	0.135	0.083	9.38E-09	0
ARG2	6.67E-13	0.6044570914	0.141	0.088	3.78E-08	0
ZNF200	7.38E-13	0.6024433068	0.108	0.062	4.18E-08	0
MB21D1	1.56E-12	0.5236614703	0.122	0.074	8.82E-08	0
GEM	1.94E-12	0.5069752107	0.189	0.129	1.10E-07	0
BRE	1.78E-11	0.5107990155	0.15	0.099	1.01E-06	0
CTC-444N24.11	1.03E-10	0.5428342421	0.125	0.081	5.85E-06	0
G0S2	5.49E-10	0.8774747202	0.291	0.232	3.11E-05	0
FO538757.2	6.89E-07	0.5013767038	0.115	0.082	0.03901865169	0
TXNIP	0	1.752932225	0.91	0.625	0	1
GIMAP7	2.29E-203	1.294848397	0.795	0.563	1.30E-198	1
CLU	2.93E-177	0.9824713715	0.928	0.726	1.66E-172	1
ADIRF	5.78E-162	0.9109363326	0.944	0.786	3.27E-157	1
HLA-DRA	6.13E-121	0.5871418626	0.977	0.888	3.47E-116	1
AQP1	1.32E-116	0.6412132823	0.935	0.817	7.47E-112	1
FOS	1.17E-112	0.5723061673	0.963	0.886	6.64E-108	1
HLA-DPA1	8.38E-98	0.5894728959	0.939	0.837	4.74E-93	1
ID1	1.24E-87	1.040961055	0.728	0.57	7.04E-83	1
HLA-DPB1	1.52E-78	0.5404124929	0.907	0.81	8.60E-74	1
GIMAP4	3.58E-78	0.81230557	0.71	0.573	2.03E-73	1
TSC22D3	1.08E-76	0.8812647345	0.703	0.528	6.12E-72	1
LIFR	9.69E-71	0.8864751127	0.685	0.521	5.49E-66	1
CTSC	3.26E-69	0.7367123232	0.745	0.599	1.85E-64	1
IL33	1.39E-68	0.6664518262	0.778	0.635	7.88E-64	1
TNFSF10	7.86E-67	0.6520545277	0.789	0.691	4.45E-62	1
SNCG	1.66E-63	0.6143821592	0.766	0.646	9.40E-59	1
EMCN	2.17E-58	0.5300740497	0.843	0.751	1.23E-53	1
FBLN2	3.06E-54	1.009201874	0.401	0.24	1.73E-49	1
GSN1	8.26E-54	0.5387920877	0.843	0.74	4.68E-49	1
HLA-DMA	1.94E-53	0.5129990736	0.792	0.67	1.10E-48	1
NRN11	1.86E-51	0.6376108276	0.66	0.527	1.05E-46	1
HLA-DQA1	2.36E-50	0.576530447	0.717	0.556	1.34E-45	1
FAM110D	3.53E-50	1.003190382	0.413	0.264	2.00E-45	1
GPR146	4.99E-48	1.048279749	0.371	0.228	2.83E-43	1
PDK4	1.34E-47	0.7337967442	0.62	0.459	7.59E-43	1
MMRN2	5.15E-44	0.5704599339	0.693	0.602	2.91E-39	1
TPD52L1	1.08E-43	0.766525745	0.54	0.406	6.12E-39	1
ARL4A	3.00E-43	0.5306706174	0.759	0.675	1.70E-38	1
C7	6.11E-43	1.049311062	0.42	0.279	3.46E-38	1
NOSTRIN	3.41E-40	0.6638353244	0.59	0.483	1.93E-35	1
NR2F2	3.89E-40	0.6700366863	0.628	0.529	2.20E-35	1
EDN1	1.00E-38	1.104221812	0.424	0.295	5.69E-34	1
NUPR1	1.59E-38	0.8332222185	0.417	0.286	9.02E-34	1
RBP7	8.70E-38	0.6952748925	0.483	0.345	4.93E-33	1
ARL6IP5	2.78E-37	0.6282301324	0.622	0.531	1.58E-32	1
GIMAP1	5.47E-37	0.7928714784	0.467	0.348	3.10E-32	1
GIMAP8	2.31E-36	0.8722191016	0.381	0.258	1.31E-31	1
IGFBP2	3.89E-36	0.786995183	0.437	0.308	2.20E-31	1
RSPO3	7.68E-36	1.344022481	0.216	0.112	4.35E-31	1
HRCT1	3.37E-35	1.579345897	0.164	0.075	1.91E-30	1
ANKRD29	5.40E-35	0.7979602745	0.418	0.296	3.06E-30	1
RUNX1T1	9.64E-34	1.276626008	0.218	0.118	5.46E-29	1
PLSCR4	1.34E-33	0.7592020913	0.423	0.301	7.57E-29	1
PLAC9	9.52E-32	1.141472347	0.279	0.172	5.39E-27	1
TGFBR3	8.42E-31	0.5778043452	0.616	0.518	4.77E-26	1
PLCXD3	8.72E-31	1.390962052	0.187	0.098	4.94E-26	1
RBM43	9.83E-31	1.289700914	0.16	0.077	5.56E-26	1
NKTR	1.26E-30	0.6011151063	0.572	0.471	7.12E-26	1
SYT15	1.54E-28	0.9706330078	0.281	0.181	8.74E-24	1
LFNG	1.23E-27	1.674569129	0.117	0.05	6.97E-23	1
FABP41	5.21E-26	0.9026020205	0.368	0.262	2.95E-21	1
RASSF9	4.43E-25	1.13563918	0.215	0.13	2.51E-20	1
RASA4	1.11E-23	0.6401778297	0.46	0.368	6.29E-19	1
LYST	2.60E-23	0.7834930606	0.372	0.281	1.47E-18	1
PIK3IP1	2.63E-23	1.058645388	0.177	0.099	1.49E-18	1
CADM3-AS1	3.67E-23	1.074613541	0.236	0.151	2.08E-18	1
HLA-DQA2	3.90E-23	0.807294747	0.324	0.225	2.21E-18	1
LPCAT41	8.89E-23	0.5782520642	0.496	0.403	5.04E-18	1
CYSLTR1	2.31E-22	0.8145596014	0.32	0.229	1.31E-17	1
LIMA1	4.11E-22	0.5101220539	0.559	0.476	2.33E-17	1
MPHOSPH8	2.42E-21	0.5180171635	0.52	0.439	1.37E-16	1
GIMAP2	3.01E-21	0.8221669897	0.257	0.173	1.70E-16	1
ADM51	3.76E-21	0.5343326966	0.522	0.428	2.13E-16	1
MLPH	4.21E-21	0.8418785225	0.2	0.12	2.39E-16	1
TACR1	4.95E-21	0.6408438532	0.369	0.276	2.80E-16	1
METTL7A	1.87E-20	0.8665539975	0.25	0.167	1.06E-15	1
PSIP1	4.13E-20	0.604631867	0.479	0.411	2.34E-15	1
KLF8	5.50E-20	0.9111409894	0.19	0.115	3.12E-15	1
NUAK1	7.49E-20	0.561483596	0.465	0.38	4.24E-15	1
CPXM2	8.94E-20	0.6003194773	0.495	0.422	5.06E-15	1
SCARB11	9.38E-20	0.6817003698	0.366	0.274	5.31E-15	1
LPAR6	1.13E-19	0.5367864114	0.548	0.479	6.42E-15	1
ACACB	1.64E-19	0.8980078508	0.211	0.136	9.27E-15	1
SOX18	2.19E-19	0.6559247655	0.448	0.362	1.24E-14	1
ZFYVE21	2.66E-19	0.6610710063	0.431	0.355	1.51E-14	1
SELENOP	4.67E-19	0.7609899844	0.225	0.145	2.64E-14	1
PGM5	6.04E-19	0.9425710773	0.219	0.143	3.42E-14	1
MMP28	6.43E-19	0.7255012588	0.29	0.207	3.64E-14	1
CCL14	1.73E-18	0.5067404149	0.787	0.748	9.82E-14	1
LTC4S	2.16E-18	0.822772378	0.248	0.169	1.23E-13	1
LRRC1	3.25E-18	0.619518178	0.41	0.328	1.84E-13	1
FRY	3.30E-18	0.5939095624	0.375	0.288	1.87E-13	1
SH3BGRL2	3.70E-18	0.7090008134	0.331	0.253	2.09E-13	1
CCL23	3.56E-17	0.7149455862	0.397	0.313	2.02E-12	1
C1orf115	3.79E-17	0.7628208801	0.295	0.218	2.14E-12	1
CADM3	3.99E-17	0.8397091496	0.215	0.142	2.26E-12	1
CD36	1.55E-16	0.8401840555	0.216	0.143	8.78E-12	1
CPVL	2.87E-16	0.7994667408	0.239	0.168	1.63E-11	1
DSG21	3.58E-16	0.9574760855	0.134	0.077	2.02E-11	1
MMRN1	3.91E-16	0.5249994323	0.463	0.379	2.22E-11	1
FAM13C1	4.21E-16	0.5881530327	0.349	0.268	2.38E-11	1
GIMAP5	4.75E-16	0.6646393399	0.28	0.203	2.69E-11	1
TLL1	1.21E-15	0.6167218336	0.409	0.338	6.88E-11	1
EPHX1	1.41E-15	0.5621504922	0.485	0.425	8.01E-11	1
EAPP	2.77E-15	0.5703234893	0.337	0.263	1.57E-10	1
TIAM1	3.89E-15	0.7987586525	0.211	0.144	2.20E-10	1
TNFRSF1B	4.61E-15	0.5094949924	0.436	0.365	2.61E-10	1
SPTLC2	9.37E-15	0.5764650638	0.439	0.38	5.31E-10	1
DDIT4	1.06E-14	0.7042897073	0.429	0.358	6.03E-10	1
ELN	1.17E-14	0.9355304001	0.184	0.122	6.61E-10	1
HLA-DMB	1.19E-14	0.566268583	0.382	0.312	6.71E-10	1
MRTFB	5.31E-14	0.7681448797	0.194	0.131	3.01E-09	1
PDIA5	5.40E-14	0.5196941399	0.431	0.368	3.06E-09	1
CTTNBP2	5.99E-14	0.8791467397	0.158	0.101	3.39E-09	1
CXCL12	6.07E-14	0.7892726014	0.184	0.123	3.44E-09	1
TMCC3	6.97E-14	0.6638481392	0.31	0.241	3.95E-09	1
PPCS	1.08E-13	0.5508416016	0.391	0.331	6.11E-09	1
TMEM273	1.16E-13	0.7510815401	0.18	0.119	6.58E-09	1
DNASE1L3	1.26E-13	1.01232738	0.198	0.137	7.11E-09	1
CCND3	2.11E-13	0.5056455656	0.422	0.361	1.20E-08	1
AVPR2	2.44E-13	0.8050154773	0.183	0.124	1.38E-08	1
SMAD6	3.05E-13	1.018742182	0.114	0.066	1.73E-08	1
CALHM2	3.07E-13	0.6505096323	0.289	0.222	1.74E-08	1
GFOD1	3.51E-13	0.5452815492	0.33	0.26	1.99E-08	1
ALDH6A1	3.57E-13	1.032112735	0.144	0.092	2.02E-08	1
RNF144B	4.12E-13	1.262653013	0.109	0.063	2.33E-08	1
SLC40A1	4.91E-13	0.7820341309	0.234	0.172	2.78E-08	1
PBX1	5.55E-13	0.6125648004	0.342	0.276	3.14E-08	1
BLOC1S5	5.87E-13	1.067079004	0.116	0.069	3.33E-08	1
HLA-DOA	7.62E-13	0.7518099662	0.209	0.149	4.31E-08	1
HINT2	8.69E-13	0.7012377775	0.274	0.21	4.92E-08	1
TSNAX	9.07E-13	0.7436044494	0.242	0.18	5.14E-08	1
SMIM10	1.06E-12	0.8414296063	0.21	0.151	5.98E-08	1
FTX	1.18E-12	0.8277307686	0.206	0.145	6.69E-08	1
OARD1	1.32E-12	0.5808247872	0.222	0.159	7.46E-08	1
HERC2	2.07E-12	0.5981456357	0.366	0.304	1.17E-07	1
F81	2.38E-12	0.8417263734	0.21	0.15	1.35E-07	1
TSPAN1	1.21E-11	1.035072111	0.12	0.075	6.85E-07	1
RBIS	1.27E-11	0.5420907956	0.15	0.097	7.18E-07	1
CIR1	1.54E-11	0.5863148215	0.313	0.25	8.72E-07	1
NOP53	1.70E-11	0.5128899136	0.352	0.29	9.61E-07	1
CCDC68	2.01E-11	0.68542015	0.262	0.203	1.14E-06	1
TPD52	2.37E-11	0.8075206253	0.189	0.135	1.34E-06	1
CD14	4.01E-11	0.5178453026	0.215	0.157	2.27E-06	1
RESF1	6.46E-11	0.7809079723	0.103	0.061	3.66E-06	1
CIITA	6.85E-11	0.7206730516	0.133	0.086	3.88E-06	1
CLDN11	9.58E-11	0.7414475378	0.196	0.142	5.42E-06	1
MET	1.50E-10	0.5294723956	0.362	0.307	8.47E-06	1
GIPC2	1.56E-10	0.64373395	0.267	0.211	8.82E-06	1
SORBS2	2.27E-10	0.6223690349	0.274	0.219	1.29E-05	1
ENDOD1	2.52E-10	0.5571050067	0.292	0.235	1.43E-05	1
SEPTIN7	3.75E-10	0.5174994774	0.182	0.128	2.12E-05	1
DIPK2B	4.59E-10	0.5134232137	0.155	0.105	2.60E-05	1
HOPX1	4.65E-10	0.902962174	0.149	0.103	2.63E-05	1
CAVIN2	6.06E-10	0.5392215706	0.22	0.162	3.43E-05	1
PTK2B	7.98E-10	0.6710613886	0.161	0.113	4.52E-05	1
NHLRC3	8.65E-10	0.7990389423	0.171	0.123	4.90E-05	1
TBC1D10A	9.02E-10	0.7153017567	0.166	0.118	5.11E-05	1
TMEM88	9.17E-10	0.577979247	0.328	0.275	5.19E-05	1
ARRDC2	1.23E-09	0.5966468411	0.225	0.171	6.95E-05	1
OGA	1.41E-09	0.6134147981	0.167	0.118	7.97E-05	1
ADGRG6	2.54E-09	0.6321713675	0.205	0.154	0.0001439783191	1
GCHFR	2.65E-09	0.8157349951	0.122	0.081	0.0001502888556	1
FLRT2	2.93E-09	0.943844523	0.168	0.122	0.0001656483374	1
XIST	4.21E-09	0.5272261141	0.303	0.246	0.000238473448	1
TMEM245	4.56E-09	0.5376402631	0.302	0.25	0.0002581582041	1
LYRM9	5.47E-09	0.7278905229	0.118	0.078	0.0003099720592	1
TMEM176A	7.31E-09	0.7829994624	0.161	0.116	0.0004141890041	1
EPHA4	7.52E-09	0.5421161206	0.264	0.212	0.0004259319423	1
FRMD31	7.88E-09	0.8896182779	0.147	0.105	0.0004461616113	1
AHNAK2	8.48E-09	0.7558489554	0.163	0.118	0.000480247764	1
ZBTB8A	8.53E-09	0.8562841763	0.127	0.086	0.0004828301269	1
ATXN3	9.21E-09	0.5290782884	0.325	0.279	0.0005216008661	1
ZNF292	1.23E-08	0.505449372	0.31	0.263	0.0006975744252	1
PRXL2A	1.25E-08	0.5109611297	0.162	0.116	0.0007060696195	1
KNOP1	1.47E-08	0.633409501	0.199	0.15	0.0008337370963	1
PUS7L	2.05E-08	0.7749763409	0.177	0.133	0.001162597785	1
AK4	2.51E-08	0.6183071609	0.178	0.133	0.001421085025	1
ST6GALNAC1	2.96E-08	0.797171642	0.12	0.082	0.001675647222	1
ASB8	3.38E-08	0.6351554459	0.168	0.124	0.001916246591	1
EIF4E3	3.67E-08	0.7634375409	0.114	0.076	0.002078944938	1
ZNF395	3.71E-08	0.6606961794	0.133	0.093	0.00210298971	1
SH2D3C	3.74E-08	0.5817209628	0.281	0.233	0.002119348628	1
PCYOX1	4.47E-08	0.6378866083	0.216	0.171	0.002531034909	1
FGF2	4.87E-08	0.8414906101	0.129	0.091	0.002758532021	1
ABCA1	5.18E-08	0.5028275367	0.139	0.098	0.002934429398	1
ABCG2	5.68E-08	0.8924222141	0.186	0.142	0.003218025919	1
ZNF224	5.75E-08	0.611295669	0.13	0.091	0.003255178524	1
KLHL3	6.26E-08	0.5065609978	0.235	0.187	0.003546240134	1
LHFPL6	8.04E-08	0.5043673067	0.205	0.158	0.004555274543	1
SLC25A29	9.42E-08	0.5486129302	0.149	0.108	0.005332302171	1
PLCB4	9.58E-08	0.5118954927	0.307	0.259	0.005425940401	1
NTN4	9.99E-08	0.5021360814	0.199	0.153	0.005656321234	1
NET1	1.13E-07	0.5602189707	0.315	0.272	0.006419585075	1
ESYT1	1.28E-07	0.5147704792	0.261	0.217	0.007249089028	1
RPA2	1.32E-07	0.6280285784	0.201	0.158	0.007469181453	1
THUMPD1	1.51E-07	0.5519771716	0.256	0.211	0.008549983004	1
TMEM140	1.89E-07	0.5598622215	0.209	0.165	0.01068601801	1
MLH3	1.95E-07	0.6583927661	0.138	0.099	0.01105057354	1
KRT71	2.33E-07	0.8191606396	0.114	0.079	0.01318755426	1
RPRD2	2.39E-07	0.6548021832	0.151	0.112	0.01355322962	1
RFC1	2.54E-07	0.5257539307	0.296	0.254	0.01439432721	1
THSD1	3.17E-07	0.6256259758	0.16	0.12	0.01793091375	1
TCEA31	3.50E-07	0.7987313085	0.143	0.106	0.01983799125	1
AFAP1L2	3.56E-07	0.6277654183	0.116	0.081	0.02015178341	1
SHPRH	3.57E-07	0.7659413119	0.153	0.114	0.02021834211	1
SRPX	4.15E-07	0.8238755716	0.165	0.126	0.02352659373	1
SMAD9	4.20E-07	0.5387537733	0.266	0.223	0.02376319938	1
BRD8	4.72E-07	0.5900750078	0.158	0.119	0.02671732883	1
ERAP2	5.41E-07	0.6225210174	0.243	0.202	0.03065905555	1
MTRNR2L8	5.70E-07	0.7494175891	0.187	0.145	0.03225487491	1
BLCAP	5.83E-07	0.5293941792	0.252	0.209	0.03302545515	1
EZH1	7.46E-07	0.6647968838	0.148	0.111	0.04224060904	1
MXI1	7.65E-07	0.5983392661	0.139	0.102	0.0433245732	1
ADAM23	8.39E-07	0.7162804012	0.118	0.084	0.04751324483	1
FOSB	3.06E-103	1.390270165	0.799	0.729	1.73E-98	5
HSP90AA1	7.27E-87	0.8892521978	0.933	0.951	4.12E-82	5
HSPH1	5.53E-86	1.480375221	0.655	0.559	3.13E-81	5
DNAJA1	3.75E-85	0.813560159	0.877	0.874	2.12E-80	5
DNAJB1	1.06E-78	1.342858897	0.765	0.722	6.01E-74	5
PPP1R15A	1.02E-77	0.8100551643	0.869	0.865	5.75E-73	5
NEAT1	1.17E-74	0.8179518769	0.957	0.967	6.64E-70	5
IRF11	1.09E-70	0.9385900445	0.78	0.685	6.17E-66	5
HSPA1A	2.06E-65	1.054666445	0.849	0.806	1.17E-60	5
GADD45B	2.89E-64	1.409394066	0.763	0.719	1.64E-59	5
H3F3B	2.61E-62	0.5261427547	0.977	0.99	1.48E-57	5
CCL21	9.53E-59	1.081279642	0.604	0.434	5.40E-54	5
TNFAIP31	1.16E-51	1.009019653	0.674	0.566	6.55E-47	5
HSP90AB1	6.16E-50	0.5295766119	0.932	0.969	3.49E-45	5
KLF4	2.38E-49	0.9502809894	0.733	0.695	1.35E-44	5
JUND	5.92E-47	1.00360851	0.758	0.739	3.35E-42	5
HSPA1B	8.61E-46	1.062713816	0.728	0.698	4.88E-41	5
JUN	1.55E-45	0.6727580939	0.908	0.917	8.80E-41	5
FTL	5.00E-43	0.5467789098	0.965	0.984	2.83E-38	5
EGR11	1.92E-40	0.9650708649	0.697	0.643	1.09E-35	5
HES1	7.95E-40	1.630588102	0.565	0.498	4.50E-35	5
IER31	7.14E-38	0.6648253148	0.832	0.801	4.04E-33	5
IER5	7.65E-36	1.586470156	0.428	0.337	4.33E-31	5
MALAT1	1.22E-35	0.5048156209	0.995	0.997	6.94E-31	5
UBB	1.72E-35	0.5309594073	0.867	0.938	9.77E-31	5
ATF31	6.41E-34	0.9334635397	0.65	0.62	3.63E-29	5
MCL1	3.88E-32	0.7007981905	0.731	0.788	2.20E-27	5
MAFF	1.32E-31	1.179556083	0.554	0.527	7.49E-27	5
NR4A11	1.03E-30	0.9094665678	0.636	0.612	5.84E-26	5
CCNL1	1.05E-27	0.7000826489	0.719	0.788	5.95E-23	5
SAT1	2.80E-27	0.5655149366	0.871	0.9	1.59E-22	5
SNHG29	4.03E-27	1.019203106	0.289	0.17	2.28E-22	5
MIDN	3.91E-26	0.9543845033	0.589	0.595	2.21E-21	5
KLF10	6.18E-26	1.106044506	0.541	0.534	3.50E-21	5
MT2A1	7.80E-25	0.799823186	0.707	0.679	4.41E-20	5
JUNB	2.35E-24	0.5072768072	0.935	0.961	1.33E-19	5
KDM6B1	2.70E-24	1.014256564	0.499	0.455	1.53E-19	5
BRD2	2.86E-24	0.8487991481	0.622	0.661	1.62E-19	5
SERTAD11	9.61E-24	0.7758948549	0.674	0.719	5.44E-19	5
DNAJB4	2.45E-23	0.9537036528	0.582	0.594	1.39E-18	5
PMAIP1	2.60E-21	1.513891398	0.338	0.265	1.47E-16	5
RSRP1	3.53E-21	0.8286755585	0.609	0.658	2.00E-16	5
HSPE1	6.66E-21	0.8502801884	0.675	0.777	3.77E-16	5
THBD1	2.28E-20	0.8728237041	0.568	0.555	1.29E-15	5
C2CD4B1	3.25E-20	0.8867051318	0.558	0.509	1.84E-15	5
EIF5	3.78E-20	0.7723492266	0.618	0.67	2.14E-15	5
HSPA6	3.98E-20	1.811225901	0.192	0.11	2.25E-15	5
DDIT3	6.31E-20	1.77087873	0.267	0.191	3.57E-15	5
HSPD1	7.93E-20	0.852239012	0.651	0.724	4.49E-15	5
ZFAND2A	4.34E-19	1.702228065	0.3	0.229	2.46E-14	5
ZFAS1	4.56E-19	0.6138471876	0.709	0.79	2.58E-14	5
SOCS31	9.90E-19	0.503931406	0.88	0.896	5.61E-14	5
SLC38A2	1.66E-18	0.786103561	0.631	0.67	9.38E-14	5
BHLHE40	4.81E-18	0.7840920088	0.632	0.673	2.72E-13	5
ICAM41	3.81E-17	1.526397589	0.267	0.196	2.16E-12	5
GAS5	8.52E-17	1.018350447	0.243	0.16	4.82E-12	5
IER2	1.23E-16	0.8232653111	0.722	0.817	6.95E-12	5
SQSTM1	1.07E-15	0.5461414483	0.751	0.827	6.06E-11	5
KLF6	1.57E-15	0.7200094781	0.797	0.877	8.91E-11	5
C11orf96	2.49E-15	1.434247808	0.275	0.21	1.41E-10	5
SNHG5	2.44E-14	1.046264578	0.23	0.157	1.38E-09	5
H2AFZ	5.36E-14	0.5262104136	0.741	0.835	3.03E-09	5
TSC22D11	1.11E-13	0.581758607	0.704	0.767	6.26E-09	5
AC020916.1	1.66E-13	2.011528697	0.159	0.102	9.39E-09	5
EIF4A1	5.36E-13	0.7567527168	0.603	0.657	3.04E-08	5
CD83	5.73E-13	1.7936061	0.143	0.087	3.24E-08	5
KMT2E	1.92E-12	0.7220580268	0.6	0.672	1.09E-07	5
DUSP5	5.91E-12	1.176197763	0.385	0.366	3.35E-07	5
CSRNP11	6.03E-12	0.7451935144	0.548	0.592	3.41E-07	5
CLK1	1.43E-11	0.9311595249	0.482	0.531	8.09E-07	5
SRSF3	1.65E-11	0.7111520156	0.633	0.74	9.36E-07	5
UBE2S	3.18E-11	1.354809838	0.291	0.252	1.80E-06	5
SNHG6	7.68E-11	1.038252155	0.212	0.154	4.35E-06	5
CXCL21	1.46E-10	0.9941218054	0.438	0.389	8.29E-06	5
PALM2-AKAP2	5.42E-10	1.079461247	0.199	0.143	3.07E-05	5
BAG3	2.37E-09	0.7588794439	0.56	0.63	0.0001342181828	5
KLF2	2.70E-09	0.5639921112	0.645	0.698	0.000152838883	5
H2AFX	3.69E-09	1.125754684	0.368	0.366	0.0002090440286	5
DNAJB6	4.13E-09	0.7342650354	0.551	0.652	0.0002340529973	5
CCN2	5.15E-09	0.6491595165	0.175	0.12	0.0002913945874	5
HEXIM1	6.06E-09	1.421745483	0.279	0.251	0.0003429949843	5
RBM12	1.13E-08	0.5490065652	0.084	0.152	0.0006390651764	5
BTG21	2.05E-08	0.6278704813	0.587	0.642	0.001163040327	5
RC3H1	2.91E-08	0.5049882493	0.146	0.238	0.001647606007	5
SAP30	3.12E-08	0.5651972733	0.083	0.148	0.001765828793	5
CKS2	3.15E-08	1.199380425	0.34	0.332	0.001786178342	5
SRSF2	3.46E-08	0.6508177325	0.593	0.714	0.001956943703	5
CEBPD1	5.49E-08	0.5880774016	0.63	0.656	0.003107589023	5
TNFRSF10D	8.61E-08	0.9521433838	0.425	0.45	0.00487663582	5
RBM27	9.37E-08	0.5199426939	0.078	0.139	0.005304357503	5
RRAGC	1.02E-07	0.5304258339	0.148	0.239	0.005763375644	5
TBC1D9	1.17E-07	0.526114362	0.111	0.182	0.006627232849	5
AFMID	1.88E-07	0.5271734514	0.069	0.123	0.01066322696	5
SOX4	2.13E-07	0.8672468727	0.522	0.573	0.01207469535	5
SIN3B	2.44E-07	0.5069340697	0.108	0.176	0.01383335447	5
MAP3K1	2.85E-07	0.5068634092	0.082	0.141	0.01614289548	5
TSC22D21	2.92E-07	1.067029034	0.341	0.338	0.01653266507	5
TRIM69	3.23E-07	0.5053103161	0.107	0.176	0.01828108846	5
HSPB1	3.44E-07	0.667014876	0.848	0.956	0.01950021483	5
AMD1	3.48E-07	1.128878782	0.374	0.382	0.01970172941	5
ATP6V0A1	3.68E-07	0.6585048564	0.077	0.133	0.02081187249	5
CCND2	3.82E-07	0.5326637819	0.128	0.203	0.02164485684	5
TRIM8	4.08E-07	0.5374776745	0.155	0.243	0.02310067223	5
VMP1	4.09E-07	0.7729937417	0.551	0.629	0.02317853326	5
CIC	4.28E-07	0.5043799639	0.101	0.168	0.02425639309	5
NUFIP2	4.68E-07	1.011534728	0.384	0.397	0.02649289319	5
RAB29	5.61E-07	0.6211738294	0.17	0.264	0.03179034573	5
GLRX	5.74E-07	0.5249153198	0.124	0.197	0.03250489042	5
MAP3K81	6.45E-07	0.7032303407	0.501	0.559	0.03652345846	5
BRAF	6.62E-07	0.5454088893	0.104	0.171	0.03748960309	5
PLCG2	8.78E-07	0.6324969106	0.152	0.234	0.0497471819	5
MGRN1	8.83E-07	0.5103972813	0.098	0.159	0.04999314779	5
COL6A2	0	3.174873667	0.704	0.183	0	6
COL4A1	0	3.131221509	0.952	0.495	0	6
COL4A2	0	2.775773228	0.968	0.571	0	6
LGALS1	0	2.930554237	0.871	0.48	0	6
HSPG2	0	1.405776826	0.978	0.85	0	6
SPARC	0	1.320395992	0.981	0.914	0	6
THBS1	7.10E-307	1.9869511	0.835	0.379	4.02E-302	6
C4orf48	2.38E-286	2.34338546	0.657	0.211	1.35E-281	6
THY1	1.70E-285	2.653470982	0.515	0.116	9.62E-281	6
COL15A1	5.65E-285	1.489814923	0.958	0.761	3.20E-280	6
LAMA4	1.23E-252	2.055310663	0.69	0.274	6.95E-248	6
LAMP3	1.35E-252	2.694969381	0.411	0.076	7.67E-248	6
S100A3	1.62E-250	3.392631986	0.34	0.049	9.17E-246	6
VWA1	2.37E-249	1.741151571	0.862	0.504	1.34E-244	6
RGCC	3.05E-237	1.942507681	0.685	0.261	1.72E-232	6
P2RY6	1.56E-236	2.840455233	0.397	0.078	8.82E-232	6
COTL1	1.11E-232	1.506177505	0.877	0.624	6.28E-228	6
DYSF	1.20E-230	2.38922161	0.525	0.154	6.80E-226	6
MAP1B	6.92E-228	2.22244669	0.536	0.16	3.92E-223	6
CDH13	1.78E-227	2.394493995	0.484	0.126	1.01E-222	6
S100A6	3.27E-225	1.131931439	0.999	0.989	1.85E-220	6
PFN1	2.36E-222	1.0946073	0.963	0.89	1.34E-217	6
SERF2	1.91E-218	0.8051971035	0.992	0.967	1.08E-213	6
COL18A1	5.11E-217	1.557109397	0.842	0.499	2.90E-212	6
FSTL1	4.21E-214	1.571231393	0.835	0.546	2.38E-209	6
MMP2	6.66E-211	2.137390248	0.483	0.129	3.77E-206	6
TMSB10	1.07E-200	0.6875022038	1	0.999	6.07E-196	6
S100A11	3.45E-191	0.9028631167	0.977	0.906	1.96E-186	6
PXDN	1.21E-185	1.960999832	0.656	0.313	6.87E-181	6
SERPINE1	2.77E-185	1.271654798	0.783	0.386	1.57E-180	6
MCAM	1.19E-180	1.611361004	0.737	0.423	6.75E-176	6
LAMC1	4.04E-176	1.576922967	0.75	0.444	2.29E-171	6
COLGALT1	8.10E-176	2.255726394	0.448	0.137	4.59E-171	6
APLN	1.60E-171	4.237591197	0.182	0.016	9.07E-167	6
CD276	6.24E-163	2.675976809	0.277	0.051	3.53E-158	6
FBLIM1	1.07E-162	2.702544187	0.244	0.038	6.04E-158	6
SH3BGRL3	1.88E-162	0.8524359223	0.962	0.887	1.07E-157	6
MYL6	7.26E-162	0.6704312333	0.988	0.974	4.11E-157	6
ANGPTL2	9.33E-159	2.255151197	0.437	0.142	5.28E-154	6
CFL1	1.40E-154	0.678145861	0.966	0.934	7.95E-150	6
PRSS23	4.21E-150	0.9579431239	0.928	0.743	2.38E-145	6
COL6A1	8.63E-149	2.018437023	0.489	0.186	4.89E-144	6
CYR61	9.20E-149	1.63118804	0.748	0.464	5.21E-144	6
CYBA	4.54E-148	1.720030163	0.589	0.264	2.57E-143	6
ITIH5	5.03E-147	2.74995022	0.296	0.068	2.85E-142	6
IGFBP7	5.16E-147	0.7712038928	0.999	0.979	2.92E-142	6
CTHRC1	5.95E-147	1.562193659	0.766	0.488	3.37E-142	6
LAMB1	7.88E-146	1.457557994	0.688	0.383	4.46E-141	6
VWF	5.54E-144	0.8858749136	0.981	0.914	3.14E-139	6
CALD1	1.92E-143	1.204479869	0.832	0.599	1.09E-138	6
RGS3	2.10E-143	1.970904048	0.508	0.208	1.19E-138	6
MYO1B	4.31E-143	2.015091011	0.424	0.142	2.44E-138	6
MGP	1.09E-142	1.091609131	0.961	0.851	6.15E-138	6
CSTB	8.48E-138	1.020045554	0.869	0.697	4.80E-133	6
MLEC	4.39E-131	1.609940324	0.537	0.24	2.49E-126	6
RASGRP3	5.15E-130	1.716316647	0.478	0.189	2.92E-125	6
MMP9	5.23E-130	3.371950696	0.157	0.017	2.96E-125	6
FKBP1A	8.39E-130	0.6044789605	0.987	0.942	4.75E-125	6
SVIL	1.42E-129	1.425470143	0.635	0.335	8.07E-125	6
C16orf74	1.56E-129	4.066615302	0.117	0.006	8.82E-125	6
HECW2	1.69E-129	2.120924308	0.288	0.07	9.55E-125	6
SEC61G	4.10E-128	1.218616612	0.82	0.622	2.32E-123	6
GADD45GIP1	5.71E-127	1.155660545	0.771	0.52	3.23E-122	6
KIAA1147	6.95E-125	2.604229059	0.229	0.045	3.93E-120	6
CCND1	3.02E-123	2.012088218	0.37	0.121	1.71E-118	6
ACOT7	6.75E-123	2.024474171	0.304	0.082	3.82E-118	6
AP2S1	2.77E-121	1.002891565	0.837	0.646	1.57E-116	6
NDUFB2	5.18E-121	0.9390924457	0.856	0.671	2.93E-116	6
CD81	1.52E-119	1.047529194	0.856	0.635	8.63E-115	6
IGFBP3	6.93E-119	2.893697486	0.306	0.087	3.92E-114	6
HTRA1	7.02E-119	1.255473216	0.699	0.422	3.98E-114	6
MYL12B	8.68E-116	0.6206697128	0.963	0.919	4.91E-111	6
HSP90B1	6.17E-115	0.8103021927	0.914	0.786	3.49E-110	6
F2RL3	7.48E-114	1.920310376	0.307	0.088	4.23E-109	6
RAI14	2.50E-111	0.996727273	0.789	0.551	1.41E-106	6
DBI	8.18E-111	0.9812580357	0.822	0.623	4.63E-106	6
ATOX1	6.17E-110	0.9534331925	0.836	0.643	3.49E-105	6
C1orf54	2.33E-109	1.247179082	0.658	0.387	1.32E-104	6
A2M	2.52E-109	0.7338045364	0.97	0.882	1.43E-104	6
TNFRSF4	3.68E-109	2.299173059	0.251	0.062	2.08E-104	6
CRIP1	7.73E-108	1.744960678	0.494	0.222	4.38E-103	6
ITGA5	8.37E-108	1.052783178	0.785	0.572	4.74E-103	6
POMP	9.18E-105	0.9144190424	0.882	0.745	5.20E-100	6
ENO1	1.18E-104	0.7884203364	0.88	0.729	6.69E-100	6
ACTB	8.58E-104	0.6242136239	0.997	0.981	4.86E-99	6
RAB13	2.55E-103	0.7130920102	0.911	0.804	1.45E-98	6
ENG	1.15E-102	0.6501145685	0.972	0.908	6.53E-98	6
MIR4435-2HG	9.84E-102	1.831450098	0.372	0.14	5.57E-97	6
ANXA2	9.81E-101	0.5987935941	0.97	0.933	5.55E-96	6
DPYSL3	8.46E-100	1.259520326	0.606	0.342	4.79E-95	6
CALR	1.19E-99	0.7601419935	0.9	0.781	6.73E-95	6
ITGB1	1.30E-99	0.8202115006	0.879	0.746	7.36E-95	6
FADS2	7.99E-98	2.973659606	0.147	0.022	4.52E-93	6
ITGAV	8.08E-97	1.282821416	0.597	0.332	4.57E-92	6
RCAN2	2.56E-96	2.649128863	0.155	0.025	1.45E-91	6
RNF145	2.48E-95	1.17558582	0.662	0.41	1.41E-90	6
RAB31	4.10E-95	1.851089995	0.265	0.077	2.32E-90	6
COL27A1	4.26E-95	3.33411016	0.113	0.012	2.41E-90	6
MSN	1.10E-94	0.7475761146	0.883	0.752	6.21E-90	6
SEC61B	1.78E-94	0.7221647344	0.868	0.749	1.01E-89	6
UQCR11	1.84E-94	0.8622279564	0.824	0.655	1.04E-89	6
CD63	4.88E-93	0.5943713123	0.967	0.94	2.77E-88	6
INSR	3.44E-92	1.417051772	0.484	0.232	1.95E-87	6
PLAU	9.06E-92	2.192808938	0.246	0.07	5.13E-87	6
NDUFS5	6.83E-91	0.7651635297	0.856	0.693	3.87E-86	6
ZYX	9.36E-91	1.177997996	0.684	0.46	5.30E-86	6
PDGFB	5.11E-90	1.684308746	0.385	0.16	2.90E-85	6
EIF4EBP1	1.92E-89	1.555334102	0.42	0.187	1.09E-84	6
PGF	1.27E-88	1.670007702	0.33	0.119	7.17E-84	6
NRCAM	1.77E-88	3.008424257	0.135	0.021	1.00E-83	6
QPCT	2.99E-87	1.772176779	0.289	0.096	1.69E-82	6
ADAMTS7	9.11E-87	2.502735471	0.195	0.047	5.16E-82	6
IL32	1.46E-86	1.29359731	0.535	0.282	8.25E-82	6
EXOC3L1	1.66E-86	2.545710446	0.138	0.022	9.40E-82	6
RHOB	1.75E-86	0.9639297793	0.83	0.649	9.90E-82	6
PRCP	2.20E-86	0.6496772189	0.945	0.851	1.24E-81	6
UBL5	2.40E-86	0.7308418025	0.879	0.753	1.36E-81	6
CD93	2.65E-86	0.723023046	0.9	0.783	1.50E-81	6
NDUFS6	3.00E-86	0.9915925369	0.717	0.49	1.70E-81	6
SQLE	9.17E-86	1.701713656	0.336	0.127	5.19E-81	6
AEBP1	3.58E-85	1.612424587	0.326	0.12	2.03E-80	6
POLR2L	4.52E-85	0.7796072303	0.905	0.789	2.56E-80	6
FLNA	7.15E-85	0.9510598087	0.748	0.554	4.05E-80	6
PMEPA1	8.90E-85	1.638666177	0.365	0.151	5.04E-80	6
SYNPO	1.64E-84	1.270635453	0.504	0.265	9.31E-80	6
TM4SF18	7.95E-84	1.138674262	0.599	0.355	4.50E-79	6
ATP1B3	1.64E-83	0.8997344971	0.775	0.582	9.28E-79	6
FAM198B	1.27E-81	1.068209072	0.661	0.43	7.22E-77	6
ENTPD1	3.21E-81	0.9649287778	0.71	0.48	1.82E-76	6
SH3TC1	8.55E-81	1.604852742	0.399	0.174	4.84E-76	6
FNDC4	6.51E-80	1.761512543	0.263	0.085	3.68E-75	6
AES	6.93E-80	1.233559117	0.542	0.3	3.92E-75	6
BGN	8.65E-80	1.489752148	0.322	0.121	4.90E-75	6
PPIB	9.72E-80	0.6694365613	0.905	0.824	5.50E-75	6
UQCC2	2.44E-79	1.44433209	0.403	0.183	1.38E-74	6
GRN	8.41E-79	0.7022876811	0.86	0.715	4.76E-74	6
RABAC1	9.16E-79	0.6441704215	0.888	0.761	5.19E-74	6
CALM1	1.51E-78	0.6128093096	0.942	0.899	8.53E-74	6
ACVRL1	2.67E-78	1.047014785	0.659	0.431	1.51E-73	6
RFLNB	4.35E-78	2.590633223	0.191	0.05	2.47E-73	6
CMTM7	6.40E-78	1.680043482	0.259	0.084	3.62E-73	6
TGM2	8.47E-78	0.9061139056	0.656	0.41	4.80E-73	6
CHD3	8.50E-78	1.516431622	0.327	0.127	4.81E-73	6
CALU	1.06E-77	1.078258204	0.607	0.384	5.98E-73	6
PLOD1	4.26E-77	1.388550353	0.433	0.211	2.41E-72	6
EPS8L1	9.25E-77	2.163448082	0.196	0.052	5.24E-72	6
GNAI2	1.06E-76	0.6757159142	0.873	0.747	5.98E-72	6
NDUFA4	2.42E-76	0.5734922277	0.897	0.809	1.37E-71	6
SERPINH1	5.64E-76	0.7378510696	0.839	0.705	3.19E-71	6
COL5A2	5.96E-76	2.001910769	0.208	0.059	3.37E-71	6
SEMA3F	6.28E-76	1.594129402	0.36	0.154	3.56E-71	6
ARHGDIB	5.13E-75	0.768802201	0.82	0.656	2.90E-70	6
APLNR	1.78E-74	1.229635251	0.568	0.341	1.01E-69	6
EXT1	1.97E-74	1.648298682	0.293	0.11	1.12E-69	6
CAVIN3	2.74E-73	1.914156051	0.38	0.19	1.55E-68	6
ADAMTS6	6.95E-73	1.907741132	0.242	0.08	3.94E-68	6
UQCRQ	3.35E-72	0.7684909659	0.801	0.634	1.90E-67	6
APCDD1	4.89E-72	2.319578672	0.193	0.054	2.77E-67	6
NDUFA11	6.23E-72	0.9613028717	0.65	0.42	3.53E-67	6
MAP1LC3A	6.69E-72	1.093148774	0.638	0.433	3.79E-67	6
COX6C	6.81E-72	0.5922365657	0.897	0.804	3.86E-67	6
PSMA7	2.12E-70	0.5872918964	0.881	0.805	1.20E-65	6
PPIA	2.24E-70	0.6068134661	0.961	0.943	1.27E-65	6
CRIP2	3.38E-70	0.5497032395	0.946	0.883	1.91E-65	6
MARCKS	4.14E-70	0.837903826	0.738	0.527	2.34E-65	6
PSME2	7.71E-70	0.8022319585	0.776	0.61	4.36E-65	6
LBH	8.47E-70	1.240981073	0.475	0.254	4.80E-65	6
GPR4	2.19E-69	1.349766572	0.396	0.189	1.24E-64	6
FSCN1	7.89E-69	0.9565279115	0.632	0.432	4.47E-64	6
OST4	1.62E-68	0.5955362145	0.885	0.797	9.16E-64	6
MRPL41	1.69E-68	0.981906694	0.632	0.42	9.57E-64	6
MMP14	2.67E-68	1.392525997	0.387	0.183	1.51E-63	6
RHOC	5.15E-68	0.7051909497	0.815	0.666	2.92E-63	6
LYVE1	7.15E-68	1.749974977	0.186	0.051	4.05E-63	6
P4HB	7.24E-68	0.7552500153	0.775	0.615	4.10E-63	6
SRM	8.72E-68	1.221395895	0.424	0.215	4.94E-63	6
CD99	1.19E-67	0.5992748555	0.911	0.871	6.76E-63	6
HSPA5	9.83E-67	0.6623753456	0.821	0.657	5.57E-62	6
TXNDC17	1.00E-66	0.9315541736	0.652	0.453	5.67E-62	6
COX6B1	1.05E-66	0.666635016	0.86	0.72	5.97E-62	6
SSR4	1.77E-66	0.5562307934	0.878	0.773	1.00E-61	6
ICAM2	1.81E-66	0.9260692948	0.702	0.512	1.03E-61	6
MINOS1	2.29E-66	0.9776669937	0.579	0.354	1.30E-61	6
FADS1	2.53E-66	1.956441368	0.195	0.058	1.43E-61	6
SAMD14	4.36E-66	2.182743434	0.161	0.041	2.47E-61	6
NDUFC2	1.46E-65	0.9240996323	0.594	0.368	8.26E-61	6
NDUFA13	2.43E-65	0.9183009402	0.665	0.444	1.38E-60	6
TPM4	2.76E-65	0.5939016858	0.918	0.827	1.56E-60	6
IL2RG	3.11E-65	1.832594559	0.231	0.079	1.76E-60	6
FAP	3.73E-65	1.769422053	0.206	0.064	2.11E-60	6
NDUFB11	4.40E-65	0.7194981055	0.778	0.614	2.49E-60	6
CLTC	1.15E-64	1.029292798	0.565	0.349	6.50E-60	6
PHLDB1	1.69E-64	1.576586343	0.26	0.096	9.55E-60	6
ADGRF5	1.86E-64	1.261967789	0.491	0.28	1.05E-59	6
PKM	6.97E-64	0.6566749297	0.839	0.72	3.95E-59	6
FAM167B	1.25E-63	0.9710405413	0.649	0.449	7.08E-59	6
RNF7	1.99E-63	0.8204405251	0.706	0.538	1.13E-58	6
TIMM8B	2.10E-63	0.9870030025	0.574	0.358	1.19E-58	6
ARPC2	3.23E-63	0.6289669052	0.853	0.754	1.83E-58	6
CHCHD10	6.33E-63	1.471919541	0.323	0.141	3.59E-58	6
LAPTM5	6.55E-63	1.423485868	0.173	0.047	3.71E-58	6
TAX1BP3	6.72E-63	1.049329205	0.519	0.307	3.80E-58	6
TNK2	6.90E-63	1.865005459	0.184	0.053	3.91E-58	6
S100A13	7.46E-63	0.6102288707	0.9	0.801	4.23E-58	6
FDPS	2.97E-62	0.9473548995	0.625	0.428	1.68E-57	6
TTYH3	3.70E-62	1.554984462	0.301	0.129	2.10E-57	6
MYO10	6.66E-62	1.177173526	0.401	0.201	3.77E-57	6
TBC1D1	8.40E-62	1.106048199	0.417	0.215	4.76E-57	6
TSPAN15	2.26E-61	1.33825456	0.405	0.213	1.28E-56	6
MRPL33	6.70E-61	0.746578393	0.77	0.595	3.80E-56	6
PDLIM4	7.41E-61	0.9859102522	0.548	0.335	4.19E-56	6
PKIG	8.52E-61	0.889858647	0.609	0.401	4.83E-56	6
ALPK3	9.30E-61	1.815835389	0.135	0.031	5.26E-56	6
2-9월	9.90E-61	0.8103999762	0.647	0.446	5.61E-56	6
NDUFA1	3.20E-60	0.6916741739	0.785	0.613	1.81E-55	6
ROMO1	5.05E-60	0.8535973284	0.719	0.531	2.86E-55	6
FN1	7.74E-60	1.147735799	0.374	0.178	4.38E-55	6
PARK7	9.00E-60	0.6004322397	0.818	0.696	5.10E-55	6
NME1	1.57E-59	1.096650016	0.477	0.274	8.89E-55	6
NEDD8	2.27E-58	0.6088523126	0.833	0.704	1.28E-53	6
FAM129B	2.80E-58	1.193886458	0.422	0.225	1.59E-53	6
GALNT1	3.16E-58	1.125986331	0.427	0.229	1.79E-53	6
RALA	5.66E-58	1.062591098	0.528	0.329	3.20E-53	6
JUP	7.16E-58	1.389643718	0.299	0.129	4.05E-53	6
NME4	1.38E-57	1.051753923	0.484	0.283	7.79E-53	6
PRDX5	1.72E-57	0.6872160921	0.775	0.637	9.74E-53	6
PCDH17	2.39E-57	0.9110713221	0.624	0.423	1.35E-52	6
YWHAH	3.71E-57	0.8005670797	0.709	0.54	2.10E-52	6
HYAL2	4.49E-57	0.7231854335	0.789	0.633	2.54E-52	6
OAF	5.24E-57	1.322146393	0.353	0.172	2.97E-52	6
COX7B	1.25E-56	0.713981297	0.748	0.593	7.09E-52	6
FAM213B	1.30E-56	1.54768989	0.26	0.104	7.37E-52	6
ECE1	1.72E-56	0.6681165743	0.786	0.63	9.75E-52	6
LAPTM4B	1.77E-56	0.9706690072	0.577	0.382	1.00E-51	6
ACTN4	1.98E-56	0.7098004523	0.775	0.639	1.12E-51	6
LTBP1	2.61E-56	1.537722829	0.256	0.103	1.48E-51	6
SNRPG	2.61E-56	0.6914856945	0.777	0.619	1.48E-51	6
RCN3	3.63E-56	2.205742801	0.131	0.032	2.06E-51	6
TMEM258	5.45E-56	0.666783197	0.818	0.666	3.09E-51	6
TMED9	7.07E-56	0.8006151928	0.69	0.522	4.00E-51	6
SDF2L1	1.32E-55	1.086097372	0.447	0.25	7.47E-51	6
DAPK3	1.46E-55	1.082258083	0.425	0.231	8.28E-51	6
ETS1	1.88E-55	0.8510280375	0.655	0.457	1.07E-50	6
PSMB3	1.91E-55	0.7003838408	0.766	0.615	1.08E-50	6
SFRP1	3.97E-55	2.023899101	0.165	0.049	2.25E-50	6
MYDGF	4.41E-55	0.8480671496	0.65	0.491	2.50E-50	6
SELENOM	6.98E-55	1.451522432	0.419	0.25	3.95E-50	6
MRPL52	7.88E-55	0.9671837897	0.583	0.39	4.46E-50	6
COX7A2	8.98E-55	0.6005862454	0.844	0.754	5.09E-50	6
LDHB	1.15E-54	0.7186874157	0.719	0.561	6.49E-50	6
CARD16	1.49E-54	0.9148782132	0.6	0.405	8.47E-50	6
PGAM1	1.88E-54	0.7619622177	0.683	0.531	1.06E-49	6
MBOAT7	6.89E-54	1.331240831	0.315	0.146	3.90E-49	6
STAB1	8.32E-54	0.9368715139	0.588	0.39	4.71E-49	6
ARPC3	1.61E-53	0.5394428885	0.846	0.764	9.13E-49	6
TP53I11	1.62E-53	1.688970144	0.199	0.069	9.18E-49	6
TIMM13	1.67E-53	0.9157967203	0.604	0.426	9.45E-49	6
AURKAIP1	2.54E-53	0.758091344	0.676	0.49	1.44E-48	6
GGH	8.62E-53	1.956041192	0.171	0.054	4.88E-48	6
NOTCH4	9.44E-53	1.2542166	0.363	0.186	5.35E-48	6
SMIM37	1.05E-52	1.707735489	0.182	0.06	5.97E-48	6
ATP5F1E	1.41E-52	1.228185511	0.49	0.356	7.98E-48	6
FAM101B	2.85E-52	1.70504454	0.188	0.064	1.62E-47	6
PCDH12	3.77E-52	1.631680486	0.186	0.063	2.13E-47	6
FMNL3	4.34E-52	1.323454906	0.281	0.123	2.46E-47	6
NDST1	5.42E-52	1.085169563	0.458	0.273	3.07E-47	6
COL13A1	1.05E-51	1.991312747	0.136	0.036	5.93E-47	6
PRDX6	1.12E-51	0.6234225827	0.78	0.679	6.32E-47	6
PDIA4	1.53E-51	0.924236619	0.552	0.361	8.69E-47	6
PLEKHO1	2.12E-51	1.073886557	0.452	0.262	1.20E-46	6
ZNF428	3.02E-51	0.9032546605	0.551	0.361	1.71E-46	6
PRELID1	5.05E-51	0.6672188539	0.722	0.571	2.86E-46	6
DOCK6	9.09E-51	1.033722768	0.368	0.187	5.15E-46	6
RBP5	1.05E-50	1.136908204	0.468	0.281	5.95E-46	6
RBP1	1.12E-50	1.314291399	0.204	0.074	6.36E-46	6
A1BG	2.43E-50	1.801072603	0.167	0.053	1.37E-45	6
CCDC28B	2.53E-50	1.465326645	0.217	0.083	1.43E-45	6
BSG	5.65E-50	0.569947976	0.815	0.674	3.20E-45	6
IDH2	6.21E-50	1.351071572	0.256	0.109	3.52E-45	6
S100A4	6.31E-50	1.872710759	0.286	0.131	3.57E-45	6
S100A16	7.44E-50	0.5485414792	0.841	0.736	4.21E-45	6
TRIM47	7.80E-50	0.9114152775	0.491	0.294	4.42E-45	6
CASC15	1.47E-49	1.518826169	0.246	0.104	8.31E-45	6
EIF5A	1.70E-49	0.6934728979	0.74	0.586	9.60E-45	6
CYTOR1	2.38E-49	1.835332338	0.207	0.08	1.35E-44	6
ANO9	8.95E-49	2.592010087	0.11	0.026	5.07E-44	6
TP53I3	9.21E-49	1.140868353	0.379	0.206	5.21E-44	6
SCAND1	9.84E-49	0.7388860423	0.67	0.504	5.57E-44	6
NOX4	1.29E-48	1.400312744	0.215	0.082	7.30E-44	6
MYL9	1.69E-48	1.193985218	0.516	0.341	9.57E-44	6
CRIM1	2.34E-48	0.8064120601	0.717	0.56	1.33E-43	6
CDYL2	2.50E-48	1.887235239	0.126	0.033	1.42E-43	6
HSBP1	5.65E-48	0.6349490104	0.745	0.602	3.20E-43	6
CA2	1.02E-47	1.366886807	0.171	0.057	5.78E-43	6
SUB1	1.14E-47	0.5134973104	0.844	0.749	6.46E-43	6
TMED3	1.15E-47	1.098470898	0.358	0.185	6.52E-43	6
PLCB1	3.14E-47	1.035775815	0.435	0.255	1.78E-42	6
CTSB	3.25E-47	0.6090056728	0.777	0.625	1.84E-42	6
PALD1	4.90E-47	1.64577653	0.187	0.068	2.78E-42	6
ANXA5	5.37E-47	0.5204142614	0.812	0.704	3.04E-42	6
STARD4	7.43E-47	1.258283063	0.259	0.114	4.20E-42	6
P3H1	8.00E-47	1.318868657	0.276	0.126	4.53E-42	6
EDIL3	9.04E-47	1.428417268	0.164	0.054	5.12E-42	6
MSANTD3	9.84E-47	1.426762228	0.201	0.076	5.57E-42	6
WIPI1	1.01E-46	1.553057378	0.174	0.06	5.74E-42	6
PHPT1	1.09E-46	0.7417158821	0.653	0.488	6.16E-42	6
CASP9	1.38E-46	2.06827772	0.124	0.034	7.82E-42	6
PDIA6	2.60E-46	0.6067667754	0.757	0.629	1.47E-41	6
CREB3L2	2.95E-46	1.067984371	0.359	0.189	1.67E-41	6
PDIA3	4.27E-46	0.5576081227	0.829	0.711	2.42E-41	6
HYOU1	4.99E-46	1.191046523	0.282	0.132	2.82E-41	6
COPE	9.53E-46	0.7498176147	0.635	0.484	5.40E-41	6
BEX3	1.20E-45	1.572581142	0.29	0.146	6.79E-41	6
JAK1	1.29E-45	0.5922836761	0.78	0.66	7.28E-41	6
SSR3	1.65E-45	0.7101861542	0.641	0.478	9.36E-41	6
MSMO1	1.76E-45	1.537873789	0.253	0.114	9.94E-41	6
ELOB	1.76E-45	1.224628974	0.432	0.278	9.96E-41	6
KDELR2	2.86E-45	0.6847818852	0.69	0.539	1.62E-40	6
HCLS1	2.89E-45	1.270343383	0.264	0.118	1.64E-40	6
TNFAIP8L1	3.15E-45	1.162683379	0.31	0.153	1.78E-40	6
H2AFJ	6.41E-45	0.9426254147	0.475	0.299	3.63E-40	6
TUBA1A	6.54E-45	0.6037693098	0.765	0.618	3.70E-40	6
LXN	7.73E-45	1.061409716	0.418	0.246	4.38E-40	6
GOSR2	1.01E-44	1.317759458	0.231	0.098	5.70E-40	6
RASSF2	2.83E-44	1.597557814	0.162	0.055	1.60E-39	6
TWF2	2.99E-44	0.8511076658	0.504	0.32	1.69E-39	6
ATP5MF	8.06E-44	1.424540509	0.336	0.187	4.56E-39	6
PSMB6	2.02E-43	0.7421706161	0.663	0.528	1.14E-38	6
NDUFA3	2.43E-43	0.9011996126	0.547	0.374	1.38E-38	6
TYMP	2.84E-43	0.672909388	0.649	0.461	1.61E-38	6
8-9월	3.05E-43	1.383061279	0.215	0.088	1.73E-38	6
LAMTOR2	3.33E-43	0.7375190997	0.611	0.446	1.89E-38	6
STMP1	3.74E-43	1.750133392	0.227	0.101	2.12E-38	6
ORAI2	4.37E-43	1.069237279	0.315	0.161	2.48E-38	6
LYN	5.60E-43	1.128833588	0.315	0.161	3.17E-38	6
LCP2	6.11E-43	1.299891274	0.22	0.092	3.46E-38	6
PTPRK	6.75E-43	0.8061591737	0.539	0.363	3.82E-38	6
ANXA6	6.76E-43	1.105260692	0.391	0.225	3.83E-38	6
MZT2B	6.80E-43	0.8063454118	0.647	0.482	3.85E-38	6
MZT2A	9.67E-43	0.8693523309	0.487	0.316	5.48E-38	6
MAGED1	1.00E-42	1.176257597	0.318	0.165	5.67E-38	6
MAP1S	1.19E-42	1.406778225	0.262	0.122	6.73E-38	6
CLTB	1.31E-42	0.7131194438	0.653	0.497	7.44E-38	6
LAMA5	1.35E-42	0.8673247506	0.597	0.426	7.65E-38	6
ACTR3	1.69E-42	0.6743821918	0.688	0.548	9.58E-38	6
SEC61A1	1.83E-42	0.8441404684	0.513	0.339	1.03E-37	6
RNASEH2C	2.54E-42	0.8601801321	0.499	0.322	1.44E-37	6
MXD4	2.92E-42	1.200722208	0.299	0.15	1.65E-37	6
PKN1	3.11E-42	1.076132038	0.365	0.203	1.76E-37	6
CDH5	4.50E-42	0.598241882	0.745	0.603	2.55E-37	6
CITED4	6.99E-42	1.671019871	0.18	0.068	3.96E-37	6
FKBP2	1.22E-41	0.6462475582	0.649	0.475	6.88E-37	6
APRT	1.50E-41	0.6142075276	0.745	0.611	8.48E-37	6
CDK2AP1	1.69E-41	1.164753058	0.307	0.159	9.55E-37	6
IGFBP51	1.97E-41	2.32658797	0.161	0.058	1.11E-36	6
ANAPC11	3.04E-41	0.602735252	0.705	0.544	1.72E-36	6
PLEKHG5	4.23E-41	1.591660799	0.153	0.052	2.39E-36	6
TRAPPC1	4.63E-41	0.6460483011	0.665	0.513	2.62E-36	6
MATN2	5.10E-41	0.7669543228	0.58	0.414	2.89E-36	6
C12orf57	5.60E-41	0.6462309575	0.685	0.537	3.17E-36	6
COX5B	5.73E-41	0.5229077976	0.862	0.785	3.25E-36	6
COX5A	6.36E-41	0.5688268514	0.74	0.614	3.60E-36	6
DBN1	6.43E-41	0.8633407675	0.429	0.257	3.64E-36	6
F2R	7.81E-41	0.7923134741	0.493	0.314	4.42E-36	6
PGM2L1	9.70E-41	0.8985487613	0.428	0.258	5.49E-36	6
DAD1	9.88E-41	0.5064019327	0.822	0.742	5.59E-36	6
ISOC2	1.28E-40	1.031958984	0.377	0.218	7.27E-36	6
PTGFRN	1.51E-40	1.95860348	0.106	0.028	8.57E-36	6
SLC26A6	1.84E-40	1.673260138	0.128	0.039	1.04E-35	6
MYADM	2.70E-40	0.6476025624	0.622	0.444	1.53E-35	6
MARCKSL1	2.96E-40	0.5016388779	0.833	0.723	1.68E-35	6
LAMTOR5	3.07E-40	0.6069544494	0.716	0.579	1.74E-35	6
COX8A	3.10E-40	0.5717691553	0.771	0.664	1.75E-35	6
KDR	3.98E-40	0.8275871524	0.472	0.302	2.26E-35	6
TNFRSF21	4.38E-40	1.95975802	0.111	0.031	2.48E-35	6
PET100	5.98E-40	0.8299331914	0.555	0.383	3.39E-35	6
PON2	1.17E-39	0.7068308315	0.594	0.431	6.64E-35	6
UBE2L3	1.24E-39	0.6998531917	0.631	0.475	7.00E-35	6
DYNLT1	1.45E-39	0.7128375756	0.618	0.461	8.21E-35	6
ABRACL	2.41E-39	0.9147384328	0.468	0.303	1.36E-34	6
OAZ3	2.97E-39	1.99397839	0.139	0.047	1.68E-34	6
F3	6.23E-39	1.483411289	0.169	0.063	3.53E-34	6
PDLIM7	7.27E-39	0.8047714027	0.482	0.311	4.12E-34	6
TMED10	1.32E-38	0.6034535997	0.68	0.524	7.48E-34	6
PSMA4	1.40E-38	0.6688052799	0.646	0.492	7.94E-34	6
C1orf122	1.67E-38	0.9880714125	0.42	0.258	9.46E-34	6
NREP	2.00E-38	1.115000174	0.376	0.223	1.13E-33	6
SOX41	2.19E-38	0.5463859059	0.696	0.54	1.24E-33	6
NDUFB7	2.40E-38	0.6504265977	0.68	0.521	1.36E-33	6
PHLDB2	3.28E-38	0.7799022479	0.386	0.224	1.86E-33	6
TNIP1	4.53E-38	0.8660204501	0.506	0.348	2.57E-33	6
CHCHD1	4.97E-38	0.8607874366	0.399	0.238	2.81E-33	6
FBN1	5.12E-38	0.8647078729	0.461	0.294	2.90E-33	6
CTTN	5.45E-38	0.6995853232	0.574	0.409	3.09E-33	6
SEC23A	5.49E-38	0.9318461601	0.374	0.217	3.11E-33	6
MRPL17	6.05E-38	0.87605955	0.464	0.303	3.43E-33	6
VKORC1	1.06E-37	0.9133542354	0.458	0.294	5.98E-33	6
CCDC801	1.17E-37	0.877771663	0.246	0.115	6.61E-33	6
FHOD1	1.89E-37	1.327365514	0.198	0.084	1.07E-32	6
FLNB	2.02E-37	0.6840852684	0.647	0.484	1.14E-32	6
COPG1	2.03E-37	1.10624748	0.304	0.162	1.15E-32	6
YIF1A	2.76E-37	0.8061821646	0.471	0.31	1.56E-32	6
RAB32	2.84E-37	1.023175866	0.327	0.182	1.61E-32	6
ATP5MPL	5.13E-37	1.200551832	0.384	0.241	2.90E-32	6
NDUFS8	5.85E-37	0.6939272283	0.603	0.444	3.31E-32	6
STARD10	7.66E-37	1.220095062	0.189	0.078	4.34E-32	6
MRPL27	9.05E-37	0.8829220029	0.425	0.264	5.13E-32	6
COPS9	1.62E-36	1.315298394	0.352	0.216	9.15E-32	6
CCDC167	1.70E-36	1.329916328	0.228	0.106	9.64E-32	6
SURF4	3.46E-36	0.771763414	0.496	0.332	1.96E-31	6
PTPRE	4.09E-36	0.8720679394	0.442	0.288	2.32E-31	6
CTSZ	4.68E-36	0.7900918656	0.507	0.347	2.65E-31	6
HDLBP	4.70E-36	0.7497033856	0.571	0.427	2.66E-31	6
SAMD4A	4.90E-36	0.9847390156	0.354	0.204	2.77E-31	6
CLIC4	5.44E-36	0.6307854191	0.688	0.569	3.08E-31	6
MANF	5.82E-36	0.8016933404	0.506	0.35	3.29E-31	6
NDUFS7	8.41E-36	0.6624120925	0.589	0.427	4.76E-31	6
NAA38	1.02E-35	0.6427101743	0.693	0.545	5.80E-31	6
LAGE3	1.11E-35	0.8158786562	0.46	0.298	6.27E-31	6
MAZ	1.22E-35	0.9917595599	0.336	0.19	6.92E-31	6
TGFB1I1	1.62E-35	0.8538545789	0.464	0.303	9.19E-31	6
DDI2	1.89E-35	1.135927808	0.234	0.112	1.07E-30	6
ATP5ME	1.90E-35	1.113598939	0.389	0.247	1.08E-30	6
MRPL51	2.03E-35	0.5714670899	0.68	0.532	1.15E-30	6
UBA1	2.25E-35	0.9610026897	0.417	0.262	1.27E-30	6
MRPL36	2.48E-35	0.8355215149	0.426	0.27	1.40E-30	6
OSTC	2.93E-35	0.5572649538	0.698	0.562	1.66E-30	6
SNRPD1	2.95E-35	0.6895620112	0.646	0.496	1.67E-30	6
SCD	2.97E-35	1.85748246	0.119	0.039	1.68E-30	6
NDUFB1	3.36E-35	0.7114382817	0.626	0.47	1.90E-30	6
SLC16A3	3.62E-35	1.091093066	0.321	0.181	2.05E-30	6
UQCR10	4.15E-35	0.6975875976	0.609	0.453	2.35E-30	6
FKBP10	4.44E-35	0.8147945635	0.459	0.3	2.51E-30	6
FGFR1	4.81E-35	0.8143640841	0.381	0.226	2.72E-30	6
MRPL12	5.43E-35	1.19526031	0.24	0.117	3.07E-30	6
HSD17B10	7.24E-35	0.8305126385	0.462	0.306	4.10E-30	6
ATP5F1D	7.48E-35	1.024493467	0.374	0.233	4.23E-30	6
RPS27L	1.32E-34	0.5119244238	0.798	0.688	7.49E-30	6
FHL3	1.50E-34	1.297967491	0.186	0.079	8.51E-30	6
IL34	2.07E-34	1.544104406	0.128	0.043	1.17E-29	6
HMGCS1	2.21E-34	1.316880489	0.262	0.137	1.25E-29	6
POLR2J3.1	2.64E-34	1.639147615	0.121	0.04	1.49E-29	6
PLXNA2	2.64E-34	0.8514356916	0.345	0.198	1.50E-29	6
NDUFA6	2.87E-34	0.6767195207	0.582	0.428	1.62E-29	6
NDUFAB1	3.17E-34	0.6239520098	0.619	0.478	1.79E-29	6
JAG2	4.19E-34	1.046443373	0.301	0.165	2.37E-29	6
CHPF2	5.04E-34	1.304097091	0.17	0.07	2.85E-29	6
CAPNS1	5.09E-34	0.635004827	0.67	0.517	2.88E-29	6
CFDP1	6.23E-34	0.8020723432	0.537	0.386	3.53E-29	6
GTF2I	6.89E-34	0.7026989735	0.56	0.405	3.90E-29	6
RALBP1	9.51E-34	0.714408947	0.529	0.37	5.39E-29	6
GJC1	1.01E-33	1.67294357	0.115	0.037	5.70E-29	6
PLS3	1.20E-33	0.8346186674	0.538	0.389	6.78E-29	6
PSMB2	2.20E-33	0.6200639454	0.605	0.461	1.24E-28	6
P3H4	2.38E-33	1.33549265	0.195	0.087	1.35E-28	6
DRAP1	3.63E-33	0.6366112058	0.583	0.428	2.05E-28	6
STRN4	4.47E-33	1.056608039	0.282	0.151	2.53E-28	6
ARPC5	5.78E-33	0.5423694728	0.685	0.549	3.28E-28	6
NDUFB8	6.86E-33	0.9379429334	0.42	0.273	3.88E-28	6
UBE2F	8.74E-33	1.016709309	0.241	0.119	4.95E-28	6
ATP5MG	1.12E-32	0.9878393521	0.42	0.286	6.32E-28	6
ROBO1	1.13E-32	0.8344350022	0.382	0.234	6.42E-28	6
LINC01235	1.41E-32	1.148734718	0.189	0.083	8.00E-28	6
CDC42EP5	1.77E-32	1.111479312	0.359	0.223	1.00E-27	6
SLIRP	1.79E-32	0.688659076	0.599	0.456	1.01E-27	6
CTSS	2.04E-32	0.7344959579	0.534	0.38	1.15E-27	6
PNPLA6	2.49E-32	1.202402407	0.238	0.118	1.41E-27	6
PSMB7	2.57E-32	0.6745272524	0.551	0.399	1.46E-27	6
PGD	2.64E-32	1.092303705	0.266	0.141	1.50E-27	6
TRIOBP	2.85E-32	0.6706301255	0.571	0.425	1.61E-27	6
VCL	3.12E-32	0.9112252221	0.423	0.275	1.77E-27	6
ATP5MD	3.91E-32	1.033571983	0.374	0.244	2.22E-27	6
SH2B3	4.05E-32	0.9114059215	0.353	0.212	2.29E-27	6
LAMC2	4.56E-32	1.455123333	0.161	0.066	2.58E-27	6
FAM114A1	7.59E-32	0.8060300171	0.402	0.253	4.30E-27	6
RCC2	7.77E-32	1.008194705	0.252	0.13	4.40E-27	6
GRPEL2	1.09E-31	1.460070836	0.146	0.057	6.15E-27	6
PPM1F	1.38E-31	0.8130310044	0.397	0.251	7.80E-27	6
SREBF2	1.87E-31	1.063977609	0.217	0.103	1.06E-26	6
PPP1CA	2.43E-31	0.5948577269	0.629	0.492	1.37E-26	6
FBXO32	2.43E-31	1.206372729	0.179	0.078	1.38E-26	6
RBX1	3.20E-31	0.5276348263	0.756	0.642	1.81E-26	6
ROBO4	3.21E-31	0.6644395404	0.592	0.453	1.82E-26	6
MACF1	3.96E-31	0.5380913584	0.715	0.576	2.24E-26	6
IGKC	4.29E-31	2.774946498	0.294	0.17	2.43E-26	6
MAP4K4	4.52E-31	0.7356804567	0.479	0.33	2.56E-26	6
DNPH1	6.65E-31	1.074746716	0.263	0.141	3.76E-26	6
JPT11	6.88E-31	1.429047704	0.196	0.093	3.90E-26	6
FAM43A	6.91E-31	0.7394942781	0.466	0.319	3.91E-26	6
OCIAD2	8.35E-31	0.7442311815	0.535	0.389	4.73E-26	6
PTK7	8.73E-31	1.394121612	0.151	0.061	4.95E-26	6
C19orf70	9.96E-31	0.6223695803	0.551	0.391	5.64E-26	6
APLP2	1.00E-30	0.5085047187	0.743	0.63	5.68E-26	6
TBXA2R	1.38E-30	1.434369535	0.138	0.053	7.83E-26	6
MFAP2	1.43E-30	1.517757248	0.121	0.043	8.11E-26	6
RFXANK	1.44E-30	0.9258297038	0.346	0.209	8.15E-26	6
PSMB5	1.64E-30	0.5588568241	0.676	0.567	9.30E-26	6
NUDT14	1.65E-30	0.7340183697	0.51	0.362	9.33E-26	6
TXNL4A	2.58E-30	0.834721305	0.381	0.239	1.46E-25	6
PSMD8	3.08E-30	0.5787819694	0.641	0.508	1.75E-25	6
BAX	3.51E-30	0.6542598892	0.565	0.427	1.99E-25	6
GNB1	3.92E-30	0.6178874495	0.609	0.462	2.22E-25	6
SIPA1	5.17E-30	1.242870537	0.194	0.091	2.93E-25	6
RSU1	5.19E-30	0.6574821164	0.535	0.389	2.94E-25	6
NHP2	7.91E-30	0.5774027208	0.648	0.516	4.48E-25	6
VCP	8.66E-30	0.5241012806	0.667	0.531	4.91E-25	6
PDLIM5	9.83E-30	0.5581653253	0.746	0.638	5.56E-25	6
FADS31	1.00E-29	1.062690241	0.217	0.108	5.69E-25	6
UBALD21	1.22E-29	0.8120176776	0.318	0.185	6.88E-25	6
ADGRL2	1.37E-29	0.8062137419	0.408	0.268	7.77E-25	6
PSMD1	1.94E-29	0.7050533553	0.432	0.285	1.10E-24	6
HMOX2	2.20E-29	0.8066682722	0.383	0.244	1.24E-24	6
SEC24D	2.30E-29	1.027525552	0.267	0.146	1.30E-24	6
YKT6	2.74E-29	1.10203474	0.219	0.109	1.55E-24	6
DNM3OS	3.20E-29	1.510762799	0.121	0.044	1.81E-24	6
PRKCDBP	3.92E-29	1.221780682	0.44	0.343	2.22E-24	6
FAM50A	4.37E-29	0.7643011024	0.443	0.301	2.47E-24	6
SEM1	5.03E-29	0.9876890383	0.391	0.267	2.85E-24	6
RASAL3	5.93E-29	1.412531044	0.141	0.057	3.36E-24	6
CNPY2	6.30E-29	0.8697675364	0.376	0.24	3.57E-24	6
SEC13	7.76E-29	0.7209186636	0.484	0.34	4.40E-24	6
P4HA2	8.39E-29	1.327248494	0.153	0.064	4.75E-24	6
MIF	1.03E-28	0.5361083559	0.852	0.842	5.85E-24	6
CKLF	1.07E-28	0.8951963	0.346	0.212	6.09E-24	6
CPNE5	1.12E-28	1.499438998	0.139	0.056	6.33E-24	6
POLR2F	1.28E-28	0.6438884133	0.528	0.383	7.25E-24	6
EXOC3L2	1.71E-28	1.15078022	0.242	0.129	9.68E-24	6
PSMA1	1.86E-28	0.5553660932	0.613	0.472	1.05E-23	6
DOK5	1.97E-28	1.141579873	0.198	0.095	1.12E-23	6
GANAB	2.20E-28	0.7579039973	0.393	0.255	1.25E-23	6
GMFG	2.26E-28	0.5704998835	0.722	0.591	1.28E-23	6
NUDT5	2.42E-28	0.7931228606	0.411	0.27	1.37E-23	6
SPRY41	3.47E-28	1.046416871	0.272	0.152	1.97E-23	6
NDUFB6	4.09E-28	0.6205621516	0.574	0.435	2.32E-23	6
MRPS12	5.05E-28	0.7849387531	0.413	0.274	2.86E-23	6
TMEM160	6.54E-28	0.7250007574	0.463	0.319	3.71E-23	6
TNFRSF25	6.91E-28	1.541071295	0.1	0.034	3.91E-23	6
POLR2J	8.96E-28	0.710492236	0.469	0.333	5.07E-23	6
MGAT4B	1.13E-27	0.9584414629	0.256	0.139	6.38E-23	6
NT5C	1.44E-27	0.9112505415	0.295	0.172	8.18E-23	6
MRPL15	1.83E-27	0.8580328853	0.341	0.213	1.04E-22	6
MCTS1	2.50E-27	0.6696264847	0.449	0.311	1.41E-22	6
HEBP2	2.69E-27	0.785586754	0.447	0.311	1.52E-22	6
CDR2L	3.19E-27	1.175302502	0.161	0.072	1.80E-22	6
RGL1	4.11E-27	1.017400887	0.214	0.107	2.33E-22	6
MICAL2	4.37E-27	1.423734048	0.106	0.037	2.47E-22	6
CAPZA1	5.95E-27	0.7272163128	0.461	0.324	3.37E-22	6
TIMMDC1	6.12E-27	0.6262747361	0.536	0.39	3.47E-22	6
EBP	6.27E-27	0.9348186942	0.254	0.139	3.55E-22	6
LASP1	6.43E-27	0.7721579008	0.412	0.272	3.64E-22	6
CENPB	6.59E-27	0.9956154141	0.24	0.129	3.73E-22	6
LSM7	7.62E-27	0.54073197	0.637	0.506	4.31E-22	6
MRPS21	8.30E-27	0.5065994089	0.684	0.556	4.70E-22	6
PTBP2	9.85E-27	0.9086022142	0.216	0.11	5.58E-22	6
HMGB3	1.07E-26	0.8718915512	0.174	0.08	6.05E-22	6
SMYD2	1.25E-26	1.177376232	0.139	0.058	7.08E-22	6
MGAT5	1.28E-26	1.432698618	0.129	0.052	7.23E-22	6
PICALM	1.30E-26	0.5404652945	0.573	0.432	7.35E-22	6
EMP31	1.37E-26	0.90332132	0.269	0.152	7.77E-22	6
TFPT	1.66E-26	0.9538117824	0.304	0.183	9.38E-22	6
PDE4B	1.71E-26	0.9151655711	0.298	0.174	9.68E-22	6
PPP4C	2.15E-26	0.5451568205	0.583	0.449	1.22E-21	6
MMP15	2.53E-26	0.9876791314	0.211	0.108	1.43E-21	6
SLC12A5	2.58E-26	1.483352957	0.1	0.035	1.46E-21	6
EHD3	3.35E-26	1.171308438	0.165	0.076	1.90E-21	6
WDR1	3.49E-26	0.5673972853	0.626	0.502	1.98E-21	6
UQCRC1	3.60E-26	0.7051599538	0.452	0.316	2.04E-21	6
DGKD	3.89E-26	1.445544743	0.115	0.043	2.20E-21	6
RNF181	4.03E-26	0.533573916	0.611	0.476	2.28E-21	6
VARS	4.12E-26	1.101848567	0.222	0.117	2.33E-21	6
RFTN1	4.22E-26	0.9934657528	0.295	0.177	2.39E-21	6
SERPINE21	4.48E-26	1.130744797	0.173	0.081	2.54E-21	6
MPZL1	4.50E-26	0.7190074121	0.414	0.278	2.55E-21	6
UBTD1	4.98E-26	0.7361813948	0.344	0.212	2.82E-21	6
CETP	5.38E-26	1.508027552	0.132	0.055	3.05E-21	6
SYMPK	6.01E-26	0.9641789562	0.248	0.137	3.40E-21	6
EIF6	6.19E-26	0.6087823399	0.552	0.415	3.51E-21	6
GPR137	6.47E-26	0.8013220429	0.318	0.192	3.66E-21	6
LONP1	7.07E-26	1.422300185	0.16	0.073	4.00E-21	6
PTRH1	9.97E-26	0.9258843499	0.279	0.162	5.65E-21	6
ANGPT2	1.05E-25	0.6094579942	0.476	0.332	5.95E-21	6
KLHL42	1.07E-25	1.040298657	0.184	0.089	6.06E-21	6
REPIN1	1.21E-25	1.120371913	0.224	0.12	6.85E-21	6
CDH11	1.59E-25	1.340966631	0.155	0.07	9.01E-21	6
DNAJC5	1.94E-25	1.171787529	0.192	0.096	1.10E-20	6
DNAJC10	2.22E-25	0.6623726637	0.449	0.308	1.26E-20	6
XXYLT1	2.70E-25	1.142349252	0.17	0.08	1.53E-20	6
UBE2J1	3.34E-25	0.6328998543	0.516	0.386	1.89E-20	6
RANBP1	4.65E-25	0.5225400754	0.624	0.503	2.63E-20	6
REEP5	4.68E-25	0.5203563397	0.663	0.55	2.65E-20	6
MBD3	4.85E-25	1.10123255	0.199	0.102	2.75E-20	6
ADAM10	6.14E-25	0.646944495	0.473	0.339	3.47E-20	6
FAM118A	6.22E-25	1.036444845	0.3	0.185	3.52E-20	6
ATP5PF	6.31E-25	0.937614238	0.366	0.253	3.57E-20	6
NID1	6.66E-25	0.860026295	0.305	0.187	3.77E-20	6
SNRPD3	7.12E-25	0.5528876428	0.612	0.507	4.03E-20	6
CSNK2B	7.65E-25	0.5250117718	0.611	0.48	4.33E-20	6
MPRIP	8.18E-25	0.6687681713	0.386	0.255	4.63E-20	6
SLC2A6	9.58E-25	1.441948283	0.136	0.058	5.43E-20	6
VASH1	1.37E-24	1.065091037	0.193	0.098	7.75E-20	6
PLA2G4C	1.38E-24	0.92041779	0.223	0.12	7.84E-20	6
COPB1	1.42E-24	0.7101042185	0.4	0.269	8.06E-20	6
FHL2	1.43E-24	1.110538022	0.153	0.069	8.11E-20	6
SYCE1L	1.67E-24	1.050734898	0.235	0.129	9.44E-20	6
BAK1	1.92E-24	1.308333673	0.138	0.059	1.09E-19	6
MICALL2	1.97E-24	1.211980534	0.115	0.045	1.11E-19	6
CCDC124	2.12E-24	0.6629758312	0.495	0.363	1.20E-19	6
PGLS	2.20E-24	0.6058676649	0.551	0.429	1.24E-19	6
NDUFB3	2.20E-24	0.5715536062	0.533	0.404	1.25E-19	6
EXTL3	2.73E-24	1.377762686	0.119	0.048	1.54E-19	6
PLXND1	2.87E-24	0.5683777734	0.6	0.479	1.63E-19	6
SVIP	3.12E-24	0.744394111	0.439	0.311	1.77E-19	6
JOSD2	3.30E-24	0.7664240198	0.359	0.232	1.87E-19	6
PTPRG	3.38E-24	0.7291303051	0.275	0.159	1.91E-19	6
TNS3	3.64E-24	1.170019664	0.138	0.06	2.06E-19	6
IQSEC1	4.51E-24	0.8994219243	0.25	0.143	2.56E-19	6
ABHD17C	4.56E-24	1.214041531	0.143	0.064	2.58E-19	6
BOK	4.64E-24	1.14784983	0.152	0.069	2.63E-19	6
TIE1	5.22E-24	0.5098427433	0.607	0.48	2.96E-19	6
MRPS34	5.39E-24	0.6662773218	0.432	0.303	3.05E-19	6
SGCB	5.66E-24	0.9343591794	0.221	0.118	3.20E-19	6
CLSTN3	8.64E-24	0.7460309106	0.386	0.26	4.89E-19	6
PTOV1	9.52E-24	0.6594992631	0.413	0.281	5.39E-19	6
MRPL55	1.03E-23	0.6813209333	0.399	0.271	5.82E-19	6
HDAC1	1.27E-23	0.7142998185	0.458	0.331	7.19E-19	6
KLHL5	1.33E-23	0.8847390526	0.272	0.161	7.52E-19	6
RAB34	1.65E-23	1.086257036	0.163	0.078	9.32E-19	6
GOLM1	1.70E-23	0.6381103669	0.314	0.191	9.63E-19	6
NUTF2	1.94E-23	0.5526508775	0.539	0.412	1.10E-18	6
REXO2	1.97E-23	0.5212403401	0.641	0.522	1.12E-18	6
CTSD	3.11E-23	0.5922102143	0.548	0.411	1.76E-18	6
FKBP3	3.25E-23	0.6930510594	0.406	0.278	1.84E-18	6
BCL6B	3.69E-23	0.6757545658	0.322	0.201	2.09E-18	6
PFDN4	3.69E-23	0.654873441	0.425	0.295	2.09E-18	6
NECTIN2	3.79E-23	0.7873492998	0.356	0.239	2.15E-18	6
CISD2	3.95E-23	0.805793561	0.343	0.222	2.24E-18	6
NPC1	3.95E-23	1.022975652	0.196	0.102	2.24E-18	6
TCEAL8	4.76E-23	0.6202315969	0.448	0.319	2.70E-18	6
CAVIN1	5.37E-23	0.7039250534	0.435	0.315	3.04E-18	6
NT5E	5.48E-23	0.6896301859	0.339	0.218	3.10E-18	6
SELENOS	5.74E-23	0.9623192083	0.289	0.183	3.25E-18	6
LOXL2	5.96E-23	0.7426477831	0.343	0.222	3.38E-18	6
MRPL20	6.38E-23	0.5342450104	0.619	0.504	3.62E-18	6
ATP5MC3	8.92E-23	1.240997061	0.254	0.155	5.05E-18	6
NRGN	1.11E-22	0.8892463928	0.211	0.113	6.31E-18	6
ISG15	1.29E-22	0.5854967118	0.565	0.428	7.31E-18	6
CAD	1.54E-22	1.478988665	0.111	0.045	8.73E-18	6
TRIM281	1.60E-22	0.6036220878	0.405	0.274	9.05E-18	6
EMC6	1.63E-22	0.6412353161	0.412	0.286	9.24E-18	6
MARVELD1	1.89E-22	1.079133203	0.163	0.08	1.07E-17	6
TFDP1	1.92E-22	0.8543829009	0.272	0.163	1.09E-17	6
TMEM204	2.08E-22	0.6427495598	0.458	0.329	1.18E-17	6
ARL4C	2.15E-22	0.5929585635	0.33	0.208	1.22E-17	6
CSNK1G2	2.57E-22	0.9290808688	0.25	0.147	1.46E-17	6
SELENOH	2.67E-22	0.9272033309	0.33	0.222	1.51E-17	6
FAAP20	3.01E-22	0.6262126748	0.5	0.377	1.71E-17	6
ITPR3	3.22E-22	0.8478838854	0.231	0.13	1.82E-17	6
PSMD7	3.41E-22	0.5726521005	0.524	0.395	1.93E-17	6
STT3B	3.81E-22	0.8204959504	0.305	0.193	2.16E-17	6
SSNA1	3.95E-22	0.5801160184	0.471	0.346	2.24E-17	6
NRIP1	4.08E-22	0.6965443753	0.301	0.187	2.31E-17	6
CTGF	4.94E-22	0.6774590024	0.61	0.483	2.80E-17	6
MUM1	5.09E-22	0.9960699894	0.195	0.103	2.88E-17	6
SLC12A2	5.52E-22	0.9237937661	0.204	0.11	3.13E-17	6
ALG3	6.37E-22	0.8974125689	0.269	0.162	3.61E-17	6
CRNDE	7.02E-22	0.8540978406	0.211	0.114	3.97E-17	6
FAM173A	7.32E-22	0.8891333371	0.23	0.129	4.14E-17	6
FAM207A	7.46E-22	0.8904493913	0.261	0.155	4.23E-17	6
CSF2RB	7.76E-22	0.5430370982	0.583	0.452	4.39E-17	6
RTEL1-TNFRSF6B	7.77E-22	1.528750929	0.324	0.229	4.40E-17	6
CNIH4	8.27E-22	0.5366969811	0.551	0.425	4.68E-17	6
SPP1	8.53E-22	1.725415608	0.202	0.111	4.83E-17	6
CERS4	8.60E-22	1.34259305	0.105	0.042	4.87E-17	6
EFEMP2	9.54E-22	1.140480682	0.115	0.048	5.40E-17	6
MRPS16	9.95E-22	0.6366794877	0.417	0.287	5.63E-17	6
RRAS	1.03E-21	0.8260123843	0.269	0.164	5.81E-17	6
ZDHHC14	1.06E-21	1.041963923	0.147	0.069	5.98E-17	6
GPX7	1.57E-21	0.9115254137	0.179	0.091	8.89E-17	6
FASN	1.65E-21	0.9642102336	0.137	0.062	9.34E-17	6
ACLY	1.66E-21	0.7832314546	0.31	0.199	9.37E-17	6
DEF8	1.78E-21	0.8012739741	0.28	0.171	1.01E-16	6
HMGCR	2.13E-21	0.987928641	0.159	0.078	1.21E-16	6
UNC119B	2.20E-21	1.244596921	0.105	0.042	1.24E-16	6
COA3	2.36E-21	0.5939998968	0.432	0.307	1.34E-16	6
TMEM8A	2.58E-21	1.012844384	0.195	0.105	1.46E-16	6
ATP5IF1	2.76E-21	0.9318402279	0.328	0.225	1.56E-16	6
GIPC3	2.83E-21	1.228657565	0.138	0.064	1.60E-16	6
ERLEC1	3.15E-21	0.627922496	0.445	0.325	1.78E-16	6
GLRX3	3.31E-21	0.6739811668	0.411	0.291	1.87E-16	6
MTSS1	3.45E-21	0.941968696	0.141	0.066	1.95E-16	6
GARS	3.59E-21	0.7560927884	0.337	0.223	2.03E-16	6
MRPL57	3.59E-21	0.5897777062	0.495	0.374	2.03E-16	6
MYO1D	3.78E-21	0.9278236791	0.158	0.077	2.14E-16	6
ATP8B2	3.89E-21	0.9571849865	0.128	0.057	2.20E-16	6
GFPT1	4.08E-21	1.002031926	0.168	0.085	2.31E-16	6
C7orf73	4.50E-21	0.8053469793	0.293	0.187	2.55E-16	6
FBXW5	4.52E-21	0.6438515001	0.447	0.326	2.56E-16	6
NHSL1	4.67E-21	1.182461547	0.121	0.052	2.64E-16	6
ZNF593	5.10E-21	0.6385391412	0.413	0.291	2.89E-16	6
NR1D1	5.25E-21	1.22496054	0.134	0.062	2.97E-16	6
DDA1	5.97E-21	0.7407329847	0.289	0.181	3.38E-16	6
COPZ1	6.64E-21	0.6235619072	0.433	0.311	3.76E-16	6
UCHL3	6.83E-21	0.8124402879	0.282	0.174	3.87E-16	6
TKT	8.11E-21	0.5191962991	0.541	0.42	4.59E-16	6
GYPC	1.04E-20	0.6260274155	0.394	0.272	5.88E-16	6
NOMO1	1.23E-20	1.069910827	0.141	0.067	6.97E-16	6
SEC31A	1.27E-20	0.5573958551	0.498	0.376	7.19E-16	6
JAK3	1.34E-20	0.8194118151	0.224	0.127	7.58E-16	6
SH3GL1	1.49E-20	0.5805532431	0.347	0.227	8.43E-16	6
PAPSS1	1.57E-20	0.7515080406	0.313	0.203	8.88E-16	6
RABL6	2.03E-20	0.8873466523	0.23	0.134	1.15E-15	6
RDH11	2.21E-20	0.7205688478	0.312	0.202	1.25E-15	6
WDFY1	2.50E-20	0.7348647094	0.327	0.214	1.41E-15	6
RHOG	2.82E-20	0.5836074984	0.466	0.345	1.59E-15	6
VASP	2.91E-20	0.5676710946	0.489	0.37	1.65E-15	6
EFNB1	3.43E-20	0.9397676789	0.204	0.114	1.94E-15	6
EIF3J	3.48E-20	0.622282418	0.475	0.356	1.97E-15	6
EIF3B	3.58E-20	0.7102400547	0.344	0.231	2.03E-15	6
NAGLU	3.69E-20	1.46829778	0.128	0.059	2.09E-15	6
PSMD2	4.02E-20	0.6762406399	0.447	0.331	2.28E-15	6
SNRPC	4.23E-20	0.5140368859	0.513	0.393	2.39E-15	6
NAV1	4.34E-20	0.8434899638	0.255	0.154	2.46E-15	6
DHRSX	4.61E-20	0.8751344731	0.185	0.099	2.61E-15	6
EPHX4	5.04E-20	1.170824865	0.12	0.053	2.86E-15	6
ATP5F1B	5.08E-20	0.8840348813	0.319	0.218	2.88E-15	6
CCDC3	6.06E-20	0.8116209099	0.342	0.233	3.43E-15	6
TSTA3	6.10E-20	0.7543853549	0.301	0.193	3.45E-15	6
CPNE1	8.62E-20	0.6459295416	0.37	0.254	4.88E-15	6
COPS6	9.25E-20	0.5525183159	0.499	0.376	5.24E-15	6
SHKBP1	9.28E-20	0.6875222999	0.357	0.241	5.26E-15	6
YIF1B	9.29E-20	0.6339630857	0.35	0.235	5.26E-15	6
ATP2A2	1.18E-19	0.5462707759	0.411	0.296	6.69E-15	6
ST3GAL2	1.20E-19	0.897108447	0.189	0.103	6.79E-15	6
SRSF9	1.22E-19	0.5225159616	0.586	0.478	6.92E-15	6
EI24	1.30E-19	0.5534094921	0.512	0.392	7.38E-15	6
UNC119	1.33E-19	0.831185692	0.185	0.099	7.53E-15	6
TBCD	1.34E-19	0.7633946818	0.335	0.225	7.58E-15	6
HAGLROS	1.40E-19	1.357226499	0.12	0.054	7.91E-15	6
MSRB2	1.44E-19	0.8588048002	0.274	0.173	8.16E-15	6
PPP1R14B	1.49E-19	0.667046304	0.376	0.26	8.42E-15	6
SAYSD1	1.58E-19	1.072592274	0.188	0.103	8.93E-15	6
DGUOK	1.59E-19	0.5132557163	0.455	0.336	8.99E-15	6
ATP11A	1.60E-19	0.7102464408	0.278	0.176	9.04E-15	6
EIF4E2	1.79E-19	0.6599923845	0.388	0.273	1.01E-14	6
EXOSC4	1.87E-19	0.8437397939	0.228	0.134	1.06E-14	6
VDAC1	2.17E-19	0.5029956137	0.593	0.489	1.23E-14	6
LINC00152	2.24E-19	0.6284643937	0.213	0.121	1.27E-14	6
CIB1	2.52E-19	0.5231496617	0.532	0.417	1.43E-14	6
TMEM167A	2.63E-19	0.5576696553	0.415	0.298	1.49E-14	6
KCTD15	3.04E-19	0.9630630659	0.152	0.076	1.72E-14	6
CUX1	3.17E-19	0.643598674	0.374	0.262	1.79E-14	6
TXNRD2	3.22E-19	1.283999573	0.126	0.058	1.83E-14	6
STXBP2	3.29E-19	1.442085509	0.112	0.05	1.86E-14	6
TRAPPC2L	3.32E-19	0.6184596167	0.444	0.329	1.88E-14	6
LSM1	3.36E-19	0.6744639601	0.339	0.23	1.90E-14	6
SSSCA1	3.55E-19	0.6585853709	0.329	0.218	2.01E-14	6
DYNC1I2	4.22E-19	0.5828011891	0.513	0.4	2.39E-14	6
AP1S1	4.71E-19	0.6504875092	0.351	0.238	2.67E-14	6
GOLIM4	4.72E-19	0.6837865954	0.363	0.255	2.67E-14	6
MAP7D1	4.83E-19	0.6406456831	0.38	0.267	2.74E-14	6
GTF3C6	4.86E-19	0.5875964609	0.464	0.348	2.75E-14	6
PSENEN	5.12E-19	0.5780532118	0.44	0.322	2.90E-14	6
MRPL13	5.40E-19	0.6289709783	0.364	0.247	3.06E-14	6
UBE2Z	5.93E-19	0.5979061837	0.387	0.27	3.36E-14	6
COX7A1	6.53E-19	0.5182233275	0.551	0.435	3.70E-14	6
GRB10	6.70E-19	0.6216960137	0.376	0.265	3.79E-14	6
ZNF444	6.81E-19	1.009849817	0.161	0.084	3.85E-14	6
ARL1	7.62E-19	0.6473115136	0.404	0.292	4.31E-14	6
NDUFA9	8.05E-19	0.6451325974	0.297	0.191	4.56E-14	6
ETFB	8.75E-19	0.515440193	0.474	0.355	4.95E-14	6
COPB2	8.97E-19	0.5833182803	0.414	0.296	5.08E-14	6
ZDHHC20	9.28E-19	0.7278473914	0.277	0.176	5.26E-14	6
RNF19A	1.01E-18	0.5282998432	0.455	0.334	5.69E-14	6
AVEN	1.01E-18	1.170571996	0.122	0.057	5.73E-14	6
SKA2	1.13E-18	0.9321141971	0.193	0.109	6.39E-14	6
CRELD2	1.22E-18	0.740975769	0.34	0.232	6.93E-14	6
PINK1	1.30E-18	0.7040627912	0.267	0.167	7.38E-14	6
MYO9B	1.31E-18	0.9376914921	0.211	0.122	7.42E-14	6
NCBP2-AS2	1.44E-18	0.916873516	0.219	0.13	8.15E-14	6
ZFHX3	1.56E-18	0.653867569	0.219	0.127	8.83E-14	6
RGS12	1.76E-18	0.8208203482	0.254	0.158	9.99E-14	6
HDAC7	1.79E-18	0.5103690049	0.555	0.436	1.01E-13	6
CISD1	1.94E-18	0.5046569992	0.461	0.343	1.10E-13	6
MVD	1.99E-18	1.091151851	0.156	0.081	1.13E-13	6
KCTD17	2.03E-18	1.359716717	0.115	0.053	1.15E-13	6
SND1	2.04E-18	0.6775446481	0.341	0.233	1.16E-13	6
BOLA3	2.17E-18	0.6068758016	0.358	0.247	1.23E-13	6
MAPK12	2.22E-18	0.8998582976	0.246	0.152	1.26E-13	6
DDB1	2.54E-18	0.6997280443	0.388	0.275	1.44E-13	6
PARVB	2.61E-18	0.5006512734	0.575	0.481	1.48E-13	6
ZNF71	3.38E-18	1.131603531	0.128	0.061	1.92E-13	6
DMAC1	3.41E-18	1.190173438	0.17	0.093	1.93E-13	6
GTF2H5	3.45E-18	0.6159472615	0.432	0.32	1.95E-13	6
ZDHHC16	3.55E-18	0.7668491271	0.227	0.134	2.01E-13	6
MTCH2	3.74E-18	0.6358075718	0.349	0.239	2.12E-13	6
MAP2K2	6.30E-18	0.6178843263	0.345	0.237	3.57E-13	6
METRN	6.44E-18	1.241929189	0.152	0.08	3.64E-13	6
BMP1	7.29E-18	0.7889148299	0.266	0.169	4.13E-13	6
ATP5MC2	9.37E-18	0.6611622363	0.403	0.301	5.31E-13	6
BOP1	1.08E-17	1.018212412	0.188	0.106	6.14E-13	6
SELENON	1.15E-17	1.25638804	0.185	0.108	6.52E-13	6
TPM1	1.21E-17	0.6278684814	0.424	0.312	6.88E-13	6
CRIPT	1.35E-17	0.565108404	0.266	0.167	7.64E-13	6
PSMA5	1.43E-17	0.5327923656	0.469	0.362	8.11E-13	6
TM9SF3	1.44E-17	0.5194506807	0.494	0.378	8.17E-13	6
ARNTL2	1.47E-17	0.9831209573	0.228	0.14	8.34E-13	6
CLPP	1.59E-17	0.5480708607	0.443	0.332	8.98E-13	6
FYN	1.71E-17	0.5920634884	0.401	0.289	9.69E-13	6
C19orf24	1.90E-17	0.6092290167	0.391	0.278	1.07E-12	6
MAP2K1	1.93E-17	0.790288172	0.235	0.146	1.09E-12	6
SPPL2A	1.97E-17	0.5076416154	0.472	0.361	1.12E-12	6
ITPRIPL2	2.02E-17	0.8135555554	0.221	0.133	1.14E-12	6
GRINA	2.02E-17	0.5107517315	0.559	0.453	1.15E-12	6
TMEM189	2.12E-17	0.7325626307	0.202	0.116	1.20E-12	6
PPP6R1	2.44E-17	1.036831458	0.182	0.103	1.38E-12	6
ATP5MC1	2.62E-17	0.9840453997	0.252	0.165	1.48E-12	6
FRMD4A	2.66E-17	0.6339034992	0.358	0.248	1.50E-12	6
DCTN1	3.02E-17	0.6786588514	0.318	0.215	1.71E-12	6
SLC39A13	3.32E-17	0.8472884789	0.234	0.143	1.88E-12	6
MRPL54	3.42E-17	0.5045941193	0.452	0.342	1.94E-12	6
TCEAL9	3.50E-17	0.7390436205	0.294	0.2	1.98E-12	6
NPM3	3.54E-17	0.8502055178	0.189	0.108	2.01E-12	6
SAE1	3.75E-17	0.7004835908	0.295	0.196	2.12E-12	6
WDR34	3.77E-17	0.9921392215	0.188	0.107	2.14E-12	6
PSMD10	4.04E-17	0.7197832587	0.244	0.151	2.29E-12	6
XPO6	4.75E-17	0.9683635848	0.144	0.074	2.69E-12	6
FIBP	5.11E-17	0.5792819619	0.42	0.313	2.89E-12	6
CHST1	5.24E-17	1.148958229	0.151	0.081	2.97E-12	6
TMEM208	5.35E-17	0.5127750607	0.407	0.293	3.03E-12	6
RBFOX2	5.57E-17	0.6972229523	0.352	0.247	3.16E-12	6
PLPP2	6.31E-17	1.001622717	0.208	0.125	3.57E-12	6
BAG6	6.38E-17	0.5854805855	0.379	0.271	3.61E-12	6
NBEAL2	6.83E-17	1.150090974	0.129	0.064	3.87E-12	6
DYRK4	8.35E-17	0.8701589717	0.201	0.118	4.73E-12	6
PLEKHJ1	9.02E-17	0.8578115675	0.2	0.118	5.11E-12	6
NDUFAF3	9.22E-17	0.5071708532	0.559	0.45	5.22E-12	6
S100A2	1.07E-16	1.114853444	0.147	0.078	6.08E-12	6
TMEM263	1.26E-16	0.6769400814	0.287	0.19	7.12E-12	6
DEXI	1.31E-16	1.093658879	0.148	0.079	7.43E-12	6
NBDY	1.35E-16	0.968600484	0.266	0.18	7.63E-12	6
PSMD14	1.36E-16	0.6677513475	0.337	0.238	7.72E-12	6
SMARCC1	1.42E-16	0.5673890007	0.295	0.195	8.02E-12	6
AFAP1L1	1.44E-16	0.7720463598	0.274	0.181	8.13E-12	6
TNC	1.57E-16	1.059965071	0.109	0.051	8.89E-12	6
ABHD17A	1.61E-16	0.6054833526	0.373	0.266	9.11E-12	6
TXNDC9	1.69E-16	0.6438878944	0.329	0.228	9.56E-12	6
SMARCA4	1.74E-16	0.5702122251	0.353	0.248	9.87E-12	6
SMCO4	1.82E-16	0.7958492785	0.222	0.136	1.03E-11	6
TWSG1	1.84E-16	0.7760323383	0.248	0.157	1.04E-11	6
HIST1H1C	1.85E-16	1.177722227	0.16	0.088	1.05E-11	6
MRPL47	2.32E-16	0.5793061103	0.372	0.267	1.31E-11	6
ARPC4	2.55E-16	0.5123207257	0.409	0.299	1.44E-11	6
ARSA	2.63E-16	0.9352723464	0.17	0.094	1.49E-11	6
PFDN6	2.67E-16	0.7175072363	0.281	0.188	1.51E-11	6
SHMT2	2.77E-16	0.7964244138	0.192	0.111	1.57E-11	6
TP53	2.94E-16	0.7322656401	0.253	0.164	1.66E-11	6
LARP1	3.10E-16	0.5493213634	0.346	0.242	1.76E-11	6
GNA12	3.45E-16	0.9997470848	0.168	0.095	1.96E-11	6
TP53INP2	4.06E-16	0.9854702926	0.142	0.075	2.30E-11	6
GCN1	4.21E-16	0.9726096557	0.141	0.074	2.39E-11	6
PAFAH1B2	4.88E-16	0.5214628786	0.401	0.293	2.76E-11	6
MAPRE2	5.06E-16	0.6049428472	0.325	0.225	2.87E-11	6
ZC3H7B	5.73E-16	0.8348627647	0.188	0.11	3.24E-11	6
MAPK1	5.95E-16	0.6300741632	0.301	0.206	3.37E-11	6
TNIP2	5.95E-16	0.5822663993	0.446	0.343	3.37E-11	6
SNRNP200	5.97E-16	0.6770525895	0.356	0.256	3.38E-11	6
RNPEPL1	6.02E-16	0.702611558	0.259	0.169	3.41E-11	6
SLC9A3R21	6.05E-16	0.5794025641	0.385	0.281	3.42E-11	6
TMEM141	6.15E-16	0.5364873069	0.391	0.288	3.48E-11	6
DLGAP4	6.71E-16	0.5672032248	0.311	0.211	3.80E-11	6
REEP3	6.74E-16	0.5966364461	0.357	0.255	3.82E-11	6
INTS1	6.89E-16	0.9105581827	0.179	0.104	3.90E-11	6
PDXK	7.04E-16	0.9372386656	0.187	0.11	3.99E-11	6
TSPAN17	7.19E-16	0.831601205	0.194	0.114	4.07E-11	6
SEMA6B	7.40E-16	0.6309368178	0.359	0.259	4.19E-11	6
HOMER3	8.69E-16	1.113226812	0.142	0.076	4.92E-11	6
ZNF358	9.34E-16	0.7991929717	0.223	0.139	5.29E-11	6
RARRES2	1.00E-15	1.627134312	0.117	0.058	5.68E-11	6
PGP	1.08E-15	0.8230008834	0.168	0.095	6.11E-11	6
MPDU1	1.10E-15	0.6976911587	0.272	0.181	6.24E-11	6
TIMM17A	1.15E-15	0.6186442335	0.355	0.253	6.49E-11	6
CSGALNACT1	1.17E-15	0.5662468382	0.362	0.26	6.60E-11	6
HOXD9	1.49E-15	0.7400762876	0.319	0.226	8.45E-11	6
MRPL28	1.84E-15	0.6080163375	0.36	0.258	1.04E-10	6
GPX8	1.86E-15	0.6690378672	0.217	0.132	1.05E-10	6
ARHGAP18	1.98E-15	0.822253543	0.282	0.193	1.12E-10	6
UBXN6	2.01E-15	0.6349317955	0.269	0.178	1.14E-10	6
TRIR	2.12E-15	0.647305352	0.352	0.256	1.20E-10	6
MCRIP1	2.33E-15	1.03280761	0.196	0.121	1.32E-10	6
TBC1D2B	2.55E-15	0.891035866	0.193	0.117	1.44E-10	6
HN1	2.64E-15	0.5824499153	0.306	0.211	1.50E-10	6
PPP1R9B	2.75E-15	0.6195313242	0.257	0.166	1.56E-10	6
GOLGA3	2.80E-15	0.7164083408	0.24	0.153	1.58E-10	6
TMEM51	2.83E-15	1.242649569	0.1	0.046	1.60E-10	6
GOLT1B	2.84E-15	0.7064074036	0.266	0.176	1.61E-10	6
WDR18	2.88E-15	0.7732503853	0.238	0.152	1.63E-10	6
SIN3B1	2.89E-15	0.5934834332	0.237	0.151	1.64E-10	6
HERC1	3.10E-15	0.564977679	0.333	0.234	1.75E-10	6
NACC1	3.22E-15	1.121067732	0.119	0.06	1.82E-10	6
EMC8	3.55E-15	0.6096424549	0.274	0.183	2.01E-10	6
TSR3	3.59E-15	0.7559444895	0.216	0.135	2.03E-10	6
CSTF3	3.64E-15	0.9590649897	0.135	0.071	2.06E-10	6
PPP2CB	3.67E-15	0.5002548473	0.331	0.233	2.08E-10	6
PIN4	3.73E-15	0.6441276521	0.35	0.252	2.11E-10	6
GPR180	4.01E-15	1.164180394	0.114	0.057	2.27E-10	6
PSMG4	4.13E-15	0.6060176091	0.368	0.272	2.34E-10	6
WDR77	4.21E-15	0.8133549072	0.164	0.093	2.38E-10	6
CUBN	4.25E-15	1.046597296	0.103	0.048	2.41E-10	6
MSL3	4.43E-15	0.6317643243	0.311	0.215	2.51E-10	6
KIAA2013	4.55E-15	0.7605586305	0.199	0.121	2.58E-10	6
ADD3	4.68E-15	0.574905871	0.278	0.186	2.65E-10	6
TRAF3	4.93E-15	0.9005337109	0.142	0.076	2.79E-10	6
ATP6V0D1	5.61E-15	0.5021469628	0.394	0.289	3.18E-10	6
PLXNB2	6.00E-15	0.6198016697	0.312	0.217	3.40E-10	6
NCLN	6.80E-15	0.7655650774	0.19	0.114	3.85E-10	6
ANAPC15	6.85E-15	0.7430443751	0.214	0.134	3.88E-10	6
BLOC1S1	7.14E-15	0.590968536	0.328	0.234	4.04E-10	6
ETV5	7.23E-15	0.7892521376	0.146	0.079	4.09E-10	6
CTBP1	8.16E-15	0.7204477618	0.234	0.152	4.62E-10	6
NPLOC4	8.30E-15	0.7138353844	0.212	0.131	4.70E-10	6
DHCR24	1.07E-14	1.094989975	0.109	0.053	6.05E-10	6
CLPTM1L	1.14E-14	0.712508518	0.22	0.139	6.44E-10	6
POLR3H	1.15E-14	0.9380890149	0.129	0.068	6.50E-10	6
GLG1	1.19E-14	0.5609661483	0.426	0.329	6.75E-10	6
SLC4A7	1.21E-14	0.5384627606	0.294	0.201	6.87E-10	6
PNKP	1.31E-14	0.5761688083	0.286	0.193	7.42E-10	6
ALDH18A1	1.43E-14	1.082174766	0.114	0.057	8.10E-10	6
CDA	1.47E-14	0.6225150387	0.215	0.132	8.30E-10	6
AP3D1	1.49E-14	0.5469178906	0.268	0.179	8.45E-10	6
HRAS	1.55E-14	0.8821726072	0.212	0.134	8.79E-10	6
IARS	1.82E-14	0.6743127678	0.232	0.15	1.03E-09	6
ZBTB46	1.94E-14	0.9485924118	0.122	0.063	1.10E-09	6
KIF1C	1.96E-14	0.6847252754	0.286	0.198	1.11E-09	6
MYO5A	1.96E-14	0.6308078113	0.298	0.206	1.11E-09	6
CMTM3	1.97E-14	0.633072442	0.275	0.184	1.11E-09	6
DPP3	2.22E-14	0.8404783223	0.135	0.072	1.26E-09	6
ACSL4	2.23E-14	0.6270747471	0.26	0.173	1.27E-09	6
PCSK7	2.25E-14	0.5884967572	0.283	0.192	1.27E-09	6
CDC42BPB	2.36E-14	0.5330877581	0.405	0.304	1.34E-09	6
C1QTNF6	2.53E-14	1.002685107	0.115	0.058	1.44E-09	6
NAGK	2.76E-14	0.6236466463	0.279	0.19	1.56E-09	6
FAM89B	2.97E-14	0.6154414705	0.272	0.184	1.68E-09	6
CCZ1	3.06E-14	0.6555052319	0.175	0.103	1.73E-09	6
SLC35B4	3.21E-14	0.9449315072	0.129	0.068	1.82E-09	6
IRGQ	3.35E-14	0.8628944315	0.118	0.06	1.90E-09	6
KDM5B	3.81E-14	0.5988625861	0.292	0.201	2.16E-09	6
MBD2	3.83E-14	0.6568024926	0.269	0.182	2.17E-09	6
B4GALT2	4.06E-14	0.9179858412	0.127	0.067	2.30E-09	6
DHX30	4.14E-14	0.6371160397	0.312	0.222	2.34E-09	6
COMMD5	4.37E-14	0.6600665678	0.202	0.125	2.47E-09	6
SLC39A3	4.44E-14	0.9017672279	0.161	0.094	2.51E-09	6
AGRN	4.49E-14	0.5821937601	0.257	0.17	2.54E-09	6
GALK1	4.52E-14	0.8016607597	0.217	0.138	2.56E-09	6
TMEM214	4.98E-14	0.7926041215	0.208	0.131	2.82E-09	6
HGS	4.99E-14	0.6393449931	0.29	0.2	2.83E-09	6
RHBDD3	5.02E-14	0.9352500279	0.134	0.073	2.84E-09	6
VOPP1	5.43E-14	0.5208591026	0.344	0.247	3.08E-09	6
SIL1	5.73E-14	0.6353435271	0.27	0.182	3.24E-09	6
EXOG	5.87E-14	1.014295579	0.126	0.067	3.33E-09	6
OGA1	5.97E-14	0.8913703126	0.19	0.119	3.38E-09	6
EIF1AY	6.04E-14	0.6286826909	0.181	0.107	3.42E-09	6
GYS1	6.40E-14	0.9176616452	0.1	0.048	3.62E-09	6
CTDNEP1	6.54E-14	0.6400550535	0.327	0.236	3.70E-09	6
ACTR1A	6.64E-14	0.5250206965	0.404	0.305	3.76E-09	6
PTPMT1	6.67E-14	0.6011429685	0.257	0.17	3.78E-09	6
TUBG1	6.70E-14	0.6791113911	0.241	0.158	3.79E-09	6
AIMP2	7.21E-14	0.7408607018	0.217	0.138	4.08E-09	6
MDH1	7.49E-14	0.5428776092	0.357	0.261	4.24E-09	6
PTPN14	7.64E-14	0.5008255531	0.315	0.222	4.33E-09	6
KIAA0930	7.98E-14	1.049559002	0.135	0.074	4.52E-09	6
CPNE2	8.04E-14	0.6104443349	0.272	0.186	4.55E-09	6
PRRC1	8.31E-14	0.6895385164	0.242	0.159	4.70E-09	6
TIA1	8.59E-14	0.5516695751	0.292	0.202	4.86E-09	6
TCTEX1D2	8.76E-14	0.9435536664	0.132	0.071	4.96E-09	6
SAC3D1	9.37E-14	1.107346229	0.106	0.053	5.30E-09	6
PHC2	1.01E-13	0.5305592823	0.277	0.189	5.70E-09	6
GIPC1	1.05E-13	0.673266541	0.224	0.145	5.96E-09	6
PYGB	1.20E-13	0.8675230566	0.147	0.083	6.78E-09	6
GPAT4	1.29E-13	0.7717588039	0.225	0.147	7.30E-09	6
SSBP4	1.30E-13	0.5981881379	0.32	0.23	7.36E-09	6
AGFG1	1.32E-13	0.6436734596	0.211	0.134	7.50E-09	6
RTL8C	1.39E-13	1.014204349	0.179	0.112	7.85E-09	6
PRR5	1.48E-13	0.810178558	0.156	0.09	8.36E-09	6
TMEM54	1.59E-13	0.6322911486	0.26	0.174	9.03E-09	6
TMED1	1.69E-13	0.681847359	0.273	0.19	9.54E-09	6
ATP13A2	1.72E-13	0.830500336	0.155	0.089	9.76E-09	6
DHX9	1.73E-13	0.5412097527	0.353	0.264	9.78E-09	6
GNPNAT1	1.78E-13	0.7492090571	0.156	0.09	1.01E-08	6
FASTK	1.88E-13	0.7085329644	0.242	0.161	1.06E-08	6
MARS	1.90E-13	0.7958556578	0.19	0.118	1.07E-08	6
CNN2	1.91E-13	0.589317972	0.278	0.189	1.08E-08	6
PTGES2	2.09E-13	0.7197049207	0.217	0.138	1.18E-08	6
REX1BD	2.30E-13	0.8859756089	0.244	0.168	1.30E-08	6
DFFA	2.36E-13	0.5772298908	0.348	0.255	1.34E-08	6
GTF3C1	2.55E-13	0.7088872848	0.211	0.134	1.44E-08	6
CETN2	2.57E-13	0.7632827281	0.225	0.148	1.46E-08	6
IGHA1	2.59E-13	1.508396287	0.106	0.056	1.47E-08	6
CPPED1	2.86E-13	0.7507566985	0.194	0.122	1.62E-08	6
KDM5C	3.38E-13	0.6871686375	0.222	0.143	1.92E-08	6
RNF187	3.52E-13	0.6130715029	0.328	0.239	1.99E-08	6
RHBDF2	3.73E-13	0.9685514949	0.119	0.064	2.11E-08	6
DNMT3A	5.26E-13	0.8587245682	0.165	0.099	2.98E-08	6
CNPY3	5.36E-13	0.5493248565	0.361	0.27	3.03E-08	6
KDM3B	5.38E-13	0.844439786	0.174	0.106	3.04E-08	6
PGM2	5.45E-13	0.6120821774	0.313	0.226	3.09E-08	6
DGKZ	5.49E-13	0.6097487564	0.283	0.2	3.11E-08	6
FLT4	5.53E-13	0.6393282266	0.174	0.104	3.13E-08	6
NRSN2	5.64E-13	0.9245877785	0.12	0.064	3.20E-08	6
HIGD1A	6.02E-13	0.5286228794	0.214	0.137	3.41E-08	6
CARM1	6.23E-13	0.8375381558	0.159	0.095	3.53E-08	6
USP48	6.73E-13	0.5080825197	0.287	0.201	3.81E-08	6
DPY19L1	7.10E-13	0.7873906402	0.183	0.114	4.02E-08	6
POGLUT1	7.68E-13	0.6766105956	0.253	0.172	4.35E-08	6
WIPF1	8.20E-13	0.5256482924	0.265	0.18	4.64E-08	6
EIF2AK1	9.34E-13	0.5871136471	0.26	0.179	5.29E-08	6
AP1M1	9.38E-13	0.7122221384	0.234	0.157	5.31E-08	6
TIMM50	9.72E-13	0.5613628494	0.263	0.179	5.50E-08	6
AARS	1.00E-12	0.821508954	0.208	0.136	5.67E-08	6
ATP5PD	1.06E-12	0.7025376473	0.276	0.197	6.01E-08	6
TAOK2	1.07E-12	0.5444757447	0.307	0.218	6.05E-08	6
ADAMTSL1	1.09E-12	0.6999636445	0.124	0.067	6.15E-08	6
SRPRB	1.09E-12	0.6707626709	0.259	0.178	6.16E-08	6
PDZD11	1.10E-12	0.6139895635	0.259	0.177	6.23E-08	6
ZDHHC8	1.16E-12	0.7074076118	0.168	0.102	6.57E-08	6
KLF13	1.31E-12	0.5656727729	0.269	0.187	7.41E-08	6
UGGT1	1.32E-12	0.8733395536	0.183	0.115	7.45E-08	6
SLC35B1	1.34E-12	0.6497730304	0.29	0.207	7.60E-08	6
GRAP	1.42E-12	0.7714248407	0.111	0.058	8.06E-08	6
ATAD3A	1.43E-12	1.039196646	0.114	0.061	8.09E-08	6
DAZAP1	1.47E-12	0.5234025136	0.328	0.238	8.31E-08	6
EVA1B	1.48E-12	0.6602063709	0.256	0.177	8.35E-08	6
PPIL1	1.60E-12	0.8737701763	0.126	0.069	9.06E-08	6
ARHGAP35	1.67E-12	0.8346259052	0.176	0.11	9.44E-08	6
COMMD4	1.67E-12	0.5065071688	0.364	0.273	9.48E-08	6
CAPN1	1.72E-12	0.5921383799	0.307	0.22	9.75E-08	6
TCF3	1.75E-12	0.8463823553	0.161	0.098	9.91E-08	6
PEAK1	1.87E-12	0.5981369771	0.273	0.19	1.06E-07	6
FAM214B	2.02E-12	0.6705492048	0.138	0.078	1.15E-07	6
IQCA1	2.05E-12	1.305002469	0.105	0.055	1.16E-07	6
XPNPEP1	2.11E-12	0.567162862	0.216	0.14	1.19E-07	6
RNF24	2.13E-12	0.7761614647	0.112	0.06	1.20E-07	6
USP5	2.25E-12	0.7922658929	0.145	0.084	1.27E-07	6
ARHGAP23	2.70E-12	0.5379131401	0.351	0.262	1.53E-07	6
JAZF1	2.72E-12	0.7651839566	0.15	0.088	1.54E-07	6
SPATC1L	2.88E-12	0.6261163421	0.18	0.111	1.63E-07	6
DTYMK	2.91E-12	0.5601650001	0.254	0.173	1.65E-07	6
MYCBP	3.10E-12	0.5960938239	0.156	0.092	1.75E-07	6
MRPS14	3.42E-12	0.5975026824	0.265	0.184	1.94E-07	6
CKAP4	3.52E-12	0.5654323774	0.283	0.202	1.99E-07	6
IMPDH1	3.61E-12	0.6578897378	0.238	0.161	2.05E-07	6
INO80C	3.71E-12	0.6058526955	0.29	0.207	2.10E-07	6
BAP1	3.73E-12	0.719525006	0.168	0.102	2.11E-07	6
FDFT1	3.78E-12	0.6307618214	0.341	0.257	2.14E-07	6
SELL	3.88E-12	0.7396892461	0.203	0.132	2.20E-07	6
EIF4G3	3.94E-12	0.5298189132	0.322	0.238	2.23E-07	6
NES	4.13E-12	0.5757121193	0.229	0.153	2.34E-07	6
GEMIN7	4.49E-12	0.9920881445	0.122	0.068	2.54E-07	6
APBA3	4.56E-12	0.644990217	0.135	0.076	2.58E-07	6
RTL8A	4.58E-12	1.133686471	0.156	0.096	2.60E-07	6
MRGBP	4.87E-12	1.001605655	0.103	0.054	2.76E-07	6
ATP13A1	4.90E-12	0.7911421336	0.147	0.086	2.77E-07	6
RC3H2	5.21E-12	0.5751246362	0.249	0.17	2.95E-07	6
HTT	5.66E-12	0.6686447714	0.182	0.114	3.21E-07	6
ALG1	5.78E-12	0.9959859766	0.123	0.068	3.27E-07	6
POLD2	5.83E-12	0.6061926525	0.254	0.174	3.30E-07	6
POP7	6.04E-12	0.6447316436	0.242	0.166	3.42E-07	6
NOL4L	6.16E-12	0.5515414075	0.269	0.188	3.49E-07	6
SEC24C	6.59E-12	0.6970192516	0.158	0.095	3.73E-07	6
WSB2	7.00E-12	0.6975625975	0.165	0.101	3.97E-07	6
NRAS	7.04E-12	0.517793457	0.274	0.192	3.99E-07	6
UBFD1	7.15E-12	0.9618053651	0.124	0.07	4.05E-07	6
SNRNP35	7.23E-12	0.8090296223	0.167	0.104	4.10E-07	6
MAGOHB	7.63E-12	0.7000160819	0.198	0.129	4.32E-07	6
MRPL35	7.66E-12	0.9170240252	0.154	0.094	4.34E-07	6
MFSD12	7.93E-12	0.9831887892	0.134	0.077	4.49E-07	6
EVI5	7.94E-12	0.6143593497	0.215	0.142	4.50E-07	6
PDGFA	8.63E-12	0.971039214	0.106	0.056	4.89E-07	6
APOPT1	8.74E-12	0.7144862506	0.178	0.111	4.95E-07	6
ASAP2	8.74E-12	0.5908811713	0.209	0.137	4.95E-07	6
WWC2	8.98E-12	0.5638566555	0.223	0.149	5.08E-07	6
CDC34	9.59E-12	0.778660453	0.194	0.127	5.43E-07	6
DESI1	1.00E-11	0.5796703325	0.229	0.155	5.68E-07	6
KIF26A	1.04E-11	0.7436458883	0.134	0.077	5.88E-07	6
PLIN3	1.08E-11	0.5222893861	0.272	0.192	6.14E-07	6
TEN1	1.09E-11	1.051644303	0.105	0.056	6.15E-07	6
FAM234A	1.09E-11	0.849290508	0.217	0.147	6.17E-07	6
TBC1D22B	1.11E-11	0.978590051	0.101	0.053	6.26E-07	6
PQLC1	1.18E-11	0.5851260958	0.193	0.124	6.65E-07	6
NSMF	1.23E-11	0.897553345	0.138	0.081	6.96E-07	6
LYL1	1.33E-11	0.6925095004	0.246	0.172	7.51E-07	6
HMBS	1.44E-11	1.085961809	0.101	0.054	8.16E-07	6
GBE1	1.46E-11	0.5511631261	0.202	0.132	8.26E-07	6
UBE2J2	1.55E-11	0.5366989716	0.285	0.203	8.79E-07	6
ZDHHC4	1.65E-11	0.8936437742	0.105	0.056	9.35E-07	6
TAGLN	1.71E-11	1.606871509	0.21	0.143	9.67E-07	6
C3orf14	1.72E-11	0.6427689062	0.157	0.095	9.71E-07	6
UBE2M	1.88E-11	0.6773285909	0.217	0.146	1.06E-06	6
CAPG	1.94E-11	0.572631706	0.232	0.158	1.10E-06	6
INF2	2.00E-11	0.5702907492	0.266	0.188	1.14E-06	6
MSRB1	2.06E-11	0.7314620194	0.146	0.087	1.17E-06	6
WDR6	2.15E-11	0.7383234214	0.214	0.144	1.22E-06	6
SMIM13	2.19E-11	0.8970134097	0.12	0.068	1.24E-06	6
MEF2D	2.27E-11	0.5586518513	0.212	0.14	1.29E-06	6
TSPAN5	2.31E-11	0.6426441931	0.115	0.063	1.31E-06	6
KCTD10	2.44E-11	0.5403359435	0.273	0.193	1.38E-06	6
ALDH16A1	2.63E-11	0.5603980576	0.245	0.171	1.49E-06	6
RRP36	2.65E-11	0.8655077138	0.167	0.104	1.50E-06	6
RABIF	2.94E-11	0.7016076486	0.178	0.114	1.66E-06	6
VSIR	3.57E-11	1.025654812	0.147	0.092	2.02E-06	6
AGAP2-AS1	3.69E-11	0.7102608051	0.178	0.113	2.09E-06	6
GATAD2A	3.77E-11	0.5648459018	0.251	0.176	2.13E-06	6
TUBGCP2	3.85E-11	0.6168223573	0.231	0.158	2.18E-06	6
SLC35B2	4.39E-11	0.6867821942	0.121	0.068	2.49E-06	6
FAM171B	4.52E-11	0.7250158652	0.194	0.128	2.56E-06	6
PTPA	4.60E-11	0.9812699278	0.135	0.082	2.61E-06	6
FAHD1	4.92E-11	0.7294300288	0.149	0.09	2.79E-06	6
ZSWIM4	5.02E-11	0.7256080455	0.123	0.07	2.84E-06	6
TRAK1	5.02E-11	0.8268930049	0.137	0.081	2.85E-06	6
ATP5J2	5.23E-11	0.6068686859	0.374	0.303	2.96E-06	6
E2F3	5.51E-11	0.7866554802	0.124	0.072	3.12E-06	6
AGAP31	5.72E-11	0.7090854901	0.202	0.135	3.24E-06	6
DCUN1D5	5.90E-11	0.5213142346	0.261	0.185	3.34E-06	6
SLC4A2	6.05E-11	0.6374951911	0.173	0.11	3.42E-06	6
ERO1A	6.71E-11	0.5989061841	0.268	0.191	3.80E-06	6
SMIM30	6.92E-11	0.9538874002	0.153	0.096	3.92E-06	6
ICMT	7.09E-11	0.5417214013	0.256	0.179	4.01E-06	6
SNX8	7.32E-11	0.71696378	0.129	0.075	4.15E-06	6
SRGAP2	7.53E-11	0.5064877014	0.289	0.21	4.26E-06	6
CHCHD5	7.54E-11	0.5330858082	0.362	0.281	4.27E-06	6
RAP2B	7.59E-11	0.7060147201	0.185	0.121	4.30E-06	6
TEAD4	7.64E-11	0.5017076594	0.277	0.199	4.33E-06	6
SPNS1	7.74E-11	0.5450673857	0.272	0.196	4.38E-06	6
TRIP6	7.77E-11	0.6780035762	0.146	0.088	4.40E-06	6
GLB1	8.45E-11	0.6249273158	0.188	0.123	4.78E-06	6
CXCL11	8.53E-11	0.7355406532	0.104	0.057	4.83E-06	6
CIAPIN1	8.89E-11	0.5479443359	0.237	0.164	5.03E-06	6
B9D2	9.45E-11	0.5645939822	0.126	0.073	5.35E-06	6
ZDHHC24	9.59E-11	0.5325547303	0.339	0.256	5.43E-06	6
ANKRD50	1.00E-10	0.6305474671	0.214	0.146	5.67E-06	6
NUAK2	1.00E-10	0.5351210072	0.137	0.081	5.69E-06	6
TPGS2	1.01E-10	0.5442333598	0.276	0.2	5.71E-06	6
LSM10	1.09E-10	0.5893920854	0.222	0.153	6.20E-06	6
USB1	1.12E-10	0.5559234367	0.208	0.139	6.34E-06	6
TMTC4	1.13E-10	0.7322966463	0.115	0.065	6.40E-06	6
CSNK2A1	1.16E-10	0.5151250946	0.311	0.234	6.55E-06	6
NAV2	1.17E-10	0.6095716969	0.147	0.089	6.64E-06	6
DPP9	1.23E-10	0.6551259496	0.172	0.11	6.97E-06	6
MAPKAPK5-AS1	1.26E-10	0.5907058924	0.272	0.196	7.12E-06	6
TACO1	1.29E-10	0.7435296528	0.125	0.073	7.30E-06	6
CAMKK2	1.31E-10	0.7286795418	0.204	0.138	7.42E-06	6
PTP4A3	1.34E-10	0.5480229384	0.184	0.118	7.60E-06	6
NMRAL1	1.39E-10	0.7224093747	0.181	0.118	7.86E-06	6
UQCC3	1.39E-10	0.6052185494	0.248	0.177	7.90E-06	6
PSME41	1.40E-10	0.5624479331	0.203	0.135	7.95E-06	6
MAGEF1	1.41E-10	0.6927522802	0.16	0.1	8.01E-06	6
TP53RK	1.47E-10	0.6269501499	0.158	0.098	8.30E-06	6
SPPL3	1.47E-10	0.5073726703	0.232	0.161	8.31E-06	6
NUBP2	1.48E-10	0.527938147	0.295	0.218	8.38E-06	6
TBC1D16	1.53E-10	0.8169080992	0.115	0.066	8.66E-06	6
IDH1	1.54E-10	0.638200575	0.194	0.129	8.72E-06	6
SLC41A11	1.56E-10	0.5430642025	0.238	0.166	8.85E-06	6
ARFGAP1	1.57E-10	0.8206688815	0.139	0.085	8.89E-06	6
CPSF1	1.58E-10	0.7883254281	0.153	0.095	8.96E-06	6
KIAA0100	1.60E-10	0.5625547867	0.176	0.112	9.07E-06	6
PITPNA	1.63E-10	0.5504640928	0.229	0.159	9.21E-06	6
ANKRD52	1.71E-10	0.8928472053	0.104	0.058	9.66E-06	6
ATP5PB	1.75E-10	0.6439743261	0.237	0.171	9.90E-06	6
GLRX5	1.78E-10	0.6362229288	0.268	0.197	1.01E-05	6
ATP5PO	1.80E-10	0.6588342403	0.248	0.18	1.02E-05	6
TIMM10B	1.85E-10	0.7920954409	0.148	0.092	1.05E-05	6
SELENOT	1.90E-10	0.8691178371	0.188	0.128	1.08E-05	6
UFD1	1.99E-10	0.8847345649	0.178	0.119	1.12E-05	6
11-9월	2.06E-10	0.5378750559	0.261	0.186	1.17E-05	6
HDAC5	2.23E-10	0.5380264127	0.219	0.148	1.26E-05	6
MRPL44	2.25E-10	0.582276814	0.173	0.111	1.28E-05	6
ZSCAN16-AS1	2.31E-10	0.9376956643	0.122	0.072	1.31E-05	6
B3GALT6	2.36E-10	0.8677450728	0.112	0.064	1.34E-05	6
TTC14	2.54E-10	0.5135935531	0.264	0.19	1.44E-05	6
TMEM223	2.57E-10	0.5708891444	0.231	0.161	1.45E-05	6
CNPY4	2.66E-10	0.7223693515	0.161	0.103	1.51E-05	6
NELFB	2.73E-10	0.750674228	0.17	0.11	1.55E-05	6
NDUFV3	2.79E-10	0.5257167188	0.252	0.18	1.58E-05	6
KIAA1462	2.87E-10	0.5655857564	0.208	0.14	1.62E-05	6
NDUFAF8	3.05E-10	0.9360558553	0.157	0.101	1.73E-05	6
SLC35F2	3.15E-10	0.7013017906	0.168	0.109	1.79E-05	6
CLSTN1	3.24E-10	0.6264378372	0.289	0.216	1.83E-05	6
CAB39	3.31E-10	0.6454163938	0.212	0.146	1.87E-05	6
CD44	3.45E-10	0.7757009794	0.115	0.066	1.95E-05	6
SH3BP2	3.64E-10	0.5610133617	0.238	0.168	2.06E-05	6
RAB12	3.79E-10	0.662799835	0.122	0.071	2.15E-05	6
MED11	3.92E-10	0.768270248	0.132	0.079	2.22E-05	6
DPCD	3.93E-10	0.8635186547	0.121	0.071	2.23E-05	6
MED15	4.08E-10	0.5396077643	0.282	0.207	2.31E-05	6
MECR	4.15E-10	0.8226667594	0.126	0.075	2.35E-05	6
MTHFD1L	4.18E-10	0.8363611115	0.142	0.088	2.37E-05	6
SLC38A10	4.51E-10	0.5000769471	0.248	0.176	2.55E-05	6
SCAMP5	4.54E-10	0.8321564498	0.122	0.072	2.57E-05	6
HIST1H1E	4.58E-10	1.021736616	0.129	0.078	2.60E-05	6
IMPAD1	4.76E-10	0.541240037	0.222	0.154	2.70E-05	6
RAP1GDS1	4.76E-10	0.5483078085	0.198	0.132	2.70E-05	6
KAZN	4.79E-10	0.734200837	0.186	0.124	2.71E-05	6
APOL2	4.82E-10	0.7211437923	0.151	0.095	2.73E-05	6
CAND1	4.85E-10	0.5477502013	0.334	0.261	2.75E-05	6
POLRMT	4.96E-10	0.7021413845	0.13	0.078	2.81E-05	6
ZNF532	5.08E-10	0.5577907957	0.155	0.098	2.88E-05	6
TRIM37	5.20E-10	0.6287339182	0.15	0.094	2.94E-05	6
CARMIL1	5.40E-10	1.252233046	0.113	0.067	3.06E-05	6
BABAM1	5.43E-10	0.5229969837	0.246	0.175	3.07E-05	6
DDX1	5.45E-10	0.5410467845	0.301	0.226	3.09E-05	6
DGAT1	5.46E-10	0.7008296883	0.216	0.149	3.09E-05	6
ARHGAP24	6.34E-10	0.8676972932	0.102	0.057	3.59E-05	6
EFTUD2	6.39E-10	0.6333900584	0.211	0.145	3.62E-05	6
ZNF688	6.43E-10	0.9556154118	0.123	0.074	3.64E-05	6
SH3RF3	6.56E-10	0.7488914865	0.119	0.07	3.71E-05	6
ATAD3B	6.62E-10	0.8914786582	0.113	0.066	3.75E-05	6
SMUG1	6.70E-10	0.9590412424	0.106	0.06	3.80E-05	6
OGDH	6.71E-10	0.5336317949	0.21	0.143	3.80E-05	6
EML3	6.90E-10	0.5437053598	0.274	0.2	3.91E-05	6
ANKRD65	6.92E-10	0.6752640986	0.234	0.166	3.92E-05	6
ALG2	7.23E-10	0.7137823474	0.212	0.147	4.10E-05	6
PLCG1	7.86E-10	0.5878705115	0.222	0.155	4.45E-05	6
FCHO1	8.61E-10	0.816480874	0.111	0.064	4.87E-05	6
RABEP2	8.62E-10	0.7062471578	0.164	0.106	4.88E-05	6
SERINC2	9.07E-10	0.6955592954	0.185	0.124	5.14E-05	6
RNPEP	9.60E-10	0.5906875806	0.223	0.156	5.44E-05	6
ATP5F1C	9.79E-10	0.6434208192	0.26	0.196	5.54E-05	6
COMMD3	1.07E-09	0.7492298167	0.161	0.105	6.06E-05	6
CSK	1.12E-09	0.7908016826	0.131	0.08	6.35E-05	6
TRIAP1	1.15E-09	0.5735877756	0.259	0.189	6.49E-05	6
PDCD11	1.17E-09	0.9750081081	0.134	0.083	6.62E-05	6
THOP1	1.18E-09	0.771333803	0.11	0.063	6.68E-05	6
TMEM185A	1.28E-09	0.7132131384	0.124	0.074	7.25E-05	6
RARS	1.39E-09	0.6099162024	0.257	0.188	7.89E-05	6
FAM160B1	1.43E-09	0.6218253217	0.201	0.138	8.11E-05	6
BMS1	1.43E-09	0.5827002778	0.212	0.147	8.11E-05	6
MMAB	1.44E-09	0.7009468302	0.199	0.137	8.16E-05	6
CRYZ	1.56E-09	0.7745482165	0.101	0.057	8.86E-05	6
CSNK2A2	1.67E-09	0.6357391679	0.185	0.125	9.43E-05	6
C11orf95	2.03E-09	0.7111474089	0.106	0.061	0.000114821549	6
FKBP7	2.04E-09	0.5382854732	0.192	0.129	0.0001155286641	6
DDAH1	2.21E-09	0.7288883399	0.143	0.09	0.0001250628209	6
TELO2	2.21E-09	0.6517634104	0.141	0.088	0.0001251458409	6
ITGA2	2.23E-09	0.5615611226	0.265	0.196	0.0001262046318	6
FRMD8	2.39E-09	0.6773791189	0.184	0.124	0.0001352887589	6
LRP6	2.43E-09	0.5651843898	0.199	0.137	0.0001378718676	6
JMJD8	2.54E-09	0.7011316902	0.187	0.127	0.0001435994366	6
TRMU	2.63E-09	0.7746873311	0.103	0.059	0.0001490702503	6
SLC50A1	2.78E-09	0.5411748321	0.245	0.177	0.0001576988895	6
EEF1E1	2.80E-09	0.6021419881	0.235	0.169	0.0001584545915	6
CYB561D2	2.81E-09	0.6811245187	0.114	0.067	0.0001590293625	6
TRAPPC5	2.96E-09	0.6523996411	0.305	0.238	0.0001675763145	6
NSD1	3.17E-09	0.6190038355	0.238	0.172	0.0001794861549	6
FLAD1	3.30E-09	0.5096145808	0.153	0.097	0.0001869046504	6
DOT1L	3.33E-09	0.8080859946	0.107	0.063	0.0001886109272	6
PDE8A	3.45E-09	0.5205361422	0.2	0.138	0.0001955609381	6
NEK6	3.47E-09	0.7012446483	0.115	0.068	0.0001966611932	6
PPP1R12C1	3.56E-09	0.5214211036	0.169	0.112	0.0002013286254	6
ATP5F1A	3.87E-09	0.6312396346	0.25	0.188	0.00021899866	6
GPR161	3.98E-09	0.984164719	0.101	0.058	0.0002256083052	6
EXOC7	4.08E-09	0.5304042588	0.254	0.186	0.0002308577836	6
FOCAD	4.15E-09	0.7833900283	0.105	0.061	0.0002352802515	6
SCAP	4.40E-09	0.5285888221	0.179	0.119	0.0002489122937	6
TBC1D7	4.41E-09	0.5998736168	0.139	0.087	0.0002494706265	6
FH	4.56E-09	0.5425545675	0.177	0.118	0.0002579646411	6
STK11	4.90E-09	0.6355783198	0.161	0.106	0.0002774372287	6
ZSWIM8	5.00E-09	0.7396962345	0.17	0.114	0.0002828592218	6
ANKRD9	5.73E-09	0.6618599148	0.117	0.07	0.000324639607	6
FTO	6.09E-09	0.6560899165	0.166	0.111	0.0003450909354	6
TSFM	6.37E-09	0.6667642252	0.153	0.101	0.0003606948618	6
DCPS	6.96E-09	0.5930212361	0.157	0.102	0.0003943077704	6
MMP24OS	7.41E-09	0.9582980122	0.115	0.071	0.0004193970515	6
ELP6	7.45E-09	0.5273279624	0.195	0.134	0.0004219873664	6
LETM1	7.55E-09	0.6286346195	0.161	0.107	0.0004274900548	6
SFXN1	7.66E-09	0.7484047558	0.113	0.068	0.0004339524339	6
ABCB8	7.87E-09	0.6533612808	0.103	0.059	0.0004455586579	6
B3GAT3	9.01E-09	0.5596849729	0.231	0.167	0.0005102782832	6
SLC7A6	9.19E-09	0.6574572489	0.143	0.092	0.0005204286855	6
XPO5	9.67E-09	0.8845868116	0.105	0.062	0.0005478182783	6
UNC45A	9.84E-09	0.5400949559	0.266	0.199	0.0005573207962	6
EDEM1	1.01E-08	0.5346218381	0.134	0.084	0.0005739869431	6
SEL1L3	1.03E-08	0.81440607	0.106	0.063	0.0005812412242	6
TMEM199	1.03E-08	0.6470432526	0.148	0.096	0.0005838892076	6
UBALD1	1.14E-08	0.561739103	0.177	0.12	0.0006461241967	6
LIPG	1.15E-08	0.9010512818	0.152	0.101	0.0006498151134	6
MROH1	1.16E-08	0.9745159959	0.112	0.068	0.0006577273639	6
SDHAF2	1.17E-08	0.5410049436	0.199	0.14	0.0006634295693	6
RPUSD3	1.19E-08	0.5856450991	0.146	0.094	0.0006723784802	6
ATG4A	1.24E-08	0.6320453572	0.158	0.105	0.0007005853411	6
NFE2L3	1.24E-08	0.6611534831	0.13	0.082	0.000704354233	6
ARFGAP2	1.31E-08	0.5942123448	0.197	0.138	0.0007397388198	6
ADAM9	1.32E-08	0.5954872576	0.171	0.116	0.0007488154086	6
CDKAL1	1.35E-08	0.9149817639	0.126	0.08	0.000765732011	6
SLC39A4	1.39E-08	0.567940793	0.19	0.132	0.0007873342103	6
TBRG4	1.49E-08	0.6919269253	0.141	0.091	0.0008431249866	6
CISD3	1.49E-08	0.5449599253	0.248	0.183	0.0008457467578	6
PSMG3	1.50E-08	0.6115468271	0.214	0.154	0.0008468640719	6
XPOT	1.57E-08	0.5281685507	0.165	0.11	0.0008891332426	6
CDK5	1.59E-08	0.5352474686	0.144	0.092	0.0008996164758	6
CLPX	1.65E-08	0.6262162762	0.175	0.119	0.0009357047635	6
EIF2B2	1.79E-08	0.5738892707	0.243	0.179	0.001011066867	6
RIN3	1.79E-08	0.695481178	0.126	0.078	0.001012141879	6
ESRRA	1.93E-08	0.6691329869	0.118	0.073	0.001092715872	6
TLE2	1.93E-08	0.7812574045	0.12	0.075	0.001092766777	6
GOT2	1.99E-08	0.5645413708	0.217	0.156	0.001126422424	6
RTRAF	2.03E-08	0.6082182449	0.27	0.211	0.001152049719	6
PIGBOS1	2.07E-08	0.7198646569	0.161	0.109	0.001173276288	6
UHRF1BP1L	2.09E-08	0.7971887493	0.102	0.06	0.001186354703	6
IREB2	2.12E-08	0.5224629394	0.196	0.137	0.001203148546	6
PHKG2	2.29E-08	0.7326190263	0.124	0.078	0.001296898243	6
PLD1	2.36E-08	0.7201224848	0.108	0.064	0.001337965934	6
TIMM17B	2.58E-08	0.5394782928	0.214	0.153	0.001461963281	6
TMEM39A	2.62E-08	0.7495937112	0.141	0.093	0.001486399485	6
OXLD1	2.72E-08	0.5965371264	0.181	0.125	0.001539376312	6
TRAM2	3.28E-08	0.5999671377	0.19	0.133	0.001856755241	6
BORCS8	3.32E-08	0.6815171815	0.12	0.075	0.001882507889	6
BID	3.41E-08	0.5321332145	0.3	0.234	0.001928256975	6
SIRT6	3.67E-08	0.5308992926	0.19	0.133	0.002075520336	6
ATXN1	3.92E-08	0.628376915	0.179	0.125	0.002219302109	6
MRPL23	3.97E-08	0.7036149846	0.124	0.078	0.002249662621	6
NLK	4.02E-08	0.6230980713	0.121	0.076	0.002279259716	6
PNMA1	4.07E-08	0.5458439636	0.138	0.089	0.002303156113	6
PCNA	4.31E-08	0.55951781	0.242	0.179	0.002440423877	6
YARS	4.40E-08	0.5124374836	0.217	0.156	0.002490827498	6
CLCN7	4.46E-08	0.7280783787	0.131	0.084	0.00252784704	6
FBXL7	4.55E-08	0.6195673301	0.162	0.111	0.002577218479	6
C11orf68	4.66E-08	0.8220614462	0.106	0.064	0.002637169945	6
LRRC16A	4.67E-08	0.5746666068	0.138	0.09	0.002644139856	6
CHFR	4.77E-08	0.7802289181	0.129	0.083	0.002702421926	6
TP53BP1	4.84E-08	0.5264254409	0.173	0.119	0.002740327534	6
SELENOF	4.93E-08	0.5574054332	0.248	0.19	0.002793670696	6
NF2	5.36E-08	0.5554984266	0.113	0.07	0.003036484642	6
GLYCTK	5.42E-08	0.8154733647	0.12	0.076	0.003068025694	6
DHRS4L2	5.49E-08	0.6200219183	0.182	0.129	0.003107834898	6
YEATS2	5.59E-08	0.6396324063	0.147	0.098	0.003165163657	6
RAP2A	5.64E-08	0.5231528239	0.152	0.102	0.003194831763	6
GAK	5.80E-08	0.5034154769	0.253	0.19	0.003285563881	6
HNRNPUL2	6.43E-08	0.55260739	0.195	0.139	0.003639997227	6
ZDHHC12	6.68E-08	0.5465761223	0.201	0.145	0.003784651973	6
ALYREF	6.75E-08	0.5715727568	0.152	0.102	0.003821423184	6
RPS6KA4	6.81E-08	0.6008008046	0.154	0.104	0.00385782519	6
FADD	6.96E-08	0.6952107583	0.121	0.077	0.00394405123	6
DVL3	7.24E-08	0.6894071553	0.138	0.091	0.004101370823	6
DNAJC13	7.43E-08	0.6096807803	0.163	0.111	0.004206583669	6
THOC5	7.53E-08	0.612286078	0.109	0.066	0.00426367854	6
TOP2B	8.30E-08	0.5114527802	0.238	0.179	0.004699715132	6
UBP1	8.37E-08	0.5245077346	0.196	0.14	0.004737850991	6
TBC1D13	8.39E-08	0.7784177004	0.106	0.065	0.004753561958	6
MRS2	8.63E-08	0.722036392	0.115	0.072	0.004887102512	6
S100A9	8.67E-08	0.6168637324	0.129	0.084	0.004911772312	6
HSD17B14	9.00E-08	0.5304754739	0.167	0.115	0.005097274048	6
SCNM1	9.09E-08	0.5171196556	0.211	0.152	0.005146424286	6
TIMM44	9.68E-08	0.6858853503	0.145	0.097	0.005481157217	6
STYX	1.06E-07	0.639411473	0.161	0.111	0.005996244386	6
IQSEC2	1.12E-07	0.7293503297	0.126	0.081	0.006322827771	6
GMPPB	1.21E-07	0.830247536	0.117	0.074	0.006874723496	6
TIMM22	1.23E-07	0.5012421275	0.182	0.127	0.006941147877	6
S100A8	1.29E-07	0.5893336008	0.116	0.073	0.007305374126	6
SMG5	1.29E-07	0.6504789646	0.155	0.105	0.00732108541	6
SCAF1	1.31E-07	0.5501356877	0.158	0.108	0.007439173249	6
MOGS	1.45E-07	0.6518904929	0.147	0.099	0.008186887214	6
SLC31A1	1.49E-07	0.6131341613	0.107	0.066	0.008419645501	6
PAXX	1.56E-07	0.6292375844	0.193	0.142	0.008853329338	6
TNFAIP8	1.59E-07	0.5217358189	0.208	0.151	0.008982224302	6
GEMIN6	1.61E-07	0.7617305064	0.119	0.077	0.009121553437	6
STK10	2.07E-07	0.5189597591	0.155	0.106	0.01170467009	6
B4GALT7	2.11E-07	0.5549290435	0.165	0.114	0.01195933889	6
MOB3A	2.33E-07	0.7172432918	0.141	0.095	0.01322212097	6
CENPX	2.48E-07	0.7102332666	0.162	0.115	0.01403872449	6
C12orf49	2.57E-07	0.5706141635	0.12	0.077	0.01456041639	6
KDELC2	2.68E-07	0.516694458	0.138	0.092	0.01516006497	6
RPP40	2.93E-07	0.8068767823	0.131	0.087	0.01659523944	6
CBX1	3.24E-07	0.5763135961	0.205	0.15	0.01832836754	6
TMEM222	3.29E-07	0.626805013	0.182	0.13	0.01865231207	6
ARMC6	3.44E-07	0.7871517248	0.106	0.067	0.01948909369	6
MTERF4	3.56E-07	0.5654169234	0.158	0.11	0.02016190904	6
BYSL	3.57E-07	0.6009687226	0.11	0.07	0.02019054883	6
OSTM1	3.79E-07	0.5008296659	0.208	0.152	0.02145078441	6
CINP	4.04E-07	0.5370552563	0.239	0.182	0.0228513097	6
TRPC4AP	4.55E-07	0.51239514	0.214	0.159	0.02577077122	6
KDELR3	4.63E-07	0.5385081946	0.162	0.113	0.02624357388	6
METTL26	4.89E-07	0.7116530532	0.176	0.128	0.02770332697	6
TMOD2	5.09E-07	0.6095991722	0.189	0.138	0.02879605401	6
CEP41	5.18E-07	0.6325272445	0.107	0.068	0.02933457884	6
CDYL	5.25E-07	0.6288605021	0.144	0.099	0.02973655885	6
IDE	5.48E-07	0.6387008513	0.128	0.086	0.03104655219	6
EMC1	5.63E-07	0.5437526661	0.138	0.093	0.03189322445	6
[truncated: 390 more rows]
