# Supplementary material for: Transcriptional heterogeneity of tumor-associated high endothelial venules defines inflammatory and stress-metabolic states with distinct prognostic associations
Source: Discov Oncol. 2026 May 8;17:964. doi: 10.1007/s12672-026-05162-2 (PMC13323434; doi:10.1007/s12672-026-05162-2)
Supplement: Supplementary file 4 — Supplementary Material 4. [file 12672_2026_5162_MOESM4_ESM.xlsx]

## Sheet: Table S5
Table S3: Summary of differentially expressed genes across venous endothelial subclusters
gene	p_val	avg_log2FC	pct.1	pct.2	p_val_adj	cluster
ZNF385D	0	1.061187488	0.748	0.364	0	TA-HEV
TSPAN7	0	1.005237609	0.791	0.409	0	TA-HEV
CCL14	0	1.165175431	0.758	0.386	0	TA-HEV
SOD2	0	1.429208492	0.76	0.392	0	TA-HEV
CLU	0	0.6992981736	0.777	0.423	0	TA-HEV
IL33	0	0.9368032171	0.671	0.318	0	TA-HEV
NCOA7	0	0.9654390216	0.809	0.467	0	TA-HEV
CSRP2	0	1.2642067	0.64	0.299	0	TA-HEV
TFPI	0	0.9104979519	0.671	0.331	0	TA-HEV
UGCG	0	0.9507306302	0.674	0.336	0	TA-HEV
HLA-DQA1	0	1.127377698	0.597	0.261	0	TA-HEV
BACE2	0	0.9295486196	0.698	0.367	0	TA-HEV
SELE	0	1.188322808	0.761	0.432	0	TA-HEV
ICAM1	0	0.9796794636	0.835	0.511	0	TA-HEV
NNMT	0	0.6792363427	0.867	0.545	0	TA-HEV
CDC42EP3	0	0.6977205694	0.717	0.397	0	TA-HEV
CDKN1A	0	0.974360641	0.815	0.498	0	TA-HEV
OLFM1	0	1.06784812	0.542	0.226	0	TA-HEV
HLA-DQB1	0	0.7540840477	0.675	0.361	0	TA-HEV
CEBPD	0	0.9234263812	0.652	0.339	0	TA-HEV
CNKSR3	0	1.001752269	0.539	0.228	0	TA-HEV
NFKBIZ	0	0.599247508	0.73	0.419	0	TA-HEV
HLA-DMA	0	0.5632310749	0.701	0.392	0	TA-HEV
RCAN1	0	1.234395837	0.655	0.347	0	TA-HEV
LGALS3	0	0.6386423551	0.854	0.547	0	TA-HEV
CLDN5	0	0.5326225381	0.78	0.474	0	TA-HEV
PHLDA1	0	0.9982755215	0.583	0.278	0	TA-HEV
EVA1C	0	0.967032064	0.555	0.252	0	TA-HEV
ADM5	0	1.386230133	0.452	0.151	0	TA-HEV
IER3	0	1.076140085	0.806	0.505	0	TA-HEV
NPC2	0	0.8320003714	0.897	0.596	0	TA-HEV
NAMPT	0	0.6073939943	0.744	0.445	0	TA-HEV
MCTP1	0	0.554693558	0.696	0.397	0	TA-HEV
SDCBP	0	0.5388968774	0.863	0.566	0	TA-HEV
ARID5B	0	0.7732973889	0.649	0.353	0	TA-HEV
HAPLN3	0	0.7192235264	0.58	0.284	0	TA-HEV
RND1	0	1.093410282	0.568	0.274	0	TA-HEV
GJA1	0	0.7892814222	0.645	0.352	0	TA-HEV
SERPING1	0	0.7310663377	0.614	0.321	0	TA-HEV
LIFR	0	0.6797486008	0.562	0.27	0	TA-HEV
KCTD12	0	0.8063093567	0.616	0.325	0	TA-HEV
CTSC	0	0.8610661941	0.636	0.347	0	TA-HEV
ETS2	0	0.5895362491	0.866	0.578	0	TA-HEV
ACKR1	0	0.9674278853	0.92	0.634	0	TA-HEV
TMEM70	0	1.226156225	0.498	0.213	0	TA-HEV
HLA-DPB1	0	0.6037482006	0.835	0.551	0	TA-HEV
C2CD4B	0	1.263670056	0.517	0.234	0	TA-HEV
HLA-DPA1	0	0.6542010002	0.863	0.585	0	TA-HEV
SOCS2	0	0.7461240515	0.526	0.249	0	TA-HEV
SERPINB1	0	0.6943912449	0.565	0.289	0	TA-HEV
IL1R1	0	0.7790415725	0.529	0.254	0	TA-HEV
PDLIM1	0	0.7841224668	0.931	0.656	0	TA-HEV
CTHRC1	0	0.820463365	0.532	0.264	0	TA-HEV
LITAF	0	1.118345902	0.523	0.26	0	TA-HEV
IL6	0	1.797657108	0.416	0.154	0	TA-HEV
SOCS3	0	0.6390090041	0.893	0.631	0	TA-HEV
TESC	0	1.171608289	0.403	0.141	0	TA-HEV
BIRC3	0	1.323748013	0.422	0.162	0	TA-HEV
PERP	0	0.8821275107	0.445	0.187	0	TA-HEV
EEF1B2	0	0.5464911494	0.929	0.673	0	TA-HEV
CSF2RB	0	0.8901142373	0.473	0.221	0	TA-HEV
CCL23	0	1.622124645	0.334	0.088	0	TA-HEV
NFKBIA	0	0.9599613358	0.956	0.71	0	TA-HEV
TM4SF1	0	0.8966782282	0.947	0.719	0	TA-HEV
HLA-DRA	0	0.6849183036	0.911	0.684	0	TA-HEV
ZNF267	0	1.078654692	0.373	0.152	0	TA-HEV
CYTL1	0	1.018162697	0.338	0.119	0	TA-HEV
CSF3	0	2.216638646	0.301	0.083	0	TA-HEV
ELOVL7	0	1.136277534	0.321	0.104	0	TA-HEV
TACR1	0	1.191359555	0.299	0.084	0	TA-HEV
C1QTNF1	0	1.268443206	0.301	0.091	0	TA-HEV
C7	0	1.146321642	0.314	0.105	0	TA-HEV
CST3	0	0.5635960225	0.966	0.777	0	TA-HEV
G0S2	0	2.731666469	0.25	0.063	0	TA-HEV
CDKN3	0	1.46842014	0.257	0.071	0	TA-HEV
CYGB	0	1.134081694	0.216	0.051	0	TA-HEV
RPLP0	0	0.5524480232	0.982	0.826	0	TA-HEV
CD74	0	0.6501180842	0.983	0.871	0	TA-HEV
TPT1	0	0.5102241585	0.998	0.936	0	TA-HEV
ADRB2	1.15E-305	1.218444014	0.268	0.085	6.53E-301	TA-HEV
TNFAIP3	2.64E-305	0.9859977671	0.583	0.321	1.49E-300	TA-HEV
PLSCR1	1.87E-304	0.5638222447	0.728	0.439	1.06E-299	TA-HEV
NRN1	2.50E-303	0.6331283494	0.56	0.295	1.41E-298	TA-HEV
PIM3	1.01E-301	0.5228835133	0.769	0.472	5.71E-297	TA-HEV
CSRNP1	1.66E-301	0.5700801456	0.585	0.308	9.38E-297	TA-HEV
ZFAND5	1.02E-298	0.5210005868	0.759	0.469	5.77E-294	TA-HEV
ITPKC	1.10E-298	0.974759836	0.353	0.141	6.24E-294	TA-HEV
PDIA5	1.17E-298	0.739909098	0.384	0.159	6.61E-294	TA-HEV
FAM13C	4.04E-296	0.8043976095	0.289	0.098	2.29E-291	TA-HEV
MAT2A	3.28E-293	0.8000169076	0.488	0.245	1.86E-288	TA-HEV
MMRN1	9.22E-293	0.9956398893	0.4	0.178	5.22E-288	TA-HEV
HLA-DRB5	1.06E-287	0.6510071789	0.745	0.473	5.98E-283	TA-HEV
CTSH	1.79E-282	0.53283308	0.627	0.354	1.01E-277	TA-HEV
RALGDS	6.01E-282	0.6482928763	0.493	0.246	3.40E-277	TA-HEV
SLC25A25	1.14E-280	0.8027256472	0.408	0.185	6.44E-276	TA-HEV
ZC3H12A	5.69E-278	0.9768743117	0.379	0.168	3.22E-273	TA-HEV
COTL1	3.11E-277	0.6508464526	0.664	0.394	1.76E-272	TA-HEV
IRF1	1.01E-273	0.5600544965	0.701	0.431	5.70E-269	TA-HEV
MYC	3.94E-271	0.753818025	0.52	0.276	2.23E-266	TA-HEV
BAG3	6.05E-271	0.5159191892	0.618	0.345	3.43E-266	TA-HEV
LRG1	2.97E-269	1.537301652	0.215	0.062	1.68E-264	TA-HEV
CNIH1	6.02E-268	0.5180196958	0.618	0.348	3.41E-263	TA-HEV
LINC-PINT	1.36E-267	0.8060387793	0.384	0.171	7.72E-263	TA-HEV
SOX17	1.20E-266	1.008987719	0.452	0.228	6.80E-262	TA-HEV
MAFF	4.28E-266	0.6354918216	0.532	0.28	2.42E-261	TA-HEV
PNP	1.03E-265	0.6766730433	0.639	0.375	5.85E-261	TA-HEV
TPD52L1	2.96E-264	0.6062020632	0.44	0.21	1.68E-259	TA-HEV
HSD17B11	1.58E-263	0.5012751703	0.521	0.271	8.97E-259	TA-HEV
RELL1	2.13E-263	0.7695700474	0.373	0.165	1.21E-258	TA-HEV
PMP22	3.87E-262	0.5460603135	0.693	0.416	2.19E-257	TA-HEV
LRRC1	2.67E-259	0.6652754997	0.348	0.146	1.51E-254	TA-HEV
RPL17	7.62E-259	0.594181792	0.852	0.622	4.32E-254	TA-HEV
ANKRD29	1.36E-258	0.5460926016	0.327	0.131	7.71E-254	TA-HEV
PLSCR4	1.72E-258	0.7000964081	0.332	0.136	9.73E-254	TA-HEV
TOMM5	7.82E-258	0.5362375277	0.566	0.311	4.43E-253	TA-HEV
EGLN3	5.75E-256	1.26622151	0.217	0.066	3.26E-251	TA-HEV
LPCAT4	1.18E-253	0.6162723715	0.426	0.206	6.69E-249	TA-HEV
NUPR1	7.72E-250	0.6657473766	0.319	0.128	4.37E-245	TA-HEV
TRIB1	2.22E-249	0.6918248705	0.468	0.239	1.26E-244	TA-HEV
ADAMTS4	7.33E-248	1.075850541	0.411	0.205	4.15E-243	TA-HEV
ADAMTS9	3.31E-247	0.6375845561	0.61	0.36	1.88E-242	TA-HEV
PCBD1	3.85E-244	0.8404481103	0.27	0.099	2.18E-239	TA-HEV
TLL1	1.78E-243	0.7116629725	0.356	0.157	1.01E-238	TA-HEV
MAP3K8	9.94E-242	0.5725862988	0.55	0.304	5.63E-237	TA-HEV
CD55	1.11E-241	0.5360965206	0.588	0.331	6.29E-237	TA-HEV
INSIG1	3.24E-240	0.7844560277	0.483	0.256	1.83E-235	TA-HEV
MET	4.04E-238	0.70870354	0.321	0.135	2.29E-233	TA-HEV
SNCA	2.42E-234	0.8532434809	0.277	0.107	1.37E-229	TA-HEV
SLC1A5	1.49E-233	0.6836196882	0.327	0.141	8.45E-229	TA-HEV
CTNNAL1	1.12E-230	0.5165953997	0.486	0.257	6.36E-226	TA-HEV
FOSL1	2.39E-228	1.269867172	0.26	0.1	1.35E-223	TA-HEV
MKL2	2.05E-227	0.6388886458	0.45	0.237	1.16E-222	TA-HEV
GNG12	1.65E-224	0.5500518286	0.421	0.212	9.34E-220	TA-HEV
BNIP3	1.11E-221	0.5953728305	0.339	0.151	6.30E-217	TA-HEV
NANS	1.29E-220	0.5476509861	0.42	0.21	7.30E-216	TA-HEV
TIPARP	5.39E-218	0.815233409	0.301	0.128	3.05E-213	TA-HEV
RELB	3.93E-217	0.6375155821	0.432	0.224	2.23E-212	TA-HEV
IMPDH2	9.66E-217	0.5196219829	0.439	0.227	5.47E-212	TA-HEV
KDM6B	3.72E-216	0.5745076132	0.462	0.247	2.11E-211	TA-HEV
TIFA	3.93E-216	0.8597900226	0.324	0.147	2.23E-211	TA-HEV
CHIC2	5.63E-216	0.5593273233	0.469	0.252	3.19E-211	TA-HEV
ARL5B	9.20E-213	0.7380826434	0.377	0.188	5.21E-208	TA-HEV
EEF1G	2.59E-211	0.6306198875	0.588	0.378	1.47E-206	TA-HEV
ARID5A	3.71E-208	0.6344982884	0.401	0.205	2.10E-203	TA-HEV
RHOU	1.72E-207	0.7151478811	0.264	0.106	9.75E-203	TA-HEV
TNFRSF10B	1.78E-205	0.5437484186	0.432	0.226	1.01E-200	TA-HEV
TPBG	1.75E-203	0.6258581602	0.291	0.125	9.89E-199	TA-HEV
HLA-DQA2	1.20E-200	1.137452165	0.25	0.101	6.81E-196	TA-HEV
IFNGR2	3.32E-200	0.532004653	0.428	0.226	1.88E-195	TA-HEV
MEOX2	5.54E-200	0.6399521517	0.319	0.146	3.14E-195	TA-HEV
REL	6.04E-199	0.5574652699	0.442	0.24	3.42E-194	TA-HEV
EMP1	1.67E-198	0.6355929043	0.858	0.614	9.47E-194	TA-HEV
FAM213A	2.22E-198	0.5074998423	0.476	0.269	1.26E-193	TA-HEV
NXT1	6.80E-198	0.5308555426	0.385	0.193	3.85E-193	TA-HEV
HSPB8	5.86E-196	0.8858946501	0.278	0.12	3.32E-191	TA-HEV
KIAA0040	3.17E-192	0.8795695694	0.249	0.102	1.80E-187	TA-HEV
NGRN	6.46E-192	0.5868764778	0.366	0.181	3.66E-187	TA-HEV
MYRIP	9.74E-192	0.7698408236	0.247	0.099	5.51E-187	TA-HEV
EGR1	2.07E-191	0.5214775161	0.651	0.416	1.17E-186	TA-HEV
ZFP36	1.47E-187	0.5520739161	0.918	0.753	8.32E-183	TA-HEV
NR4A2	1.20E-186	0.6667727694	0.431	0.239	6.79E-182	TA-HEV
TTC39A	9.09E-186	1.739199494	0.104	0.019	5.15E-181	TA-HEV
TIAM1	9.96E-185	0.9580034136	0.161	0.048	5.64E-180	TA-HEV
RBKS	7.74E-182	1.382334401	0.22	0.089	4.38E-177	TA-HEV
NFKBID	4.73E-181	0.9238458512	0.225	0.09	2.68E-176	TA-HEV
CADM3	5.26E-179	1.203297806	0.161	0.05	2.98E-174	TA-HEV
CFB	3.89E-178	1.251248997	0.162	0.051	2.20E-173	TA-HEV
HSD3B7	3.52E-176	0.7158831163	0.25	0.107	2.00E-171	TA-HEV
SAMD4A	4.50E-176	0.7799916705	0.228	0.092	2.55E-171	TA-HEV
SAV1	7.67E-175	0.5192206543	0.407	0.221	4.34E-170	TA-HEV
LDLR	4.63E-174	0.5197732562	0.403	0.218	2.62E-169	TA-HEV
HOXD1	5.81E-173	0.967807103	0.189	0.068	3.29E-168	TA-HEV
HLA-DOA	4.05E-171	0.887291579	0.164	0.053	2.29E-166	TA-HEV
SLCO4A1	1.50E-170	0.9323517091	0.195	0.073	8.49E-166	TA-HEV
BAALC	2.10E-170	0.8170611931	0.168	0.056	1.19E-165	TA-HEV
UBD	2.16E-170	1.546820028	0.191	0.072	1.22E-165	TA-HEV
LEPR	4.06E-170	0.624838485	0.244	0.104	2.30E-165	TA-HEV
TNFAIP8	8.85E-170	1.085233643	0.16	0.052	5.01E-165	TA-HEV
CRYL1	1.05E-169	0.5343482124	0.275	0.125	5.95E-165	TA-HEV
SH3BGRL2	2.38E-168	0.5061262306	0.273	0.123	1.35E-163	TA-HEV
RBP5	3.06E-168	0.5653439536	0.31	0.151	1.73E-163	TA-HEV
PCDH19	3.48E-168	1.053417354	0.172	0.059	1.97E-163	TA-HEV
CCL2	1.42E-167	0.8129795862	0.462	0.278	8.05E-163	TA-HEV
MTHFD2	3.40E-165	0.8313612289	0.227	0.096	1.93E-160	TA-HEV
RNF122	7.01E-165	0.7610475117	0.192	0.072	3.97E-160	TA-HEV
H2AFX	2.13E-164	0.5303098073	0.367	0.193	1.21E-159	TA-HEV
SYBU	7.28E-164	0.7309836365	0.183	0.066	4.12E-159	TA-HEV
PDLIM3	4.24E-163	0.5132234926	0.293	0.14	2.40E-158	TA-HEV
NOLC1	1.76E-162	0.5469130667	0.315	0.157	9.95E-158	TA-HEV
PFKFB3	8.87E-161	0.7032097434	0.264	0.122	5.02E-156	TA-HEV
LYRM1	2.38E-159	0.6335478524	0.243	0.108	1.35E-154	TA-HEV
SERPINA3	3.36E-159	2.12004213	0.108	0.026	1.90E-154	TA-HEV
RNF19B	1.19E-158	0.8772587501	0.224	0.096	6.76E-154	TA-HEV
THBS1	1.94E-158	0.5651118883	0.451	0.268	1.10E-153	TA-HEV
MIR222HG	2.62E-158	0.8564163485	0.255	0.118	1.48E-153	TA-HEV
GCA	1.47E-154	0.5074882843	0.224	0.095	8.30E-150	TA-HEV
POSTN	1.97E-152	0.655036911	0.408	0.238	1.12E-147	TA-HEV
DEDD	7.40E-152	0.6154223629	0.234	0.103	4.19E-147	TA-HEV
GTF2B	2.27E-151	0.6051873072	0.298	0.149	1.28E-146	TA-HEV
GPR68	4.22E-149	0.6788046541	0.19	0.075	2.39E-144	TA-HEV
CYBRD1	1.29E-148	0.5381275396	0.196	0.079	7.31E-144	TA-HEV
C21orf91	1.47E-148	0.5393962143	0.294	0.146	8.34E-144	TA-HEV
ODC1	1.69E-147	0.5093392655	0.321	0.167	9.57E-143	TA-HEV
SELM	5.89E-145	0.6023727929	0.477	0.308	3.33E-140	TA-HEV
NFATC2	2.04E-144	0.6245603985	0.294	0.149	1.16E-139	TA-HEV
BMP2	2.92E-144	1.011963364	0.201	0.085	1.65E-139	TA-HEV
TACSTD2	3.32E-142	0.7379088944	0.236	0.108	1.88E-137	TA-HEV
ARNTL2	5.36E-141	0.7883680786	0.154	0.055	3.04E-136	TA-HEV
HMOX1	1.49E-140	1.33300634	0.197	0.084	8.42E-136	TA-HEV
NFIL3	1.62E-140	0.8682341416	0.186	0.076	9.19E-136	TA-HEV
MLF1	2.21E-140	0.6416691497	0.233	0.107	1.25E-135	TA-HEV
CCDC109B	1.35E-139	0.7793569143	0.264	0.131	7.65E-135	TA-HEV
TMEM54	2.34E-139	0.7733998317	0.188	0.077	1.32E-134	TA-HEV
MED24	9.60E-139	0.9122947596	0.228	0.106	5.43E-134	TA-HEV
RRAGC	1.84E-137	0.6244560916	0.224	0.101	1.04E-132	TA-HEV
LRIG3	3.23E-137	0.7574447824	0.202	0.087	1.83E-132	TA-HEV
SERTAD2	4.93E-136	0.5473460618	0.254	0.124	2.79E-131	TA-HEV
RP11-536O18.1	7.86E-136	0.880396764	0.194	0.083	4.45E-131	TA-HEV
CPVL	9.63E-134	0.6477904434	0.186	0.077	5.45E-129	TA-HEV
EGR3	1.61E-133	0.5371643194	0.228	0.105	9.11E-129	TA-HEV
TNFRSF10A	2.13E-133	0.5020846681	0.228	0.105	1.21E-128	TA-HEV
DOCK11	1.01E-132	0.8249637405	0.131	0.043	5.72E-128	TA-HEV
CORO2A	1.14E-131	0.8745696068	0.123	0.039	6.46E-127	TA-HEV
3-3월	7.01E-131	0.5499160404	0.289	0.151	3.97E-126	TA-HEV
FRMD3	6.60E-128	0.9052830198	0.116	0.035	3.74E-123	TA-HEV
UAP1	6.76E-128	0.5456056383	0.251	0.124	3.83E-123	TA-HEV
DENND2D	1.35E-127	0.8978990726	0.125	0.041	7.64E-123	TA-HEV
FAM110B	8.18E-127	1.12305956	0.105	0.03	4.63E-122	TA-HEV
TRIM16	1.55E-125	0.7589928936	0.15	0.057	8.78E-121	TA-HEV
AKAP12	6.02E-125	0.5201837692	0.23	0.109	3.41E-120	TA-HEV
ST8SIA4	8.34E-125	0.6162473754	0.24	0.119	4.72E-120	TA-HEV
RAB11FIP1	4.07E-124	0.6129194167	0.123	0.04	2.31E-119	TA-HEV
CTGF	8.97E-123	0.501955115	0.503	0.332	5.08E-118	TA-HEV
EHD1	1.44E-122	0.5354149564	0.254	0.129	8.16E-118	TA-HEV
IGF2BP2	6.55E-120	0.761877193	0.127	0.044	3.71E-115	TA-HEV
ASRGL1	7.80E-120	0.5002780601	0.224	0.107	4.42E-115	TA-HEV
IL2RG	3.33E-119	1.183897418	0.103	0.031	1.89E-114	TA-HEV
RTEL1-TNFRSF6B	1.00E-118	1.229690113	0.244	0.129	5.68E-114	TA-HEV
LIPG	1.48E-118	1.235376997	0.109	0.034	8.38E-114	TA-HEV
CCDC178	1.09E-116	0.8015615073	0.139	0.052	6.16E-112	TA-HEV
C4orf32	4.42E-116	0.5054010991	0.311	0.176	2.51E-111	TA-HEV
AK4	5.69E-116	0.6891719529	0.144	0.055	3.22E-111	TA-HEV
CTTNBP2	7.51E-116	0.7407952862	0.115	0.038	4.25E-111	TA-HEV
CXCL2	2.23E-115	0.5884207905	0.397	0.246	1.26E-110	TA-HEV
HOPX	2.51E-115	0.7733924726	0.115	0.038	1.42E-110	TA-HEV
DCUN1D3	4.61E-115	0.6260831915	0.187	0.084	2.61E-110	TA-HEV
FGL2	5.94E-115	0.6116786571	0.127	0.045	3.37E-110	TA-HEV
STX11	6.77E-112	0.9232125654	0.129	0.047	3.83E-107	TA-HEV
CBR3	6.96E-112	0.796747114	0.183	0.083	3.94E-107	TA-HEV
GLA	4.29E-111	0.6177718669	0.217	0.107	2.43E-106	TA-HEV
PRXL2A	8.24E-110	0.8412038555	0.127	0.047	4.66E-105	TA-HEV
TP53BP2	1.20E-109	0.6219183043	0.198	0.094	6.77E-105	TA-HEV
PLCXD3	1.30E-108	0.6412197507	0.121	0.043	7.39E-104	TA-HEV
NOP16	3.17E-107	0.5142977857	0.215	0.107	1.79E-102	TA-HEV
AC090498.1	4.07E-107	0.5554229117	0.466	0.317	2.30E-102	TA-HEV
RSPO3	9.93E-107	0.738450063	0.138	0.054	5.62E-102	TA-HEV
SETBP1	3.83E-106	0.893155165	0.108	0.036	2.17E-101	TA-HEV
ERRFI1	6.60E-105	0.60725634	0.161	0.07	3.74E-100	TA-HEV
SNAPC1	7.37E-105	0.5183821425	0.199	0.096	4.17E-100	TA-HEV
CH25H	1.82E-103	1.143587267	0.151	0.065	1.03E-98	TA-HEV
MINA	3.97E-103	0.7945338312	0.145	0.06	2.25E-98	TA-HEV
SEPTIN10	1.70E-102	0.6604700039	0.11	0.038	9.62E-98	TA-HEV
TICAM1	2.62E-102	0.5654641189	0.184	0.086	1.48E-97	TA-HEV
TCEA3	4.28E-102	0.616379902	0.115	0.042	2.42E-97	TA-HEV
APH1B	4.52E-101	0.5767016334	0.144	0.06	2.56E-96	TA-HEV
GAS5	2.73E-99	0.8888090912	0.173	0.082	1.55E-94	TA-HEV
BMP4	5.26E-99	0.7734250481	0.125	0.048	2.98E-94	TA-HEV
SRPX	2.08E-98	0.5758649145	0.136	0.056	1.18E-93	TA-HEV
GCH1	7.71E-98	0.6346253359	0.171	0.08	4.37E-93	TA-HEV
PLAAT3	8.12E-98	0.5570823208	0.108	0.038	4.60E-93	TA-HEV
MOB3B	9.24E-98	0.6293739432	0.131	0.052	5.23E-93	TA-HEV
RBIS	1.43E-96	0.5753746856	0.111	0.04	8.08E-92	TA-HEV
ARG2	2.24E-96	1.155353278	0.105	0.037	1.27E-91	TA-HEV
SLC25A44	5.32E-96	0.6191120768	0.171	0.08	3.01E-91	TA-HEV
SHB	1.13E-95	0.7126422392	0.141	0.06	6.42E-91	TA-HEV
IRAK2	2.23E-95	0.7769763676	0.165	0.077	1.26E-90	TA-HEV
AC058791.1	2.09E-94	0.7899977413	0.127	0.051	1.18E-89	TA-HEV
PTAFR	3.12E-93	0.5269641529	0.187	0.092	1.77E-88	TA-HEV
HMGA1	5.50E-93	0.5257218435	0.176	0.085	3.11E-88	TA-HEV
PPRC1	1.27E-92	0.5412004801	0.164	0.076	7.17E-88	TA-HEV
RFX2	1.02E-91	0.5638537443	0.169	0.08	5.78E-87	TA-HEV
GASK1B	3.79E-91	0.7050203066	0.124	0.05	2.15E-86	TA-HEV
NOCT	1.05E-90	1.021180059	0.121	0.049	5.92E-86	TA-HEV
ALDH1A3	2.57E-90	0.552805108	0.113	0.044	1.45E-85	TA-HEV
ITPRID2	8.83E-90	0.5280067134	0.115	0.045	5.00E-85	TA-HEV
ICAM4	1.06E-89	0.5747168922	0.208	0.11	6.00E-85	TA-HEV
PTGS2	3.24E-88	0.5354259128	0.157	0.074	1.84E-83	TA-HEV
SNAP25	7.71E-88	0.5459594501	0.116	0.046	4.37E-83	TA-HEV
PALM2-AKAP2	1.61E-87	0.5830096097	0.152	0.069	9.11E-83	TA-HEV
APEX2	3.13E-84	0.5567309007	0.135	0.06	1.77E-79	TA-HEV
SLC9B2	6.92E-84	0.5526979984	0.13	0.057	3.92E-79	TA-HEV
WDYHV1	1.96E-83	0.5208955447	0.138	0.062	1.11E-78	TA-HEV
SNHG6	5.15E-83	0.5153385104	0.163	0.079	2.92E-78	TA-HEV
NFKBIE	5.95E-83	0.6960696582	0.14	0.064	3.37E-78	TA-HEV
PPIF	6.27E-83	0.6014742631	0.107	0.042	3.55E-78	TA-HEV
SLC35F2	8.21E-83	0.7218094222	0.118	0.049	4.65E-78	TA-HEV
SLC25A33	5.38E-82	0.5158747009	0.172	0.086	3.04E-77	TA-HEV
PIM1	7.94E-82	0.5081848623	0.181	0.093	4.50E-77	TA-HEV
TMEM185B	9.39E-82	0.577614908	0.123	0.052	5.32E-77	TA-HEV
PVT1	1.19E-80	0.6272356008	0.105	0.042	6.76E-76	TA-HEV
LRRC8D	1.24E-80	0.6369871088	0.105	0.041	7.00E-76	TA-HEV
SOCS1	9.64E-80	0.5930170086	0.128	0.057	5.46E-75	TA-HEV
TMEM176B	6.57E-79	0.7776684667	0.128	0.058	3.72E-74	TA-HEV
ZMYM6NB	1.82E-78	0.5760293256	0.219	0.123	1.03E-73	TA-HEV
NCEH1	2.09E-78	0.565539877	0.124	0.055	1.18E-73	TA-HEV
ARAP2	1.33E-77	0.5244535301	0.105	0.042	7.53E-73	TA-HEV
TMEM176A	2.75E-77	0.7014930981	0.127	0.057	1.56E-72	TA-HEV
VWA5A	3.92E-77	0.6233076782	0.109	0.045	2.22E-72	TA-HEV
ERI1	1.03E-76	0.5394525039	0.115	0.049	5.84E-72	TA-HEV
CCN2	1.21E-74	0.7548657902	0.129	0.059	6.86E-70	TA-HEV
SERPINB8	4.15E-73	0.6526434531	0.102	0.042	2.35E-68	TA-HEV
SNN	1.44E-71	0.5352227244	0.118	0.053	8.16E-67	TA-HEV
C8orf82	2.87E-71	0.5821047876	0.105	0.044	1.63E-66	TA-HEV
DAPK1	4.62E-70	0.6010360368	0.109	0.047	2.62E-65	TA-HEV
CXCL3	1.35E-67	0.6793717511	0.193	0.11	7.66E-63	TA-HEV
TAF4B	1.53E-67	0.5914538231	0.108	0.047	8.66E-63	TA-HEV
GEM	6.36E-67	0.7526345628	0.148	0.076	3.60E-62	TA-HEV
SLC25A43	3.78E-65	0.5614035886	0.101	0.044	2.14E-60	TA-HEV
SPP1	1.53E-62	0.8499094847	0.125	0.062	8.68E-58	TA-HEV
KLHL21	1.69E-62	0.6402389735	0.114	0.054	9.58E-58	TA-HEV
SERPINE1	8.32E-62	0.5690768024	0.449	0.338	4.71E-57	TA-HEV
DYRK3	5.56E-61	0.5257191599	0.104	0.047	3.15E-56	TA-HEV
DNAJC25-GNG10	9.75E-58	0.7038321194	0.118	0.059	5.52E-53	TA-HEV
ADCK3	2.53E-56	0.5975162462	0.101	0.048	1.43E-51	TA-HEV
FLJ20021	1.92E-49	0.7594682894	0.102	0.051	1.09E-44	TA-HEV
DIABLO	2.74E-44	0.5477674546	0.108	0.058	1.55E-39	TA-HEV
CXCL8	3.76E-33	0.7688038574	0.135	0.085	2.13E-28	TA-HEV
FBLN2	0	2.010920655	0.504	0.171	0	Immature VEC
TGM2	0	1.250653334	0.675	0.348	0	Immature VEC
HEG1	0	0.9626607983	0.745	0.426	0	Immature VEC
SLCO2A1	0	0.8514616443	0.797	0.494	0	Immature VEC
CYP1B1	0	1.835955073	0.455	0.169	0	Immature VEC
VCAN	0	1.535605382	0.425	0.172	0	Immature VEC
CPE	0	2.291954948	0.301	0.076	0	Immature VEC
FBN1	4.12E-303	1.179439799	0.498	0.224	2.33E-298	Immature VEC
MALL	9.76E-281	0.8450880824	0.689	0.395	5.53E-276	Immature VEC
RNASE1	1.66E-279	0.6838445973	0.95	0.767	9.42E-275	Immature VEC
NR2F2	2.88E-278	0.8741664119	0.702	0.402	1.63E-273	Immature VEC
CRTAC1	1.17E-275	2.524676103	0.205	0.048	6.64E-271	Immature VEC
SELP	9.88E-272	0.8106634899	0.721	0.421	5.60E-267	Immature VEC
VCAM1	9.32E-269	1.295664467	0.525	0.264	5.28E-264	Immature VEC
ASS1	2.45E-268	1.257560978	0.416	0.175	1.39E-263	Immature VEC
PTGDS	2.43E-261	1.467243826	0.408	0.171	1.38E-256	Immature VEC
PLAC9	5.07E-261	1.346830518	0.361	0.139	2.87E-256	Immature VEC
VEGFC	6.93E-255	1.318075927	0.344	0.131	3.92E-250	Immature VEC
TPST2	2.78E-253	1.014232935	0.516	0.259	1.57E-248	Immature VEC
PLA1A	9.61E-250	1.44658207	0.334	0.126	5.44E-245	Immature VEC
VWF	6.06E-236	0.5541504096	0.98	0.816	3.43E-231	Immature VEC
LTC4S	9.79E-235	1.178203836	0.342	0.134	5.54E-230	Immature VEC
HYAL2	2.68E-223	0.6932394344	0.82	0.564	1.52E-218	Immature VEC
ENTPD1	8.13E-219	0.5838446807	0.691	0.413	4.60E-214	Immature VEC
CDH23	1.02E-216	2.588164368	0.123	0.021	5.78E-212	Immature VEC
ELN	8.72E-216	1.506270754	0.272	0.097	4.94E-211	Immature VEC
LTBP2	3.05E-213	1.875342543	0.185	0.049	1.72E-208	Immature VEC
ACKR3	1.22E-210	1.336251311	0.277	0.1	6.89E-206	Immature VEC
CPXM2	1.53E-206	1.012998962	0.513	0.276	8.69E-202	Immature VEC
NUAK1	9.27E-197	0.8217171484	0.546	0.302	5.25E-192	Immature VEC
LHX6	2.75E-191	1.057533118	0.382	0.179	1.56E-186	Immature VEC
ARL4A	1.53E-187	0.5501272883	0.791	0.53	8.66E-183	Immature VEC
MPZL2	4.78E-187	0.7667192833	0.48	0.248	2.71E-182	Immature VEC
FOXP1	8.29E-186	0.5645450559	0.79	0.527	4.70E-181	Immature VEC
ADGRG6	1.00E-185	1.497085239	0.254	0.095	5.66E-181	Immature VEC
SULF1	7.96E-184	1.959101608	0.157	0.041	4.51E-179	Immature VEC
EPB41L3	2.15E-182	0.9279839174	0.413	0.205	1.22E-177	Immature VEC
EPHB4	3.47E-178	0.6401144599	0.475	0.251	1.96E-173	Immature VEC
ADAMTS18	1.37E-169	1.558672509	0.185	0.058	7.75E-165	Immature VEC
NDRG1	1.44E-168	0.5042078919	0.758	0.508	8.17E-164	Immature VEC
PPIC	2.03E-163	0.583332399	0.669	0.429	1.15E-158	Immature VEC
RAB3C	2.12E-162	1.121669989	0.349	0.169	1.20E-157	Immature VEC
PTPN5	1.65E-156	1.561127543	0.133	0.034	9.34E-152	Immature VEC
BMPR2	1.20E-155	0.5355986368	0.699	0.452	6.78E-151	Immature VEC
FAM171A1	1.71E-153	0.7497039176	0.392	0.2	9.71E-149	Immature VEC
NOS3	4.50E-153	0.81578521	0.359	0.176	2.55E-148	Immature VEC
IL1R11	1.43E-150	0.7124442115	0.532	0.311	8.08E-146	Immature VEC
CMKLR1	2.22E-150	1.695292419	0.127	0.032	1.26E-145	Immature VEC
APLNR	2.80E-150	0.7553144867	0.555	0.341	1.58E-145	Immature VEC
TMTC1	1.27E-149	0.8570978823	0.38	0.196	7.19E-145	Immature VEC
TEK	3.95E-149	0.5936164726	0.475	0.266	2.23E-144	Immature VEC
FILIP1L	1.03E-148	0.9236704712	0.411	0.222	5.81E-144	Immature VEC
DAAM1	5.35E-144	0.5804431818	0.531	0.316	3.03E-139	Immature VEC
TCN2	2.93E-143	0.7171334813	0.489	0.287	1.66E-138	Immature VEC
PALLD	4.85E-143	1.24159316	0.24	0.1	2.75E-138	Immature VEC
MRAS	1.60E-140	1.139279771	0.226	0.091	9.07E-136	Immature VEC
CXorf36	1.02E-138	0.5464517369	0.676	0.455	5.75E-134	Immature VEC
ITPR2	1.31E-133	0.9485189992	0.277	0.128	7.42E-129	Immature VEC
FN1	2.93E-133	0.7279925262	0.418	0.228	1.66E-128	Immature VEC
HSD17B12	1.06E-132	0.6209695466	0.448	0.257	6.01E-128	Immature VEC
SESN3	1.44E-131	1.018917196	0.307	0.151	8.16E-127	Immature VEC
CD551	6.93E-130	0.5913745364	0.593	0.384	3.92E-125	Immature VEC
MSRB3	7.17E-128	0.6816484982	0.403	0.224	4.06E-123	Immature VEC
9-9월	1.02E-127	0.5698095932	0.382	0.203	5.77E-123	Immature VEC
PGM5	9.40E-123	0.8885298951	0.252	0.113	5.32E-118	Immature VEC
CXCL21	1.94E-122	1.032881179	0.445	0.267	1.10E-117	Immature VEC
6-9월	3.51E-122	0.7697216797	0.319	0.16	1.99E-117	Immature VEC
ADIRF	7.07E-122	0.5574518834	0.841	0.622	4.00E-117	Immature VEC
MMP28	1.90E-121	0.903454405	0.3	0.149	1.08E-116	Immature VEC
PERP1	9.58E-121	0.8170060762	0.419	0.246	5.42E-116	Immature VEC
SEPN1	7.93E-118	0.7850730571	0.332	0.175	4.49E-113	Immature VEC
CLU1	2.39E-117	0.7650958935	0.72	0.509	1.36E-112	Immature VEC
STMN1	6.76E-117	0.5131854351	0.523	0.328	3.83E-112	Immature VEC
RASSF9	5.93E-115	1.06584101	0.221	0.097	3.36E-110	Immature VEC
DUSP4	9.25E-114	0.8024967833	0.239	0.108	5.24E-109	Immature VEC
TMBIM1	3.16E-113	0.5074908424	0.46	0.275	1.79E-108	Immature VEC
FOXC1	1.14E-112	0.665493739	0.39	0.221	6.47E-108	Immature VEC
CLDN11	2.28E-111	1.1846112	0.219	0.098	1.29E-106	Immature VEC
PLXDC2	5.52E-111	0.8599194625	0.306	0.158	3.13E-106	Immature VEC
PALM	2.11E-109	1.014166638	0.176	0.069	1.19E-104	Immature VEC
FBXO34	4.28E-107	0.9856404556	0.215	0.096	2.42E-102	Immature VEC
SAMD5	1.19E-104	1.170768666	0.167	0.066	6.73E-100	Immature VEC
NET1	2.74E-104	0.6137659726	0.361	0.203	1.55E-99	Immature VEC
TPO	6.32E-102	0.9245820011	0.172	0.069	3.58E-97	Immature VEC
MAN1A1	6.47E-102	0.6419988089	0.33	0.181	3.66E-97	Immature VEC
SLC8A1	1.19E-101	1.024116244	0.228	0.109	6.75E-97	Immature VEC
RAPH1	2.25E-99	0.8025253562	0.242	0.118	1.27E-94	Immature VEC
TIMP1	2.37E-99	0.5309084285	0.876	0.706	1.34E-94	Immature VEC
LYST	5.86E-99	0.6953716951	0.352	0.201	3.32E-94	Immature VEC
GOLM1	3.16E-98	0.6591135232	0.308	0.164	1.79E-93	Immature VEC
DNASE1L1	3.79E-98	0.7399558905	0.253	0.126	2.15E-93	Immature VEC
PPP2R5A	2.33E-97	0.5490847036	0.377	0.218	1.32E-92	Immature VEC
EMP3	2.68E-97	0.665303746	0.298	0.158	1.52E-92	Immature VEC
ANXA4	2.05E-95	0.546309011	0.414	0.254	1.16E-90	Immature VEC
FAM155A	1.79E-94	1.257609963	0.14	0.053	1.02E-89	Immature VEC
MEIS2	1.17E-92	0.7041616021	0.174	0.073	6.63E-88	Immature VEC
ADGRA2	4.06E-92	0.7696427597	0.233	0.115	2.30E-87	Immature VEC
RSPO31	1.34E-90	1.448206705	0.16	0.067	7.57E-86	Immature VEC
PLCB4	1.27E-89	0.7975919634	0.295	0.164	7.22E-85	Immature VEC
KPNA2	3.80E-89	0.6974492831	0.295	0.162	2.15E-84	Immature VEC
CLEC3B	5.74E-88	0.5363400636	0.371	0.22	3.25E-83	Immature VEC
CRIP1	4.31E-87	0.5835900353	0.413	0.254	2.44E-82	Immature VEC
PTRF	1.15E-86	0.505450723	0.589	0.422	6.49E-82	Immature VEC
PTAFR1	5.41E-86	1.005668191	0.214	0.106	3.07E-81	Immature VEC
PTGS21	1.00E-83	1.373377809	0.184	0.086	5.68E-79	Immature VEC
DIXDC1	1.40E-82	0.6989553689	0.298	0.169	7.90E-78	Immature VEC
IL13RA1	2.38E-82	0.5470200585	0.373	0.227	1.35E-77	Immature VEC
MEDAG	1.22E-80	1.247509721	0.115	0.042	6.91E-76	Immature VEC
TMEM176A1	1.28E-80	1.4516328	0.153	0.066	7.22E-76	Immature VEC
ENDOD1	2.28E-79	0.5050652811	0.302	0.172	1.29E-74	Immature VEC
SLC6A6	1.51E-78	0.6744392223	0.24	0.125	8.53E-74	Immature VEC
MMP16	7.56E-77	1.326231579	0.111	0.041	4.28E-72	Immature VEC
SLC40A1	8.36E-77	0.6812137323	0.238	0.127	4.73E-72	Immature VEC
POSTN1	7.33E-76	0.5316335264	0.423	0.27	4.15E-71	Immature VEC
SLC7A1	1.02E-75	0.9127180922	0.177	0.084	5.80E-71	Immature VEC
C10orf128	2.19E-75	0.7046394983	0.293	0.17	1.24E-70	Immature VEC
ECSCR.1	3.69E-75	0.5297166285	0.438	0.291	2.09E-70	Immature VEC
ITPR1	1.78E-74	0.5630180736	0.281	0.16	1.01E-69	Immature VEC
RGS5	7.82E-74	0.6071129148	0.15	0.065	4.43E-69	Immature VEC
SIRPA	1.09E-73	0.7585739858	0.224	0.119	6.19E-69	Immature VEC
STC1	1.23E-73	0.5675107912	0.34	0.206	6.94E-69	Immature VEC
BNC2	2.85E-73	0.7429142296	0.202	0.102	1.61E-68	Immature VEC
HYAL1	6.08E-73	0.7622782018	0.149	0.066	3.44E-68	Immature VEC
CD52	6.46E-73	0.7583314608	0.122	0.048	3.66E-68	Immature VEC
RP11-382A20.3	7.25E-73	0.697322041	0.267	0.151	4.11E-68	Immature VEC
MID1	3.24E-72	0.5669778332	0.24	0.13	1.83E-67	Immature VEC
CXCL31	1.00E-71	0.8646411585	0.227	0.121	5.68E-67	Immature VEC
ICAM41	2.17E-71	0.6431164684	0.232	0.125	1.23E-66	Immature VEC
LINC01197	5.06E-70	0.8855193843	0.165	0.078	2.87E-65	Immature VEC
SELL	5.71E-70	0.9466675821	0.183	0.091	3.23E-65	Immature VEC
TMTC2	1.13E-69	0.8540713246	0.181	0.09	6.39E-65	Immature VEC
RAB27A	6.51E-69	0.5546183078	0.297	0.177	3.69E-64	Immature VEC
RDH10	4.01E-68	0.9564857267	0.111	0.043	2.27E-63	Immature VEC
FAM89B	7.19E-68	0.5402254335	0.247	0.138	4.07E-63	Immature VEC
SMAD3	1.46E-67	0.6060293266	0.22	0.119	8.26E-63	Immature VEC
TLL11	1.48E-67	0.59252441	0.329	0.204	8.38E-63	Immature VEC
LSR	2.90E-67	0.5348278364	0.243	0.135	1.64E-62	Immature VEC
KIAA1522	3.59E-67	0.7762065226	0.134	0.058	2.03E-62	Immature VEC
MARVELD1	3.73E-67	0.7340742908	0.143	0.064	2.11E-62	Immature VEC
WLS	2.47E-66	0.5942130516	0.267	0.155	1.40E-61	Immature VEC
SLC41A3	9.53E-65	0.5105337735	0.313	0.193	5.40E-60	Immature VEC
RFK	1.09E-64	0.5045353872	0.294	0.179	6.15E-60	Immature VEC
MESDC1	1.66E-64	0.5759833993	0.23	0.127	9.39E-60	Immature VEC
TMEM176B1	1.76E-63	1.215774932	0.146	0.069	9.99E-59	Immature VEC
PLAT	4.50E-63	0.5032204691	0.283	0.168	2.55E-58	Immature VEC
FAM84B	1.16E-62	0.5646096508	0.26	0.151	6.58E-58	Immature VEC
CALML4	5.45E-62	0.7496462327	0.226	0.127	3.09E-57	Immature VEC
LDLRAD3	5.04E-61	0.7011363957	0.183	0.096	2.85E-56	Immature VEC
ARFGEF3	1.22E-60	0.9918467517	0.118	0.051	6.93E-56	Immature VEC
TM6SF1	1.29E-60	0.8288334449	0.164	0.083	7.28E-56	Immature VEC
CCDC68	1.84E-59	0.6595816546	0.224	0.127	1.04E-54	Immature VEC
COL5A2	2.95E-59	0.6401222482	0.136	0.063	1.67E-54	Immature VEC
AQP3	2.54E-57	1.191203935	0.116	0.052	1.44E-52	Immature VEC
KANK1	3.39E-56	0.9084909839	0.119	0.054	1.92E-51	Immature VEC
MLPH	2.12E-55	0.9497415129	0.158	0.081	1.20E-50	Immature VEC
LCN6	1.41E-54	0.5589901196	0.196	0.108	8.00E-50	Immature VEC
ZMAT3	5.44E-54	0.6609212326	0.147	0.073	3.08E-49	Immature VEC
FGR	3.41E-53	0.8235000333	0.117	0.053	1.93E-48	Immature VEC
TANC2	5.38E-53	0.615748251	0.118	0.054	3.05E-48	Immature VEC
PIR	1.64E-52	0.5475291024	0.195	0.108	9.31E-48	Immature VEC
ALDH1A1	7.17E-52	0.933166758	0.135	0.067	4.06E-47	Immature VEC
RUNX1T1	1.11E-50	0.5997394012	0.186	0.103	6.28E-46	Immature VEC
STOX2	1.54E-50	0.5517184364	0.14	0.07	8.69E-46	Immature VEC
SRPX1	8.83E-50	1.081053051	0.139	0.072	5.00E-45	Immature VEC
MLLT3	1.04E-48	0.595753245	0.158	0.084	5.87E-44	Immature VEC
NAGA	1.38E-48	0.6329487904	0.157	0.084	7.82E-44	Immature VEC
SMC6	5.90E-48	0.5775926388	0.187	0.107	3.34E-43	Immature VEC
C1R	1.93E-47	0.5032407957	0.255	0.161	1.09E-42	Immature VEC
GEM1	6.03E-47	0.7015021542	0.161	0.088	3.42E-42	Immature VEC
SERPINE2	1.14E-46	0.5264547513	0.137	0.07	6.43E-42	Immature VEC
SYT15	1.78E-46	0.6473369372	0.197	0.116	1.01E-41	Immature VEC
HAS2	7.17E-46	0.7705904217	0.105	0.048	4.06E-41	Immature VEC
SCARA3	2.74E-45	1.206458473	0.101	0.046	1.55E-40	Immature VEC
METTL7A	3.59E-45	0.5445133285	0.197	0.116	2.03E-40	Immature VEC
ASRGL11	1.48E-44	0.6487288228	0.215	0.133	8.39E-40	Immature VEC
PLEKHA7	8.58E-44	0.8146232132	0.13	0.067	4.86E-39	Immature VEC
GATA6	1.94E-43	1.028859308	0.103	0.049	1.10E-38	Immature VEC
ARL4D	1.93E-40	0.5614329218	0.125	0.065	1.10E-35	Immature VEC
NYNRIN	5.68E-40	0.5509071635	0.132	0.07	3.22E-35	Immature VEC
ST6GALNAC1	8.61E-40	0.8431657704	0.11	0.055	4.87E-35	Immature VEC
ABCC4	2.49E-39	0.5781053233	0.141	0.078	1.41E-34	Immature VEC
CA8	9.09E-39	0.765621983	0.104	0.051	5.15E-34	Immature VEC
STMN3	6.47E-38	0.5415961973	0.132	0.072	3.67E-33	Immature VEC
BMX	1.05E-37	0.8603769256	0.127	0.069	5.92E-33	Immature VEC
BMP21	1.28E-37	0.5087715433	0.186	0.113	7.28E-33	Immature VEC
COL17A1	2.05E-36	0.5871957974	0.103	0.052	1.16E-31	Immature VEC
AHNAK2	2.92E-36	0.6491997019	0.143	0.081	1.65E-31	Immature VEC
DAPK11	1.14E-35	0.8200252786	0.112	0.059	6.46E-31	Immature VEC
NR1D1	5.18E-35	0.5643517445	0.114	0.06	2.93E-30	Immature VEC
CDH11	1.88E-34	0.8313061903	0.1	0.051	1.06E-29	Immature VEC
PLCXD31	8.46E-34	1.11191966	0.112	0.061	4.79E-29	Immature VEC
TMEM256-PLSCR3	1.37E-33	0.6524291738	0.144	0.084	7.78E-29	Immature VEC
SLC25A29	1.85E-33	0.5106611243	0.134	0.076	1.05E-28	Immature VEC
FKBP1B	2.04E-33	0.5749548022	0.108	0.057	1.16E-28	Immature VEC
ASAP3	7.55E-33	0.5561460002	0.123	0.068	4.28E-28	Immature VEC
ATP5SL	8.70E-33	0.5178404281	0.123	0.069	4.93E-28	Immature VEC
PELI2	1.04E-32	0.5557726716	0.114	0.062	5.88E-28	Immature VEC
FAM124A	5.81E-32	0.5733994851	0.135	0.079	3.29E-27	Immature VEC
TLN2	6.43E-32	0.6438372715	0.108	0.058	3.64E-27	Immature VEC
FGF2	3.44E-30	0.8235076358	0.11	0.062	1.95E-25	Immature VEC
FAM20B	1.77E-29	0.5807057674	0.111	0.062	1.00E-24	Immature VEC
SIAE	1.27E-28	0.5136163	0.118	0.068	7.20E-24	Immature VEC
NDN	3.08E-27	0.5323849666	0.104	0.058	1.74E-22	Immature VEC
C1S	2.35E-25	0.6080504616	0.129	0.079	1.33E-20	Immature VEC
AC013461.1	2.49E-25	0.5819721444	0.108	0.063	1.41E-20	Immature VEC
MALAT1	0	0.9714555001	0.98	0.997	0	Mature VEC
ENPP2	3.65E-151	1.397186199	0.153	0.322	2.06E-146	Mature VEC
RGCC	5.57E-97	1.623151873	0.407	0.335	3.15E-92	Mature VEC
GNG11	1.50E-84	0.5615823756	0.757	0.909	8.47E-80	Mature VEC
CDC42SE1	1.27E-82	0.5235855591	0.133	0.247	7.18E-78	Mature VEC
IGFBP5	1.82E-81	1.802326883	0.193	0.113	1.03E-76	Mature VEC
IFI27L2	4.29E-73	0.5010348593	0.102	0.195	2.43E-68	Mature VEC
IFRD1	4.50E-73	0.5447448832	0.227	0.377	2.55E-68	Mature VEC
SPARC	2.64E-71	0.5207652744	0.791	0.914	1.50E-66	Mature VEC
LENG8	1.23E-70	0.5493831097	0.16	0.277	6.98E-66	Mature VEC
PRPF4B	1.74E-70	0.5003519924	0.213	0.352	9.85E-66	Mature VEC
RAPGEF3	9.88E-70	0.5744583363	0.208	0.347	5.59E-65	Mature VEC
GOLIM4	3.27E-69	0.5663613884	0.165	0.285	1.85E-64	Mature VEC
ASAH1	3.90E-69	0.5351955491	0.167	0.286	2.21E-64	Mature VEC
OAZ2	1.03E-67	0.684026416	0.196	0.328	5.83E-63	Mature VEC
COL4A1	4.80E-66	0.8850740892	0.566	0.599	2.72E-61	Mature VEC
FYN	6.51E-65	0.5151341182	0.182	0.303	3.68E-60	Mature VEC
SRSF6	6.15E-64	0.5170884395	0.132	0.233	3.48E-59	Mature VEC
NOTCH4	1.02E-63	2.207278848	0.266	0.207	5.79E-59	Mature VEC
CYB5D2	1.69E-63	0.5874852366	0.094	0.176	9.56E-59	Mature VEC
SEPP1	3.43E-62	0.6224534263	0.167	0.28	1.94E-57	Mature VEC
ZMYM2	3.34E-61	0.5130759546	0.118	0.211	1.89E-56	Mature VEC
MPRIP	9.73E-61	0.5194033767	0.172	0.286	5.51E-56	Mature VEC
UPF2	4.05E-59	0.5916571579	0.17	0.281	2.30E-54	Mature VEC
PNKD	5.39E-59	0.5166005063	0.202	0.327	3.05E-54	Mature VEC
SEC14L1	4.87E-58	0.6085466603	0.342	0.534	2.76E-53	Mature VEC
EGFL7	4.94E-58	0.7216745148	0.675	0.784	2.80E-53	Mature VEC
SLC9A3R2	9.37E-58	1.739660783	0.381	0.362	5.31E-53	Mature VEC
CCNL2	3.49E-57	0.6054387773	0.197	0.321	1.98E-52	Mature VEC
SLC26A2	1.36E-56	0.5411238068	0.065	0.13	7.69E-52	Mature VEC
RICTOR	2.29E-56	0.5180645823	0.106	0.188	1.30E-51	Mature VEC
CCDC14	1.18E-53	0.5129016717	0.089	0.164	6.66E-49	Mature VEC
PARP14	1.45E-53	0.5819583129	0.253	0.399	8.20E-49	Mature VEC
SRGAP2	5.05E-53	0.5339170003	0.132	0.223	2.86E-48	Mature VEC
RSBN1L	1.35E-52	0.5148725497	0.142	0.235	7.62E-48	Mature VEC
INTS3	1.45E-52	0.5610065732	0.087	0.159	8.19E-48	Mature VEC
R3HDM2	2.85E-52	0.5324223615	0.072	0.138	1.61E-47	Mature VEC
SLIRP	4.72E-52	0.5158021047	0.308	0.477	2.67E-47	Mature VEC
CREBZF	7.21E-52	0.5168972766	0.088	0.16	4.08E-47	Mature VEC
MDM4	9.39E-52	0.6434948314	0.139	0.232	5.32E-47	Mature VEC
DIP2A	1.09E-51	0.5241938314	0.093	0.167	6.17E-47	Mature VEC
NDUFV3	5.58E-51	0.5184637249	0.108	0.187	3.16E-46	Mature VEC
RIMKLB	8.53E-51	0.577143686	0.094	0.168	4.83E-46	Mature VEC
RAPGEF2	3.30E-50	0.5602533367	0.103	0.18	1.87E-45	Mature VEC
FASTK	9.08E-50	0.526815439	0.103	0.179	5.14E-45	Mature VEC
RABL6	1.79E-49	0.5050701001	0.085	0.154	1.01E-44	Mature VEC
MEF2A	2.94E-49	0.5098242063	0.267	0.412	1.67E-44	Mature VEC
UACA	3.77E-49	0.6631210935	0.257	0.399	2.14E-44	Mature VEC
RGS12	9.16E-49	0.5043150648	0.103	0.178	5.19E-44	Mature VEC
HNRNPH1	1.95E-48	0.508057038	0.408	0.62	1.10E-43	Mature VEC
EVA1B	4.27E-48	0.5907855632	0.12	0.202	2.42E-43	Mature VEC
MRPL52	4.42E-48	0.5323639588	0.274	0.421	2.50E-43	Mature VEC
DUS1L	6.67E-48	0.5204997639	0.06	0.118	3.78E-43	Mature VEC
MYO6	8.49E-48	0.7130525364	0.167	0.267	4.81E-43	Mature VEC
SHANK3	1.10E-47	0.639691444	0.189	0.297	6.21E-43	Mature VEC
WDR60	1.49E-47	0.6598311474	0.15	0.244	8.42E-43	Mature VEC
NSD1	3.07E-47	0.5256436845	0.113	0.19	1.74E-42	Mature VEC
ABI2	4.69E-47	0.5702716964	0.099	0.171	2.65E-42	Mature VEC
TIA1	1.04E-46	0.5044947656	0.138	0.224	5.88E-42	Mature VEC
LIMCH1	1.72E-46	0.6148988299	0.15	0.242	9.73E-42	Mature VEC
GPX3	2.08E-46	0.729479768	0.083	0.149	1.18E-41	Mature VEC
KMT2B	3.90E-46	0.5178710713	0.054	0.107	2.21E-41	Mature VEC
GIMAP5	9.77E-46	0.6154722156	0.12	0.2	5.53E-41	Mature VEC
CPNE2	1.01E-45	0.5591673119	0.124	0.204	5.74E-41	Mature VEC
FABP4	1.22E-45	0.7641267279	0.161	0.25	6.89E-41	Mature VEC
ARRDC2	1.30E-45	0.6113601384	0.113	0.189	7.39E-41	Mature VEC
HDAC7	2.29E-45	0.5533009938	0.304	0.462	1.30E-40	Mature VEC
SH3TC1	3.79E-45	0.5752666742	0.123	0.202	2.15E-40	Mature VEC
CKLF	5.28E-45	0.6542366618	0.141	0.228	2.99E-40	Mature VEC
TBC1D20	5.55E-45	0.5072205611	0.07	0.129	3.14E-40	Mature VEC
FAM118A	1.05E-44	0.5434474586	0.123	0.203	5.95E-40	Mature VEC
MCC	1.67E-44	0.51480298	0.057	0.111	9.44E-40	Mature VEC
EIF4EBP1	1.91E-44	0.5083351714	0.137	0.221	1.08E-39	Mature VEC
TLE4	3.01E-44	0.6708461617	0.096	0.165	1.70E-39	Mature VEC
ARHGEF7	4.48E-44	0.649859726	0.137	0.222	2.54E-39	Mature VEC
LPAR6	1.40E-43	0.5267721039	0.324	0.487	7.90E-39	Mature VEC
ANKRD26	1.96E-43	0.5073306175	0.073	0.133	1.11E-38	Mature VEC
PCSK7	2.12E-43	0.6242705356	0.131	0.212	1.20E-38	Mature VEC
PPP6R2	2.65E-43	0.6034389001	0.071	0.13	1.50E-38	Mature VEC
GGA1	5.49E-43	0.5934027977	0.085	0.149	3.11E-38	Mature VEC
TNRC6A	5.92E-43	0.6816372882	0.13	0.211	3.35E-38	Mature VEC
NCOA3	1.04E-42	0.6628793321	0.12	0.196	5.91E-38	Mature VEC
SIN3B	1.31E-42	0.5232973143	0.105	0.175	7.43E-38	Mature VEC
PLXNA2	3.90E-42	0.5568527461	0.144	0.228	2.21E-37	Mature VEC
RBM6	5.20E-42	0.7478695738	0.173	0.271	2.95E-37	Mature VEC
TAOK2	5.60E-42	0.6827483666	0.155	0.246	3.17E-37	Mature VEC
ROBO4	8.56E-42	0.5716957013	0.305	0.462	4.85E-37	Mature VEC
CDYL	9.98E-42	0.5811770422	0.057	0.108	5.65E-37	Mature VEC
UQCC2	1.01E-41	0.5943622823	0.14	0.222	5.74E-37	Mature VEC
INSR	2.62E-41	2.146642747	0.336	0.316	1.48E-36	Mature VEC
ARHGAP5	3.51E-41	0.6835684778	0.082	0.143	1.99E-36	Mature VEC
ASPSCR1	3.87E-41	0.5301959741	0.07	0.126	2.19E-36	Mature VEC
IAH1	4.14E-41	0.6261013108	0.087	0.149	2.35E-36	Mature VEC
C19orf66	4.20E-41	0.5087647993	0.17	0.264	2.38E-36	Mature VEC
LINC00998	8.53E-41	0.5142639401	0.098	0.164	4.83E-36	Mature VEC
CBX6	1.32E-40	0.5869325605	0.083	0.144	7.45E-36	Mature VEC
SPPL2B	1.78E-40	0.5457879688	0.059	0.11	1.01E-35	Mature VEC
RDX	1.92E-40	0.5060135814	0.401	0.604	1.09E-35	Mature VEC
DNMT3A	4.70E-40	0.5017202176	0.06	0.111	2.66E-35	Mature VEC
HIST1H2AC	5.90E-40	0.5398361409	0.076	0.133	3.34E-35	Mature VEC
TPM1	8.17E-40	0.7146996494	0.211	0.321	4.63E-35	Mature VEC
EPM2AIP1	1.71E-39	0.5033292559	0.071	0.126	9.70E-35	Mature VEC
METTL26	2.54E-39	0.5374088728	0.073	0.13	1.44E-34	Mature VEC
GPR4	3.31E-39	0.5340739938	0.135	0.214	1.88E-34	Mature VEC
C8orf33	4.92E-39	0.6270701157	0.107	0.176	2.79E-34	Mature VEC
PKN1	5.25E-39	0.5573860766	0.156	0.242	2.97E-34	Mature VEC
CCNT2	5.69E-39	0.5337889422	0.069	0.123	3.22E-34	Mature VEC
AFDN	6.55E-39	0.5012780735	0.075	0.132	3.71E-34	Mature VEC
GSN	6.61E-39	0.7864783324	0.644	0.768	3.75E-34	Mature VEC
RAPGEF1	7.12E-39	0.6983163619	0.116	0.188	4.03E-34	Mature VEC
PEX26	7.28E-39	0.5114408264	0.055	0.104	4.12E-34	Mature VEC
NELFB	9.18E-39	0.6062257543	0.071	0.125	5.20E-34	Mature VEC
IFI35	1.09E-38	0.5651425477	0.158	0.246	6.16E-34	Mature VEC
CCM2L	1.17E-38	0.5287784508	0.082	0.14	6.62E-34	Mature VEC
CDK10	1.64E-38	0.6611574387	0.105	0.174	9.29E-34	Mature VEC
SYNE3	4.97E-38	0.5280070535	0.064	0.116	2.82E-33	Mature VEC
RCBTB2	6.50E-38	0.5183965829	0.074	0.129	3.68E-33	Mature VEC
SYMPK	6.85E-38	0.6538769176	0.096	0.159	3.88E-33	Mature VEC
EPB41L2	6.96E-38	0.5401952003	0.062	0.112	3.94E-33	Mature VEC
TDRP	7.92E-38	0.5189964609	0.079	0.136	4.48E-33	Mature VEC
PILRB	8.48E-38	0.7583479834	0.076	0.133	4.80E-33	Mature VEC
TMOD2	1.00E-37	0.5271783728	0.079	0.136	5.67E-33	Mature VEC
PLXND1	1.02E-37	0.5046153681	0.359	0.535	5.78E-33	Mature VEC
ADARB1	1.56E-37	0.6301703507	0.085	0.144	8.83E-33	Mature VEC
CWF19L2	1.78E-37	0.7834338599	0.09	0.152	1.01E-32	Mature VEC
STC2	1.96E-37	0.5034932727	0.1	0.164	1.11E-32	Mature VEC
MAP3K6	2.50E-37	0.7313848147	0.062	0.112	1.42E-32	Mature VEC
ATP5MC1	2.61E-37	0.506878904	0.104	0.172	1.48E-32	Mature VEC
CBR4	3.22E-37	0.5471191823	0.064	0.114	1.83E-32	Mature VEC
MUS81	3.40E-37	0.5391554454	0.06	0.109	1.92E-32	Mature VEC
CC2D1A	3.54E-37	0.5186563103	0.06	0.109	2.00E-32	Mature VEC
WDFY3	5.44E-37	0.5225251213	0.07	0.123	3.08E-32	Mature VEC
ITPRIPL2	7.12E-37	0.6946154919	0.091	0.152	4.03E-32	Mature VEC
OGA	1.46E-36	0.6053302904	0.071	0.126	8.27E-32	Mature VEC
MCM3AP	1.81E-36	0.5382292372	0.074	0.129	1.03E-31	Mature VEC
MYO15B	1.84E-36	0.7590790303	0.097	0.161	1.04E-31	Mature VEC
NUDT16L1	2.96E-36	0.5082990541	0.066	0.116	1.67E-31	Mature VEC
FTX	3.45E-36	0.6395193393	0.094	0.155	1.95E-31	Mature VEC
TTC14	3.64E-36	0.6744966413	0.133	0.208	2.06E-31	Mature VEC
GMFG	4.49E-36	0.5118095713	0.37	0.549	2.55E-31	Mature VEC
MXD4	5.62E-36	0.7846054285	0.115	0.185	3.18E-31	Mature VEC
DGKE	1.68E-35	0.7088676035	0.063	0.113	9.50E-31	Mature VEC
TTF1	2.21E-35	0.6657845136	0.08	0.135	1.25E-30	Mature VEC
VPS53	2.50E-35	0.598814707	0.067	0.117	1.41E-30	Mature VEC
COX7A1	3.35E-35	0.6348935778	0.306	0.455	1.90E-30	Mature VEC
STT3B	3.48E-35	0.5657177913	0.143	0.22	1.97E-30	Mature VEC
PLEKHJ1	3.75E-35	0.5184050205	0.077	0.13	2.12E-30	Mature VEC
UXS1	5.18E-35	0.6326057208	0.067	0.116	2.93E-30	Mature VEC
DPP9	6.42E-35	0.5521058919	0.071	0.122	3.64E-30	Mature VEC
RNF213	9.36E-35	0.6661522627	0.309	0.464	5.30E-30	Mature VEC
MAML2	1.57E-34	0.6274620508	0.1	0.162	8.90E-30	Mature VEC
PGF	1.97E-34	0.5072261632	0.094	0.152	1.11E-29	Mature VEC
COMMD2	5.01E-34	0.6964918921	0.128	0.199	2.84E-29	Mature VEC
ARHGEF15	6.30E-34	0.5813156813	0.207	0.305	3.57E-29	Mature VEC
SLC27A3	8.70E-34	0.5957633568	0.083	0.138	4.92E-29	Mature VEC
GAS6	9.57E-34	0.552616595	0.195	0.289	5.42E-29	Mature VEC
OXLD1	1.10E-33	0.5821254476	0.078	0.131	6.23E-29	Mature VEC
ZFHX3	1.16E-33	0.6307434485	0.106	0.169	6.55E-29	Mature VEC
JAM3	1.17E-33	0.6169262808	0.084	0.138	6.65E-29	Mature VEC
TSC22D4	1.20E-33	0.63120817	0.078	0.131	6.79E-29	Mature VEC
CCZ1	1.23E-33	0.5308986779	0.066	0.115	6.97E-29	Mature VEC
DDX60L	1.28E-33	0.5169918608	0.099	0.159	7.27E-29	Mature VEC
COX17	1.69E-33	0.753307314	0.285	0.423	9.58E-29	Mature VEC
CCDC80	1.90E-33	0.5657119845	0.082	0.135	1.08E-28	Mature VEC
METTL17	7.12E-33	0.5491027126	0.063	0.11	4.03E-28	Mature VEC
CCDC167	7.84E-33	0.5526742068	0.081	0.134	4.44E-28	Mature VEC
MUM1	8.10E-33	0.5505791847	0.073	0.124	4.59E-28	Mature VEC
MSI2	1.07E-32	0.6340275129	0.059	0.105	6.05E-28	Mature VEC
RCOR3	1.17E-32	0.5798343171	0.058	0.102	6.63E-28	Mature VEC
SH3PXD2A	1.21E-32	0.5380382533	0.062	0.109	6.83E-28	Mature VEC
KAT2A	1.23E-32	0.5485316922	0.078	0.13	6.96E-28	Mature VEC
TSPAN15	1.73E-32	0.6002019142	0.136	0.207	9.81E-28	Mature VEC
BTN3A1	1.73E-32	0.521274226	0.073	0.122	9.82E-28	Mature VEC
RIN2	2.20E-32	0.8006367674	0.13	0.2	1.24E-27	Mature VEC
HPS4	4.33E-32	0.5587246605	0.063	0.109	2.45E-27	Mature VEC
CCDC66	4.90E-32	0.5365027166	0.071	0.121	2.77E-27	Mature VEC
MAGI1	5.21E-32	0.8615604035	0.214	0.317	2.95E-27	Mature VEC
CHD3	5.77E-32	0.5368711902	0.118	0.181	3.27E-27	Mature VEC
ZMYND8	9.13E-32	0.5677799581	0.067	0.115	5.17E-27	Mature VEC
FADS3	1.01E-31	0.7057518282	0.073	0.122	5.70E-27	Mature VEC
MCM7	1.60E-31	0.5265584725	0.086	0.139	9.07E-27	Mature VEC
TSC2	2.22E-31	0.7545357396	0.09	0.145	1.26E-26	Mature VEC
CASKIN2	2.93E-31	0.6489027719	0.128	0.196	1.66E-26	Mature VEC
ASAP2	3.89E-31	0.6649742779	0.095	0.151	2.21E-26	Mature VEC
EFNA1	1.11E-30	0.6723522219	0.287	0.421	6.30E-26	Mature VEC
ANKRD13D	1.36E-30	0.5932460113	0.059	0.102	7.73E-26	Mature VEC
TMEM91	1.61E-30	0.5756112035	0.058	0.102	9.09E-26	Mature VEC
NDRG2	1.97E-30	0.6564191379	0.06	0.104	1.12E-25	Mature VEC
ARHGAP27	2.28E-30	0.6113133459	0.067	0.113	1.29E-25	Mature VEC
PAXX	2.57E-30	0.5656734834	0.094	0.15	1.46E-25	Mature VEC
HOXD9	2.67E-30	0.6476383813	0.156	0.232	1.51E-25	Mature VEC
PLPP1	3.98E-30	1.222591256	0.254	0.372	2.25E-25	Mature VEC
C12orf57	4.00E-30	0.5711598212	0.381	0.559	2.26E-25	Mature VEC
NAV1	4.70E-30	0.6987945958	0.108	0.168	2.66E-25	Mature VEC
NRGN	4.90E-30	0.5165224996	0.087	0.139	2.78E-25	Mature VEC
PET100	8.99E-30	0.7132182573	0.283	0.414	5.09E-25	Mature VEC
HSPG2	1.25E-29	0.5536661595	0.73	0.888	7.07E-25	Mature VEC
CDK11A	1.73E-29	0.6436211226	0.078	0.127	9.81E-25	Mature VEC
SORBS2	1.96E-29	0.8704225749	0.166	0.247	1.11E-24	Mature VEC
SHPRH	2.61E-29	0.6895611102	0.075	0.123	1.48E-24	Mature VEC
HNRNPU-AS1	3.45E-29	0.5728150021	0.072	0.119	1.95E-24	Mature VEC
MAFB	3.95E-29	0.5148645016	0.084	0.134	2.24E-24	Mature VEC
GIGYF1	4.60E-29	0.6195516976	0.059	0.102	2.61E-24	Mature VEC
ARHGEF10	4.61E-29	0.8139088909	0.079	0.128	2.61E-24	Mature VEC
DGKZ	5.32E-29	0.7754208702	0.147	0.22	3.01E-24	Mature VEC
DLL1	6.18E-29	0.6981588273	0.113	0.174	3.50E-24	Mature VEC
RNPC3	8.96E-29	0.7192266377	0.074	0.122	5.07E-24	Mature VEC
PMEPA1	9.19E-29	0.608189267	0.135	0.203	5.20E-24	Mature VEC
REX1BD	9.29E-29	0.5892011974	0.11	0.17	5.26E-24	Mature VEC
PPM1K	1.34E-28	0.5360237792	0.077	0.125	7.58E-24	Mature VEC
SPG7	1.53E-28	0.8337643406	0.194	0.283	8.65E-24	Mature VEC
PLCG1	1.57E-28	0.6995027801	0.115	0.175	8.88E-24	Mature VEC
GOSR2	2.95E-28	0.5781971509	0.083	0.132	1.67E-23	Mature VEC
AES	8.65E-28	0.5234659659	0.268	0.382	4.90E-23	Mature VEC
KLHL5	1.63E-27	0.7324611112	0.121	0.183	9.25E-23	Mature VEC
MBD3	1.64E-27	0.6622549323	0.074	0.121	9.28E-23	Mature VEC
NDUFA3	2.06E-27	0.7103999122	0.284	0.41	1.17E-22	Mature VEC
MMP15	2.99E-27	0.626903749	0.085	0.134	1.70E-22	Mature VEC
ANGPTL2	3.33E-27	0.5817536244	0.116	0.175	1.89E-22	Mature VEC
CTNNB1	5.34E-27	0.6924150581	0.381	0.555	3.02E-22	Mature VEC
SYNPO	1.56E-26	0.5253270196	0.239	0.339	8.84E-22	Mature VEC
ADD3	2.07E-26	0.8680112036	0.132	0.197	1.17E-21	Mature VEC
PDE8A	2.29E-26	0.6658940801	0.113	0.17	1.30E-21	Mature VEC
LGALS1	2.52E-26	0.7555083034	0.528	0.575	1.43E-21	Mature VEC
AGRN	2.56E-26	0.6254945185	0.164	0.237	1.45E-21	Mature VEC
TBCD	2.88E-26	0.7697303319	0.186	0.269	1.63E-21	Mature VEC
SOS1	3.83E-26	0.7902389922	0.112	0.169	2.17E-21	Mature VEC
HOXB3	5.02E-26	0.617815309	0.06	0.1	2.84E-21	Mature VEC
KALRN	5.11E-26	0.6718334464	0.068	0.11	2.90E-21	Mature VEC
SH2D3C	8.08E-26	0.7518936041	0.167	0.242	4.58E-21	Mature VEC
COMMD3	9.86E-26	0.7241098746	0.073	0.118	5.58E-21	Mature VEC
ANKFY1	1.40E-25	0.5078455014	0.062	0.102	7.91E-21	Mature VEC
FAM69B	1.65E-25	0.5737883935	0.062	0.103	9.34E-21	Mature VEC
CLCN7	2.95E-25	0.6484865336	0.06	0.1	1.67E-20	Mature VEC
GNAI1	3.66E-25	0.7208522305	0.068	0.11	2.07E-20	Mature VEC
EFHC1	4.71E-25	0.5837340175	0.065	0.106	2.67E-20	Mature VEC
NAA38	4.89E-25	0.5202354329	0.393	0.57	2.77E-20	Mature VEC
STK10	6.94E-25	0.7498865089	0.068	0.109	3.93E-20	Mature VEC
AP3M2	7.32E-25	0.6638425171	0.061	0.101	4.15E-20	Mature VEC
ATP5MC3	1.25E-24	0.5633826309	0.107	0.161	7.10E-20	Mature VEC
ARHGAP18	2.36E-24	0.9343945076	0.136	0.199	1.34E-19	Mature VEC
COL4A2	3.07E-24	0.6684786263	0.563	0.655	1.74E-19	Mature VEC
IFI44	3.25E-24	0.6744149133	0.196	0.279	1.84E-19	Mature VEC
VASH1	6.63E-24	0.7633067895	0.083	0.129	3.76E-19	Mature VEC
BEX3	7.63E-24	0.5877493887	0.112	0.168	4.32E-19	Mature VEC
NPTN	7.75E-24	0.7863468131	0.088	0.134	4.39E-19	Mature VEC
GPRC5B	8.41E-24	0.6350558215	0.098	0.147	4.76E-19	Mature VEC
ATP5IF1	1.29E-23	0.5080915405	0.159	0.23	7.33E-19	Mature VEC
RAD9A	2.42E-23	0.6642931329	0.071	0.112	1.37E-18	Mature VEC
FRMD8	3.21E-23	0.8685854809	0.088	0.135	1.82E-18	Mature VEC
DMTF1	3.37E-23	0.699258047	0.063	0.102	1.91E-18	Mature VEC
FMNL3	3.52E-23	0.7070454771	0.121	0.177	1.99E-18	Mature VEC
EMP31	4.26E-23	0.6343950846	0.149	0.213	2.41E-18	Mature VEC
IGKC	4.42E-23	2.364360613	0.132	0.191	2.50E-18	Mature VEC
RASGRF2	6.09E-23	0.7902333011	0.079	0.122	3.45E-18	Mature VEC
C1orf54	6.62E-23	0.5533784824	0.318	0.448	3.75E-18	Mature VEC
CDC42EP1	7.98E-23	0.6606617153	0.163	0.232	4.52E-18	Mature VEC
ITGA10	1.18E-22	0.7903196575	0.085	0.13	6.66E-18	Mature VEC
ATP13A2	1.18E-22	0.6782371018	0.063	0.101	6.67E-18	Mature VEC
PLCG2	1.44E-22	2.320636633	0.152	0.221	8.13E-18	Mature VEC
DDIT4	2.29E-22	1.240120587	0.385	0.4	1.29E-17	Mature VEC
NDUFB1	2.29E-22	0.6886665935	0.347	0.494	1.30E-17	Mature VEC
INPP5D	3.07E-22	0.6937277699	0.076	0.118	1.74E-17	Mature VEC
ETS1	3.20E-22	0.6480306935	0.346	0.487	1.81E-17	Mature VEC
SIPA1	9.53E-22	0.7050593029	0.072	0.111	5.40E-17	Mature VEC
NTHL1	1.50E-21	0.6186235353	0.092	0.137	8.47E-17	Mature VEC
AFAP1L1	4.35E-21	0.7898621469	0.143	0.205	2.46E-16	Mature VEC
TMEM47	6.94E-21	1.149422162	0.084	0.128	3.93E-16	Mature VEC
SEMA3F	7.17E-21	0.7134273997	0.164	0.232	4.06E-16	Mature VEC
SYCE1L	2.46E-20	0.7215939886	0.099	0.145	1.39E-15	Mature VEC
ARAP3	3.05E-20	0.7850505002	0.137	0.194	1.73E-15	Mature VEC
COL3A1	3.37E-20	0.5349600028	0.07	0.108	1.91E-15	Mature VEC
CX3CL1	5.86E-20	0.9119573831	0.122	0.174	3.32E-15	Mature VEC
TNFAIP8L1	2.07E-19	0.7116308903	0.128	0.182	1.17E-14	Mature VEC
RGS3	2.47E-19	0.6860500947	0.187	0.259	1.40E-14	Mature VEC
APOE	2.68E-19	0.9128272062	0.071	0.109	1.52E-14	Mature VEC
ANKRD36C	3.32E-19	0.9009353011	0.069	0.106	1.88E-14	Mature VEC
CA2	1.07E-18	1.816957842	0.113	0.085	6.09E-14	Mature VEC
SAMD9	1.37E-18	0.7437107924	0.104	0.149	7.77E-14	Mature VEC
HES1	1.52E-18	0.672005606	0.392	0.531	8.59E-14	Mature VEC
IVNS1ABP	5.00E-18	0.9413977319	0.289	0.404	2.83E-13	Mature VEC
TAF1C	5.07E-18	1.011132115	0.082	0.122	2.87E-13	Mature VEC
ZNF532	5.20E-18	0.8624287117	0.073	0.109	2.95E-13	Mature VEC
RBP1	2.10E-17	0.6136944335	0.069	0.103	1.19E-12	Mature VEC
ATP5MF	2.53E-17	0.6324571016	0.144	0.2	1.43E-12	Mature VEC
APOD	2.82E-17	0.9826301596	0.113	0.16	1.59E-12	Mature VEC
SNHG9	7.61E-17	0.9488393087	0.139	0.193	4.31E-12	Mature VEC
ARGLU1	1.04E-16	0.5831205842	0.486	0.691	5.89E-12	Mature VEC
USHBP1	1.46E-16	0.996402716	0.085	0.124	8.29E-12	Mature VEC
BLOC1S1	2.34E-16	0.9294517113	0.187	0.259	1.33E-11	Mature VEC
C4orf48	4.37E-16	0.625807531	0.243	0.328	2.47E-11	Mature VEC
PLK2	4.88E-16	0.6694955894	0.295	0.399	2.77E-11	Mature VEC
N4BP2L2	4.93E-16	0.6719828365	0.435	0.617	2.79E-11	Mature VEC
HCLS1	5.65E-16	0.6668372536	0.107	0.149	3.20E-11	Mature VEC
PINK1	8.72E-16	0.8336123635	0.146	0.2	4.94E-11	Mature VEC
HECW2	1.62E-15	1.791842854	0.142	0.117	9.20E-11	Mature VEC
SPRY4	1.75E-15	0.9727088306	0.125	0.174	9.91E-11	Mature VEC
IER5L	1.78E-15	0.7639700851	0.097	0.135	1.01E-10	Mature VEC
XAF1	3.32E-15	0.8184991795	0.27	0.371	1.88E-10	Mature VEC
HIP1R	3.35E-15	0.9834144472	0.075	0.109	1.90E-10	Mature VEC
LAMA4	3.41E-15	0.5223485458	0.296	0.396	1.93E-10	Mature VEC
KIAA1462	6.30E-15	0.6434545998	0.12	0.164	3.57E-10	Mature VEC
COL1A1	9.53E-15	1.001797468	0.083	0.119	5.39E-10	Mature VEC
SAMD9L	2.06E-14	0.7111123892	0.115	0.158	1.16E-09	Mature VEC
HIPK2	4.50E-14	1.042620783	0.074	0.106	2.55E-09	Mature VEC
IQCK	4.73E-14	0.8936025624	0.072	0.103	2.68E-09	Mature VEC
AC020916.1	5.25E-14	0.9534691315	0.074	0.107	2.97E-09	Mature VEC
MCF2L	1.53E-13	0.9890269826	0.182	0.245	8.65E-09	Mature VEC
SMTN	1.62E-13	1.088554866	0.097	0.135	9.19E-09	Mature VEC
DGKH	2.44E-13	1.066484491	0.141	0.191	1.38E-08	Mature VEC
IFI44L	2.95E-13	0.8103386108	0.278	0.377	1.67E-08	Mature VEC
FLT1	3.12E-13	0.9190557829	0.386	0.542	1.77E-08	Mature VEC
SLC6A61	4.85E-13	0.5309629947	0.124	0.165	2.75E-08	Mature VEC
ACOT7	5.25E-13	0.6759475113	0.097	0.132	2.97E-08	Mature VEC
IFIT3	5.76E-13	0.8836633043	0.162	0.215	3.26E-08	Mature VEC
OAS3	2.19E-12	0.5955380563	0.108	0.146	1.24E-07	Mature VEC
MAP1B	2.81E-12	0.725619421	0.191	0.252	1.59E-07	Mature VEC
CYBA	2.95E-12	0.8522749384	0.231	0.307	1.67E-07	Mature VEC
APOL2	3.01E-12	0.7500409012	0.075	0.105	1.71E-07	Mature VEC
CD36	3.85E-12	0.8474433464	0.111	0.149	2.18E-07	Mature VEC
ISG20	4.40E-12	0.9712606431	0.133	0.179	2.49E-07	Mature VEC
COLGALT1	4.50E-12	0.7805740725	0.141	0.186	2.55E-07	Mature VEC
ATP5I	6.60E-12	0.8679667615	0.227	0.299	3.74E-07	Mature VEC
KNOP1	1.04E-11	0.9914614852	0.119	0.16	5.86E-07	Mature VEC
OLFML2A	1.14E-11	0.8657568056	0.135	0.179	6.47E-07	Mature VEC
MTRNR2L8	2.85E-11	1.437239682	0.177	0.161	1.61E-06	Mature VEC
CASC15	3.23E-11	0.783807248	0.114	0.151	1.83E-06	Mature VEC
GRB10	3.31E-11	1.084526848	0.217	0.289	1.87E-06	Mature VEC
C5orf56	3.51E-11	0.8215061684	0.072	0.1	1.99E-06	Mature VEC
TMEM88	4.22E-11	1.041438095	0.215	0.284	2.39E-06	Mature VEC
DOCK6	5.94E-11	0.9847198206	0.185	0.243	3.37E-06	Mature VEC
NID1	6.35E-11	0.9113036129	0.181	0.238	3.60E-06	Mature VEC
JUP	6.44E-11	1.420581235	0.182	0.166	3.64E-06	Mature VEC
ARL15	1.57E-10	1.119729193	0.089	0.12	8.92E-06	Mature VEC
COL1A2	1.84E-10	1.064472154	0.076	0.104	1.04E-05	Mature VEC
PDGFB	3.10E-10	1.017039436	0.133	0.174	1.75E-05	Mature VEC
RBP7	6.01E-10	1.548618315	0.256	0.35	3.40E-05	Mature VEC
IFIT2	6.03E-10	1.249876047	0.077	0.103	3.42E-05	Mature VEC
SLC12A2	7.42E-10	1.003653186	0.105	0.139	4.20E-05	Mature VEC
ATP5ME	8.89E-10	0.6720993624	0.2	0.261	5.03E-05	Mature VEC
MTSS1	1.90E-09	0.8760814749	0.076	0.102	0.0001074111579	Mature VEC
PODXL	1.96E-09	1.29397899	0.326	0.353	0.0001107111212	Mature VEC
IDH2	2.69E-09	0.8952443962	0.105	0.137	0.0001521492756	Mature VEC
TM4SF18	3.36E-09	0.7301736942	0.298	0.389	0.0001904291994	Mature VEC
TSC22D3	1.35E-08	0.7477348563	0.441	0.593	0.0007660098698	Mature VEC
DYSF	1.38E-08	0.8569130443	0.18	0.229	0.0007797823837	Mature VEC
ADM	1.47E-08	1.417006366	0.136	0.177	0.0008298140826	Mature VEC
ACE	2.28E-08	1.162428182	0.095	0.124	0.001288971212	Mature VEC
RASGRP3	6.31E-08	0.9590903144	0.188	0.24	0.003571623292	Mature VEC
IGFBP3	1.83E-07	1.50037841	0.147	0.133	0.01038659251	Mature VEC
LINC00152	2.05E-07	0.9863587815	0.11	0.14	0.01159012378	Mature VEC
OAS2	2.25E-07	0.733036823	0.12	0.151	0.01274018692	Mature VEC
EFNB1	2.52E-07	0.965025135	0.096	0.122	0.01427899245	Mature VEC
DENND3	3.14E-07	1.055410241	0.08	0.104	0.01776285922	Mature VEC
EPSTI1	5.87E-07	0.7687430118	0.101	0.128	0.03325315246	Mature VEC
SOX18	7.78E-07	0.5608281207	0.315	0.397	0.0440565277	Mature VEC
ID1	7.87E-07	0.5421969965	0.545	0.631	0.04458937538	Mature VEC
OAS1	9.16E-07	0.7059246682	0.106	0.133	0.05186388358	Mature VEC
XIST	1.61E-06	0.7795057396	0.203	0.254	0.09109118325	Mature VEC
F2RL3	1.77E-06	1.197843945	0.151	0.139	0.1003215129	Mature VEC
NLRC5	2.90E-06	0.9976647212	0.097	0.121	0.1640928526	Mature VEC
ISG15	3.97E-06	1.588327184	0.39	0.464	0.2245337186	Mature VEC
FILIP1	7.08E-06	1.0482438	0.118	0.146	0.4008337004	Mature VEC
ID2	9.14E-06	1.076411538	0.299	0.384	0.5174774347	Mature VEC
CCND1	9.23E-06	1.338021077	0.19	0.186	0.5228034542	Mature VEC
CD276	1.62E-05	0.742553626	0.087	0.107	0.9165005695	Mature VEC
NES	1.94E-05	1.022125637	0.135	0.165	1	Mature VEC
MTRNR2L12	2.07E-05	0.7284143564	0.248	0.301	1	Mature VEC
EXOC3L2	3.16E-05	1.131030457	0.122	0.15	1	Mature VEC
PHLDB1	4.16E-05	1.013020482	0.112	0.137	1	Mature VEC
FAP	6.10E-05	0.8089491679	0.089	0.109	1	Mature VEC
ELOB	6.43E-05	0.6087125798	0.234	0.291	1	Mature VEC
FLT4	7.34E-05	1.247317195	0.092	0.113	1	Mature VEC
CAVIN3	7.95E-05	0.782912574	0.173	0.213	1	Mature VEC
MYO1B	8.39E-05	0.962566291	0.152	0.184	1	Mature VEC
JAG2	0.0006124381448	1.131745835	0.171	0.207	1	Mature VEC
IFIT1	0.0006416987846	1.191332773	0.141	0.169	1	Mature VEC
ADGRF5	0.002081153689	1.095736435	0.248	0.307	1	Mature VEC
IFI6	0.0027916041	0.9335386926	0.418	0.556	1	Mature VEC
PTP4A3	0.003435704041	0.9449354359	0.12	0.14	1	Mature VEC
PCDH12	0.004209711804	1.375249695	0.121	0.115	1	Mature VEC
FN11	0.005124154942	0.5077084249	0.242	0.28	1	Mature VEC
