# Supplementary material for: Transcriptional heterogeneity of tumor-associated high endothelial venules defines inflammatory and stress-metabolic states with distinct prognostic associations
Source: Discov Oncol. 2026 May 8;17:964. doi: 10.1007/s12672-026-05162-2 (PMC13323434; doi:10.1007/s12672-026-05162-2)
Supplement: Supplementary file 8 — Supplementary Material 8. [file 12672_2026_5162_MOESM8_ESM.xlsx]

## Sheet: Table S3
Table S1: Differentially expressed genes of major endothelial cell clusters in the pan-cancer integrated analysis
Gene	p_val	avg_log2FC	pct.1	pct.2	p_val_adj	cluster
ACKR1	0	4.178717691	0.72	0.128	0	Venous
SELP	0	3.660691599	0.465	0.055	0	Venous
SELE	0	3.383396001	0.534	0.127	0	Venous
CCL14	0	3.343474876	0.51	0.127	0	Venous
HLA-DRA	0	1.857887187	0.763	0.44	0	Venous
HLA-DQA1	0	3.202148295	0.377	0.065	0	Venous
ZNF385D	0	2.32652013	0.488	0.18	0	Venous
IL33	0	1.774746115	0.435	0.136	0	Venous
DUSP23	0	1.892706017	0.652	0.366	0	Venous
HLA-DRB5	0	1.687909464	0.568	0.283	0	Venous
HLA-DQB1	0	1.937068017	0.469	0.188	0	Venous
ADIRF	0	1.515788439	0.657	0.383	0	Venous
RAMP3	0	0.9280612382	0.778	0.506	0	Venous
HLA-DPA1	0	1.801661253	0.68	0.41	0	Venous
CLU	0	1.90197193	0.542	0.275	0	Venous
IL1R1	0	2.84620467	0.345	0.08	0	Venous
HLA-DRB1	0	1.621665073	0.792	0.529	0	Venous
HLA-DPB1	0	1.708920113	0.647	0.387	0	Venous
HLA-DMA	0	1.446700681	0.5	0.242	0	Venous
AQP1	0	1.007600098	0.76	0.505	0	Venous
SPARCL1	0	0.6699515405	0.91	0.656	0	Venous
TSPAN7	0	1.618459082	0.534	0.292	0	Venous
MEOX1	0	2.051419308	0.345	0.111	0	Venous
POSTN	0	3.119994772	0.294	0.063	0	Venous
ICAM1	0	1.485888548	0.617	0.403	0	Venous
TGFBR3	0	1.574958076	0.377	0.168	0	Venous
LIFR	0	1.540663539	0.371	0.164	0	Venous
VCAM1	0	2.476887233	0.306	0.099	0	Venous
OLFM1	0	2.019701943	0.328	0.122	0	Venous
SLCO2A1	0	0.8517972258	0.548	0.344	0	Venous
CD74	0	1.672079188	0.909	0.708	0	Venous
TPD52L1	0	2.210347308	0.287	0.086	0	Venous
CTSC	0	1.639940394	0.448	0.25	0	Venous
ITM2A	0	0.8084947451	0.584	0.387	0	Venous
NCOA7	0	1.499170508	0.578	0.391	0	Venous
CPXM2	0	1.759355428	0.315	0.131	0	Venous
PRCP	0	1.070053763	0.702	0.518	0	Venous
SLC2A3	0	0.7823176918	0.672	0.496	0	Venous
RASA4	0	1.591871262	0.327	0.151	0	Venous
IFITM1	0	0.6337474533	0.603	0.43	0	Venous
HAPLN3	0	1.269081538	0.38	0.209	0	Venous
JAM2	0	0.6349130958	0.512	0.344	0	Venous
NOSTRIN	0	0.932076605	0.406	0.239	0	Venous
RND1	0	1.115979431	0.374	0.208	0	Venous
LPCAT4	0	1.943931119	0.281	0.116	0	Venous
CSF2RB	0	1.745198256	0.301	0.137	0	Venous
CCDC69	0	1.284337006	0.361	0.198	0	Venous
VWF	0	0.7334075924	0.843	0.683	0	Venous
IER3	0	1.405971886	0.604	0.445	0	Venous
MAP3K8	0	1.194587762	0.387	0.229	0	Venous
CDC42EP3	0	0.8550569925	0.503	0.346	0	Venous
MCTP1	0	0.8691482525	0.496	0.339	0	Venous
NPDC1	0	0.6375390637	0.77	0.615	0	Venous
EVA1C	0	1.1488587	0.352	0.197	0	Venous
PKP4	0	1.015217535	0.422	0.267	0	Venous
ADM5	0	2.010217741	0.253	0.101	0	Venous
SNCG	0	0.7444967042	0.493	0.341	0	Venous
CSRP2	0	1.419034551	0.41	0.267	0	Venous
CDKN1A	0	0.8523567619	0.605	0.477	0	Venous
NPC2	0	1.411853619	0.695	0.571	0	Venous
ZFP36L1	0	0.8085515181	0.765	0.672	0	Venous
ETS2	0	0.6718719229	0.675	0.583	0	Venous
SOCS3	0	0.8111907978	0.72	0.634	0	Venous
IGFBP4	0	0.7848431165	0.805	0.756	0	Venous
NFKBIA	0	0.7743567882	0.793	0.756	0	Venous
EEF1B2	0	0.6277435187	0.758	0.728	0	Venous
CST3	0	0.8859064995	0.84	0.813	0	Venous
RPLP0	0	0.5932249436	0.878	0.869	0	Venous
RPL12	0	0.5455540626	0.943	0.936	0	Venous
RPL37	0	0.5409100629	0.939	0.932	0	Venous
RPL30	0	0.6150908024	0.93	0.926	0	Venous
NACA	0	0.5387147596	0.863	0.861	0	Venous
RPL7A	0	0.5186867629	0.912	0.91	0	Venous
RPS3A	0	0.5080990916	0.927	0.929	0	Venous
RPL32	0	0.5261134541	0.967	0.966	0	Venous
TPT1	0	0.6688856942	0.958	0.957	0	Venous
RPS23	0	0.5019692858	0.953	0.953	0	Venous
RPS8	0	0.5353663674	0.954	0.954	0	Venous
ZFP36	8.80E-306	0.5857876239	0.81	0.748	4.98E-301	Venous
RPL17	4.07E-300	0.8304420406	0.698	0.652	2.30E-295	Venous
UGCG	5.01E-300	1.013699176	0.45	0.32	2.84E-295	Venous
RALGAPA2	3.26E-296	1.083564467	0.351	0.211	1.85E-291	Venous
MATN2	2.12E-287	1.05962297	0.313	0.175	1.20E-282	Venous
HIPK3	1.30E-278	1.067383609	0.386	0.254	7.34E-274	Venous
PDK4	4.08E-269	1.034870498	0.373	0.235	2.31E-264	Venous
GNB2L1	9.90E-269	0.6916434081	0.532	0.428	5.61E-264	Venous
CYTH1	4.83E-268	1.001749864	0.371	0.238	2.73E-263	Venous
LDHA	1.09E-266	0.5358364334	0.711	0.672	6.14E-262	Venous
EEF1G	2.05E-266	0.9806184718	0.449	0.335	1.16E-261	Venous
FOXC1	2.45E-258	1.357466475	0.25	0.132	1.39E-253	Venous
TXNIP	4.77E-257	0.6389153013	0.63	0.491	2.70E-252	Venous
SDCBP	6.15E-249	0.5712865967	0.665	0.6	3.48E-244	Venous
MYOF	1.64E-246	1.062225616	0.316	0.191	9.27E-242	Venous
SOD2	3.97E-243	0.7865113882	0.514	0.411	2.25E-238	Venous
NFKBIZ	1.21E-241	0.7993006892	0.519	0.411	6.84E-237	Venous
GLTSCR2	2.97E-240	0.8830660674	0.41	0.289	1.68E-235	Venous
PDLIM1	1.44E-237	0.531737193	0.747	0.735	8.18E-233	Venous
NR2F2	1.12E-233	0.7000114549	0.448	0.314	6.34E-229	Venous
CMIP	7.28E-233	0.8407975652	0.474	0.355	4.12E-228	Venous
LGALS3	4.50E-230	0.5418441335	0.648	0.571	2.55E-225	Venous
ITGB4	6.27E-220	0.8280536344	0.366	0.241	3.55E-215	Venous
LITAF	1.37E-218	1.142539434	0.343	0.231	7.77E-214	Venous
DOC2B	4.51E-212	1.118226173	0.253	0.145	2.55E-207	Venous
SNHG8	8.68E-211	0.7247824703	0.511	0.406	4.91E-206	Venous
NME2	8.03E-208	0.5555392114	0.52	0.393	4.55E-203	Venous
TINAGL1	1.83E-203	0.6956804932	0.473	0.356	1.04E-198	Venous
C2CD4B	5.91E-203	1.329253758	0.329	0.222	3.35E-198	Venous
SERPINB1	2.19E-200	0.9187300913	0.382	0.275	1.24E-195	Venous
SPNS2	4.60E-200	1.042496191	0.306	0.195	2.60E-195	Venous
MKL2	1.38E-198	1.014703353	0.308	0.2	7.83E-194	Venous
CTNNAL1	1.26E-192	0.7894861409	0.333	0.224	7.16E-188	Venous
IFI44L	2.99E-191	0.8322765923	0.335	0.215	1.69E-186	Venous
LMCD1	3.02E-190	0.5760945824	0.524	0.419	1.71E-185	Venous
HSPA1B	2.24E-188	0.5100411398	0.589	0.456	1.27E-183	Venous
SH3BP5	9.35E-187	0.6386316254	0.511	0.412	5.29E-182	Venous
PERP	2.38E-185	0.9643071041	0.272	0.168	1.35E-180	Venous
NRN1	3.72E-184	0.8637207964	0.385	0.282	2.11E-179	Venous
ACTN1	4.29E-178	0.5292148367	0.598	0.515	2.43E-173	Venous
AHR	5.05E-177	0.702296497	0.413	0.304	2.86E-172	Venous
PLSCR1	3.79E-176	0.6461783563	0.537	0.461	2.14E-171	Venous
AC090498.1	4.74E-174	0.9362909854	0.366	0.263	2.68E-169	Venous
MT-ND4L	1.11E-170	0.5113339055	0.724	0.662	6.28E-166	Venous
ABLIM1	7.43E-170	0.7716035295	0.394	0.29	4.21E-165	Venous
EPS8	1.53E-160	0.7479581094	0.279	0.176	8.64E-156	Venous
IFI16	7.53E-159	0.5670780244	0.638	0.583	4.26E-154	Venous
ATF3	4.43E-158	0.596613669	0.457	0.354	2.51E-153	Venous
TNFRSF1A	2.20E-157	0.6777436336	0.527	0.457	1.25E-152	Venous
IRF1	6.77E-154	0.6762822355	0.526	0.444	3.84E-149	Venous
SYNGR2	2.24E-150	0.6560417902	0.475	0.39	1.27E-145	Venous
TCN2	7.45E-149	0.7616099068	0.321	0.222	4.22E-144	Venous
CEBPD	5.46E-143	0.5569084013	0.447	0.341	3.09E-138	Venous
SYNE2	2.19E-139	0.555425177	0.48	0.384	1.24E-134	Venous
FKBP11	1.88E-136	0.8953885309	0.271	0.183	1.07E-131	Venous
NAMPT	1.89E-135	0.5530306244	0.543	0.476	1.07E-130	Venous
ENTPD1	8.97E-130	0.6047962561	0.459	0.362	5.08E-125	Venous
MYLK	4.36E-124	0.7722309964	0.256	0.171	2.47E-119	Venous
ZFAND5	5.00E-122	0.5539313133	0.566	0.517	2.83E-117	Venous
MALL	1.43E-120	0.5561337618	0.445	0.353	8.11E-116	Venous
CLDN15	5.66E-120	0.6764095003	0.25	0.165	3.21E-115	Venous
SELM	6.31E-118	0.5805515146	0.365	0.273	3.58E-113	Venous
INPP1	1.94E-117	0.7075980753	0.341	0.258	1.10E-112	Venous
TNFAIP3	6.90E-117	0.8069119883	0.409	0.327	3.91E-112	Venous
UPP1	1.17E-116	0.5842787363	0.487	0.397	6.62E-112	Venous
KLF7	2.03E-111	0.7049141469	0.317	0.235	1.15E-106	Venous
NUAK1	6.86E-109	0.6939573149	0.344	0.259	3.89E-104	Venous
KLF9	5.02E-107	0.5823970909	0.415	0.334	2.85E-102	Venous
SLC25A25	1.35E-105	0.8157861381	0.262	0.186	7.64E-101	Venous
TNFRSF10D	7.05E-100	0.5846780031	0.333	0.249	3.99E-95	Venous
TMEM2	4.88E-94	0.5942881859	0.292	0.213	2.76E-89	Venous
SLC29A1	6.02E-94	0.5743677862	0.385	0.308	3.41E-89	Venous
TMEM70	1.23E-93	0.8368931491	0.308	0.239	6.97E-89	Venous
DNAJB4	4.11E-90	0.6326309878	0.434	0.369	2.33E-85	Venous
GBP2	9.39E-90	0.6082066864	0.336	0.261	5.32E-85	Venous
CRTAP	1.44E-86	0.5468915042	0.43	0.371	8.14E-82	Venous
RCAN1	1.52E-85	0.6195316763	0.448	0.389	8.60E-81	Venous
CFI	1.60E-84	0.5445047211	0.416	0.352	9.05E-80	Venous
TOMM5	2.22E-80	0.6071718152	0.395	0.336	1.26E-75	Venous
TNFRSF10B	5.77E-79	0.6807462685	0.293	0.227	3.27E-74	Venous
BCL3	8.25E-79	0.6632604014	0.307	0.24	4.67E-74	Venous
ADAMTS9	1.31E-77	0.5649462406	0.441	0.379	7.42E-73	Venous
SOCS2	1.15E-76	0.5420021373	0.343	0.275	6.49E-72	Venous
ARRDC3	6.52E-76	0.5635404852	0.376	0.308	3.69E-71	Venous
RAPGEF3	5.08E-75	0.6854864269	0.282	0.214	2.88E-70	Venous
TCEB1	6.78E-74	0.5058586616	0.345	0.273	3.84E-69	Venous
DAAM1	2.24E-69	0.59154272	0.349	0.287	1.27E-64	Venous
YPEL2	4.01E-69	0.5507987426	0.399	0.338	2.27E-64	Venous
PHLDA1	1.97E-68	0.6178528435	0.379	0.323	1.11E-63	Venous
LAMA5	2.81E-67	0.5465018228	0.338	0.271	1.59E-62	Venous
ARL5B	3.36E-67	0.6452235984	0.252	0.192	1.90E-62	Venous
SNTB2	7.14E-65	0.5185867688	0.381	0.323	4.04E-60	Venous
MAT2A	4.20E-64	0.6411007085	0.327	0.271	2.38E-59	Venous
GNB4	2.75E-63	0.6302296737	0.268	0.21	1.56E-58	Venous
TPST2	1.10E-54	0.628900568	0.303	0.251	6.23E-50	Venous
ANXA4	2.14E-50	0.6156578651	0.279	0.229	1.21E-45	Venous
MTRNR2L12	5.39E-50	0.5405771132	0.278	0.225	3.05E-45	Venous
MYC	1.18E-45	0.5284042734	0.359	0.31	6.66E-41	Venous
EBF1	1.86E-45	0.5319988041	0.26	0.212	1.05E-40	Venous
TRIB1	1.35E-41	0.5074965357	0.316	0.27	7.62E-37	Venous
IMPDH2	1.75E-41	0.5323526885	0.297	0.253	9.91E-37	Venous
SAV1	3.00E-36	0.5107672962	0.283	0.241	1.70E-31	Venous
SAMHD1	3.96E-36	0.5105310378	0.262	0.219	2.24E-31	Venous
GJA4	0	4.413129627	0.703	0.061	0	Arterial
SEMA3G	0	5.44150825	0.619	0.02	0	Arterial
HEY1	0	3.057866262	0.666	0.132	0	Arterial
CXCL12	0	3.220179602	0.699	0.169	0	Arterial
IGFBP3	0	2.667263277	0.716	0.21	0	Arterial
FBLN5	0	6.091346004	0.49	0.015	0	Arterial
GJA5	0	6.355359893	0.482	0.012	0	Arterial
ARL15	0	2.930971367	0.597	0.15	0	Arterial
EFNB2	0	2.137589852	0.726	0.287	0	Arterial
MECOM	0	2.474782488	0.614	0.209	0	Arterial
SLC9A3R2	0	2.192408681	0.877	0.483	0	Arterial
JAG2	0	2.10269056	0.592	0.219	0	Arterial
PLLP	0	3.712869478	0.409	0.045	0	Arterial
PLPP1	0	2.254845633	0.722	0.36	0	Arterial
PCSK5	0	4.601500347	0.399	0.038	0	Arterial
SRGN	0	2.243856738	0.902	0.543	0	Arterial
NOTCH4	0	1.325879896	0.677	0.324	0	Arterial
PPA1	0	2.146858476	0.749	0.403	0	Arterial
DLL4	0	1.788295346	0.553	0.213	0	Arterial
LTBP4	0	3.279409219	0.461	0.124	0	Arterial
PODXL	0	1.47934179	0.789	0.455	0	Arterial
VEGFC	0	2.310055965	0.461	0.132	0	Arterial
ALPL	0	3.02728691	0.403	0.08	0	Arterial
IGF2	0	2.796841399	0.442	0.12	0	Arterial
JAG1	0	2.320466595	0.608	0.289	0	Arterial
C10orf10	0	3.308366921	0.434	0.12	0	Arterial
ATP13A3	0	3.061344556	0.426	0.113	0	Arterial
PPP1R14A	0	4.487625462	0.334	0.023	0	Arterial
TSPAN2	0	3.803527485	0.347	0.04	0	Arterial
AIF1L	0	2.75645826	0.374	0.068	0	Arterial
SOX17	0	1.560685876	0.583	0.277	0	Arterial
OCIAD2	0	1.904649872	0.624	0.329	0	Arterial
ARHGAP4	0	2.447827919	0.372	0.087	0	Arterial
ADGRF5	0	1.51442563	0.645	0.364	0	Arterial
THSD7A	0	1.748426493	0.53	0.252	0	Arterial
HES4	0	1.550222043	0.469	0.192	0	Arterial
ICAM2	0	1.672273935	0.759	0.484	0	Arterial
SULF1	0	3.952467149	0.32	0.045	0	Arterial
KCTD12	0	2.044094576	0.624	0.353	0	Arterial
MAST4	0	1.552720755	0.615	0.345	0	Arterial
NUDT4	0	2.015582246	0.492	0.222	0	Arterial
ACE	0	1.820650663	0.419	0.152	0	Arterial
FN1	0	1.665639267	0.637	0.371	0	Arterial
ASS1	0	1.847318888	0.434	0.172	0	Arterial
PIK3R3	0	1.201715339	0.562	0.305	0	Arterial
PTP4A3	0	1.61114539	0.457	0.201	0	Arterial
LPCAT2	0	1.777577596	0.424	0.169	0	Arterial
ADAMTS1	0	1.327914723	0.619	0.367	0	Arterial
CD46	0	1.246279683	0.611	0.365	0	Arterial
ATP2A3	0	3.873014396	0.269	0.024	0	Arterial
S100A4	0	1.828518437	0.453	0.212	0	Arterial
PDCD4	0	1.521451674	0.549	0.311	0	Arterial
ENPP2	0	1.390133633	0.437	0.202	0	Arterial
TMEM47	0	1.469978592	0.36	0.125	0	Arterial
PREX1	0	1.659528764	0.361	0.127	0	Arterial
SOS1	0	1.712880754	0.398	0.165	0	Arterial
HEG1	0	1.101619173	0.679	0.447	0	Arterial
SYNJ2	0	1.847855634	0.381	0.149	0	Arterial
CD58	0	1.912494073	0.372	0.14	0	Arterial
PTPRB	0	1.173324533	0.719	0.488	0	Arterial
EMP3	0	1.434842533	0.404	0.174	0	Arterial
ADAMTS6	0	1.751785781	0.39	0.16	0	Arterial
MSX1	0	1.74504536	0.368	0.138	0	Arterial
BST2	0	1.132378779	0.779	0.551	0	Arterial
ITSN2	0	1.378559334	0.484	0.256	0	Arterial
SIPA1L2	0	1.940132313	0.325	0.099	0	Arterial
JAM21	0	1.134128124	0.633	0.408	0	Arterial
GFOD1	0	1.460090886	0.417	0.193	0	Arterial
CCDC3	0	1.562319603	0.404	0.181	0	Arterial
STMN1	0	1.287125011	0.677	0.455	0	Arterial
AZIN1	0	1.688016494	0.408	0.186	0	Arterial
PIK3C2B	0	1.805257243	0.357	0.137	0	Arterial
MMP2	0	1.506000982	0.565	0.346	0	Arterial
RHOB	0	1.479848426	0.865	0.647	0	Arterial
BTNL9	0	1.313539935	0.301	0.085	0	Arterial
IFI27L2	0	1.455409224	0.378	0.165	0	Arterial
FBLIM1	0	1.858091336	0.338	0.132	0	Arterial
CLDN5	0	1.141541934	0.825	0.622	0	Arterial
SERPINE2	0	2.838258182	0.269	0.067	0	Arterial
UTRN	0	1.177697528	0.659	0.457	0	Arterial
RNF144B	0	2.5277474	0.26	0.059	0	Arterial
GLUL	0	1.76460267	0.59	0.389	0	Arterial
COBLL1	0	2.131090104	0.294	0.096	0	Arterial
FUT8	0	2.658181895	0.254	0.059	0	Arterial
ATP1A1	0	1.015971331	0.746	0.551	0	Arterial
ASRGL1	0	1.896794957	0.32	0.127	0	Arterial
STOM	0	1.308814101	0.86	0.674	0	Arterial
ESAM	0	0.9168052161	0.794	0.609	0	Arterial
TM6SF1	0	2.08756549	0.273	0.088	0	Arterial
EPAS1	0	1.055555085	0.868	0.683	0	Arterial
SOX13	0	1.913129937	0.257	0.08	0	Arterial
IFI27	0	0.9875010415	0.979	0.823	0	Arterial
A2M	0	1.107504232	0.944	0.794	0	Arterial
CLEC14A	0	0.9578045498	0.799	0.652	0	Arterial
SAT1	0	2.187599721	0.902	0.768	0	Arterial
CAV1	0	1.140076717	0.866	0.733	0	Arterial
TM4SF1	0	1.023794131	0.931	0.823	0	Arterial
SRP14	0	1.826526448	0.977	0.893	0	Arterial
RAMP2	0	0.7804623265	0.918	0.844	0	Arterial
CFH	1.12E-306	1.26098933	0.51	0.277	6.34E-302	Arterial
SYT11	1.23E-292	1.93237422	0.255	0.089	6.94E-288	Arterial
MAP4	3.62E-289	1.202194467	0.571	0.362	2.05E-284	Arterial
FBLN2	4.82E-289	1.754078427	0.331	0.141	2.73E-284	Arterial
CALM1	2.28E-288	0.5536246887	0.892	0.823	1.29E-283	Arterial
PCMTD1	1.60E-286	1.314688059	0.531	0.318	9.07E-282	Arterial
CRYBG3	2.45E-280	1.544014662	0.454	0.241	1.39E-275	Arterial
IFITM3	1.62E-279	0.5308210753	0.983	0.957	9.19E-275	Arterial
EDN1	7.54E-275	1.139571344	0.485	0.252	4.27E-270	Arterial
CRIP2	2.37E-269	0.6141404495	0.9	0.832	1.34E-264	Arterial
FAM107A	4.35E-269	1.638456642	0.384	0.186	2.46E-264	Arterial
ELN	8.55E-267	1.69490284	0.339	0.15	4.84E-262	Arterial
SYNPO	8.16E-264	1.142838593	0.559	0.349	4.62E-259	Arterial
MMRN2	1.88E-262	0.9792606145	0.655	0.449	1.07E-257	Arterial
LIMCH1	6.02E-252	1.132984458	0.453	0.242	3.41E-247	Arterial
LAP3	1.28E-251	1.046935209	0.625	0.441	7.24E-247	Arterial
ID1	2.31E-251	0.8752455929	0.792	0.613	1.31E-246	Arterial
CAPZA2	1.36E-250	0.9575884023	0.679	0.514	7.73E-246	Arterial
SLC6A6	6.24E-247	1.743863174	0.318	0.143	3.54E-242	Arterial
AGPAT1	1.10E-246	1.458903878	0.344	0.16	6.24E-242	Arterial
GABARAPL2	3.40E-245	0.8131233171	0.746	0.626	1.92E-240	Arterial
LRP6	5.89E-245	1.435471262	0.313	0.136	3.34E-240	Arterial
PALMD	8.26E-243	0.9714077784	0.678	0.486	4.68E-238	Arterial
DDIT4	1.52E-242	0.8973760856	0.639	0.421	8.64E-238	Arterial
CDH5	7.74E-241	0.8333062003	0.729	0.587	4.38E-236	Arterial
SWAP70	5.96E-240	0.9940706646	0.633	0.459	3.37E-235	Arterial
EFNA1	7.57E-238	1.008858005	0.627	0.438	4.29E-233	Arterial
KCNN3	1.17E-237	1.360547722	0.311	0.135	6.61E-233	Arterial
LIMA1	3.98E-237	1.098031827	0.552	0.353	2.25E-232	Arterial
TAGLN2	2.89E-234	0.6021146974	0.865	0.777	1.63E-229	Arterial
GNAS	1.05E-232	0.7113263421	0.822	0.72	5.96E-228	Arterial
HBEGF	4.46E-229	1.225683103	0.471	0.272	2.53E-224	Arterial
NPTN	1.80E-226	1.370812784	0.324	0.15	1.02E-221	Arterial
TBC1D1	3.64E-223	1.343281961	0.404	0.22	2.06E-218	Arterial
NES	1.54E-222	1.193950286	0.4	0.208	8.74E-218	Arterial
IFI6	1.26E-221	0.7513661822	0.728	0.537	7.12E-217	Arterial
AES	2.29E-219	1.053435225	0.562	0.386	1.30E-214	Arterial
UNC5B	1.04E-218	1.057410732	0.306	0.132	5.90E-214	Arterial
POMP	4.05E-217	0.6890540213	0.805	0.695	2.29E-212	Arterial
CFAP36	3.27E-216	1.711485581	0.359	0.189	1.85E-211	Arterial
ADAM15	7.97E-216	0.8604688357	0.699	0.543	4.51E-211	Arterial
CD9	7.90E-209	0.5691610588	0.831	0.701	4.47E-204	Arterial
CX3CL1	1.69E-205	1.365132957	0.325	0.155	9.56E-201	Arterial
DHRS3	2.22E-203	1.143561371	0.266	0.112	1.26E-198	Arterial
PTPRM	4.49E-202	1.046874317	0.52	0.336	2.54E-197	Arterial
PRKCDBP	1.74E-201	1.250864582	0.481	0.309	9.85E-197	Arterial
RDX	1.48E-199	0.9154717694	0.689	0.543	8.35E-195	Arterial
MRPL33	4.65E-198	0.8696934603	0.695	0.563	2.63E-193	Arterial
LIMS2	1.31E-197	0.9475117424	0.556	0.363	7.44E-193	Arterial
S1PR1	1.78E-196	0.903455273	0.65	0.5	1.01E-191	Arterial
ATP5J	4.10E-196	1.101346998	0.522	0.362	2.32E-191	Arterial
RNASE1	4.36E-196	0.5170775622	0.864	0.692	2.47E-191	Arterial
RFTN1	1.77E-195	1.381763821	0.326	0.163	1.00E-190	Arterial
TSC22D1	1.63E-194	0.5890599241	0.802	0.666	9.21E-190	Arterial
CYYR1	2.26E-192	0.7924942589	0.64	0.469	1.28E-187	Arterial
FLT1	4.80E-192	0.5738114894	0.674	0.482	2.72E-187	Arterial
TUSC3	6.18E-192	1.563983121	0.314	0.158	3.50E-187	Arterial
PLS3	1.83E-190	1.16479176	0.543	0.374	1.04E-185	Arterial
RRAS	8.28E-190	1.399089635	0.337	0.174	4.69E-185	Arterial
UACA	5.39E-188	0.9796305545	0.551	0.381	3.05E-183	Arterial
PKN3	1.17E-187	1.356950558	0.299	0.144	6.64E-183	Arterial
ORAI1	9.04E-186	1.247371341	0.373	0.206	5.12E-181	Arterial
GATA2	1.42E-185	1.232811854	0.361	0.192	8.03E-181	Arterial
EPHA4	6.18E-185	1.286482832	0.297	0.141	3.50E-180	Arterial
BTG2	1.57E-184	1.106833213	0.56	0.387	8.87E-180	Arterial
EFCAB14	2.33E-184	1.086551031	0.445	0.272	1.32E-179	Arterial
C9orf3	1.15E-183	1.286506822	0.397	0.229	6.51E-179	Arterial
IFITM11	1.11E-179	0.9967610676	0.674	0.501	6.27E-175	Arterial
C8orf33	2.71E-178	1.276075673	0.328	0.169	1.53E-173	Arterial
ATP1B3	4.43E-177	0.8726589228	0.665	0.537	2.51E-172	Arterial
NR4A1	2.17E-175	1.025570975	0.626	0.468	1.23E-170	Arterial
ADD1	4.45E-174	1.039383102	0.495	0.33	2.52E-169	Arterial
CD93	2.73E-173	0.6483659729	0.766	0.634	1.55E-168	Arterial
RILPL2	1.14E-172	1.069248449	0.448	0.28	6.45E-168	Arterial
KLF2	7.87E-171	0.7587014716	0.761	0.614	4.46E-166	Arterial
IFITM2	3.68E-167	0.5217582856	0.921	0.876	2.09E-162	Arterial
MRPL17	1.59E-166	1.092827818	0.472	0.314	8.99E-162	Arterial
HSPA12B	3.84E-166	1.080858032	0.376	0.213	2.17E-161	Arterial
GPRC5B	9.95E-165	1.138743376	0.338	0.181	5.64E-160	Arterial
IL32	1.91E-163	0.5892645312	0.638	0.444	1.08E-158	Arterial
MCTP11	5.47E-162	0.8988168382	0.571	0.403	3.10E-157	Arterial
ACTN4	1.81E-160	0.6652866439	0.713	0.587	1.03E-155	Arterial
FURIN	1.31E-157	1.151187365	0.318	0.169	7.44E-153	Arterial
FABP4	1.44E-156	0.782772337	0.373	0.212	8.17E-152	Arterial
SSFA2	1.69E-156	1.11454806	0.446	0.29	9.55E-152	Arterial
FES	1.14E-154	1.266450618	0.301	0.157	6.43E-150	Arterial
EMP2	1.62E-154	0.7544740493	0.626	0.484	9.16E-150	Arterial
DST	2.45E-154	1.056725104	0.416	0.259	1.39E-149	Arterial
MGP	2.49E-154	0.8014610423	0.815	0.706	1.41E-149	Arterial
CYB5R3	7.87E-154	0.6331446007	0.725	0.619	4.46E-149	Arterial
RHOC	3.34E-153	0.6786848904	0.754	0.664	1.89E-148	Arterial
LRRFIP1	2.49E-152	0.6387196378	0.702	0.569	1.41E-147	Arterial
DUSP1	3.59E-152	0.6605340458	0.875	0.823	2.03E-147	Arterial
TXNIP1	9.64E-152	0.5233491825	0.721	0.545	5.46E-147	Arterial
LEPR	1.97E-151	1.310430892	0.292	0.151	1.12E-146	Arterial
F11R	7.92E-151	1.084829529	0.356	0.204	4.48E-146	Arterial
ARGLU1	2.17E-148	0.7878727921	0.728	0.608	1.23E-143	Arterial
FILIP1	3.15E-148	1.04699227	0.346	0.193	1.78E-143	Arterial
RAPGEF1	1.65E-147	1.031777178	0.335	0.184	9.33E-143	Arterial
ERC1	2.04E-146	1.215305122	0.308	0.167	1.15E-141	Arterial
FRYL	1.58E-145	0.9410490666	0.449	0.289	8.97E-141	Arterial
IER2	2.55E-145	0.6472939435	0.798	0.718	1.44E-140	Arterial
PREX2	3.43E-145	1.023150775	0.45	0.297	1.94E-140	Arterial
LTC4S	6.50E-145	1.585006994	0.263	0.134	3.68E-140	Arterial
PCDH1	3.95E-144	1.114896807	0.308	0.166	2.24E-139	Arterial
SESTD1	9.96E-144	1.222122536	0.286	0.15	5.64E-139	Arterial
RALGAPA1	4.21E-143	1.234347199	0.278	0.143	2.38E-138	Arterial
RGS3	9.66E-143	0.701756901	0.505	0.334	5.47E-138	Arterial
CD151	1.22E-142	0.6464918141	0.735	0.649	6.91E-138	Arterial
INSR	2.34E-142	0.5968999559	0.586	0.425	1.33E-137	Arterial
PGRMC2	1.14E-141	1.383667531	0.291	0.157	6.47E-137	Arterial
ISG15	2.32E-141	0.5066162245	0.657	0.499	1.31E-136	Arterial
RBP7	8.31E-140	0.8788889142	0.437	0.272	4.71E-135	Arterial
STC1	9.06E-140	0.8343850287	0.448	0.275	5.13E-135	Arterial
NUDT14	2.00E-139	0.9199781599	0.482	0.332	1.13E-134	Arterial
KIAA1147	3.47E-139	1.130712931	0.262	0.13	1.96E-134	Arterial
IFI44L1	3.95E-139	0.7943004366	0.423	0.26	2.23E-134	Arterial
CSRP1	4.86E-139	0.9761267178	0.456	0.308	2.75E-134	Arterial
CYSTM1	4.65E-138	0.8923190025	0.5	0.35	2.63E-133	Arterial
SEC11C	1.10E-137	1.092141881	0.395	0.249	6.24E-133	Arterial
CD34	2.14E-137	0.6461316842	0.723	0.597	1.21E-132	Arterial
LMCD11	5.83E-136	0.7801418489	0.604	0.458	3.30E-131	Arterial
AMD1	2.13E-135	1.396859526	0.398	0.26	1.21E-130	Arterial
SEPW1	4.22E-134	0.8631499433	0.565	0.421	2.39E-129	Arterial
CXCL2	9.82E-134	1.094125777	0.434	0.286	5.56E-129	Arterial
MET	2.07E-132	1.334895766	0.275	0.146	1.17E-127	Arterial
ABL2	2.66E-131	0.9109955829	0.546	0.402	1.51E-126	Arterial
TACC1	5.76E-130	0.6290202264	0.634	0.504	3.26E-125	Arterial
TNFRSF1B	5.53E-126	0.8724087722	0.371	0.223	3.13E-121	Arterial
LTA4H	1.63E-125	1.112201573	0.322	0.188	9.25E-121	Arterial
CLIC4	1.19E-124	0.7114269342	0.595	0.453	6.74E-120	Arterial
MMP28	5.07E-124	1.085670406	0.254	0.13	2.87E-119	Arterial
MYL9	5.08E-124	1.090315246	0.43	0.286	2.88E-119	Arterial
GIMAP1	7.21E-124	0.9002199219	0.459	0.317	4.08E-119	Arterial
BCAM	5.08E-120	0.6026480855	0.699	0.572	2.88E-115	Arterial
KIAA1671	2.67E-119	1.144967452	0.267	0.145	1.51E-114	Arterial
SPTAN1	4.07E-119	0.7532496796	0.578	0.453	2.31E-114	Arterial
ARL6IP5	7.62E-119	0.7653468204	0.558	0.433	4.31E-114	Arterial
ADIPOR2	2.03E-118	1.097004143	0.269	0.146	1.15E-113	Arterial
XAF1	4.12E-117	0.7312369137	0.444	0.293	2.33E-112	Arterial
TUBA4A	1.72E-114	1.171244776	0.263	0.145	9.76E-110	Arterial
IFNGR1	1.28E-113	0.8949564829	0.472	0.337	7.23E-109	Arterial
MAP1B	1.67E-112	0.9064811569	0.452	0.317	9.44E-108	Arterial
PTTG1IP	7.61E-112	0.6050119316	0.668	0.565	4.31E-107	Arterial
SHE	2.82E-110	0.8999090578	0.364	0.231	1.60E-105	Arterial
OAZ2	2.12E-108	0.9976628896	0.455	0.325	1.20E-103	Arterial
INPP5K	2.82E-108	1.05587609	0.281	0.16	1.60E-103	Arterial
DYNLT3	5.89E-108	1.024272675	0.274	0.154	3.34E-103	Arterial
AKR1B1	1.23E-107	1.109730495	0.281	0.162	6.98E-103	Arterial
HERPUD1	3.61E-106	0.7830395162	0.588	0.467	2.05E-101	Arterial
TIMP3	1.93E-105	0.639708266	0.677	0.572	1.09E-100	Arterial
IGFBP2	3.24E-105	1.005759738	0.308	0.182	1.84E-100	Arterial
CDC42BPA	1.75E-104	0.9582693241	0.375	0.248	9.90E-100	Arterial
PTPN14	4.09E-104	0.853184037	0.38	0.247	2.32E-99	Arterial
ABRACL	8.69E-104	0.8727922022	0.382	0.252	4.92E-99	Arterial
MTUS1	3.98E-103	0.6513697279	0.605	0.488	2.26E-98	Arterial
TMEM30A	8.78E-103	0.8175053581	0.464	0.335	4.97E-98	Arterial
PKIG	7.77E-102	0.7670522468	0.523	0.411	4.40E-97	Arterial
UBE2J1	7.77E-102	0.7438729174	0.511	0.388	4.40E-97	Arterial
NR4A2	3.63E-101	0.9562772716	0.389	0.259	2.06E-96	Arterial
HSD17B12	6.25E-101	0.9214134147	0.421	0.298	3.54E-96	Arterial
ABCB1	2.30E-100	1.139842871	0.254	0.141	1.30E-95	Arterial
MIDN	5.09E-100	0.6700674547	0.593	0.475	2.88E-95	Arterial
TSPO	7.59E-100	0.5041938455	0.731	0.656	4.30E-95	Arterial
FILIP1L	4.11E-98	1.006505645	0.35	0.227	2.32E-93	Arterial
IFNAR2	7.21E-98	0.9443238437	0.309	0.19	4.08E-93	Arterial
RALB	1.39E-97	0.8152351803	0.438	0.314	7.88E-93	Arterial
CLEC3B	3.16E-97	0.9695124472	0.317	0.195	1.79E-92	Arterial
ARL5A	3.64E-97	0.85959418	0.393	0.272	2.06E-92	Arterial
STX12	2.47E-95	0.8347731386	0.413	0.288	1.40E-90	Arterial
C10orf54	2.03E-94	0.8492123416	0.28	0.164	1.15E-89	Arterial
GADD45B	4.65E-94	0.7486233859	0.688	0.597	2.63E-89	Arterial
PELI1	4.32E-92	0.9169294791	0.417	0.298	2.45E-87	Arterial
TNFRSF4	1.96E-91	0.6284938813	0.335	0.207	1.11E-86	Arterial
CTTNBP2NL	2.08E-91	0.8186780887	0.393	0.268	1.18E-86	Arterial
ARHGEF2	2.55E-91	0.940353676	0.284	0.171	1.44E-86	Arterial
VASH1	6.55E-91	0.9302444598	0.251	0.143	3.71E-86	Arterial
EGR1	1.45E-90	0.7734574512	0.58	0.465	8.22E-86	Arterial
ARID5A	2.99E-90	0.86499399	0.389	0.266	1.69E-85	Arterial
CRIP1	8.95E-90	0.8636188532	0.442	0.317	5.07E-85	Arterial
NTPCR	1.06E-89	0.9887931211	0.278	0.168	5.99E-85	Arterial
PAPSS1	1.36E-89	1.028321427	0.296	0.185	7.72E-85	Arterial
CPNE2	1.79E-88	0.8235169364	0.316	0.199	1.01E-83	Arterial
RAPGEF5	2.24E-86	0.6574569012	0.452	0.328	1.27E-81	Arterial
ARL2BP	2.29E-86	0.7088091448	0.443	0.326	1.30E-81	Arterial
PTRF	3.97E-86	0.5971722987	0.529	0.403	2.25E-81	Arterial
LEPROTL1	7.87E-86	0.7888620407	0.39	0.27	4.46E-81	Arterial
SOX18	1.58E-85	0.6741873557	0.547	0.425	8.94E-81	Arterial
TSPAN13	1.61E-85	0.8759101576	0.441	0.331	9.11E-81	Arterial
NGFRAP1	2.71E-85	0.6429312757	0.413	0.288	1.53E-80	Arterial
SMS	1.24E-84	0.8032741289	0.265	0.155	7.04E-80	Arterial
DHRS7B	1.01E-82	0.8967211996	0.272	0.167	5.72E-78	Arterial
RPS6KA2	5.21E-81	0.7058383206	0.432	0.315	2.95E-76	Arterial
SRP72	3.73E-79	0.7696020353	0.417	0.309	2.11E-74	Arterial
TGOLN2	1.17E-78	0.6609527682	0.477	0.366	6.65E-74	Arterial
KLF4	1.78E-78	0.5587871379	0.614	0.502	1.01E-73	Arterial
ILK	2.34E-78	0.7296889532	0.419	0.309	1.32E-73	Arterial
SLFN5	1.25E-77	0.6893996582	0.417	0.3	7.06E-73	Arterial
EXOC6	2.41E-77	0.9825228573	0.278	0.176	1.36E-72	Arterial
PLOD1	3.58E-77	0.8303676375	0.338	0.228	2.03E-72	Arterial
APBB2	4.42E-77	0.6864239126	0.319	0.208	2.50E-72	Arterial
MYO1C	7.90E-77	0.6641077557	0.444	0.331	4.47E-72	Arterial
LGALS31	2.94E-76	0.50429458	0.686	0.602	1.67E-71	Arterial
GAS6	5.40E-76	0.5830476862	0.422	0.3	3.06E-71	Arterial
NCKAP1	2.66E-75	0.6658087365	0.448	0.335	1.51E-70	Arterial
TTC28	2.73E-75	0.7964015437	0.294	0.188	1.55E-70	Arterial
CASKIN2	5.81E-75	0.7077942721	0.3	0.192	3.29E-70	Arterial
MALL1	1.42E-74	0.5873331457	0.504	0.389	8.03E-70	Arterial
CLDN151	2.98E-74	0.9996772846	0.302	0.198	1.69E-69	Arterial
CMTM8	4.08E-74	0.7791993883	0.294	0.189	2.31E-69	Arterial
MANSC1	5.30E-74	0.8483267959	0.315	0.211	3.00E-69	Arterial
HPCAL1	1.49E-73	0.6571854887	0.41	0.296	8.41E-69	Arterial
SNX3	2.02E-73	0.5403750588	0.726	0.666	1.14E-68	Arterial
PPP1CB	5.05E-73	0.707884749	0.474	0.364	2.86E-68	Arterial
IFIT3	7.40E-73	0.6978464694	0.299	0.192	4.19E-68	Arterial
HMOX2	1.26E-72	0.7744127152	0.384	0.279	7.14E-68	Arterial
CCSER2	4.51E-71	0.7761698458	0.328	0.224	2.55E-66	Arterial
FBN1	9.41E-70	0.7195141737	0.359	0.251	5.33E-65	Arterial
GABARAPL1	8.55E-69	0.6955829788	0.347	0.243	4.84E-64	Arterial
SYNGR21	3.40E-68	0.5544469825	0.531	0.422	1.92E-63	Arterial
VOPP1	5.62E-68	0.7169668484	0.359	0.255	3.19E-63	Arterial
MX1	1.52E-67	0.615339338	0.371	0.261	8.60E-63	Arterial
TMEM109	4.42E-67	0.563653433	0.52	0.425	2.50E-62	Arterial
NEDD9	3.24E-66	0.5427361114	0.572	0.471	1.83E-61	Arterial
KRT10	4.84E-66	0.5585090264	0.569	0.476	2.74E-61	Arterial
NOTCH1	5.15E-66	0.703993896	0.386	0.282	2.91E-61	Arterial
CPNE8	1.74E-65	0.6972797848	0.366	0.262	9.87E-61	Arterial
EPS81	6.25E-65	0.7750424958	0.321	0.218	3.54E-60	Arterial
LINC00152	5.41E-64	0.8575016036	0.256	0.162	3.06E-59	Arterial
COX17	7.27E-64	0.5514881974	0.541	0.433	4.12E-59	Arterial
CMTM6	9.69E-64	0.647908668	0.409	0.306	5.49E-59	Arterial
PLCB1	2.59E-63	0.6584700079	0.367	0.264	1.47E-58	Arterial
PSIP1	5.90E-62	0.6549730027	0.423	0.325	3.34E-57	Arterial
EOGT	5.98E-62	0.7913226522	0.256	0.164	3.39E-57	Arterial
EVL	3.49E-61	0.859535805	0.277	0.185	1.98E-56	Arterial
WARS	4.08E-61	0.6719776415	0.479	0.383	2.31E-56	Arterial
ATP5G3	3.00E-60	0.5625377561	0.384	0.278	1.70E-55	Arterial
AAED1	6.00E-60	0.8636115908	0.286	0.194	3.40E-55	Arterial
MTCH1	1.58E-59	0.544652845	0.534	0.448	8.94E-55	Arterial
FEZ2	2.15E-59	0.5833653602	0.487	0.399	1.22E-54	Arterial
BCAP29	6.36E-59	0.5559817786	0.497	0.406	3.60E-54	Arterial
TCN21	6.93E-59	0.6162229497	0.366	0.263	3.93E-54	Arterial
TPM1	2.15E-58	0.5484467808	0.412	0.308	1.22E-53	Arterial
FLNB	3.35E-58	0.5942829653	0.485	0.391	1.89E-53	Arterial
IQGAP1	8.41E-58	0.5160866229	0.55	0.463	4.76E-53	Arterial
PTPN12	1.07E-57	0.6186773085	0.444	0.349	6.07E-53	Arterial
ZDHHC20	3.72E-57	0.9618077312	0.257	0.171	2.11E-52	Arterial
NRN11	6.51E-57	0.5782703508	0.424	0.325	3.68E-52	Arterial
NDFIP1	1.18E-56	0.519327198	0.521	0.43	6.66E-52	Arterial
IFNAR1	1.38E-56	0.6132400483	0.363	0.268	7.79E-52	Arterial
ARMCX3	2.08E-56	0.6284114371	0.366	0.271	1.18E-51	Arterial
MOB2	3.54E-56	0.6008746475	0.385	0.287	2.00E-51	Arterial
CDC42EP1	1.16E-55	0.5858162088	0.344	0.246	6.57E-51	Arterial
ZBTB38	1.25E-55	0.5829635096	0.415	0.318	7.09E-51	Arterial
AP1S2	1.97E-55	0.539774067	0.479	0.389	1.12E-50	Arterial
PHLDB1	2.13E-55	0.5609908975	0.263	0.171	1.21E-50	Arterial
SP100	8.48E-55	0.5513973385	0.496	0.406	4.80E-50	Arterial
PDGFB	1.55E-54	0.6253666399	0.325	0.227	8.77E-50	Arterial
DOCK9	1.70E-54	0.5047335055	0.496	0.4	9.61E-50	Arterial
HSPA2	2.78E-54	0.6191903418	0.281	0.19	1.57E-49	Arterial
ATP8B1	3.06E-54	0.7781120386	0.274	0.186	1.73E-49	Arterial
APOL3	3.31E-54	0.7231603926	0.301	0.211	1.88E-49	Arterial
TMEM184B	4.95E-53	0.5702867389	0.348	0.252	2.81E-48	Arterial
BGN	1.02E-52	0.8653713372	0.347	0.257	5.76E-48	Arterial
LRRC8A	1.49E-52	0.6074962891	0.352	0.257	8.43E-48	Arterial
MGAT1	8.31E-52	0.5322424627	0.46	0.37	4.70E-47	Arterial
COMMD2	1.68E-51	0.5515147438	0.301	0.211	9.49E-47	Arterial
SELK	1.70E-51	0.532382527	0.383	0.284	9.61E-47	Arterial
NOS3	2.85E-51	0.6364670661	0.296	0.205	1.61E-46	Arterial
TMBIM1	5.95E-51	0.576560529	0.391	0.299	3.37E-46	Arterial
TERF2IP	4.93E-50	0.5162782173	0.471	0.389	2.79E-45	Arterial
GNAQ	8.97E-50	0.5349857528	0.441	0.35	5.08E-45	Arterial
CCNY	9.10E-49	0.8133873818	0.278	0.196	5.15E-44	Arterial
PLXNA2	3.93E-48	0.5228754509	0.35	0.257	2.22E-43	Arterial
SELT	4.72E-48	0.5219675218	0.297	0.209	2.68E-43	Arterial
PIK3C2A	4.92E-48	0.5422859839	0.435	0.346	2.78E-43	Arterial
PARVA	9.44E-48	0.6709353072	0.299	0.216	5.35E-43	Arterial
CNOT6L	1.66E-47	0.59287802	0.326	0.239	9.40E-43	Arterial
EIF2AK4	3.52E-47	0.6687624805	0.308	0.225	1.99E-42	Arterial
RFK	5.05E-47	0.6450484792	0.304	0.22	2.86E-42	Arterial
AAK1	6.31E-46	0.7392242915	0.272	0.192	3.57E-41	Arterial
DICER1	7.16E-46	0.644559092	0.281	0.2	4.05E-41	Arterial
FKBP9	1.15E-45	0.5543651354	0.433	0.347	6.49E-41	Arterial
FDFT1	3.43E-45	0.780882779	0.275	0.197	1.94E-40	Arterial
KLF3	6.16E-45	0.5728941211	0.395	0.309	3.49E-40	Arterial
TMEM14A	1.09E-44	0.6385568907	0.336	0.253	6.20E-40	Arterial
DOCK1	1.11E-44	0.6241862383	0.278	0.197	6.26E-40	Arterial
ABHD17A	2.04E-44	0.5381397912	0.353	0.268	1.15E-39	Arterial
ELOVL5	2.47E-44	0.5658535581	0.362	0.278	1.40E-39	Arterial
DAP	2.71E-44	0.614040938	0.347	0.265	1.54E-39	Arterial
TNKS1BP1	1.57E-43	0.7124724413	0.253	0.175	8.90E-39	Arterial
NAV1	1.59E-43	0.5370640679	0.258	0.178	9.00E-39	Arterial
MYO1E	3.62E-42	0.63572495	0.321	0.239	2.05E-37	Arterial
RRAGA	3.67E-42	0.5816792114	0.398	0.32	2.08E-37	Arterial
ATP6AP1	2.24E-41	0.5065723794	0.42	0.341	1.27E-36	Arterial
CNDP2	3.29E-41	0.5702690437	0.324	0.244	1.86E-36	Arterial
CSRNP1	4.67E-41	0.5650816168	0.441	0.363	2.65E-36	Arterial
RTFDC1	1.09E-40	0.5770587312	0.277	0.199	6.19E-36	Arterial
UFD1L	1.13E-40	0.6141065627	0.257	0.181	6.40E-36	Arterial
CHD3	3.16E-40	0.5827963413	0.26	0.184	1.79E-35	Arterial
MYO10	5.48E-40	0.665159764	0.299	0.223	3.11E-35	Arterial
CYFIP1	6.69E-40	0.5334762232	0.328	0.247	3.79E-35	Arterial
SMAD2	8.11E-39	0.5262659689	0.316	0.237	4.59E-34	Arterial
PPP1R15B	1.12E-38	0.6186428023	0.281	0.205	6.34E-34	Arterial
RNF5	1.32E-38	0.5383952647	0.329	0.251	7.48E-34	Arterial
CMPK1	4.73E-38	0.5218902937	0.393	0.316	2.68E-33	Arterial
COMT	5.90E-38	0.510486849	0.49	0.421	3.34E-33	Arterial
MAPK3	7.63E-38	0.5383416358	0.381	0.306	4.32E-33	Arterial
HAGH	1.02E-37	0.6153940259	0.269	0.195	5.77E-33	Arterial
SNX9	4.47E-37	0.5554400999	0.341	0.265	2.53E-32	Arterial
TCIRG1	4.57E-37	0.6236019382	0.266	0.193	2.59E-32	Arterial
C7orf50	8.87E-36	0.5965250647	0.289	0.218	5.02E-31	Arterial
TMEM106B	1.37E-35	0.5837410847	0.277	0.204	7.73E-31	Arterial
TEK	1.94E-35	0.5329649907	0.365	0.287	1.10E-30	Arterial
MIR4435-2HG	1.54E-34	0.6338968213	0.359	0.288	8.70E-30	Arterial
CD2BP2	2.25E-34	0.5629016509	0.3	0.228	1.27E-29	Arterial
TM9SF2	7.29E-34	0.5165011928	0.402	0.33	4.13E-29	Arterial
FAM127A	1.27E-33	0.5908210515	0.274	0.204	7.21E-29	Arterial
TCF7L2	1.32E-33	0.5302066596	0.258	0.188	7.49E-29	Arterial
GLRX	1.49E-33	0.5443828642	0.256	0.188	8.41E-29	Arterial
UBE2Q2	7.12E-33	0.6576231551	0.256	0.189	4.03E-28	Arterial
C6orf89	8.53E-33	0.5971581871	0.269	0.201	4.83E-28	Arterial
TMEM9B	2.57E-32	0.5108129983	0.322	0.251	1.46E-27	Arterial
PLK3	5.49E-32	0.5481678427	0.298	0.228	3.11E-27	Arterial
INSIG1	1.51E-31	0.5615026837	0.377	0.305	8.57E-27	Arterial
GAS2L1	4.16E-31	0.5160650178	0.265	0.197	2.36E-26	Arterial
FAM174A	1.16E-30	0.5822670837	0.265	0.2	6.58E-26	Arterial
HEXIM1	1.98E-30	0.5114602712	0.263	0.196	1.12E-25	Arterial
CD2AP	1.55E-29	0.5523567799	0.276	0.21	8.79E-25	Arterial
CD55	3.84E-28	0.680571131	0.449	0.396	2.17E-23	Arterial
GLUD1	4.27E-26	0.5574515788	0.345	0.285	2.42E-21	Arterial
INTS6	4.34E-25	0.5396239514	0.307	0.247	2.46E-20	Arterial
DBNL	1.02E-24	0.5061131679	0.295	0.235	5.77E-20	Arterial
TEAD4	1.24E-24	0.5007732205	0.253	0.195	7.02E-20	Arterial
MYLIP	1.36E-24	0.516550386	0.324	0.263	7.69E-20	Arterial
PARP9	1.93E-24	0.5296403704	0.252	0.193	1.09E-19	Arterial
TBRG1	8.18E-24	0.5152974616	0.313	0.254	4.63E-19	Arterial
FZD6	3.19E-23	0.5491398523	0.286	0.229	1.81E-18	Arterial
BCL7B	2.53E-22	0.5455495629	0.269	0.213	1.43E-17	Arterial
NGRN	5.18E-20	0.5052312173	0.27	0.219	2.93E-15	Arterial
RBP71	0	2.445146863	0.728	0.267	0	Capillary
BTNL91	0	2.470057149	0.526	0.086	0	Capillary
TMEM88	0	1.674145115	0.59	0.239	0	Capillary
CD36	0	2.979587515	0.433	0.125	0	Capillary
GSN	0	1.59778117	0.958	0.725	0	Capillary
ASS11	2.76E-291	1.755039061	0.477	0.184	1.56E-286	Capillary
TIMP31	4.35E-275	1.053218124	0.861	0.568	2.46E-270	Capillary
SCARB1	3.34E-269	1.991807148	0.392	0.136	1.89E-264	Capillary
AIF1L1	8.64E-269	1.725240396	0.312	0.088	4.89E-264	Capillary
PLVAP	2.47E-263	1.056171435	0.955	0.732	1.40E-258	Capillary
A2M1	2.74E-263	0.7394662109	0.961	0.802	1.55E-258	Capillary
TXNIP2	2.39E-262	1.140296093	0.849	0.548	1.35E-257	Capillary
ATOH8	7.66E-262	1.942541162	0.259	0.065	4.34E-257	Capillary
RGCC	5.73E-258	1.260143174	0.758	0.418	3.25E-253	Capillary
SGK1	1.91E-257	1.295893185	0.725	0.428	1.08E-252	Capillary
FLT11	5.75E-244	0.8557844583	0.804	0.486	3.26E-239	Capillary
FAM13C	1.83E-232	1.626251382	0.367	0.13	1.03E-227	Capillary
SRGN1	8.47E-232	0.8349028879	0.85	0.565	4.80E-227	Capillary
CD320	1.34E-223	2.113884455	0.661	0.424	7.56E-219	Capillary
ITM2A1	4.55E-212	0.947710446	0.761	0.475	2.58E-207	Capillary
TSC22D11	3.09E-211	0.9244930675	0.894	0.669	1.75E-206	Capillary
APOLD1	2.49E-206	1.204274478	0.659	0.379	1.41E-201	Capillary
FAM107A1	1.40E-205	1.365329888	0.449	0.194	7.92E-201	Capillary
MT1E	2.74E-204	2.285752258	0.258	0.077	1.55E-199	Capillary
JUNB	2.34E-198	0.7353382123	0.957	0.851	1.33E-193	Capillary
SPARCL11	2.29E-190	0.612026761	0.973	0.777	1.30E-185	Capillary
TSPAN131	3.03E-190	1.155917259	0.597	0.329	1.72E-185	Capillary
CX3CL11	8.27E-189	1.364442268	0.393	0.161	4.68E-184	Capillary
EPHX1	6.23E-184	1.242620565	0.527	0.275	3.53E-179	Capillary
SLC2A31	7.06E-182	0.9120980482	0.825	0.574	4.00E-177	Capillary
IGFBP21	2.78E-181	1.328705281	0.418	0.184	1.57E-176	Capillary
HLA-E	3.20E-180	0.5426507924	0.986	0.918	1.81E-175	Capillary
SLC9A3R21	8.95E-180	0.792960759	0.78	0.51	5.07E-175	Capillary
H3F3B	8.20E-179	0.5159849401	0.982	0.921	4.65E-174	Capillary
EMCN	3.87E-177	0.7418981564	0.834	0.584	2.19E-172	Capillary
PIK3R31	5.86E-175	1.018945269	0.587	0.318	3.32E-170	Capillary
MGLL	9.24E-175	1.322889226	0.63	0.398	5.23E-170	Capillary
SOCS31	6.28E-172	0.8530314433	0.872	0.669	3.55E-167	Capillary
CD741	1.50E-171	0.5041003109	0.982	0.802	8.51E-167	Capillary
IGFBP41	4.28E-170	0.7745514426	0.906	0.775	2.42E-165	Capillary
ZFP361	6.68E-170	0.8218370666	0.932	0.772	3.78E-165	Capillary
BST21	7.35E-168	0.8352107261	0.811	0.562	4.16E-163	Capillary
CYYR11	9.96E-168	0.8408909294	0.726	0.474	5.64E-163	Capillary
IER21	7.87E-166	0.7623290287	0.892	0.717	4.46E-161	Capillary
FOSB	1.28E-154	0.9275180875	0.813	0.604	7.22E-150	Capillary
SERTAD1	5.01E-154	0.8925142894	0.714	0.488	2.84E-149	Capillary
FCN3	1.11E-150	1.610580593	0.273	0.099	6.31E-146	Capillary
AQP11	1.32E-149	0.7213347739	0.85	0.625	7.50E-145	Capillary
CXCL121	2.43E-147	0.8574185561	0.443	0.211	1.38E-142	Capillary
NQO1	2.79E-147	1.372461933	0.432	0.219	1.58E-142	Capillary
PLPP11	7.15E-142	1.17150432	0.598	0.386	4.05E-137	Capillary
CDKN1A1	5.32E-141	0.9611401739	0.744	0.532	3.01E-136	Capillary
PDK41	7.28E-141	0.856752303	0.544	0.294	4.12E-136	Capillary
GADD45B1	2.20E-140	0.7155196075	0.804	0.596	1.25E-135	Capillary
FOS	3.86E-140	0.7433911676	0.928	0.822	2.18E-135	Capillary
ESAM1	6.29E-140	0.5892056786	0.842	0.617	3.56E-135	Capillary
HLA-DRB11	6.07E-139	0.5024755449	0.904	0.652	3.44E-134	Capillary
BCAM1	2.89E-134	0.692132029	0.787	0.574	1.63E-129	Capillary
KLF41	3.79E-133	0.7759694413	0.731	0.502	2.15E-128	Capillary
NES1	6.48E-133	1.081390621	0.427	0.218	3.67E-128	Capillary
NOTCH41	7.63E-133	0.5829141166	0.61	0.347	4.32E-128	Capillary
EPAS11	2.60E-132	0.6703639382	0.884	0.692	1.47E-127	Capillary
KDR	1.10E-130	0.7570904969	0.633	0.393	6.22E-126	Capillary
HLA-DMA1	4.02E-130	0.7549604455	0.617	0.362	2.28E-125	Capillary
TM4SF18	2.92E-129	0.7822836736	0.662	0.427	1.65E-124	Capillary
SDPR	1.33E-126	1.248168883	0.484	0.275	7.52E-122	Capillary
CD341	5.62E-126	0.623985119	0.8	0.6	3.18E-121	Capillary
THBD	1.54E-125	0.9097753776	0.66	0.444	8.72E-121	Capillary
HBEGF1	2.22E-125	1.044332992	0.495	0.281	1.26E-120	Capillary
LDB2	1.97E-123	0.6985450787	0.726	0.514	1.11E-118	Capillary
FXYD6	4.80E-122	1.011167741	0.267	0.105	2.72E-117	Capillary
JUN	5.20E-122	0.6120677327	0.924	0.798	2.94E-117	Capillary
VAMP5	7.15E-122	0.6355142821	0.875	0.705	4.05E-117	Capillary
TMEM471	2.02E-121	1.15318896	0.317	0.14	1.14E-116	Capillary
C11orf96	2.32E-120	1.573451375	0.351	0.17	1.32E-115	Capillary
GPX3	2.11E-119	1.529823063	0.278	0.118	1.20E-114	Capillary
EGR11	5.86E-119	0.9124154761	0.681	0.467	3.32E-114	Capillary
CLEC14A1	2.90E-117	0.6244540528	0.834	0.658	1.64E-112	Capillary
CDC42EP4	9.27E-117	1.188611378	0.32	0.147	5.25E-112	Capillary
MT1X	1.16E-113	1.413794794	0.374	0.19	6.56E-109	Capillary
EMP21	1.73E-113	0.6946252633	0.686	0.489	9.77E-109	Capillary
MCF2L	4.30E-113	0.8160441434	0.415	0.215	2.43E-108	Capillary
PLPP3	3.85E-112	1.043302319	0.566	0.372	2.18E-107	Capillary
OSBPL1A	3.65E-111	1.15809678	0.361	0.181	2.07E-106	Capillary
SOX171	5.22E-111	1.061081974	0.508	0.298	2.96E-106	Capillary
LPAR6	5.48E-111	0.7083814535	0.598	0.379	3.11E-106	Capillary
ITGA1	9.56E-111	0.9341006096	0.458	0.257	5.41E-106	Capillary
INHBB	1.57E-110	1.315663636	0.338	0.164	8.92E-106	Capillary
LIFR1	2.14E-110	0.8150399271	0.471	0.26	1.21E-105	Capillary
TSC22D3	4.55E-110	0.7209199361	0.714	0.494	2.57E-105	Capillary
NOSTRIN1	8.42E-109	0.8448751434	0.523	0.314	4.77E-104	Capillary
ZFP36L11	4.24E-108	0.5890851973	0.872	0.712	2.40E-103	Capillary
C10orf541	2.24E-106	1.251680423	0.335	0.167	1.27E-101	Capillary
IFITM12	1.72E-105	0.628037418	0.728	0.508	9.73E-101	Capillary
SEC14L1	1.17E-104	0.7513182856	0.67	0.473	6.60E-100	Capillary
RDX1	1.41E-104	0.7701308456	0.72	0.549	7.96E-100	Capillary
TGFBR2	8.92E-104	0.6707803719	0.815	0.65	5.05E-99	Capillary
ZBTB16	1.42E-103	1.051030379	0.278	0.121	8.06E-99	Capillary
TACC11	8.21E-103	0.7710244953	0.692	0.508	4.65E-98	Capillary
TPM11	4.82E-102	0.8349040418	0.505	0.309	2.73E-97	Capillary
MIDN1	8.19E-99	0.7106834902	0.676	0.478	4.64E-94	Capillary
PDGFD	9.11E-99	1.064874558	0.254	0.109	5.16E-94	Capillary
NRP1	6.23E-97	0.5704794721	0.694	0.476	3.53E-92	Capillary
CFAP20	1.63E-96	1.286801202	0.423	0.255	9.24E-92	Capillary
CAV11	4.37E-96	0.5346639311	0.876	0.74	2.48E-91	Capillary
GPRC5B1	4.68E-95	0.9580883195	0.358	0.188	2.65E-90	Capillary
SEPP1	4.30E-93	1.037907581	0.361	0.195	2.43E-88	Capillary
TMEM204	7.40E-93	0.7329072644	0.583	0.391	4.19E-88	Capillary
ADGRF51	6.38E-92	0.5399968748	0.59	0.382	3.61E-87	Capillary
HLA-DRB51	1.69E-90	0.5219230556	0.649	0.419	9.56E-86	Capillary
CTSH	5.39E-90	0.7322191806	0.601	0.415	3.05E-85	Capillary
NR4A11	8.25E-89	0.7083009549	0.665	0.475	4.67E-84	Capillary
GAS61	4.79E-88	0.7165524547	0.491	0.303	2.71E-83	Capillary
PLCB11	8.25E-88	0.7318160392	0.448	0.266	4.67E-83	Capillary
DDIT41	1.78E-87	0.672709888	0.626	0.434	1.01E-82	Capillary
GIMAP5	3.62E-87	0.8715004889	0.313	0.155	2.05E-82	Capillary
CAT	2.27E-86	1.271030285	0.295	0.149	1.28E-81	Capillary
CSRNP11	5.91E-86	0.7074808213	0.55	0.362	3.35E-81	Capillary
IRF11	2.76E-85	0.6183738232	0.669	0.477	1.56E-80	Capillary
SLCO2A11	5.48E-85	0.7113303944	0.629	0.44	3.11E-80	Capillary
GPR146	1.11E-84	0.9417305476	0.351	0.188	6.30E-80	Capillary
EFNB1	2.40E-84	1.020967739	0.276	0.134	1.36E-79	Capillary
SPRY1	2.94E-83	0.5881170847	0.814	0.643	1.66E-78	Capillary
CDC42EP11	1.03E-82	0.7785083624	0.421	0.248	5.84E-78	Capillary
PRMT1	1.81E-82	0.6239667091	0.638	0.475	1.03E-77	Capillary
SNAI1	2.95E-82	0.9308533524	0.396	0.23	1.67E-77	Capillary
ID2	3.73E-82	0.7624101432	0.554	0.37	2.11E-77	Capillary
BTG21	1.30E-81	0.5845950782	0.593	0.395	7.37E-77	Capillary
LMCD12	6.25E-81	0.5985543353	0.653	0.464	3.54E-76	Capillary
FAM110D	8.65E-81	0.9757906185	0.327	0.174	4.90E-76	Capillary
PITPNC1	3.57E-80	0.835215603	0.409	0.241	2.02E-75	Capillary
RILPL21	3.52E-79	0.7315784555	0.464	0.289	1.99E-74	Capillary
DLC1	4.39E-79	0.7098426963	0.592	0.419	2.49E-74	Capillary
CASKIN21	1.98E-78	0.7841409226	0.353	0.195	1.12E-73	Capillary
MLEC	3.07E-77	0.6249776339	0.524	0.341	1.74E-72	Capillary
TMCC3	3.09E-77	0.9189231391	0.322	0.171	1.75E-72	Capillary
NFIB	6.18E-77	0.529404347	0.744	0.586	3.50E-72	Capillary
ENPP21	1.59E-76	1.098764513	0.375	0.218	8.98E-72	Capillary
FAM167B	1.66E-76	0.6586836697	0.581	0.389	9.40E-72	Capillary
CYB5A	2.52E-76	0.6666797374	0.579	0.412	1.43E-71	Capillary
HEXIM11	3.29E-76	0.8528187848	0.349	0.196	1.86E-71	Capillary
DHRS31	5.84E-76	0.8736689078	0.254	0.121	3.31E-71	Capillary
JAM22	3.75E-75	0.5698155963	0.612	0.421	2.12E-70	Capillary
ABCB11	4.72E-75	0.9986502503	0.285	0.146	2.67E-70	Capillary
RAPGEF31	6.77E-75	0.5550482111	0.41	0.24	3.84E-70	Capillary
SYNE21	6.90E-75	0.5259552808	0.613	0.424	3.91E-70	Capillary
DNAJB1	3.27E-74	0.6078894009	0.701	0.526	1.85E-69	Capillary
ANKRD29	1.01E-73	0.9796558037	0.284	0.146	5.70E-69	Capillary
PREX11	2.28E-73	0.7744748825	0.283	0.144	1.29E-68	Capillary
EHD4	1.73E-70	0.6026050934	0.627	0.473	9.80E-66	Capillary
TMEM150C	7.40E-69	0.9081172776	0.267	0.138	4.19E-64	Capillary
PPP1R10	4.95E-68	0.693421843	0.467	0.304	2.80E-63	Capillary
RAPGEF2	4.05E-66	0.8802644337	0.304	0.168	2.29E-61	Capillary
HERPUD11	1.26E-65	0.5633474579	0.631	0.471	7.16E-61	Capillary
ETS1	3.85E-64	0.5168031288	0.651	0.491	2.18E-59	Capillary
SORBS2	4.94E-64	0.5746101833	0.36	0.21	2.80E-59	Capillary
NEURL1B	5.63E-64	0.7935430869	0.286	0.153	3.19E-59	Capillary
EDNRB	1.01E-63	0.9272510892	0.34	0.204	5.74E-59	Capillary
LAP31	3.14E-63	0.5113223468	0.612	0.452	1.78E-58	Capillary
EFNB21	2.27E-62	0.5329197652	0.497	0.323	1.29E-57	Capillary
PLA2G16	6.92E-62	0.675534248	0.434	0.283	3.92E-57	Capillary
GIMAP6	2.34E-61	0.582367167	0.466	0.313	1.32E-56	Capillary
TNFRSF10D1	5.72E-60	0.6721183119	0.434	0.285	3.24E-55	Capillary
FABP41	1.04E-58	2.439225178	0.35	0.222	5.91E-54	Capillary
ENAH	1.27E-58	0.7122044574	0.275	0.15	7.18E-54	Capillary
TMEM243	1.39E-58	0.7473542461	0.309	0.179	7.85E-54	Capillary
KLF91	1.40E-58	0.5422856195	0.526	0.368	7.93E-54	Capillary
CLEC3B1	2.67E-58	0.7158118742	0.341	0.201	1.51E-53	Capillary
EPS82	5.99E-58	0.5960057457	0.367	0.222	3.39E-53	Capillary
DLL1	7.07E-58	0.7310157302	0.258	0.138	4.00E-53	Capillary
MSX11	1.54E-57	0.895521815	0.278	0.155	8.73E-53	Capillary
CTNNAL11	2.91E-57	0.7942795971	0.416	0.273	1.65E-52	Capillary
HSPA1A	3.24E-57	0.5485378781	0.791	0.646	1.83E-52	Capillary
SOCS21	2.05E-56	0.5667875432	0.455	0.303	1.16E-51	Capillary
IFNGR11	4.19E-56	0.6383412888	0.49	0.344	2.37E-51	Capillary
GFOD11	4.01E-55	0.6348572508	0.346	0.209	2.27E-50	Capillary
CDKN1C	7.30E-55	0.7215544955	0.283	0.158	4.13E-50	Capillary
ADGRG1	8.82E-55	0.6158643075	0.415	0.271	5.00E-50	Capillary
PALMD1	9.23E-54	0.5103167611	0.648	0.498	5.22E-49	Capillary
HSPA1B1	5.66E-53	0.5467778534	0.673	0.517	3.21E-48	Capillary
ARHGAP18	1.99E-52	0.6303308641	0.343	0.211	1.13E-47	Capillary
MT-ND4L1	4.49E-52	0.5215844834	0.79	0.689	2.54E-47	Capillary
HPCAL11	8.47E-52	0.6583053806	0.437	0.301	4.80E-47	Capillary
OLFML2A	1.57E-50	0.5719422701	0.331	0.2	8.88E-46	Capillary
TINAGL11	2.34E-50	0.5166234501	0.555	0.409	1.32E-45	Capillary
MGAT4A	8.39E-50	0.6743742497	0.365	0.233	4.75E-45	Capillary
CYSTM11	8.51E-50	0.5326560828	0.496	0.358	4.82E-45	Capillary
RND11	1.08E-49	0.8334532568	0.424	0.287	6.11E-45	Capillary
ACE1	1.83E-49	0.5778282313	0.297	0.173	1.04E-44	Capillary
H2AFX	1.40E-48	0.7187738067	0.361	0.235	7.91E-44	Capillary
ZC3HAV1	2.61E-48	0.6799547558	0.425	0.291	1.48E-43	Capillary
EXOC3L2	1.00E-47	0.740981876	0.263	0.152	5.68E-43	Capillary
FHL1	1.09E-47	0.8543354877	0.261	0.15	6.17E-43	Capillary
MT2A	1.33E-47	0.8853140145	0.708	0.596	7.53E-43	Capillary
OSTF1	4.49E-47	0.6043720913	0.452	0.32	2.54E-42	Capillary
PML	6.81E-47	0.5751548442	0.403	0.274	3.86E-42	Capillary
TOB1	4.93E-46	0.6595867914	0.263	0.153	2.79E-41	Capillary
TMTC1	1.79E-45	0.592746073	0.299	0.179	1.01E-40	Capillary
SOS11	3.09E-45	0.6136643897	0.301	0.183	1.75E-40	Capillary
SOX7	2.88E-43	0.6774598117	0.391	0.266	1.63E-38	Capillary
ADIPOR21	6.46E-42	0.8239075853	0.257	0.154	3.66E-37	Capillary
OFD1	8.10E-41	0.6737786375	0.254	0.152	4.59E-36	Capillary
MYLK1	9.76E-41	0.6516304038	0.323	0.209	5.53E-36	Capillary
MT-ATP8	3.70E-40	0.525054477	0.587	0.465	2.10E-35	Capillary
IDI1	5.37E-40	0.6696937541	0.326	0.215	3.04E-35	Capillary
MYLIP1	8.93E-40	0.5587515454	0.383	0.263	5.05E-35	Capillary
MTRNR2L121	1.81E-39	0.5277857525	0.37	0.246	1.03E-34	Capillary
SERTAD3	8.75E-39	0.6850306843	0.296	0.189	4.96E-34	Capillary
ABI3	1.00E-38	0.5807414269	0.382	0.267	5.69E-34	Capillary
CALCOCO2	1.64E-38	0.5256763684	0.413	0.292	9.27E-34	Capillary
PPM1D	3.92E-38	0.6628032234	0.273	0.17	2.22E-33	Capillary
VAT1	1.73E-37	0.516764356	0.488	0.372	9.81E-33	Capillary
CCND3	4.79E-37	0.5386273051	0.384	0.27	2.71E-32	Capillary
BTN3A2	4.20E-36	0.565146781	0.328	0.219	2.38E-31	Capillary
GLTSCR21	7.73E-36	0.5184533424	0.459	0.346	4.37E-31	Capillary
ASAH1	1.50E-35	0.5197646986	0.386	0.274	8.50E-31	Capillary
SORBS3	1.79E-35	0.5264589621	0.375	0.265	1.01E-30	Capillary
APOL31	3.75E-35	0.5261228588	0.324	0.214	2.12E-30	Capillary
CNOT6L1	3.97E-35	0.5029825952	0.354	0.242	2.25E-30	Capillary
C8orf4	4.41E-35	0.7157136861	0.341	0.236	2.50E-30	Capillary
RAPGEF4	1.13E-34	0.5829456803	0.291	0.19	6.42E-30	Capillary
NGRN1	3.00E-34	0.5758157505	0.325	0.219	1.70E-29	Capillary
NMRK1	1.24E-33	0.5859639968	0.251	0.157	7.02E-29	Capillary
CPD	2.89E-33	0.5128372998	0.384	0.273	1.63E-28	Capillary
IFI27L21	3.90E-33	0.5937420866	0.278	0.181	2.21E-28	Capillary
ARHGEF3	5.46E-33	0.6046076686	0.31	0.208	3.09E-28	Capillary
BCL31	1.68E-32	0.5018163026	0.38	0.269	9.50E-28	Capillary
CDKN1B	2.08E-32	0.5746106023	0.273	0.177	1.18E-27	Capillary
PLIN2	4.75E-32	0.5588004581	0.377	0.272	2.69E-27	Capillary
CDA	1.21E-31	0.691480742	0.278	0.183	6.83E-27	Capillary
KLF11	2.66E-31	0.6256561292	0.269	0.175	1.51E-26	Capillary
PELO	2.89E-30	0.6946350508	0.253	0.165	1.64E-25	Capillary
LHFP	3.41E-26	0.6549664328	0.273	0.189	1.93E-21	Capillary
GTF2B	3.59E-26	0.6793388849	0.265	0.181	2.03E-21	Capillary
SLC25A251	5.91E-26	0.5149067759	0.313	0.22	3.35E-21	Capillary
LRRC32	1.11E-24	0.5995336583	0.348	0.258	6.30E-20	Capillary
FABP5	1.58E-24	1.209347281	0.598	0.55	8.94E-20	Capillary
PLAT	1.84E-24	0.7978167429	0.271	0.19	1.04E-19	Capillary
PCDH11	2.61E-22	0.5024154544	0.256	0.176	1.48E-17	Capillary
SEPHS2	1.14E-20	0.5133238092	0.285	0.208	6.44E-16	Capillary
RGCC1	0	1.761964308	0.822	0.352	0	Tip-like
INSR1	0	1.857776031	0.81	0.363	0	Tip-like
MCAM	0	1.844118267	0.741	0.345	0	Tip-like
ESM1	0	2.559249595	0.451	0.071	0	Tip-like
NOTCH42	0	1.307193149	0.665	0.295	0	Tip-like
IVNS1ABP	0	1.827641319	0.681	0.324	0	Tip-like
KDR1	0	1.639323029	0.698	0.342	0	Tip-like
VWA1	0	1.500047411	0.803	0.457	0	Tip-like
CA2	0	2.652253702	0.435	0.089	0	Tip-like
SPRY4	0	2.092921535	0.499	0.155	0	Tip-like
LBH	0	2.083877189	0.554	0.212	0	Tip-like
COL4A1	0	2.134914175	0.953	0.615	0	Tip-like
CDH13	0	1.599707118	0.567	0.23	0	Tip-like
FLT12	0	1.742927226	0.778	0.443	0	Tip-like
LAMA4	0	1.396834627	0.746	0.417	0	Tip-like
MYO1B	0	1.832518094	0.524	0.202	0	Tip-like
MLEC1	0	1.528360979	0.612	0.294	0	Tip-like
IGFBP31	0	1.447830343	0.52	0.206	0	Tip-like
TP53I11	0	2.353156135	0.457	0.145	0	Tip-like
COL4A2	0	1.892572415	0.931	0.625	0	Tip-like
ANGPTL2	0	1.960855166	0.476	0.172	0	Tip-like
HECW2	0	1.67234988	0.485	0.181	0	Tip-like
PODXL1	0	1.206830572	0.738	0.435	0	Tip-like
PXDN	0	1.594656364	0.608	0.312	0	Tip-like
GRB10	0	1.422199361	0.547	0.255	0	Tip-like
TM4SF181	0	1.130700574	0.679	0.388	0	Tip-like
JUP	0	1.249106255	0.541	0.255	0	Tip-like
COL15A1	0	1.162466539	0.801	0.518	0	Tip-like
C1orf54	0	1.113093117	0.612	0.331	0	Tip-like
RGS31	0	1.412904965	0.581	0.302	0	Tip-like
NRP11	0	1.061331115	0.716	0.438	0	Tip-like
DYSF	0	1.274805123	0.531	0.256	0	Tip-like
ADGRF52	0	1.136702216	0.616	0.344	0	Tip-like
TMEM2041	0	1.167450753	0.624	0.353	0	Tip-like
PMEPA1	0	1.764569508	0.45	0.181	0	Tip-like
PDGFB1	0	1.37328709	0.458	0.19	0	Tip-like
PCDH17	0	1.173816106	0.672	0.405	0	Tip-like
PLVAP1	0	1.174006649	0.959	0.696	0	Tip-like
CCND1	0	1.135924456	0.531	0.269	0	Tip-like
NID1	0	1.350728877	0.534	0.274	0	Tip-like
THY1	0	1.918507336	0.406	0.146	0	Tip-like
MMP21	0	0.945163455	0.579	0.323	0	Tip-like
HTRA1	0	1.10849819	0.715	0.461	0	Tip-like
PLXNA21	0	1.399851924	0.473	0.222	0	Tip-like
MAP1B1	0	1.005433037	0.536	0.287	0	Tip-like
SERPINE1	0	1.084803872	0.579	0.33	0	Tip-like
PLAU	0	1.983114026	0.34	0.092	0	Tip-like
CD276	0	1.770164194	0.371	0.123	0	Tip-like
LAMB1	0	1.211104432	0.607	0.359	0	Tip-like
GPR4	0	1.471250187	0.422	0.176	0	Tip-like
MIR4435-2HG1	0	1.259289418	0.495	0.252	0	Tip-like
PTPRG	0	1.326336843	0.478	0.235	0	Tip-like
FAM198B	0	0.9475001875	0.571	0.328	0	Tip-like
FSCN1	0	1.132836291	0.672	0.43	0	Tip-like
ARHGDIB	0	0.9656435573	0.738	0.498	0	Tip-like
APLN	0	3.481930938	0.282	0.043	0	Tip-like
SEC14L11	0	0.9688868448	0.679	0.441	0	Tip-like
ITGA11	0	1.410574679	0.463	0.225	0	Tip-like
FAM167B1	0	0.7961366725	0.595	0.357	0	Tip-like
SLC9A3R22	0	0.5328106806	0.719	0.481	0	Tip-like
DLL41	0	1.274138163	0.443	0.206	0	Tip-like
BGN1	0	1.140013607	0.461	0.225	0	Tip-like
COLGALT1	0	1.402546902	0.408	0.172	0	Tip-like
APLNR	0	1.019629979	0.525	0.29	0	Tip-like
COL6A2	0	0.8962925539	0.547	0.313	0	Tip-like
SEMA3F	0	1.283201303	0.427	0.193	0	Tip-like
EDIL3	0	2.129027552	0.313	0.08	0	Tip-like
ETS11	0	0.8929614113	0.691	0.458	0	Tip-like
ARHGAP181	0	1.761212743	0.409	0.177	0	Tip-like
LOXL2	0	1.693884663	0.384	0.153	0	Tip-like
DOCK6	0	1.055796726	0.486	0.255	0	Tip-like
PCDH12	0	1.492911427	0.389	0.159	0	Tip-like
ROBO4	0	0.9753677395	0.633	0.405	0	Tip-like
ANGPT2	0	0.8622124865	0.53	0.303	0	Tip-like
TNFAIP8L1	0	1.347771281	0.42	0.194	0	Tip-like
ESAM2	0	0.8545031703	0.813	0.588	0	Tip-like
F2RL3	0	1.178334452	0.407	0.182	0	Tip-like
CD931	0	0.8360817504	0.831	0.608	0	Tip-like
RASGRP3	0	0.9584326657	0.495	0.272	0	Tip-like
PRDM1	0	1.282546713	0.389	0.169	0	Tip-like
TSPAN15	0	1.233249611	0.427	0.207	0	Tip-like
PTP4A31	0	1.301215071	0.408	0.189	0	Tip-like
MMP14	0	1.186076628	0.446	0.228	0	Tip-like
FSTL1	0	1.074333589	0.682	0.465	0	Tip-like
ITIH5	0	1.510028511	0.363	0.147	0	Tip-like
LAMC1	0	1.07257847	0.605	0.39	0	Tip-like
PLOD11	0	1.224559427	0.415	0.201	0	Tip-like
MYO101	0	1.232548832	0.407	0.194	0	Tip-like
F2R	0	1.133282002	0.499	0.289	0	Tip-like
PHLDB11	0	1.286365844	0.353	0.144	0	Tip-like
COL18A1	0	0.96175915	0.718	0.509	0	Tip-like
NDST1	0	1.160379258	0.419	0.212	0	Tip-like
PLXND1	0	0.8930493719	0.666	0.46	0	Tip-like
RAB31	0	1.286624407	0.381	0.175	0	Tip-like
PGF	0	2.258762249	0.355	0.15	0	Tip-like
NID2	0	2.790242115	0.25	0.046	0	Tip-like
AFAP1L1	0	1.122712939	0.436	0.233	0	Tip-like
CDC42EP12	0	1.032940289	0.424	0.221	0	Tip-like
ADAMTSL2	0	2.258901594	0.263	0.061	0	Tip-like
LINC001521	0	1.541753141	0.337	0.137	0	Tip-like
STC2	0	1.619660071	0.323	0.126	0	Tip-like
SPARC	0	1.602928094	0.989	0.794	0	Tip-like
EXOC3L21	0	1.451118384	0.317	0.123	0	Tip-like
LXN	0	1.306458152	0.395	0.201	0	Tip-like
SERPINH1	0	1.032174343	0.783	0.59	0	Tip-like
COL13A1	0	2.478705579	0.254	0.061	0	Tip-like
DGKD	0	2.05736859	0.261	0.068	0	Tip-like
EHD41	0	0.7570345842	0.64	0.447	0	Tip-like
VASP	0	0.9282537396	0.497	0.304	0	Tip-like
CLIC41	0	0.7879671536	0.626	0.434	0	Tip-like
MYO6	0	1.112131892	0.421	0.229	0	Tip-like
LDHB	0	0.8985340217	0.604	0.415	0	Tip-like
PDGFD1	0	2.018070543	0.271	0.083	0	Tip-like
PLPP31	0	1.416759506	0.535	0.348	0	Tip-like
ACE2	0	1.130289363	0.333	0.146	0	Tip-like
FHOD1	0	1.482013435	0.296	0.109	0	Tip-like
TNFRSF41	0	1.548241633	0.374	0.188	0	Tip-like
FCN31	0	1.490111607	0.26	0.075	0	Tip-like
FAM101B	0	2.100636657	0.254	0.07	0	Tip-like
LGALS1	0	0.8277037012	0.813	0.631	0	Tip-like
DGKH	0	1.173671485	0.355	0.175	0	Tip-like
PREX12	0	1.278683017	0.299	0.119	0	Tip-like
APLP2	0	0.8191522772	0.791	0.614	0	Tip-like
KIAA11471	0	1.382844961	0.289	0.113	0	Tip-like
APCDD1	0	1.751972969	0.278	0.103	0	Tip-like
CD342	0	0.671738936	0.754	0.579	0	Tip-like
EXOC3L1	0	1.288218276	0.288	0.113	0	Tip-like
ITGB1	0	0.9407395394	0.896	0.723	0	Tip-like
HSPG2	0	1.163185143	0.949	0.777	0	Tip-like
BDKRB2	0	1.690058017	0.28	0.109	0	Tip-like
ITGA5	0	0.777006325	0.674	0.504	0	Tip-like
EFNB11	0	1.284207844	0.278	0.111	0	Tip-like
VWF1	0	0.5817196591	0.903	0.736	0	Tip-like
CALCRL	0	0.6829469108	0.809	0.645	0	Tip-like
MTSS1	0	1.303778607	0.279	0.117	0	Tip-like
VASH11	0	1.318367375	0.286	0.126	0	Tip-like
DDI2	0	1.425171063	0.262	0.103	0	Tip-like
JAM3	0	1.287526082	0.277	0.118	0	Tip-like
MSN	0	0.7472771911	0.803	0.644	0	Tip-like
GSN1	0	0.6335374301	0.862	0.709	0	Tip-like
PRSS23	0	0.7770640279	0.781	0.632	0	Tip-like
CCDC85B	0	0.7635350288	0.852	0.708	0	Tip-like
A2M2	0	0.6469576903	0.919	0.786	0	Tip-like
APP	0	0.6227607158	0.898	0.785	0	Tip-like
CALM11	0	1.076919258	0.921	0.81	0	Tip-like
ENG	0	0.6143432358	0.897	0.796	0	Tip-like
PFN1	0	0.5613103186	0.899	0.831	0	Tip-like
ACTB	0	0.6404430922	0.981	0.953	0	Tip-like
FMNL3	1.55E-306	1.113799606	0.352	0.175	8.78E-302	Tip-like
EFNA11	3.11E-306	0.8316793368	0.615	0.424	1.76E-301	Tip-like
CSTB	6.68E-306	0.6382324815	0.759	0.629	3.78E-301	Tip-like
THBS1	1.19E-305	0.9400129736	0.498	0.3	6.74E-301	Tip-like
ST8SIA4	2.49E-304	1.231700022	0.319	0.149	1.41E-299	Tip-like
YWHAH	2.36E-303	0.7115629852	0.716	0.548	1.34E-298	Tip-like
TCF4	3.76E-302	0.5063006728	0.901	0.788	2.13E-297	Tip-like
ADGRL2	1.15E-297	1.073037745	0.357	0.179	6.49E-293	Tip-like
RALA	1.29E-297	0.9310555889	0.505	0.319	7.32E-293	Tip-like
CLIC1	1.85E-295	0.5137894157	0.833	0.741	1.05E-290	Tip-like
UBE2J11	3.02E-289	0.9178857162	0.548	0.369	1.71E-284	Tip-like
PLCB12	5.67E-286	0.981645643	0.428	0.242	3.21E-281	Tip-like
PINK1	1.33E-279	1.132120821	0.368	0.197	7.53E-275	Tip-like
MMP15	5.18E-278	1.238761522	0.25	0.106	2.94E-273	Tip-like
AGRN	6.60E-277	1.077120054	0.381	0.207	3.74E-272	Tip-like
UACA1	8.85E-277	0.810343448	0.554	0.365	5.01E-272	Tip-like
BCL6B	3.92E-274	0.9751215069	0.398	0.221	2.22E-269	Tip-like
EIF4EBP1	3.08E-272	0.9554408399	0.395	0.219	1.74E-267	Tip-like
JAK1	3.45E-268	0.652581514	0.692	0.547	1.95E-263	Tip-like
CTNNB1	2.88E-267	0.6976909586	0.689	0.513	1.63E-262	Tip-like
MCF2L1	1.18E-265	0.9318150665	0.367	0.195	6.69E-261	Tip-like
ARHGEF7	3.13E-265	1.057766588	0.369	0.2	1.77E-260	Tip-like
UNC5B1	8.34E-263	1.259734193	0.271	0.124	4.72E-258	Tip-like
NRP2	1.58E-262	0.6753160987	0.557	0.358	8.97E-258	Tip-like
SYNPO1	1.38E-261	0.7488248359	0.524	0.337	7.83E-257	Tip-like
MYADM	1.80E-260	0.7695969715	0.559	0.38	1.02E-255	Tip-like
MAPRE2	2.15E-260	1.041559474	0.348	0.184	1.22E-255	Tip-like
FNDC3B	5.38E-256	0.8586656967	0.5	0.322	3.05E-251	Tip-like
MAP4K4	1.86E-251	0.8666368925	0.484	0.308	1.06E-246	Tip-like
KIAA1462	4.54E-251	1.264083431	0.282	0.137	2.57E-246	Tip-like
UPP11	4.68E-250	0.5565593189	0.605	0.409	2.65E-245	Tip-like
FAM129B	3.53E-248	0.8570198951	0.383	0.212	2.00E-243	Tip-like
NES2	4.09E-246	1.017402737	0.364	0.199	2.31E-241	Tip-like
CD81	2.93E-245	0.5130445542	0.782	0.63	1.66E-240	Tip-like
PLEKHA1	1.33E-244	0.8230364032	0.476	0.299	7.53E-240	Tip-like
RASAL2	7.18E-243	0.9104699342	0.412	0.243	4.07E-238	Tip-like
NREP	3.12E-241	0.9350351675	0.424	0.255	1.77E-236	Tip-like
TMEM184B1	9.15E-240	0.9260523489	0.399	0.233	5.18E-235	Tip-like
ACVRL1	7.26E-237	0.6955715559	0.572	0.402	4.11E-232	Tip-like
SLC12A2	1.41E-236	1.044904323	0.296	0.148	7.99E-232	Tip-like
ACOT7	5.14E-234	0.9796124725	0.295	0.147	2.91E-229	Tip-like
PTPRK	2.70E-230	0.7807292587	0.472	0.301	1.53E-225	Tip-like
CREB3L2	3.08E-228	1.01773395	0.321	0.171	1.74E-223	Tip-like
MRPL171	2.13E-225	0.7714453276	0.467	0.301	1.20E-220	Tip-like
2-9월	4.85E-225	0.6093495874	0.615	0.445	2.74E-220	Tip-like
SEMA6B	6.42E-223	0.8899559266	0.354	0.198	3.63E-218	Tip-like
AES1	7.76E-222	0.5846290865	0.553	0.372	4.39E-217	Tip-like
NAV11	2.53E-219	1.015324116	0.306	0.161	1.43E-214	Tip-like
PGM2L1	6.51E-219	0.9602947074	0.399	0.241	3.69E-214	Tip-like
RAPGEF41	1.30E-218	1.018924782	0.315	0.169	7.36E-214	Tip-like
MAGED2	2.07E-217	0.7795191848	0.524	0.368	1.17E-212	Tip-like
DOCK4	9.96E-217	0.9553891201	0.376	0.219	5.64E-212	Tip-like
CDH51	6.05E-216	0.5360872894	0.721	0.576	3.43E-211	Tip-like
GMFG	1.29E-214	0.5419963726	0.653	0.479	7.29E-210	Tip-like
RAPGEF11	5.61E-213	0.9461425086	0.32	0.173	3.18E-208	Tip-like
IL321	1.67E-212	0.8219565477	0.599	0.435	9.43E-208	Tip-like
ARHGEF12	2.00E-212	0.7243251711	0.52	0.353	1.13E-207	Tip-like
PLK2	1.90E-211	0.8119491741	0.526	0.358	1.08E-206	Tip-like
KCNN31	3.72E-209	1.082059529	0.261	0.129	2.11E-204	Tip-like
JAG21	9.40E-208	0.7184450013	0.391	0.227	5.32E-203	Tip-like
MAP1S	3.02E-204	0.9878333139	0.274	0.14	1.71E-199	Tip-like
FYN	4.97E-204	0.8175595567	0.428	0.268	2.81E-199	Tip-like
CHD31	1.47E-203	0.8383733631	0.311	0.167	8.30E-199	Tip-like
DPYSL3	1.92E-202	0.7341649001	0.459	0.299	1.09E-197	Tip-like
AKAP13	4.32E-202	0.6146577652	0.621	0.459	2.45E-197	Tip-like
ABRACL1	2.90E-201	0.7557092227	0.394	0.237	1.64E-196	Tip-like
PKIG1	6.68E-201	0.6395636418	0.551	0.395	3.78E-196	Tip-like
RNF19A	7.89E-198	0.8458817661	0.407	0.253	4.47E-193	Tip-like
ACTN41	1.14E-197	0.5112519252	0.712	0.576	6.45E-193	Tip-like
IDH2	1.91E-197	0.8403895171	0.326	0.181	1.08E-192	Tip-like
PDE8A	6.17E-197	0.9286299063	0.278	0.145	3.49E-192	Tip-like
NGFRAP11	4.17E-196	0.8699272468	0.42	0.275	2.36E-191	Tip-like
GPX1	6.72E-196	0.8834249752	0.471	0.316	3.80E-191	Tip-like
EOGT1	2.01E-195	0.9665222978	0.284	0.15	1.14E-190	Tip-like
CDA1	4.96E-189	0.9377935562	0.299	0.164	2.81E-184	Tip-like
RRBP1	1.43E-186	0.5870194611	0.619	0.468	8.11E-182	Tip-like
FLNA	1.09E-185	0.5531126733	0.623	0.479	6.18E-181	Tip-like
MARCKSL1	1.55E-185	0.5056521289	0.751	0.629	8.80E-181	Tip-like
SH2B3	7.51E-184	0.7813887012	0.36	0.216	4.25E-179	Tip-like
MACF1	8.82E-184	0.5649481962	0.657	0.514	4.99E-179	Tip-like
PRKCDBP1	1.81E-183	0.7487353456	0.444	0.302	1.02E-178	Tip-like
ORAI2	3.24E-183	0.918207273	0.283	0.152	1.83E-178	Tip-like
ITGA6	9.65E-183	0.564329361	0.687	0.534	5.46E-178	Tip-like
ADGRG11	7.87E-182	0.7460875083	0.4	0.252	4.46E-177	Tip-like
ITGA2	2.65E-180	1.064828112	0.281	0.154	1.50E-175	Tip-like
STT3B	7.09E-180	0.8256596335	0.342	0.202	4.01E-175	Tip-like
ZEB1	4.42E-179	0.7137195988	0.492	0.339	2.50E-174	Tip-like
MPZL2	1.49E-178	0.6361338121	0.398	0.245	8.45E-174	Tip-like
ANKRD11	1.27E-177	0.6518926284	0.477	0.324	7.21E-173	Tip-like
KLHL5	2.34E-177	0.9141138405	0.325	0.19	1.33E-172	Tip-like
PICALM	1.70E-176	0.6209839909	0.528	0.374	9.64E-172	Tip-like
DAPK3	4.32E-176	0.6930246103	0.391	0.245	2.45E-171	Tip-like
ZYX	5.94E-175	0.7454028573	0.504	0.366	3.36E-170	Tip-like
CDK2AP1	1.49E-174	0.7503015641	0.303	0.17	8.44E-170	Tip-like
FZD4	4.18E-173	0.7516513936	0.44	0.29	2.37E-168	Tip-like
CALU	3.11E-172	0.6050967889	0.549	0.402	1.76E-167	Tip-like
WDR1	6.60E-171	0.6153660206	0.55	0.412	3.74E-166	Tip-like
RNF7	1.64E-170	0.5762691579	0.597	0.475	9.28E-166	Tip-like
SVIL	2.79E-169	0.6354374957	0.451	0.297	1.58E-164	Tip-like
HERC1	1.13E-168	0.7927844572	0.345	0.208	6.38E-164	Tip-like
TAX1BP3	3.42E-168	0.5767764057	0.508	0.355	1.93E-163	Tip-like
CBLB	6.54E-167	0.8808048709	0.343	0.208	3.70E-162	Tip-like
NME4	8.78E-167	0.6814903166	0.412	0.268	4.97E-162	Tip-like
EDNRB1	3.64E-165	1.446789816	0.308	0.19	2.06E-160	Tip-like
RNF145	1.38E-164	0.6362604396	0.501	0.355	7.83E-160	Tip-like
SLC4A7	1.78E-164	0.9456153473	0.287	0.162	1.01E-159	Tip-like
SGK11	2.23E-164	0.5917676728	0.569	0.415	1.26E-159	Tip-like
CLSTN1	9.13E-162	0.8074054553	0.342	0.208	5.17E-157	Tip-like
IGFBP5	2.32E-159	1.018229751	0.306	0.179	1.31E-154	Tip-like
GOLIM4	7.44E-159	0.8331880016	0.384	0.248	4.21E-154	Tip-like
ADGRL4	8.98E-159	0.5149623986	0.713	0.598	5.09E-154	Tip-like
MBOAT7	3.12E-155	0.8129830904	0.251	0.135	1.77E-150	Tip-like
TSPAN14	5.75E-155	0.6089079316	0.473	0.331	3.26E-150	Tip-like
MPRIP	9.11E-155	0.6360422354	0.398	0.257	5.16E-150	Tip-like
PEA15	1.71E-154	0.5297646815	0.577	0.449	9.69E-150	Tip-like
PKN1	2.55E-154	0.6744159561	0.374	0.237	1.44E-149	Tip-like
HCLS1	3.24E-154	0.773437314	0.294	0.169	1.83E-149	Tip-like
GJA1	3.77E-153	0.6001950206	0.598	0.443	2.13E-148	Tip-like
SMTN	8.48E-152	0.9856739644	0.267	0.151	4.80E-147	Tip-like
SH3GLB1	2.73E-151	0.5169849153	0.6	0.468	1.55E-146	Tip-like
TCEB2	5.22E-151	0.6532289282	0.499	0.371	2.96E-146	Tip-like
CAP1	6.83E-151	0.5104571013	0.618	0.488	3.87E-146	Tip-like
YES1	1.92E-150	0.661414926	0.461	0.323	1.09E-145	Tip-like
PDIA3	1.63E-149	0.5064089528	0.727	0.622	9.25E-145	Tip-like
PON2	9.21E-149	0.5769888883	0.532	0.395	5.22E-144	Tip-like
PLEKHO1	4.66E-148	0.7272859006	0.354	0.223	2.64E-143	Tip-like
PNP	7.03E-147	0.5533349989	0.595	0.467	3.98E-142	Tip-like
COL6A1	3.30E-146	0.6439676985	0.302	0.177	1.87E-141	Tip-like
SHROOM4	8.30E-146	0.6849187559	0.365	0.231	4.70E-141	Tip-like
FHL3	5.62E-144	0.7278921879	0.259	0.143	3.19E-139	Tip-like
TBCD	1.28E-143	0.7266208961	0.344	0.217	7.23E-139	Tip-like
SPG7	1.41E-143	0.6961190844	0.385	0.254	8.00E-139	Tip-like
MYL91	4.15E-143	0.8048949118	0.405	0.279	2.35E-138	Tip-like
HLX	9.03E-143	0.9274683786	0.257	0.146	5.12E-138	Tip-like
TTYH3	9.24E-139	0.6699064609	0.287	0.169	5.23E-134	Tip-like
LRRC8A1	8.43E-138	0.6777945795	0.373	0.244	4.77E-133	Tip-like
LAPTM4B	3.49E-137	0.6206040687	0.446	0.313	1.98E-132	Tip-like
MAGI1	3.72E-136	0.600528736	0.428	0.293	2.11E-131	Tip-like
COMMD21	8.41E-135	0.8005428567	0.317	0.199	4.76E-130	Tip-like
WDFY1	2.10E-134	0.754958268	0.307	0.188	1.19E-129	Tip-like
PPM1F	6.65E-134	0.5903453982	0.382	0.252	3.77E-129	Tip-like
IL4R	8.44E-134	0.7055959666	0.322	0.2	4.78E-129	Tip-like
STRN4	1.30E-133	0.7986773456	0.253	0.144	7.34E-129	Tip-like
MYO1E1	4.26E-133	0.7145832713	0.351	0.226	2.41E-128	Tip-like
MEF2C	2.70E-131	0.5820768492	0.664	0.541	1.53E-126	Tip-like
DCHS1	5.27E-129	0.7015464446	0.326	0.207	2.99E-124	Tip-like
SURF4	6.34E-129	0.5510276599	0.438	0.308	3.59E-124	Tip-like
KIFC3	1.96E-126	0.6240144145	0.342	0.222	1.11E-121	Tip-like
ERLEC1	5.17E-125	0.664707779	0.426	0.303	2.93E-120	Tip-like
SSR3	1.14E-124	0.5805661314	0.508	0.393	6.44E-120	Tip-like
OAZ21	1.20E-120	0.5826655402	0.442	0.316	6.78E-116	Tip-like
CSGALNACT1	1.80E-120	0.6288279788	0.362	0.241	1.02E-115	Tip-like
ATP6AP11	4.48E-120	0.5353878486	0.452	0.328	2.54E-115	Tip-like
ZNF281	2.85E-119	0.7066857887	0.301	0.19	1.61E-114	Tip-like
MXD4	6.35E-119	0.7095251511	0.286	0.176	3.60E-114	Tip-like
STC11	9.90E-119	0.7329776342	0.394	0.271	5.60E-114	Tip-like
ATP5J2	1.33E-118	0.6436791843	0.357	0.242	7.53E-114	Tip-like
LPP	7.55E-118	0.5043821232	0.49	0.361	4.27E-113	Tip-like
CPNE21	1.89E-117	0.6206615764	0.302	0.191	1.07E-112	Tip-like
ADAM10	3.04E-115	0.5249328673	0.464	0.34	1.72E-110	Tip-like
DOCK91	4.32E-115	0.517217338	0.511	0.388	2.45E-110	Tip-like
UBALD2	7.60E-114	0.5768269256	0.313	0.201	4.30E-109	Tip-like
VCL	2.75E-113	0.6141035957	0.342	0.229	1.56E-108	Tip-like
HDAC1	1.17E-112	0.5547017367	0.406	0.288	6.61E-108	Tip-like
ITPRIP	1.41E-112	0.6004592555	0.398	0.277	7.97E-108	Tip-like
COTL1	2.77E-112	0.5885966719	0.526	0.419	1.57E-107	Tip-like
ANKRD28	6.10E-112	0.5168445744	0.459	0.334	3.45E-107	Tip-like
SLC16A3	2.80E-111	0.5937236571	0.288	0.181	1.59E-106	Tip-like
CEP170	8.69E-111	0.677791119	0.312	0.203	4.92E-106	Tip-like
BID	1.65E-110	0.6462322811	0.333	0.22	9.37E-106	Tip-like
NRIP1	1.70E-110	0.805172017	0.261	0.16	9.61E-106	Tip-like
PLEKHG1	1.74E-110	0.6604044192	0.375	0.26	9.83E-106	Tip-like
ABHD17A1	3.77E-110	0.5379171723	0.374	0.256	2.14E-105	Tip-like
MPZL1	8.14E-109	0.6264333987	0.359	0.245	4.61E-104	Tip-like
FKBP10	1.74E-108	0.534612456	0.359	0.243	9.88E-104	Tip-like
EMC8	1.92E-108	0.6558776926	0.299	0.191	1.08E-103	Tip-like
UFM1	1.92E-108	0.5354344106	0.434	0.317	1.09E-103	Tip-like
NOL4L	1.97E-108	0.6507979424	0.275	0.172	1.12E-103	Tip-like
DBN1	2.78E-108	0.5289272439	0.382	0.265	1.57E-103	Tip-like
RAPGEF21	3.00E-108	0.7454135343	0.256	0.157	1.70E-103	Tip-like
PTK2	1.24E-107	0.5251278103	0.396	0.278	7.04E-103	Tip-like
HMOX21	1.67E-107	0.5377362225	0.387	0.269	9.46E-103	Tip-like
CMTM3	2.34E-107	0.650582911	0.295	0.188	1.33E-102	Tip-like
ATP2A2	4.65E-106	0.5511159431	0.381	0.265	2.64E-101	Tip-like
C7orf73	8.43E-106	0.7399344025	0.25	0.153	4.77E-101	Tip-like
SLC39A7	2.58E-105	0.5963527514	0.332	0.223	1.46E-100	Tip-like
KIAA1551	3.75E-105	0.8641644677	0.25	0.154	2.13E-100	Tip-like
TWF2	4.49E-105	0.5798873467	0.378	0.266	2.54E-100	Tip-like
FAM114A1	1.94E-104	0.6371254531	0.321	0.215	1.10E-99	Tip-like
NT5E	8.74E-104	0.6257887186	0.306	0.201	4.95E-99	Tip-like
EVA1B	1.91E-102	0.7962895503	0.291	0.191	1.08E-97	Tip-like
DGKZ	1.11E-101	0.5859096195	0.303	0.198	6.27E-97	Tip-like
SRGAP2	1.17E-101	0.6729520255	0.281	0.18	6.62E-97	Tip-like
PDCL	2.41E-101	0.6384709715	0.305	0.201	1.36E-96	Tip-like
LINC00657	6.16E-101	0.7106834115	0.315	0.211	3.49E-96	Tip-like
TBC1D11	1.08E-100	0.5382307519	0.328	0.219	6.11E-96	Tip-like
CFAP201	1.94E-99	0.576038538	0.35	0.244	1.10E-94	Tip-like
ATPIF1	2.45E-99	0.5613014432	0.401	0.29	1.39E-94	Tip-like
FILIP11	8.62E-99	0.6685137191	0.292	0.19	4.88E-94	Tip-like
SEC13	1.69E-98	0.5427533373	0.399	0.291	9.54E-94	Tip-like
ARHGEF15	3.84E-98	0.5036888637	0.361	0.249	2.18E-93	Tip-like
C11orf31	4.57E-97	0.5644183838	0.415	0.31	2.59E-92	Tip-like
HK1	4.61E-97	0.5809093671	0.31	0.207	2.61E-92	Tip-like
SEC61A1	3.54E-96	0.5144942833	0.422	0.31	2.00E-91	Tip-like
USMG5	3.69E-96	0.5090193705	0.41	0.302	2.09E-91	Tip-like
PRRC2B	1.20E-95	0.5433862274	0.373	0.265	6.78E-91	Tip-like
ARCN1	1.47E-95	0.6412734642	0.282	0.184	8.33E-91	Tip-like
SCARF1	5.22E-94	0.5231569019	0.381	0.272	2.95E-89	Tip-like
LRRC8C	3.14E-93	0.6814288828	0.305	0.205	1.78E-88	Tip-like
TMEM21	9.71E-93	0.6520094402	0.339	0.236	5.50E-88	Tip-like
ARAP3	2.81E-91	0.5312762387	0.281	0.184	1.59E-86	Tip-like
VOPP11	1.16E-90	0.5393144768	0.353	0.246	6.57E-86	Tip-like
ADM	1.17E-89	0.7736676643	0.291	0.196	6.60E-85	Tip-like
VIMP	2.42E-89	0.6609755984	0.319	0.221	1.37E-84	Tip-like
NOTCH11	4.64E-89	0.5109250037	0.381	0.274	2.62E-84	Tip-like
UCK2	7.31E-87	0.5828803281	0.271	0.177	4.14E-82	Tip-like
ROCK2	1.06E-86	0.5135547549	0.39	0.285	5.99E-82	Tip-like
MGAT4A1	1.34E-86	0.5335911245	0.323	0.221	7.61E-82	Tip-like
EIF4G3	2.53E-86	0.5443939905	0.313	0.215	1.43E-81	Tip-like
IKBIP	1.30E-85	0.5184827966	0.371	0.269	7.35E-81	Tip-like
UBTD1	2.77E-85	0.5347052836	0.3	0.201	1.57E-80	Tip-like
ATP5C1	2.82E-85	0.5672634779	0.385	0.29	1.60E-80	Tip-like
PAPSS11	3.73E-85	0.5854059753	0.273	0.18	2.11E-80	Tip-like
BIRC6	4.59E-85	0.5263651554	0.352	0.25	2.60E-80	Tip-like
ABI31	1.77E-84	0.5146849875	0.357	0.255	1.00E-79	Tip-like
RIN2	1.38E-83	0.5845670015	0.297	0.202	7.83E-79	Tip-like
ATP5B	1.91E-83	0.5503198921	0.417	0.323	1.08E-78	Tip-like
LMBR1	5.60E-83	0.6088948519	0.29	0.197	3.17E-78	Tip-like
C19orf60	2.42E-82	0.5515366237	0.336	0.239	1.37E-77	Tip-like
RB1	3.76E-82	0.5253001097	0.339	0.241	2.13E-77	Tip-like
SOS12	4.61E-82	0.5145730456	0.263	0.173	2.61E-77	Tip-like
RAPGEF51	4.74E-82	0.5468906199	0.427	0.322	2.69E-77	Tip-like
MYEOV2	1.45E-81	0.551341346	0.331	0.236	8.21E-77	Tip-like
ATP5G31	4.38E-80	0.5213609864	0.368	0.272	2.48E-75	Tip-like
REST	2.60E-79	0.5678835583	0.309	0.216	1.47E-74	Tip-like
TSPAN18	8.84E-79	0.5679796387	0.301	0.208	5.00E-74	Tip-like
ATP11A	1.49E-77	0.6147180565	0.263	0.175	8.44E-73	Tip-like
PITPNC11	3.88E-77	0.536652854	0.326	0.232	2.20E-72	Tip-like
KLHL24	9.18E-77	0.5974923255	0.263	0.176	5.20E-72	Tip-like
KDM5B	7.29E-76	0.5420491481	0.251	0.165	4.13E-71	Tip-like
ITGAV	2.15E-75	0.5169128057	0.371	0.275	1.22E-70	Tip-like
ASAH11	1.81E-74	0.5256564742	0.357	0.263	1.02E-69	Tip-like
PTP4A1	1.89E-73	0.5137889298	0.261	0.173	1.07E-68	Tip-like
TMEM2431	2.06E-73	0.5121416314	0.255	0.17	1.16E-68	Tip-like
ATP6V1D	4.28E-69	0.5200110517	0.266	0.183	2.42E-64	Tip-like
NCOA3	5.18E-69	0.6255719785	0.25	0.171	2.94E-64	Tip-like
SUSD6	4.15E-68	0.5706802096	0.254	0.173	2.35E-63	Tip-like
PTPN11	7.20E-67	0.5347898395	0.279	0.196	4.07E-62	Tip-like
EFCAB141	5.03E-64	0.6093989517	0.361	0.274	2.85E-59	Tip-like
APOLD11	2.67E-50	0.5739942457	0.456	0.379	1.51E-45	Tip-like
ODC1	6.47E-39	0.5268331294	0.275	0.213	3.66E-34	Tip-like
CCL21	0	7.160757859	0.956	0.054	0	Lymphatic
TFF3	0	5.230829823	0.84	0.07	0	Lymphatic
PDPN	0	6.503758342	0.759	0.011	0	Lymphatic
MMRN1	0	3.742497474	0.813	0.175	0	Lymphatic
EFEMP1	0	5.465072376	0.664	0.04	0	Lymphatic
PROX1	0	5.096594888	0.619	0.045	0	Lymphatic
TFPI	0	3.534254026	0.935	0.369	0	Lymphatic
IGF1	0	6.673407731	0.513	0.008	0	Lymphatic
SEMA3A	0	5.646399232	0.521	0.018	0	Lymphatic
ATP5F1E	0	1.994918238	0.852	0.357	0	Lymphatic
TBX1	0	4.375306418	0.533	0.045	0	Lymphatic
AKAP12	0	2.940452273	0.603	0.127	0	Lymphatic
FAM107B	0	3.382226481	0.559	0.089	0	Lymphatic
BEX3	0	2.571139702	0.634	0.169	0	Lymphatic
CAVIN2	0	2.666079984	0.594	0.131	0	Lymphatic
RACK1	0	1.168320811	0.799	0.343	0	Lymphatic
ATP5MPL	0	1.906680472	0.68	0.228	0	Lymphatic
CCDC80	0	2.909695226	0.566	0.114	0	Lymphatic
ATP5MG	0	1.611843149	0.715	0.266	0	Lymphatic
ELOB	0	1.482614291	0.716	0.275	0	Lymphatic
ATP5MC2	0	1.468873303	0.705	0.267	0	Lymphatic
ATP5ME	0	1.535681319	0.671	0.243	0	Lymphatic
LYVE1	0	3.946093098	0.513	0.087	0	Lymphatic
SEM1	0	1.467092669	0.671	0.245	0	Lymphatic
CYTOR	0	2.633785963	0.56	0.136	0	Lymphatic
MRC1	0	5.969226284	0.43	0.01	0	Lymphatic
LAPTM5	0	2.550079227	0.596	0.179	0	Lymphatic
ATP5MD	0	1.561838242	0.632	0.225	0	Lymphatic
EFNA5	0	6.450073716	0.414	0.007	0	Lymphatic
ATP5MF	0	1.788422047	0.597	0.19	0	Lymphatic
MAF	0	3.541481915	0.454	0.056	0	Lymphatic
MFAP2	0	3.053262429	0.487	0.089	0	Lymphatic
SELENOM	0	1.653170215	0.596	0.202	0	Lymphatic
ECSCR	0	1.438609244	0.718	0.327	0	Lymphatic
SELENOH	0	1.645610946	0.581	0.19	0	Lymphatic
GYPC	0	1.884244571	0.698	0.31	0	Lymphatic
PTPRE	0	2.038085851	0.705	0.317	0	Lymphatic
RELN	0	7.88843699	0.383	0.003	0	Lymphatic
ATP5PO	0	1.916101662	0.526	0.146	0	Lymphatic
FN11	0	1.175870873	0.724	0.345	0	Lymphatic
TCEAL9	0	1.740775095	0.556	0.178	0	Lymphatic
TRIR	0	1.440297881	0.596	0.218	0	Lymphatic
FLT4	0	2.512623451	0.541	0.164	0	Lymphatic
ADD3	0	2.210026814	0.591	0.215	0	Lymphatic
COLEC12	0	5.916246182	0.378	0.009	0	Lymphatic
TSPAN5	0	3.063259393	0.452	0.086	0	Lymphatic
ATP5F1D	0	1.391471423	0.58	0.214	0	Lymphatic
ANGPT21	0	2.311865248	0.656	0.292	0	Lymphatic
LAYN	0	2.335934738	0.532	0.169	0	Lymphatic
ATP5IF1	0	1.47005009	0.572	0.21	0	Lymphatic
C1R	0	2.843362698	0.505	0.145	0	Lymphatic
SLC38A1	0	2.916321979	0.456	0.096	0	Lymphatic
COPS9	0	1.391533551	0.558	0.201	0	Lymphatic
RBP1	0	3.058892623	0.473	0.116	0	Lymphatic
SELENOP	0	2.482836988	0.467	0.112	0	Lymphatic
PARD6G	0	6.05709553	0.363	0.008	0	Lymphatic
LHFPL6	0	2.261113705	0.465	0.111	0	Lymphatic
SGIP1	0	3.791170732	0.381	0.033	0	Lymphatic
ATP5PF	0	0.9916061006	0.588	0.24	0	Lymphatic
FAM174B	0	3.28314396	0.399	0.053	0	Lymphatic
NR2F1	0	4.538670926	0.372	0.026	0	Lymphatic
EMILIN1	0	5.606492286	0.353	0.009	0	Lymphatic
FABP51	0	1.670584312	0.847	0.505	0	Lymphatic
C4orf48	0	1.587802618	0.681	0.342	0	Lymphatic
MDK	0	2.127141939	0.657	0.32	0	Lymphatic
SELENOW	0	0.5151515587	0.639	0.303	0	Lymphatic
ATP5F1B	0	1.340741309	0.532	0.198	0	Lymphatic
CYBA	0	1.806163236	0.69	0.357	0	Lymphatic
MAN1A1	0	2.240074387	0.511	0.183	0	Lymphatic
PIEZO2	0	3.009566853	0.374	0.049	0	Lymphatic
NDUFB8	0	1.503111373	0.584	0.26	0	Lymphatic
STMN11	0	1.516295958	0.755	0.432	0	Lymphatic
SELENOF	0	1.551022651	0.484	0.162	0	Lymphatic
CTHRC1	0	1.609330504	0.668	0.349	0	Lymphatic
RTRAF	0	1.431608376	0.494	0.175	0	Lymphatic
DKK3	0	3.266285921	0.366	0.049	0	Lymphatic
ATP5F1C	0	1.448546599	0.483	0.166	0	Lymphatic
ELOC	0	1.34157739	0.494	0.178	0	Lymphatic
ITM2C	0	4.417737907	0.333	0.018	0	Lymphatic
MARCKS	0	1.612529038	0.795	0.481	0	Lymphatic
SNCA	0	2.325853688	0.443	0.129	0	Lymphatic
NOP53	0	0.8912103867	0.54	0.227	0	Lymphatic
ATP5MC3	0	1.535893452	0.467	0.156	0	Lymphatic
VPS35L	0	3.311248773	0.355	0.044	0	Lymphatic
KRT18	0	2.162291593	0.482	0.178	0	Lymphatic
ATP5PD	0	1.287199937	0.47	0.172	0	Lymphatic
SELENOS	0	1.338080924	0.463	0.166	0	Lymphatic
SELENOT	0	1.840569007	0.414	0.117	0	Lymphatic
ADGRG3	0	5.96212551	0.301	0.005	0	Lymphatic
POLR2J3.1	0	2.029664728	0.363	0.07	0	Lymphatic
ATP5F1A	0	1.41907117	0.453	0.161	0	Lymphatic
DOCK5	0	4.81167879	0.306	0.014	0	Lymphatic
TSTA3	0	2.052293921	0.479	0.189	0	Lymphatic
CD47	0	1.761764982	0.574	0.285	0	Lymphatic
CISD1	0	1.842588157	0.569	0.28	0	Lymphatic
PPP1R2	0	1.647969701	0.634	0.347	0	Lymphatic
SPHK1	0	1.648865341	0.568	0.282	0	Lymphatic
PPFIBP1	0	1.629943196	0.738	0.453	0	Lymphatic
ATP5MC1	0	1.408846911	0.435	0.151	0	Lymphatic
GRAP	0	2.412885915	0.375	0.092	0	Lymphatic
HES41	0	1.681819265	0.463	0.181	0	Lymphatic
CNPY2	0	1.340590603	0.53	0.249	0	Lymphatic
NINJ1	0	2.059125942	0.469	0.189	0	Lymphatic
PCAT19	0	1.15873667	0.706	0.426	0	Lymphatic
WFS1	0	2.730500158	0.352	0.074	0	Lymphatic
RGS16	0	1.54448963	0.599	0.323	0	Lymphatic
STXBP6	0	4.173997563	0.289	0.015	0	Lymphatic
NRP21	0	1.555507191	0.628	0.355	0	Lymphatic
LY96	0	1.563321912	0.545	0.275	0	Lymphatic
CLDN51	0	1.516196445	0.872	0.605	0	Lymphatic
PSMA2	0	1.42588172	0.546	0.279	0	Lymphatic
GGA1	0	1.867042773	0.403	0.137	0	Lymphatic
PCBD1	0	2.06574429	0.419	0.153	0	Lymphatic
RARRES2	0	3.283494898	0.301	0.035	0	Lymphatic
LIMS1	0	1.573956142	0.734	0.468	0	Lymphatic
NDUFA13	0	1.314286652	0.703	0.438	0	Lymphatic
MZT2B	0	1.2501359	0.696	0.433	0	Lymphatic
AC245595.1	0	3.816075181	0.286	0.023	0	Lymphatic
ATP5PB	0	1.339167037	0.407	0.146	0	Lymphatic
NDUFC2	0	0.9249644109	0.666	0.406	0	Lymphatic
SMIM26	0	1.451385513	0.391	0.131	0	Lymphatic
KCTD17	0	2.764376116	0.321	0.062	0	Lymphatic
PET100	0	1.163538502	0.642	0.384	0	Lymphatic
FAM43A	0	1.567981805	0.528	0.271	0	Lymphatic
SELENOK	0	1.036366507	0.428	0.171	0	Lymphatic
NDUFA11	0	1.106841572	0.689	0.432	0	Lymphatic
SLC24A1	0	3.360935102	0.304	0.048	0	Lymphatic
EPB41L2	0	2.004301408	0.382	0.128	0	Lymphatic
CHCHD10	0	1.74189228	0.42	0.167	0	Lymphatic
SELENON	0	1.729383321	0.363	0.11	0	Lymphatic
MCRIP1	0	1.610475065	0.365	0.112	0	Lymphatic
ACKR2	0	6.856573373	0.255	0.003	0	Lymphatic
RCSD1	0	3.792533552	0.274	0.023	0	Lymphatic
SCN3B	0	3.808179879	0.291	0.04	0	Lymphatic
ELN1	0	1.616724581	0.384	0.134	0	Lymphatic
OAF	0	1.724370565	0.496	0.246	0	Lymphatic
SMIM30	0	1.891627406	0.34	0.09	0	Lymphatic
MSMP	0	4.743755649	0.259	0.01	0	Lymphatic
APOD	0	2.154900496	0.371	0.124	0	Lymphatic
CEBPD1	0	1.093034364	0.608	0.361	0	Lymphatic
BCL7C	0	1.646202293	0.438	0.192	0	Lymphatic
CCND11	0	1.128582606	0.526	0.281	0	Lymphatic
NBDY	0	1.184074649	0.398	0.154	0	Lymphatic
TSN	0	1.879143494	0.429	0.186	0	Lymphatic
FHL11	0	1.942678936	0.362	0.122	0	Lymphatic
LAMA41	0	0.7248199404	0.678	0.441	0	Lymphatic
TNFRSF42	0	0.8029055586	0.424	0.187	0	Lymphatic
ACKR3	0	1.567196423	0.377	0.141	0	Lymphatic
NR2F21	0	1.083254173	0.586	0.35	0	Lymphatic
SQOR	0	2.511751476	0.291	0.055	0	Lymphatic
FAM102A	0	3.763682454	0.263	0.028	0	Lymphatic
UNC5B2	0	1.456100105	0.352	0.117	0	Lymphatic
PALM	0	2.474407533	0.317	0.083	0	Lymphatic
PMF1	0	1.55427824	0.358	0.125	0	Lymphatic
CCL2	0	1.889940709	0.526	0.294	0	Lymphatic
KANK3	0	1.28969062	0.552	0.32	0	Lymphatic
TLE1	0	2.05687681	0.336	0.104	0	Lymphatic
GLIPR2	0	2.952402776	0.269	0.037	0	Lymphatic
SGCE	0	3.515293248	0.259	0.027	0	Lymphatic
NNMT	0	1.160079484	0.793	0.561	0	Lymphatic
RAB11FIP1	0	3.120244085	0.281	0.05	0	Lymphatic
LIMD2	0	2.258148592	0.315	0.084	0	Lymphatic
RTF2	0	1.44791034	0.343	0.113	0	Lymphatic
ISG20	0	1.629552567	0.414	0.184	0	Lymphatic
LGALS11	0	1.154599093	0.86	0.631	0	Lymphatic
SIRPA	0	2.094266927	0.339	0.111	0	Lymphatic
CD82	0	2.807204409	0.274	0.049	0	Lymphatic
GALNT1	0	1.376430691	0.439	0.214	0	Lymphatic
CDC42EP5	0	1.57158553	0.417	0.192	0	Lymphatic
METTL26	0	1.396305933	0.336	0.112	0	Lymphatic
VKORC1	0	0.9306525426	0.505	0.282	0	Lymphatic
DMTN	0	2.718930939	0.292	0.069	0	Lymphatic
AC020916.1	0	1.587303871	0.322	0.1	0	Lymphatic
MRPL14	0	1.336580381	0.461	0.24	0	Lymphatic
PDE4B	0	1.554640778	0.392	0.171	0	Lymphatic
AEBP1	0	1.722732162	0.353	0.135	0	Lymphatic
SERPING1	0	1.021255588	0.598	0.38	0	Lymphatic
TCTN3	0	2.78497642	0.351	0.134	0	Lymphatic
SMYD2	0	2.450873457	0.295	0.079	0	Lymphatic
DMAC1	0	1.560436205	0.308	0.093	0	Lymphatic
MESD	0	1.362404148	0.327	0.113	0	Lymphatic
ASGR1	0	2.555421278	0.283	0.069	0	Lymphatic
MCUB	0	1.969635671	0.282	0.07	0	Lymphatic
UFD1	0	1.407534205	0.319	0.108	0	Lymphatic
REX1BD	0	0.9328072112	0.365	0.154	0	Lymphatic
NDUFB1	0	0.7939337769	0.665	0.455	0	Lymphatic
CCDC71L	0	1.983749815	0.299	0.089	0	Lymphatic
CEBPB	0	1.640630041	0.347	0.138	0	Lymphatic
SYNM	0	2.287692215	0.269	0.062	0	Lymphatic
PLSCR4	0	1.65124022	0.358	0.151	0	Lymphatic
TMBIM4	0	1.024466788	0.618	0.412	0	Lymphatic
MAP4K2	0	2.564597342	0.26	0.057	0	Lymphatic
TIE1	0	1.159824611	0.701	0.498	0	Lymphatic
CHMP4A	0	1.149016043	0.41	0.21	0	Lymphatic
FRMD6	0	2.555021317	0.26	0.061	0	Lymphatic
NBL1	0	1.288083049	0.386	0.187	0	Lymphatic
JPT1	0	1.383534673	0.295	0.096	0	Lymphatic
PDLIM3	0	1.448778361	0.376	0.178	0	Lymphatic
CMTM7	0	1.616297521	0.313	0.116	0	Lymphatic
SLIRP	0	0.9744978114	0.634	0.437	0	Lymphatic
RAB5IF	0	1.353415632	0.3	0.103	0	Lymphatic
LYN	0	1.40157058	0.381	0.185	0	Lymphatic
TMED3	0	1.48214671	0.367	0.172	0	Lymphatic
FHL31	0	1.502888645	0.331	0.137	0	Lymphatic
DNPH1	0	1.578896918	0.331	0.138	0	Lymphatic
SPSB1	0	1.726115487	0.322	0.129	0	Lymphatic
STMP1	0	1.203645935	0.306	0.113	0	Lymphatic
PGM5	0	1.889210191	0.307	0.115	0	Lymphatic
HIKESHI	0	1.473848992	0.28	0.089	0	Lymphatic
C1S	0	2.419116474	0.257	0.066	0	Lymphatic
NAXE	0	2.069277234	0.25	0.059	0	Lymphatic
NUPR1	0	1.849246206	0.329	0.141	0	Lymphatic
HOMER3	0	1.845174007	0.297	0.11	0	Lymphatic
MYCT1	0	1.23209557	0.615	0.429	0	Lymphatic
SMIM37	0	1.236873349	0.274	0.089	0	Lymphatic
RPL36A	0	0.9300921337	0.85	0.665	0	Lymphatic
HPF1	0	1.771443156	0.252	0.068	0	Lymphatic
PRR5	0	2.03801545	0.265	0.082	0	Lymphatic
ITGA9	0	1.596187834	0.308	0.126	0	Lymphatic
MYH10	0	1.842611639	0.286	0.104	0	Lymphatic
DUSP6	0	1.048507997	0.665	0.484	0	Lymphatic
TMEM120A	0	1.843967547	0.295	0.114	0	Lymphatic
FAM89A	0	1.652360803	0.278	0.098	0	Lymphatic
DDB2	0	1.783898873	0.284	0.104	0	Lymphatic
UQCR11	0	1.043461305	0.773	0.596	0	Lymphatic
LINC01235	0	1.586130796	0.279	0.104	0	Lymphatic
BUD23	0	1.255101611	0.273	0.099	0	Lymphatic
TIMP1	0	2.856756023	0.899	0.728	0	Lymphatic
PDXK	0	1.539622554	0.283	0.113	0	Lymphatic
NDUFAF8	0	1.306757688	0.261	0.093	0	Lymphatic
CENPX	0	1.195141437	0.264	0.096	0	Lymphatic
PRELID1	0	1.067509194	0.678	0.511	0	Lymphatic
CALD1	0	0.8028493273	0.837	0.671	0	Lymphatic
CD91	0	1.060191817	0.854	0.692	0	Lymphatic
TUBA1A	0	0.9476609894	0.736	0.577	0	Lymphatic
BMP2K	0	1.839907353	0.254	0.095	0	Lymphatic
RPS17	0	0.5651231942	0.813	0.679	0	Lymphatic
POLR2L	0	1.012157492	0.838	0.708	0	Lymphatic
RAB11A	0	0.7806449935	0.79	0.666	0	Lymphatic
S100A16	0	0.8930921001	0.75	0.627	0	Lymphatic
MGST2	0	1.011381217	0.737	0.616	0	Lymphatic
KLF6	0	0.8669024662	0.855	0.746	0	Lymphatic
SUB1	0	0.9150989223	0.764	0.662	0	Lymphatic
RPS20	0	0.5452227113	0.869	0.778	0	Lymphatic
OAZ1	0	0.8063679718	0.817	0.729	0	Lymphatic
ANXA2	0	0.8058467848	0.908	0.821	0	Lymphatic
RPS29	0	0.7605618099	0.928	0.844	0	Lymphatic
HSPB1	0	0.7246350215	0.936	0.853	0	Lymphatic
CD63	0	0.6067020082	0.903	0.855	0	Lymphatic
RPL27A	0	0.6589695461	0.919	0.874	0	Lymphatic
GNG11	0	0.826602424	0.912	0.87	0	Lymphatic
RPL31	0	0.6044756121	0.879	0.847	0	Lymphatic
RPL13A	0	0.9791052794	0.956	0.926	0	Lymphatic
RPL41	0	0.6947403892	0.979	0.965	0	Lymphatic
HLA-A	0	0.6531556953	0.965	0.957	0	Lymphatic
TIMP2	2.06E-303	1.053409821	0.568	0.361	1.17E-298	Lymphatic
NDUFA3	1.76E-302	0.8812018305	0.591	0.389	9.95E-298	Lymphatic
GMFG1	2.91E-298	0.827021506	0.662	0.485	1.65E-293	Lymphatic
STX7	1.99E-297	1.376863365	0.347	0.165	1.13E-292	Lymphatic
OST4	1.40E-295	0.6305768633	0.806	0.714	7.92E-291	Lymphatic
MRPL52	5.36E-291	0.9539871017	0.586	0.407	3.03E-286	Lymphatic
ERICH1	1.33E-289	1.177405142	0.485	0.286	7.52E-285	Lymphatic
COX7A2	7.74E-289	0.6142944753	0.778	0.692	4.38E-284	Lymphatic
MYL6B	1.03E-288	1.254496936	0.381	0.197	5.83E-284	Lymphatic
H1FX	2.00E-285	1.080974965	0.526	0.331	1.13E-280	Lymphatic
SERPINB9	4.13E-278	1.358457485	0.332	0.158	2.34E-273	Lymphatic
ARL4A	1.43E-277	0.9131941463	0.687	0.515	8.11E-273	Lymphatic
NARF	3.51E-274	1.047823762	0.5	0.313	1.99E-269	Lymphatic
LAPTM4A	1.09E-273	0.6765855139	0.789	0.713	6.16E-269	Lymphatic
FABP42	2.66E-273	0.7402583932	0.396	0.201	1.51E-268	Lymphatic
COX7C	2.89E-273	0.5267492835	0.833	0.764	1.64E-268	Lymphatic
FBLIM11	3.19E-273	1.203682088	0.297	0.129	1.81E-268	Lymphatic
MPST	4.16E-273	1.322911136	0.352	0.176	2.36E-268	Lymphatic
CYR61	9.72E-273	1.464038597	0.602	0.469	5.51E-268	Lymphatic
TGFB1	1.02E-271	0.9929957313	0.546	0.362	5.80E-267	Lymphatic
NECTIN2	1.92E-271	0.5966638035	0.42	0.201	1.09E-266	Lymphatic
RTL8C	1.06E-269	1.067484742	0.27	0.109	6.02E-265	Lymphatic
NORAD	4.63E-268	0.8201415445	0.343	0.155	2.62E-263	Lymphatic
REXO2	2.05E-267	1.001976032	0.595	0.438	1.16E-262	Lymphatic
TUBB6	6.34E-266	1.047339173	0.584	0.42	3.59E-261	Lymphatic
GSTO1	1.25E-265	0.9098922622	0.62	0.464	7.07E-261	Lymphatic
INO80C	8.21E-262	1.296824224	0.337	0.167	4.65E-257	Lymphatic
CMTM31	2.57E-258	1.173841298	0.357	0.183	1.45E-253	Lymphatic
TRIP6	3.00E-257	1.351632248	0.251	0.104	1.70E-252	Lymphatic
AFDN	2.46E-254	0.9824194227	0.286	0.123	1.39E-249	Lymphatic
BCAR1	3.19E-254	1.126082019	0.438	0.256	1.81E-249	Lymphatic
SEMA6A	1.84E-253	1.271709377	0.384	0.206	1.04E-248	Lymphatic
CASC15	3.32E-249	1.341300148	0.321	0.158	1.88E-244	Lymphatic
PHPT1	1.28E-247	0.8752817057	0.595	0.43	7.23E-243	Lymphatic
SEC61G	2.37E-246	0.6353629506	0.732	0.603	1.34E-241	Lymphatic
DST1	9.42E-246	1.23961057	0.429	0.25	5.33E-241	Lymphatic
CD200	1.07E-244	1.099889452	0.519	0.34	6.06E-240	Lymphatic
FDPS	1.65E-242	0.8140363027	0.628	0.461	9.33E-238	Lymphatic
SH3GL1	4.48E-242	1.216082538	0.379	0.211	2.54E-237	Lymphatic
DSP	1.59E-240	1.605273126	0.277	0.128	9.00E-236	Lymphatic
CALM2	2.14E-240	0.5322280895	0.811	0.736	1.21E-235	Lymphatic
NT5C	5.63E-239	1.291416614	0.293	0.138	3.19E-234	Lymphatic
SRSF9	8.41E-239	0.826635981	0.57	0.408	4.76E-234	Lymphatic
ARL6IP1	1.17E-238	0.9242445934	0.635	0.475	6.60E-234	Lymphatic
SMS1	1.89E-238	1.031008091	0.303	0.144	1.07E-233	Lymphatic
CCT5	4.24E-238	1.051789637	0.521	0.363	2.40E-233	Lymphatic
UBTD11	2.64E-237	1.146578804	0.363	0.195	1.49E-232	Lymphatic
ARHGAP29	7.63E-237	0.6655403328	0.782	0.666	4.32E-232	Lymphatic
DEGS1	2.02E-236	1.037009544	0.464	0.29	1.15E-231	Lymphatic
TUBB	1.87E-232	0.697282882	0.744	0.637	1.06E-227	Lymphatic
UQCRQ	7.66E-231	0.6039283682	0.73	0.62	4.34E-226	Lymphatic
SOX4	1.63E-228	0.8460677761	0.689	0.526	9.25E-224	Lymphatic
CNKSR3	1.10E-225	0.995383656	0.453	0.27	6.25E-221	Lymphatic
MRPL12	1.38E-224	1.022773739	0.287	0.135	7.82E-220	Lymphatic
RPS27L	9.16E-223	0.6946213089	0.735	0.629	5.19E-218	Lymphatic
MAP1LC3A	4.23E-222	0.9408833098	0.533	0.363	2.40E-217	Lymphatic
COMT1	5.59E-222	0.901740162	0.563	0.406	3.16E-217	Lymphatic
PSMA4	7.15E-219	0.7091803566	0.613	0.467	4.05E-214	Lymphatic
EPSTI1	1.65E-218	1.329509854	0.259	0.12	9.33E-214	Lymphatic
MARCKSL11	2.69E-217	0.6114956909	0.753	0.634	1.52E-212	Lymphatic
TXN	1.30E-216	0.727201688	0.777	0.673	7.34E-212	Lymphatic
CTSZ	1.48E-215	1.035268449	0.477	0.312	8.39E-211	Lymphatic
SNX2	1.40E-214	1.153313285	0.379	0.222	7.94E-210	Lymphatic
TMEM205	1.29E-211	0.9288655053	0.497	0.33	7.30E-207	Lymphatic
TIMM13	4.96E-208	0.8052465439	0.548	0.397	2.81E-203	Lymphatic
PTMS	6.45E-206	0.569624968	0.792	0.689	3.65E-201	Lymphatic
CDC25B	6.58E-206	1.173876188	0.334	0.18	3.72E-201	Lymphatic
SMAD1	1.23E-205	1.170961372	0.51	0.351	6.96E-201	Lymphatic
SLC25A6	1.52E-205	0.585775559	0.762	0.697	8.61E-201	Lymphatic
NAGK	8.75E-204	1.183603466	0.326	0.177	4.95E-199	Lymphatic
UQCR10	1.10E-203	0.7036842697	0.588	0.434	6.24E-199	Lymphatic
FTH1	1.61E-203	0.7495042183	0.946	0.934	9.11E-199	Lymphatic
ROMO1	3.01E-203	0.6313386602	0.648	0.497	1.70E-198	Lymphatic
GABPB1-AS1	4.37E-203	1.386300741	0.287	0.144	2.47E-198	Lymphatic
HDGFL3	2.19E-202	0.8307700466	0.268	0.123	1.24E-197	Lymphatic
CTSL	4.91E-202	0.8470229157	0.555	0.398	2.78E-197	Lymphatic
GADD45GIP1	5.06E-201	0.7021638992	0.647	0.517	2.86E-196	Lymphatic
NEDD8	6.62E-201	0.6020696367	0.721	0.621	3.75E-196	Lymphatic
DYNC1I2	2.65E-200	0.6808441096	0.551	0.376	1.50E-195	Lymphatic
BLOC1S1	6.74E-200	0.5725377442	0.456	0.272	3.82E-195	Lymphatic
SVIL1	2.74E-199	0.8781922901	0.469	0.301	1.55E-194	Lymphatic
TRAPPC6A	1.48E-198	1.114981476	0.299	0.155	8.40E-194	Lymphatic
COMMD3	2.52E-197	1.056950211	0.266	0.128	1.43E-192	Lymphatic
ANKH	1.92E-195	1.170290817	0.266	0.129	1.09E-190	Lymphatic
IL322	1.99E-195	0.5801619612	0.62	0.438	1.13E-190	Lymphatic
MAGED1	3.30E-195	1.253082386	0.319	0.175	1.87E-190	Lymphatic
CD99	3.70E-195	0.5174617662	0.831	0.776	2.09E-190	Lymphatic
NDUFA1	8.76E-194	0.5841163141	0.703	0.577	4.96E-189	Lymphatic
COX6B1	1.62E-192	0.5363112527	0.75	0.663	9.16E-188	Lymphatic
MED10	2.41E-192	0.852892404	0.492	0.331	1.36E-187	Lymphatic
ANXA5	2.59E-192	0.6462920603	0.731	0.619	1.46E-187	Lymphatic
ZDHHC12	4.36E-192	1.146820492	0.255	0.122	2.47E-187	Lymphatic
6-3월	5.60E-192	0.994779496	0.407	0.248	3.17E-187	Lymphatic
JUP1	1.18E-191	0.7815062477	0.46	0.28	6.70E-187	Lymphatic
TMEM50A	3.77E-190	0.5954822868	0.704	0.598	2.14E-185	Lymphatic
RARRES3	6.30E-190	1.57419101	0.266	0.135	3.57E-185	Lymphatic
SULF2	9.60E-190	0.9527220003	0.502	0.346	5.44E-185	Lymphatic
TIMM8B	6.14E-188	0.7594801398	0.517	0.361	3.48E-183	Lymphatic
CAPZA1	2.47E-187	0.8547568023	0.456	0.3	1.40E-182	Lymphatic
CARHSP1	5.99E-187	0.8010802045	0.576	0.438	3.39E-182	Lymphatic
AIG1	1.12E-186	1.16447026	0.279	0.142	6.36E-182	Lymphatic
PPP1R14B	1.65E-186	0.9020175676	0.403	0.243	9.37E-182	Lymphatic
N4BP2L2	5.83E-186	0.6952876552	0.699	0.545	3.30E-181	Lymphatic
HHEX	9.91E-186	1.153691384	0.448	0.301	5.61E-181	Lymphatic
PIN4	9.58E-185	0.8709472718	0.405	0.249	5.42E-180	Lymphatic
SNRPE	5.34E-184	0.6933946456	0.572	0.419	3.03E-179	Lymphatic
SPCS2	2.61E-183	0.6347626101	0.642	0.508	1.48E-178	Lymphatic
FAM126A	4.26E-183	1.377816588	0.275	0.143	2.41E-178	Lymphatic
GNG12	1.41E-181	1.050152677	0.394	0.241	8.01E-177	Lymphatic
PEPD	1.54E-180	0.9943384444	0.409	0.26	8.72E-176	Lymphatic
COX171	3.07E-180	0.5792562715	0.582	0.421	1.74E-175	Lymphatic
NDUFB7	2.10E-179	0.6227172061	0.631	0.501	1.19E-174	Lymphatic
ERH	7.16E-179	0.595259704	0.685	0.579	4.05E-174	Lymphatic
PSMB7	4.62E-178	0.7331350941	0.519	0.372	2.62E-173	Lymphatic
FAM118A	8.81E-177	1.295055475	0.322	0.181	4.99E-172	Lymphatic
APLP21	1.50E-176	0.5480527345	0.737	0.63	8.49E-172	Lymphatic
ADM1	1.92E-175	1.295929775	0.335	0.193	1.09E-170	Lymphatic
LINC01116	1.53E-174	1.167243458	0.3	0.165	8.65E-170	Lymphatic
STAT1	2.91E-174	1.196921751	0.36	0.218	1.65E-169	Lymphatic
REEP3	5.47E-173	0.8263784256	0.422	0.269	3.10E-168	Lymphatic
MPG	6.82E-173	0.8874600662	0.466	0.322	3.86E-168	Lymphatic
DYNLT1	2.53E-172	0.7105409401	0.575	0.442	1.43E-167	Lymphatic
GIPC1	2.58E-171	0.9876725378	0.277	0.144	1.46E-166	Lymphatic
NFATC1	4.20E-171	1.322612468	0.323	0.187	2.38E-166	Lymphatic
NME1	6.38E-171	0.8786750834	0.414	0.266	3.61E-166	Lymphatic
ATP6V0E1	9.66E-171	0.522864996	0.746	0.665	5.47E-166	Lymphatic
CXXC5	1.41E-170	1.115766249	0.265	0.137	7.99E-166	Lymphatic
ZFHX3	5.00E-170	1.026162942	0.321	0.18	2.83E-165	Lymphatic
SIPA1	1.77E-169	1.119490749	0.26	0.132	1.00E-164	Lymphatic
SRM	4.97E-167	0.9310101358	0.363	0.221	2.82E-162	Lymphatic
UROS	1.91E-165	1.083608966	0.269	0.141	1.08E-160	Lymphatic
ADAM101	2.69E-164	0.8325736159	0.49	0.341	1.52E-159	Lymphatic
SRP19	1.28E-163	0.7675379499	0.311	0.17	7.24E-159	Lymphatic
ITIH51	1.54E-163	0.80894089	0.306	0.166	8.73E-159	Lymphatic
PDLIM4	4.31E-163	1.038636012	0.418	0.271	2.44E-158	Lymphatic
SHC1	6.22E-163	0.8643796159	0.575	0.44	3.52E-158	Lymphatic
RASGRP31	7.73E-163	0.8319875178	0.448	0.289	4.38E-158	Lymphatic
MSRB2	1.36E-162	0.973376029	0.282	0.151	7.70E-158	Lymphatic
SSBP4	2.13E-162	0.9357800819	0.357	0.216	1.21E-157	Lymphatic
TMEM123	5.61E-162	0.7162677427	0.555	0.42	3.17E-157	Lymphatic
VAMP2	9.69E-162	0.6014739603	0.483	0.321	5.49E-157	Lymphatic
HNRNPH2	1.98E-161	0.7933521655	0.35	0.207	1.12E-156	Lymphatic
AKR1C3	2.72E-161	0.9667607552	0.37	0.224	1.54E-156	Lymphatic
TRAPPC1	4.70E-161	0.6800432072	0.573	0.447	2.66E-156	Lymphatic
CTSD	1.38E-160	0.6928150074	0.55	0.412	7.83E-156	Lymphatic
MZT2A	3.64E-160	0.8621322316	0.41	0.265	2.06E-155	Lymphatic
ADI1	4.00E-160	0.8599667009	0.391	0.248	2.27E-155	Lymphatic
RFXANK	1.97E-159	0.9486454863	0.343	0.206	1.11E-154	Lymphatic
HIGD1A	1.73E-157	0.7817632192	0.266	0.138	9.81E-153	Lymphatic
SLC27A3	1.76E-153	1.187602156	0.28	0.156	9.95E-149	Lymphatic
TBCA	6.98E-153	0.572724391	0.661	0.548	3.95E-148	Lymphatic
CETN2	4.34E-152	0.9850887997	0.259	0.137	2.45E-147	Lymphatic
S100A41	8.49E-152	1.016081203	0.357	0.216	4.81E-147	Lymphatic
ATP6V1F	4.73E-151	0.634882951	0.61	0.495	2.68E-146	Lymphatic
PTP4A2	6.40E-151	0.6626766037	0.504	0.362	3.62E-146	Lymphatic
CASP4	1.20E-150	0.8060517117	0.487	0.35	6.80E-146	Lymphatic
ARID1B	4.98E-150	0.9759822954	0.359	0.219	2.82E-145	Lymphatic
REEP5	1.19E-145	0.6267943259	0.607	0.494	6.74E-141	Lymphatic
TAX1BP31	2.92E-145	0.6550442893	0.501	0.363	1.65E-140	Lymphatic
UQCC2	3.84E-145	0.7604048197	0.352	0.215	2.17E-140	Lymphatic
VPS25	1.43E-143	0.8912636206	0.319	0.191	8.10E-139	Lymphatic
CFL2	2.01E-143	0.9251834991	0.31	0.182	1.14E-138	Lymphatic
POLR2I	5.78E-143	0.6579575514	0.488	0.348	3.27E-138	Lymphatic
ACTN11	6.37E-143	0.5191863595	0.679	0.538	3.61E-138	Lymphatic
FAM200B	8.24E-143	0.9598230511	0.309	0.183	4.67E-138	Lymphatic
MRPS6	1.07E-142	0.8890178198	0.345	0.212	6.05E-138	Lymphatic
NTAN1	1.22E-141	0.9259843588	0.393	0.262	6.90E-137	Lymphatic
RPGR	1.38E-141	0.90314983	0.366	0.23	7.83E-137	Lymphatic
HMGN1	1.50E-140	0.5163937331	0.667	0.571	8.50E-136	Lymphatic
SAT2	1.98E-140	0.8194489002	0.443	0.306	1.12E-135	Lymphatic
MIR4435-2HG2	5.18E-138	0.642859481	0.422	0.274	2.93E-133	Lymphatic
TSHZ2	2.80E-137	0.6716820093	0.591	0.441	1.58E-132	Lymphatic
CTSS	1.54E-136	0.8596477425	0.401	0.27	8.71E-132	Lymphatic
CCNDBP1	1.56E-135	0.9264738744	0.286	0.166	8.85E-131	Lymphatic
UROD	3.61E-135	0.8860673998	0.358	0.228	2.04E-130	Lymphatic
NDUFS7	2.49E-134	0.6652597443	0.532	0.409	1.41E-129	Lymphatic
NDUFA9	1.33E-132	0.8999670646	0.32	0.196	7.51E-128	Lymphatic
NID11	4.72E-131	0.5821478784	0.442	0.299	2.67E-126	Lymphatic
PSME2	1.62E-126	0.6086881905	0.624	0.532	9.19E-122	Lymphatic
CHMP1B	1.63E-126	0.9093522543	0.439	0.309	9.22E-122	Lymphatic
SRSF6	5.23E-126	0.7921380549	0.333	0.207	2.96E-121	Lymphatic
RNASEH2C	7.00E-126	0.6680618676	0.465	0.333	3.96E-121	Lymphatic
EIF3J	9.66E-126	0.6004258613	0.463	0.328	5.47E-121	Lymphatic
YPEL3	3.34E-125	0.7813471427	0.362	0.235	1.89E-120	Lymphatic
MYDGF	1.39E-122	0.6085016212	0.558	0.443	7.87E-118	Lymphatic
LGMN	2.56E-122	0.9069282272	0.387	0.27	1.45E-117	Lymphatic
PIEZO1	4.93E-120	1.021834433	0.362	0.241	2.79E-115	Lymphatic
RALBP1	1.81E-119	0.6295794995	0.452	0.322	1.03E-114	Lymphatic
SDHAF2	2.32E-118	0.7669494839	0.251	0.141	1.32E-113	Lymphatic
SNF8	4.92E-118	0.6712907495	0.357	0.231	2.78E-113	Lymphatic
ZNF521	1.17E-117	1.009429856	0.334	0.216	6.63E-113	Lymphatic
LGALS9	1.41E-117	0.7127175585	0.47	0.348	8.01E-113	Lymphatic
COPS6	1.82E-117	0.6522474174	0.469	0.349	1.03E-112	Lymphatic
ORMDL1	1.92E-117	0.7592098877	0.37	0.243	1.09E-112	Lymphatic
SNRPB2	4.78E-117	0.546581002	0.535	0.413	2.71E-112	Lymphatic
DCTPP1	5.18E-117	0.7714537207	0.324	0.206	2.93E-112	Lymphatic
OLFML2A1	6.59E-116	0.9461691881	0.305	0.191	3.73E-111	Lymphatic
CORO1C	1.12E-115	0.8885151581	0.337	0.218	6.33E-111	Lymphatic
PDHB	2.42E-114	0.7966078693	0.333	0.216	1.37E-109	Lymphatic
WRB	3.52E-114	0.8582477508	0.272	0.162	1.99E-109	Lymphatic
BAX	6.03E-114	0.6205001158	0.523	0.406	3.42E-109	Lymphatic
HYAL2	1.29E-113	0.5489320187	0.735	0.659	7.33E-109	Lymphatic
CREM	6.74E-113	0.7339732439	0.395	0.278	3.82E-108	Lymphatic
PMVK	6.82E-113	0.8342863585	0.253	0.146	3.86E-108	Lymphatic
PERP1	6.83E-113	0.6142979258	0.331	0.204	3.87E-108	Lymphatic
PSENEN	1.91E-112	0.7049120033	0.405	0.282	1.08E-107	Lymphatic
NFAT5	2.84E-112	0.8766332955	0.428	0.309	1.61E-107	Lymphatic
TXNDC9	5.34E-112	0.7836226436	0.323	0.207	3.03E-107	Lymphatic
MORF4L2	3.72E-111	0.5488925763	0.528	0.417	2.10E-106	Lymphatic
RHOJ	2.05E-110	0.7761122635	0.49	0.372	1.16E-105	Lymphatic
AP2A2	3.13E-110	0.9763838399	0.302	0.191	1.77E-105	Lymphatic
AFAP1L11	6.13E-110	0.6886750331	0.376	0.251	3.47E-105	Lymphatic
COPE	1.43E-109	0.5201792655	0.567	0.465	8.08E-105	Lymphatic
POLR2F	6.24E-108	0.5851245301	0.486	0.369	3.53E-103	Lymphatic
LRPAP1	1.40E-107	0.6700556777	0.46	0.342	7.93E-103	Lymphatic
TMED9	1.66E-107	0.5339749752	0.591	0.494	9.38E-103	Lymphatic
SMAGP	5.23E-107	0.7620653234	0.357	0.242	2.96E-102	Lymphatic
BCAP31	5.28E-107	0.5226453764	0.66	0.582	2.99E-102	Lymphatic
EPS15	5.96E-107	0.9984933543	0.306	0.197	3.37E-102	Lymphatic
SPAG7	2.16E-106	0.7034832302	0.384	0.267	1.23E-101	Lymphatic
MRPL27	6.00E-106	0.6940387647	0.379	0.262	3.40E-101	Lymphatic
AGTRAP	1.82E-105	0.7589107369	0.356	0.242	1.03E-100	Lymphatic
GSDMD	5.42E-105	0.672172809	0.477	0.367	3.07E-100	Lymphatic
MINOS1	6.00E-105	0.5295085702	0.52	0.405	3.40E-100	Lymphatic
TCEAL4	8.18E-105	0.5257178105	0.574	0.46	4.63E-100	Lymphatic
CKLF	6.58E-104	0.5494991324	0.349	0.228	3.73E-99	Lymphatic
SCARB2	2.09E-103	0.6851773796	0.446	0.332	1.19E-98	Lymphatic
AP3S1	3.27E-103	0.651047135	0.424	0.307	1.85E-98	Lymphatic
SVIP	2.70E-102	0.6516480402	0.397	0.278	1.53E-97	Lymphatic
PFDN2	5.34E-102	0.5634460892	0.589	0.49	3.03E-97	Lymphatic
TSPAN4	5.89E-102	0.5693990741	0.576	0.471	3.33E-97	Lymphatic
ECHS1	1.27E-101	0.6376375123	0.4	0.286	7.18E-97	Lymphatic
ODF2L	1.35E-101	0.667296401	0.484	0.364	7.64E-97	Lymphatic
GTF2H5	1.58E-101	0.6429686427	0.398	0.28	8.96E-97	Lymphatic
PSMA1	1.21E-99	0.5137146093	0.544	0.435	6.83E-95	Lymphatic
11-9월	3.83E-98	0.8487967385	0.28	0.179	2.17E-93	Lymphatic
PSMB2	4.40E-98	0.5598713631	0.522	0.418	2.49E-93	Lymphatic
H2AFJ	5.81E-98	0.6314216772	0.434	0.317	3.29E-93	Lymphatic
BLCAP	6.83E-98	0.9169241344	0.272	0.171	3.87E-93	Lymphatic
NDUFA2	9.65E-98	0.5043852937	0.542	0.431	5.47E-93	Lymphatic
SS18L2	1.51E-97	0.8736386078	0.29	0.186	8.54E-93	Lymphatic
EIF5A	2.49E-97	0.701748735	0.576	0.505	1.41E-92	Lymphatic
GLRX5	4.57E-97	0.6708712116	0.293	0.185	2.59E-92	Lymphatic
UBE2J2	2.27E-96	0.7954007164	0.292	0.188	1.29E-91	Lymphatic
DYSF1	6.09E-96	0.5862907908	0.412	0.287	3.45E-91	Lymphatic
CTTN	7.31E-96	0.6133874768	0.491	0.38	4.14E-91	Lymphatic
TNFAIP8L11	9.71E-96	0.7019318443	0.33	0.218	5.50E-91	Lymphatic
SCCPDH	9.91E-96	0.8764217524	0.261	0.163	5.61E-91	Lymphatic
HSPB11	1.35E-95	0.800766144	0.305	0.2	7.65E-91	Lymphatic
MRPL15	2.79E-95	0.7829598026	0.297	0.193	1.58E-90	Lymphatic
CYC1	8.61E-95	0.6202723689	0.444	0.337	4.87E-90	Lymphatic
FKBP3	8.67E-95	0.6331734768	0.373	0.261	4.91E-90	Lymphatic
F2RL31	8.90E-95	0.5080462155	0.321	0.205	5.04E-90	Lymphatic
NIFK	9.54E-94	0.87021921	0.306	0.203	5.40E-89	Lymphatic
CHST12	1.48E-93	0.7079595963	0.374	0.264	8.37E-89	Lymphatic
TNXB	2.91E-93	1.264152365	0.311	0.215	1.65E-88	Lymphatic
ORMDL2	6.05E-93	0.6765042936	0.348	0.238	3.42E-88	Lymphatic
ISG151	6.18E-93	1.233775011	0.576	0.505	3.50E-88	Lymphatic
FAM3C	7.32E-93	0.6766728282	0.382	0.271	4.14E-88	Lymphatic
MRPL50	8.00E-93	0.6412704332	0.299	0.194	4.53E-88	Lymphatic
TNFRSF14	1.78E-92	0.6890903548	0.394	0.283	1.01E-87	Lymphatic
BUD31	2.34E-92	0.5614440574	0.496	0.389	1.33E-87	Lymphatic
RNF181	1.46E-91	0.5266486734	0.527	0.424	8.28E-87	Lymphatic
UBE2L6	2.14E-91	0.6740600093	0.427	0.324	1.21E-86	Lymphatic
TMEM208	5.02E-91	0.6640980571	0.382	0.273	2.84E-86	Lymphatic
TOR1AIP2	5.65E-91	0.7408735887	0.296	0.192	3.20E-86	Lymphatic
TXNL4A	1.05E-90	0.6028322694	0.351	0.242	5.96E-86	Lymphatic
NXN	3.98E-88	1.010808874	0.275	0.18	2.25E-83	Lymphatic
SLC38A2	5.20E-87	0.5337613468	0.664	0.553	2.94E-82	Lymphatic
ARF6	6.89E-87	0.5320124588	0.425	0.315	3.90E-82	Lymphatic
GFM1	1.18E-86	0.8235944095	0.267	0.171	6.66E-82	Lymphatic
POR	3.31E-86	0.8283687763	0.252	0.158	1.88E-81	Lymphatic
DDX1	3.35E-86	0.6211260674	0.312	0.208	1.89E-81	Lymphatic
HSD17B10	3.41E-86	0.6411573473	0.382	0.279	1.93E-81	Lymphatic
COPRS	6.29E-85	0.7601591705	0.259	0.163	3.56E-80	Lymphatic
BABAM1	2.24E-84	0.640109396	0.264	0.167	1.27E-79	Lymphatic
UGP2	2.99E-84	1.039081251	0.374	0.277	1.70E-79	Lymphatic
MRPL57	3.06E-84	0.5576277828	0.452	0.347	1.73E-79	Lymphatic
VMP1	1.23E-83	0.5966173235	0.589	0.484	6.96E-79	Lymphatic
IDH21	1.23E-83	0.5768186421	0.293	0.192	6.98E-79	Lymphatic
TMEM126B	1.15E-82	0.6801413266	0.302	0.202	6.50E-78	Lymphatic
MRPS18C	1.62E-82	0.5931705211	0.376	0.273	9.19E-78	Lymphatic
TGIF1	1.70E-82	0.7038979789	0.325	0.224	9.64E-78	Lymphatic
UBE2E1	9.36E-82	0.6992930542	0.328	0.228	5.30E-77	Lymphatic
ZNF706	2.29E-81	0.5537047401	0.554	0.462	1.30E-76	Lymphatic
LAMTOR2	3.16E-81	0.5010377115	0.507	0.412	1.79E-76	Lymphatic
PHYKPL	5.46E-81	0.8368931686	0.269	0.175	3.09E-76	Lymphatic
SLC43A3	3.30E-80	0.8528088742	0.268	0.176	1.87E-75	Lymphatic
UBXN6	9.40E-80	0.6351297203	0.263	0.168	5.32E-75	Lymphatic
APOL32	1.70E-79	0.5145423801	0.308	0.205	9.63E-75	Lymphatic
ETFB	1.80E-79	0.5462909758	0.414	0.31	1.02E-74	Lymphatic
DIMT1	2.80E-79	0.8058372622	0.255	0.164	1.59E-74	Lymphatic
SIN3B	5.16E-79	0.8996055	0.253	0.163	2.92E-74	Lymphatic
MFSD10	1.18E-78	0.645682066	0.373	0.272	6.65E-74	Lymphatic
ARID5B	1.76E-78	0.5598324526	0.528	0.429	9.95E-74	Lymphatic
DPM1	3.99E-78	0.6669130428	0.301	0.206	2.26E-73	Lymphatic
STOML2	4.78E-78	0.5969368038	0.394	0.296	2.71E-73	Lymphatic
TRAPPC3	6.59E-78	0.55476034	0.39	0.29	3.73E-73	Lymphatic
CDC42SE2	6.61E-77	0.6680625917	0.286	0.191	3.74E-72	Lymphatic
EIF6	9.28E-77	0.5788724631	0.455	0.361	5.26E-72	Lymphatic
SMIM12	9.53E-77	0.5942399649	0.327	0.229	5.40E-72	Lymphatic
BEX4	1.68E-76	0.7344943327	0.255	0.167	9.50E-72	Lymphatic
TBPL1	2.36E-76	0.7012815063	0.275	0.183	1.34E-71	Lymphatic
SNRPN	3.67E-76	0.6638403539	0.313	0.215	2.08E-71	Lymphatic
MRPS12	3.89E-76	0.5731218705	0.338	0.239	2.20E-71	Lymphatic
TECR	8.38E-75	0.5798222693	0.42	0.32	4.75E-70	Lymphatic
TMX2	3.02E-74	0.6400971087	0.262	0.172	1.71E-69	Lymphatic
COX20	6.81E-74	0.588416498	0.348	0.25	3.86E-69	Lymphatic
EMC6	1.14E-73	0.5748715579	0.354	0.257	6.46E-69	Lymphatic
TNIP2	3.24E-73	0.6534954953	0.35	0.256	1.83E-68	Lymphatic
ATF6	3.88E-73	0.6610078836	0.322	0.226	2.20E-68	Lymphatic
HDAC2	1.02E-72	0.5733048792	0.396	0.3	5.78E-68	Lymphatic
TSPAN151	2.40E-72	0.5639541999	0.33	0.232	1.36E-67	Lymphatic
CDV3	2.81E-72	0.6101822694	0.374	0.276	1.59E-67	Lymphatic
HOXD8	3.95E-72	0.6695904691	0.331	0.237	2.24E-67	Lymphatic
MTCH2	1.36E-71	0.6529305352	0.307	0.215	7.68E-67	Lymphatic
STAB1	1.88E-71	0.7090439282	0.436	0.34	1.07E-66	Lymphatic
IFRD2	2.15E-71	0.7371069413	0.261	0.173	1.22E-66	Lymphatic
TMEM255B	9.11E-71	0.5017238461	0.541	0.453	5.16E-66	Lymphatic
RNF51	2.42E-70	0.6282971431	0.339	0.246	1.37E-65	Lymphatic
GAS62	8.56E-70	0.5472226446	0.4	0.298	4.85E-65	Lymphatic
MRPL47	8.80E-70	0.5840295045	0.34	0.246	4.98E-65	Lymphatic
RCN2	2.97E-69	0.5012026379	0.447	0.354	1.68E-64	Lymphatic
EHD2	2.53E-68	0.547875215	0.482	0.394	1.43E-63	Lymphatic
MRPL13	3.40E-68	0.5679885015	0.324	0.232	1.93E-63	Lymphatic
TTC14	3.82E-68	0.7454781545	0.28	0.192	2.16E-63	Lymphatic
A4GALT	4.62E-68	0.5925340904	0.358	0.264	2.62E-63	Lymphatic
UNC50	7.05E-68	0.6326446864	0.29	0.201	3.99E-63	Lymphatic
TPD52L2	1.94E-66	0.6891385044	0.296	0.209	1.10E-61	Lymphatic
TEX264	3.55E-66	0.5522671747	0.42	0.33	2.01E-61	Lymphatic
NMT1	7.91E-66	0.5594144623	0.267	0.179	4.48E-61	Lymphatic
TMED1	1.70E-65	0.629603488	0.253	0.17	9.61E-61	Lymphatic
TTC1	1.92E-65	0.5520848421	0.315	0.225	1.09E-60	Lymphatic
PIGT	2.92E-65	0.5938130199	0.375	0.284	1.65E-60	Lymphatic
STARD7	3.35E-65	0.6857514353	0.328	0.238	1.89E-60	Lymphatic
DDA1	4.69E-65	0.6474594088	0.27	0.184	2.66E-60	Lymphatic
IER3IP1	9.95E-65	0.5533827822	0.413	0.321	5.64E-60	Lymphatic
PPP2R5C	1.41E-64	0.5848326188	0.289	0.202	7.98E-60	Lymphatic
TP53I3	2.53E-64	0.7099711027	0.278	0.193	1.44E-59	Lymphatic
TM2D2	1.13E-63	0.5596227308	0.298	0.21	6.38E-59	Lymphatic
PAIP1	2.01E-63	0.5266535375	0.366	0.276	1.14E-58	Lymphatic
MRPL21	2.62E-63	0.5794529815	0.313	0.226	1.48E-58	Lymphatic
ITPA	5.00E-63	0.6682480032	0.267	0.184	2.83E-58	Lymphatic
UQCC3	1.05E-62	0.725126342	0.255	0.173	5.95E-58	Lymphatic
TRIAP1	2.25E-62	0.5665898426	0.25	0.169	1.28E-57	Lymphatic
MRPL22	2.01E-61	0.5491165605	0.341	0.253	1.14E-56	Lymphatic
TM2D1	2.34E-61	0.5027311534	0.352	0.261	1.33E-56	Lymphatic
WTAP	5.33E-61	0.703901569	0.4	0.314	3.02E-56	Lymphatic
EIF4EBP11	7.54E-61	0.5645786403	0.326	0.238	4.27E-56	Lymphatic
BID1	6.20E-60	0.5617759889	0.315	0.228	3.51E-55	Lymphatic
SNRNP27	7.15E-60	0.6477835081	0.264	0.182	4.05E-55	Lymphatic
IFI61	7.86E-60	0.8438516055	0.585	0.551	4.45E-55	Lymphatic
KANSL1	1.04E-59	0.6449161627	0.287	0.202	5.91E-55	Lymphatic
CHMP4B	1.47E-58	0.5914583206	0.389	0.302	8.31E-54	Lymphatic
GUSB	2.35E-58	0.6994955176	0.299	0.217	1.33E-53	Lymphatic
NDUFV3	2.86E-58	0.5534708014	0.251	0.171	1.62E-53	Lymphatic
NT5C3B	3.92E-58	0.6894875044	0.258	0.179	2.22E-53	Lymphatic
CCDC25	1.24E-57	0.6094550643	0.344	0.26	7.01E-53	Lymphatic
DBN11	4.17E-57	0.5243975101	0.362	0.273	2.36E-52	Lymphatic
MAP2K2	5.70E-57	0.519895195	0.297	0.212	3.23E-52	Lymphatic
PPP1R7	3.25E-56	0.5585921625	0.311	0.23	1.84E-51	Lymphatic
RHBDD2	4.00E-56	0.6098960173	0.275	0.195	2.26E-51	Lymphatic
PROCR	5.26E-56	0.7941463274	0.318	0.241	2.98E-51	Lymphatic
MRPL42	1.15E-55	0.5302216323	0.311	0.227	6.50E-51	Lymphatic
MDH1	3.29E-55	0.591105019	0.302	0.222	1.86E-50	Lymphatic
CLCN3	2.22E-54	0.5790291468	0.253	0.175	1.26E-49	Lymphatic
MRPS14	2.82E-54	0.5528529457	0.259	0.182	1.60E-49	Lymphatic
BORCS7	5.59E-54	0.6564038152	0.345	0.264	3.16E-49	Lymphatic
SMIM19	1.25E-53	0.5838127794	0.254	0.177	7.07E-49	Lymphatic
FRG1	1.51E-53	0.5133398099	0.311	0.229	8.57E-49	Lymphatic
NTMT1	1.33E-52	0.6710658685	0.267	0.191	7.50E-48	Lymphatic
PSMA3-AS1	1.80E-52	0.6830980848	0.275	0.199	1.02E-47	Lymphatic
H1F0	2.09E-52	0.5607666469	0.307	0.226	1.19E-47	Lymphatic
RAB8A	3.82E-52	0.5144460876	0.267	0.19	2.16E-47	Lymphatic
CNTNAP3B	2.41E-51	0.6551914216	0.256	0.181	1.36E-46	Lymphatic
PPHLN1	4.65E-51	0.5662896076	0.287	0.209	2.63E-46	Lymphatic
TSG101	7.19E-51	0.5097233643	0.316	0.237	4.07E-46	Lymphatic
UHRF2	7.21E-51	0.7533534076	0.253	0.178	4.08E-46	Lymphatic
LASP1	1.43E-50	0.5715324478	0.326	0.248	8.08E-46	Lymphatic
TPGS2	4.51E-50	0.5908102015	0.256	0.182	2.55E-45	Lymphatic
JAGN1	4.32E-49	0.5250268184	0.252	0.178	2.45E-44	Lymphatic
NPEPPS	7.04E-49	0.7270240104	0.294	0.219	3.98E-44	Lymphatic
MAP4K5	9.70E-49	0.7506430867	0.258	0.187	5.49E-44	Lymphatic
IFT57	1.54E-48	0.6501992879	0.263	0.191	8.69E-44	Lymphatic
BLVRB	2.43E-47	0.5901548037	0.27	0.198	1.37E-42	Lymphatic
PABPN1	1.24E-46	0.53815569	0.402	0.324	7.04E-42	Lymphatic
TM2D3	1.44E-46	0.5363634172	0.296	0.221	8.14E-42	Lymphatic
ATP11A1	1.61E-46	0.6401925089	0.25	0.181	9.10E-42	Lymphatic
DAZAP1	2.83E-46	0.5912419078	0.283	0.21	1.60E-41	Lymphatic
VBP1	5.37E-46	0.5035697637	0.274	0.201	3.04E-41	Lymphatic
DERL2	8.75E-46	0.5647260356	0.255	0.183	4.95E-41	Lymphatic
NUDT16	4.79E-45	0.5431628537	0.253	0.182	2.71E-40	Lymphatic
FDX1	1.03E-44	0.6013389084	0.255	0.185	5.83E-40	Lymphatic
SYNE1	2.05E-44	0.7635432226	0.252	0.185	1.16E-39	Lymphatic
SMARCB1	2.95E-44	0.5278727702	0.313	0.241	1.67E-39	Lymphatic
CYB5B	9.27E-44	0.5369307366	0.351	0.277	5.25E-39	Lymphatic
MRPL37	1.75E-43	0.5606514516	0.253	0.184	9.93E-39	Lymphatic
SPNS1	4.43E-43	0.5053502792	0.251	0.181	2.51E-38	Lymphatic
ERCC1	3.30E-42	0.5723846809	0.261	0.193	1.87E-37	Lymphatic
IARS2	5.95E-42	0.6267767071	0.265	0.198	3.37E-37	Lymphatic
MRPL40	1.18E-39	0.5200088904	0.277	0.209	6.68E-35	Lymphatic
ATXN3	1.42E-39	0.5202019615	0.323	0.252	8.05E-35	Lymphatic
DPM2	1.10E-38	0.529581433	0.275	0.209	6.22E-34	Lymphatic
NUDT41	2.89E-38	0.7000320532	0.305	0.24	1.64E-33	Lymphatic
EBNA1BP2	1.03E-36	0.5204711946	0.28	0.217	5.85E-32	Lymphatic
MMP141	4.96E-36	0.655760789	0.321	0.257	2.81E-31	Lymphatic
SFXN3	1.66E-35	0.6761755334	0.25	0.189	9.37E-31	Lymphatic
CXCL21	9.90E-35	0.8023669756	0.356	0.292	5.61E-30	Lymphatic
ACOT9	1.64E-33	0.552171908	0.266	0.205	9.27E-29	Lymphatic
SDCCAG8	3.99E-31	0.5771382123	0.259	0.202	2.26E-26	Lymphatic
THUMPD3-AS1	2.75E-29	0.6092372705	0.271	0.214	1.56E-24	Lymphatic
C19orf66	1.11E-28	0.5237669763	0.295	0.239	6.30E-24	Lymphatic
SNCG1	1.62E-26	0.7047574788	0.451	0.414	9.18E-22	Lymphatic
MDM4	8.75E-26	0.5343390858	0.259	0.206	4.95E-21	Lymphatic
LMO2	3.71E-23	0.6145180042	0.412	0.366	2.10E-18	Lymphatic
ALDH2	1.18E-17	0.6317376219	0.254	0.217	6.66E-13	Lymphatic
TYMS	0	5.608288185	0.699	0.031	0	Proliferation
TK1	0	5.631934496	0.669	0.023	0	Proliferation
PTTG1	0	5.136064994	0.663	0.051	0	Proliferation
CENPF	0	6.214223157	0.623	0.021	0	Proliferation
GGH	0	3.715897693	0.642	0.071	0	Proliferation
NUSAP1	0	6.599231778	0.575	0.01	0	Proliferation
BIRC5	0	6.381771231	0.569	0.009	0	Proliferation
CKS1B	0	3.096858564	0.687	0.136	0	Proliferation
SMC4	0	2.566276976	0.694	0.163	0	Proliferation
CENPW	0	3.958690263	0.571	0.047	0	Proliferation
MKI67	0	7.475911258	0.528	0.005	0	Proliferation
HMGB2	0	2.688166415	0.772	0.259	0	Proliferation
UBE2C	0	6.708841477	0.514	0.007	0	Proliferation
ZWINT	0	5.13697302	0.524	0.019	0	Proliferation
DTYMK	0	2.550785298	0.66	0.157	0	Proliferation
TOP2A	0	6.81557799	0.5	0.009	0	Proliferation
STMN12	0	2.239045872	0.93	0.465	0	Proliferation
HMGB3	0	2.680426704	0.559	0.114	0	Proliferation
CDKN3	0	2.841682079	0.53	0.087	0	Proliferation
PRC1	0	5.248309791	0.452	0.014	0	Proliferation
RRM2	0	8.345600644	0.437	0.003	0	Proliferation
PCNA	0	2.749551486	0.592	0.16	0	Proliferation
MAD2L1	0	4.95446626	0.446	0.015	0	Proliferation
RPA3	0	1.942930353	0.605	0.175	0	Proliferation
HMGN2	0	2.57960675	0.919	0.498	0	Proliferation
UBE2T	0	4.167392362	0.445	0.029	0	Proliferation
SKA2	0	2.072481826	0.553	0.139	0	Proliferation
CDC20	0	6.167450248	0.422	0.008	0	Proliferation
CENPK	0	4.092625556	0.44	0.026	0	Proliferation
SMC2	0	2.374182247	0.524	0.111	0	Proliferation
DHFR	0	3.982468023	0.446	0.035	0	Proliferation
TPX2	0	6.829364223	0.415	0.005	0	Proliferation
CDK1	0	4.646431989	0.433	0.028	0	Proliferation
GTSE1	0	6.807612916	0.409	0.004	0	Proliferation
PHF19	0	3.684870613	0.438	0.038	0	Proliferation
DNAJC9	0	2.378639562	0.501	0.104	0	Proliferation
LMNB1	0	3.184034522	0.443	0.052	0	Proliferation
MCM7	0	2.04626772	0.51	0.126	0	Proliferation
CKAP2	0	3.36265088	0.436	0.053	0	Proliferation
CCNB1	0	5.366830753	0.397	0.017	0	Proliferation
WDR34	0	2.134249094	0.488	0.109	0	Proliferation
PBK	0	6.983119053	0.38	0.002	0	Proliferation
CENPM	0	6.190167513	0.381	0.005	0	Proliferation
CCNB2	0	6.707981256	0.38	0.005	0	Proliferation
FOXM1	0	5.982636782	0.378	0.006	0	Proliferation
RRM1	0	2.527206525	0.451	0.083	0	Proliferation
CLSPN	0	5.161639684	0.376	0.01	0	Proliferation
ASPM	0	7.491119038	0.364	0.003	0	Proliferation
CENPU	0	5.192429753	0.371	0.011	0	Proliferation
KIF22	0	2.133943353	0.455	0.096	0	Proliferation
HELLS	0	3.503450104	0.392	0.039	0	Proliferation
DLGAP5	0	7.829567403	0.355	0.002	0	Proliferation
CENPN	0	3.797045074	0.379	0.027	0	Proliferation
CEP55	0	7.553152342	0.353	0.002	0	Proliferation
TACC3	0	3.702192099	0.377	0.027	0	Proliferation
KIF20B	0	3.681045647	0.367	0.03	0	Proliferation
CCDC34	0	2.97771433	0.374	0.043	0	Proliferation
PCLAF	0	5.446094562	0.342	0.012	0	Proliferation
NUDT1	0	2.459593913	0.383	0.055	0	Proliferation
RAD51AP1	0	4.874594755	0.338	0.01	0	Proliferation
ANLN	0	6.667742616	0.33	0.003	0	Proliferation
HMMR	0	7.094352562	0.329	0.002	0	Proliferation
CENPH	0	3.520156734	0.356	0.029	0	Proliferation
CCNA2	0	6.144925379	0.329	0.003	0	Proliferation
MCM5	0	2.664393821	0.39	0.067	0	Proliferation
LGALS12	0	1.992205147	0.978	0.655	0	Proliferation
AURKB	0	6.889052756	0.323	0.002	0	Proliferation
CENPE	0	5.528576228	0.33	0.01	0	Proliferation
[truncated: 693 more rows]
