# Supplementary material for: Transcriptional heterogeneity of tumor-associated high endothelial venules defines inflammatory and stress-metabolic states with distinct prognostic associations
Source: Discov Oncol. 2026 May 8;17:964. doi: 10.1007/s12672-026-05162-2 (PMC13323434; doi:10.1007/s12672-026-05162-2)
Supplement: Supplementary file 9 — Supplementary Material 9. [file 12672_2026_5162_MOESM9_ESM.xlsx]

## Sheet: Table S4
Table S2: Differentially expressed genes for each venous endothelial subcluster (clusters 0–19)
gene	p_val	avg_log2FC	pct.1	pct.2	p_val_adj	cluster
HLA-DQA1	0	1.081969255	0.784	0.328	0	0
IL33	0	0.8328678941	0.838	0.392	0	0
RND1	0	1.39741836	0.767	0.329	0	0
SOD2	0	1.630344594	0.909	0.472	0	0
IL6	0	2.461174096	0.631	0.197	0	0
CLU	0	0.7272196819	0.929	0.499	0	0
CNKSR3	0	1.20394365	0.719	0.289	0	0
MAT2A	0	1.429687821	0.711	0.283	0	0
CEBPD	0	1.200909476	0.829	0.401	0	0
TFPI	0	0.9659134828	0.825	0.403	0	0
CCL14	0	1.033302679	0.89	0.47	0	0
UGCG	0	1.071883881	0.828	0.408	0	0
ZNF385D	0	1.086157911	0.869	0.452	0	0
RCAN1	0	1.733131281	0.821	0.409	0	0
HLA-DQB1	0	0.9030776675	0.837	0.426	0	0
TMEM70	0	1.489905517	0.678	0.268	0	0
ARID5A	0	1.304866589	0.637	0.228	0	0
CDKN1A	0	1.552124323	0.971	0.564	0	0
PHLDA1	0	1.147106087	0.747	0.34	0	0
IRF1	0	0.8936988024	0.877	0.482	0	0
EVA1C	0	1.095130842	0.709	0.314	0	0
ARID5B	0	1.105093366	0.803	0.413	0	0
SLC25A25	0	1.241860905	0.61	0.22	0	0
PNP	0	1.160018125	0.813	0.425	0	0
SOCS2	0	1.043022871	0.691	0.303	0	0
ADM5	0	1.444652207	0.6	0.213	0	0
MYC	0	1.182523407	0.702	0.319	0	0
KDM6B	0	1.028391482	0.662	0.28	0	0
TESC	0	1.344039244	0.57	0.191	0	0
SOX17	0	1.736521633	0.641	0.265	0	0
ADAMTS9	0	1.17932845	0.781	0.406	0	0
ADAMTS4	0	1.793906826	0.595	0.238	0	0
ICAM1	0	1.316423069	0.942	0.585	0	0
ITPKC	0	1.404738386	0.531	0.176	0	0
ZC3H12A	0	1.259599409	0.556	0.203	0	0
CSF3	0	2.365738091	0.469	0.121	0	0
FOSL1	0	1.778591709	0.445	0.12	0	0
ADRB2	0	1.642760296	0.425	0.115	0	0
C1QTNF1	0	1.356561997	0.437	0.131	0	0
EMP1	0	1.281072211	0.959	0.667	0	0
NFKBID	0	1.573087703	0.389	0.106	0	0
SOCS3	0	0.8694726034	0.97	0.692	0	0
HLA-DRA	0	0.7769126376	0.991	0.735	0	0
LRG1	0	1.655422492	0.342	0.088	0	0
NFKBIA	0	1.166472961	0.993	0.772	0	0
TM4SF1	0	1.277395167	0.986	0.776	0	0
EEF1A1	0	0.5846935236	1	0.973	0	0
ACKR1	1.98E-307	0.878880494	0.942	0.708	1.12E-302	0
ATP1A1	6.06E-307	0.8802710352	0.913	0.54	3.43E-302	0
SERPING1	1.28E-304	0.8953143692	0.789	0.378	7.25E-300	0
GJA1	1.18E-303	1.276426497	0.788	0.413	6.66E-299	0
CSRNP1	7.15E-300	0.8165938044	0.765	0.36	4.05E-295	0
SERTAD1	1.16E-298	0.7979612818	0.889	0.48	6.59E-294	0
SDCBP	5.22E-298	0.7879231444	0.951	0.635	2.96E-293	0
TRIB1	4.27E-296	1.071541123	0.643	0.28	2.42E-291	0
ETS2	9.98E-296	0.8399812044	0.947	0.645	5.65E-291	0
NAMPT	2.96E-294	0.9244598663	0.883	0.508	1.67E-289	0
MAFF	2.83E-293	0.8110976917	0.72	0.325	1.60E-288	0
ARL5B	1.65E-290	1.202587446	0.546	0.218	9.33E-286	0
NFKBIZ	1.30E-289	0.8379727798	0.874	0.485	7.34E-285	0
C2CD4B	3.84E-288	1.208056143	0.65	0.294	2.17E-283	0
CTSC	1.05E-287	0.8869921268	0.793	0.405	5.95E-283	0
CDC42EP3	3.27E-284	0.8555895477	0.848	0.467	1.85E-279	0
RBKS	5.86E-284	1.892068508	0.358	0.107	3.32E-279	0
TIFA	5.04E-282	1.142843099	0.485	0.175	2.85E-277	0
EGLN3	2.54E-281	1.525915697	0.334	0.092	1.44E-276	0
CD74	5.50E-280	0.7543466024	0.999	0.899	3.12E-275	0
SCARB1	1.30E-278	1.013764387	0.451	0.153	7.34E-274	0
ELOVL7	2.87E-278	1.139421129	0.441	0.147	1.63E-273	0
NRN1	2.31E-276	0.8672716211	0.722	0.347	1.31E-271	0
CCL23	7.70E-276	1.335566255	0.429	0.142	4.36E-271	0
MIR222HG	3.29E-271	1.214257033	0.412	0.135	1.86E-266	0
INSIG1	1.10E-270	1.03774812	0.656	0.295	6.26E-266	0
SLCO4A1	4.84E-270	1.371040014	0.325	0.09	2.74E-265	0
PDLIM1	7.42E-270	0.7829255561	0.977	0.724	4.20E-265	0
HLA-DPA1	1.82E-269	0.7393102045	0.973	0.646	1.03E-264	0
NCOA7	3.25E-265	0.9622628718	0.899	0.547	1.84E-260	0
REL	1.62E-264	0.9909522292	0.615	0.273	9.18E-260	0
FAM13C	1.84E-261	1.006904884	0.409	0.134	1.04E-256	0
TNFAIP3	1.04E-258	1.243263773	0.723	0.374	5.89E-254	0
LPCAT4	1.20E-254	0.8589701056	0.584	0.245	6.79E-250	0
HLA-DPB1	1.35E-254	0.7339221508	0.951	0.613	7.62E-250	0
LRRC32	4.52E-252	0.9336936055	0.534	0.216	2.56E-247	0
BTG2	1.60E-250	0.7005065895	0.798	0.418	9.09E-246	0
SERPINB1	1.82E-250	0.9285146197	0.703	0.346	1.03E-245	0
MAP3K8	4.72E-250	0.8083182882	0.719	0.349	2.67E-245	0
HLA-DMA	3.41E-249	0.688311047	0.848	0.457	1.93E-244	0
PCDH19	3.33E-248	1.358836953	0.286	0.075	1.88E-243	0
MIR22HG	8.29E-248	0.8669970046	0.534	0.217	4.69E-243	0
LINC-PINT	5.44E-247	0.9968025825	0.524	0.211	3.08E-242	0
LIFR	1.47E-246	0.6311008202	0.71	0.33	8.34E-242	0
RALGDS	1.52E-245	0.9314477833	0.632	0.295	8.63E-241	0
CYGB	9.62E-245	1.126178145	0.304	0.084	5.45E-240	0
TIPARP	3.32E-244	1.010602717	0.437	0.158	1.88E-239	0
LGALS3	1.18E-243	0.6854803276	0.934	0.62	6.68E-239	0
TACR1	5.71E-243	1.02034345	0.392	0.13	3.24E-238	0
NOLC1	2.04E-242	1.065245714	0.468	0.18	1.15E-237	0
NFE2L2	6.25E-241	0.7484267861	0.764	0.403	3.54E-236	0
ZFP36	1.48E-240	0.8620892369	0.983	0.789	8.37E-236	0
NR4A2	5.23E-240	1.17709063	0.589	0.271	2.96E-235	0
CSRP2	8.47E-240	0.9717547876	0.731	0.38	4.80E-235	0
ATF3	1.16E-239	0.7303945827	0.798	0.419	6.59E-235	0
SLC2A3	2.95E-239	0.7204407207	0.947	0.639	1.67E-234	0
DNAJA1	1.21E-238	0.6754244084	0.959	0.671	6.87E-234	0
NNMT	2.87E-238	0.7641447092	0.939	0.622	1.63E-233	0
IL1R1	8.30E-236	0.8886019577	0.661	0.312	4.70E-231	0
BAG3	3.50E-234	0.6457943526	0.777	0.399	1.98E-229	0
LUCAT1	4.43E-234	2.03414211	0.165	0.028	2.51E-229	0
ZFAND5	8.10E-232	0.7241194372	0.875	0.532	4.59E-227	0
SELE	1.18E-230	1.282631862	0.825	0.512	6.67E-226	0
SLC1A5	5.31E-230	0.9350840064	0.456	0.175	3.01E-225	0
AKAP12	4.09E-228	1.117004349	0.369	0.124	2.32E-223	0
OLFM1	1.63E-227	0.8688832441	0.637	0.299	9.25E-223	0
ZNF267	7.68E-227	1.037763803	0.485	0.198	4.35E-222	0
IER3	3.76E-226	1.098307708	0.875	0.577	2.13E-221	0
CCL2	6.30E-225	1.310601114	0.624	0.308	3.57E-220	0
CHD1	2.02E-224	0.8123202895	0.644	0.312	1.15E-219	0
LMCD1	2.19E-224	0.7440529012	0.838	0.488	1.24E-219	0
BIRC3	3.58E-224	1.30151516	0.511	0.221	2.03E-219	0
HLA-DRB5	4.22E-224	0.7883403259	0.881	0.529	2.39E-219	0
YBX3	3.93E-223	0.6815900752	0.942	0.644	2.22E-218	0
TGFBR3	2.29E-221	0.6043123438	0.702	0.338	1.30E-216	0
HNRNPF	3.20E-219	0.6403996213	0.814	0.448	1.81E-214	0
PLSCR1	3.37E-219	0.719228754	0.847	0.502	1.91E-214	0
CYTL1	5.86E-219	0.9752865921	0.438	0.166	3.32E-214	0
HLA-DRB1	5.01E-217	0.6201344352	0.977	0.771	2.84E-212	0
BACE2	4.28E-216	0.8143642494	0.786	0.445	2.42E-211	0
C7	1.23E-214	0.9603609975	0.409	0.15	6.96E-210	0
KCTD12	1.42E-214	0.814539957	0.739	0.388	8.07E-210	0
FAM107A	1.64E-211	0.9035130009	0.481	0.199	9.26E-207	0
PABPC1	3.75E-211	0.5915646276	0.97	0.725	2.12E-206	0
TPD52L1	6.92E-208	0.732421595	0.57	0.256	3.92E-203	0
APOLD1	1.01E-206	0.6590380879	0.659	0.328	5.73E-202	0
RPLP0	2.94E-206	0.5622877251	0.996	0.867	1.66E-201	0
STX11	2.37E-204	1.360204322	0.226	0.057	1.34E-199	0
GTF2B	1.71E-203	0.9144084323	0.436	0.172	9.70E-199	0
XBP1	5.98E-201	0.650482965	0.635	0.31	3.39E-196	0
RNF122	1.41E-198	1.026006718	0.293	0.092	8.00E-194	0
PNRC2	3.48E-198	0.7319985841	0.626	0.312	1.97E-193	0
PLSCR4	2.93E-197	0.7425206895	0.442	0.175	1.66E-192	0
MCTP1	3.26E-197	0.6512989498	0.802	0.464	1.85E-192	0
DDX21	3.63E-197	0.6457208778	0.764	0.428	2.06E-192	0
TSPAN7	3.97E-197	0.5956336543	0.865	0.502	2.25E-192	0
RHOU	1.05E-196	0.8748417647	0.371	0.135	5.96E-192	0
KIAA0040	6.10E-194	1.045389393	0.356	0.128	3.45E-189	0
CD55	7.76E-194	0.7249119367	0.719	0.384	4.39E-189	0
NEDD9	4.16E-192	0.5898919853	0.822	0.471	2.36E-187	0
LDHA	5.62E-192	0.5781999913	0.967	0.684	3.18E-187	0
PNPLA2	1.50E-191	0.7021874612	0.585	0.28	8.52E-187	0
EGR3	1.76E-190	0.823987348	0.349	0.123	9.96E-186	0
EEF1B2	1.77E-190	0.5477374089	0.971	0.737	1.00E-185	0
CLDN5	2.03E-190	0.6015211147	0.868	0.545	1.15E-185	0
ADAMTS1	3.47E-190	1.200042743	0.697	0.4	1.97E-185	0
COQ10B	1.17E-189	0.6574088285	0.503	0.219	6.64E-185	0
PPP1R15A	1.94E-189	0.5337319928	0.967	0.658	1.10E-184	0
PDIA5	3.58E-189	0.7676286046	0.483	0.207	2.03E-184	0
ELF1	2.52E-188	0.6177932797	0.713	0.385	1.43E-183	0
TNFRSF10B	1.85E-187	0.6807182964	0.566	0.265	1.05E-182	0
DNTTIP2	3.12E-187	0.7966130196	0.482	0.212	1.77E-182	0
CHIC2	4.79E-186	0.7236988115	0.601	0.294	2.71E-181	0
CBLB	7.39E-185	0.7620070531	0.487	0.214	4.18E-180	0
SEMA6A	2.14E-183	0.7027039979	0.498	0.218	1.21E-178	0
AMD1	5.37E-183	0.6229592174	0.518	0.235	3.04E-178	0
DLC1	2.43E-182	0.7367902259	0.734	0.414	1.38E-177	0
UBE2D3	2.52E-182	0.5288095184	0.929	0.611	1.43E-177	0
MET	8.41E-182	0.7837023174	0.424	0.172	4.76E-177	0
EGR1	1.69E-181	0.7509674452	0.787	0.463	9.59E-177	0
IGFBP2	6.71E-181	0.6231540757	0.463	0.193	3.80E-176	0
CYSTM1	7.78E-180	0.5168530772	0.675	0.35	4.41E-175	0
LRRC1	9.52E-180	0.6818184933	0.451	0.188	5.39E-175	0
TUBB4B	1.38E-178	0.574746857	0.817	0.476	7.82E-174	0
FNIP2	4.13E-178	0.6535876168	0.521	0.238	2.34E-173	0
EPS8	1.74E-177	0.6162578265	0.535	0.247	9.84E-173	0
FOSL2	2.26E-177	0.510766567	0.766	0.428	1.28E-172	0
HOPX	1.11E-175	1.255051493	0.194	0.049	6.26E-171	0
RAB5A	4.22E-174	0.5488872755	0.577	0.279	2.39E-169	0
CBR3	5.10E-174	1.146020663	0.288	0.097	2.89E-169	0
NXT1	1.55E-172	0.6577481161	0.504	0.23	8.80E-168	0
SYBU	5.02E-172	1.046551546	0.269	0.087	2.85E-167	0
NFATC2	7.82E-172	0.9774033218	0.412	0.173	4.43E-167	0
RALGAPA2	4.63E-171	0.5633559231	0.633	0.321	2.62E-166	0
ANKRD29	1.80E-170	0.5586002922	0.421	0.172	1.02E-165	0
TAP1	2.28E-170	0.5645350169	0.669	0.352	1.29E-165	0
TOP1	3.37E-170	0.6229927668	0.69	0.378	1.91E-165	0
INPP1	8.49E-170	0.6124680964	0.613	0.311	4.81E-165	0
EIF3L	2.03E-169	0.595311814	0.787	0.459	1.15E-164	0
PERP	5.21E-169	0.6742965572	0.534	0.245	2.95E-164	0
CRTAP	7.93E-169	0.5805021946	0.719	0.399	4.49E-164	0
DEDD	2.48E-168	0.9530020713	0.335	0.126	1.41E-163	0
IMPDH2	2.59E-168	0.7077716631	0.551	0.27	1.47E-163	0
HIPK3	3.26E-168	0.5624742003	0.668	0.356	1.85E-163	0
MMRN1	3.26E-168	0.852969131	0.491	0.227	1.85E-163	0
DOCK11	7.05E-167	1.056376442	0.208	0.057	3.99E-162	0
LITAF	7.49E-166	1.015477954	0.596	0.322	4.24E-161	0
RSL1D1	2.76E-165	0.5480409805	0.658	0.348	1.56E-160	0
HSD17B11	4.78E-165	0.5611662824	0.63	0.325	2.71E-160	0
NFIL3	5.29E-165	1.097779874	0.276	0.094	3.00E-160	0
GLTSCR2	1.71E-164	0.8012766519	0.65	0.383	9.67E-160	0
CYTH1	2.78E-164	0.5682021487	0.65	0.343	1.57E-159	0
SLC25A44	2.79E-164	1.016400567	0.274	0.092	1.58E-159	0
BAALC	4.96E-164	0.9991564575	0.246	0.076	2.81E-159	0
KLF7	1.27E-162	0.575195563	0.578	0.289	7.19E-158	0
GCH1	1.61E-162	1.135358432	0.272	0.092	9.12E-158	0
ODC1	1.96E-162	0.829895991	0.437	0.194	1.11E-157	0
HSPA8	7.60E-162	0.580584186	0.969	0.724	4.31E-157	0
ICAM4	5.29E-161	0.9011709787	0.325	0.121	3.00E-156	0
CCDC47	5.82E-161	0.5603548127	0.565	0.279	3.30E-156	0
NANS	1.32E-160	0.6598345246	0.527	0.253	7.46E-156	0
BAZ1A	4.74E-160	0.6087898105	0.641	0.342	2.69E-155	0
FGL2	6.27E-160	1.114797695	0.205	0.058	3.55E-155	0
G0S2	6.51E-160	2.171597544	0.291	0.108	3.69E-155	0
EIF4A3	8.86E-160	0.620540612	0.52	0.25	5.02E-155	0
ANXA11	2.54E-159	0.5073063567	0.656	0.349	1.44E-154	0
MGLL	2.71E-159	0.5818009232	0.71	0.398	1.53E-154	0
MAP1LC3B	4.20E-159	0.5536055365	0.857	0.538	2.38E-154	0
LRIG3	2.92E-158	1.028443003	0.295	0.106	1.66E-153	0
TLL1	7.37E-158	0.6919223992	0.447	0.199	4.17E-153	0
OSBPL1A	1.72E-157	0.5805970445	0.418	0.18	9.71E-153	0
NGRN	4.46E-157	0.709952538	0.476	0.217	2.52E-152	0
AOC3	9.91E-157	0.6891751153	0.292	0.102	5.61E-152	0
MLF1	1.39E-156	0.8866747122	0.333	0.128	7.85E-152	0
CREM	1.67E-156	0.5885665385	0.438	0.197	9.43E-152	0
KLF4	2.94E-156	0.5608698357	0.841	0.522	1.66E-151	0
F8	1.36E-155	0.7609138751	0.258	0.085	7.71E-151	0
TCEB1	2.05E-155	0.8705360499	0.581	0.319	1.16E-150	0
MKL2	2.39E-155	0.7403105491	0.546	0.283	1.35E-150	0
PPP1R10	2.57E-154	0.5428170262	0.582	0.301	1.46E-149	0
AKIRIN1	2.68E-154	0.6763505939	0.408	0.176	1.52E-149	0
SH3BGRL2	1.57E-152	0.6104887623	0.372	0.151	8.89E-148	0
PIM1	2.84E-152	0.970721036	0.286	0.103	1.61E-147	0
HSPD1	6.87E-152	0.5017662656	0.812	0.5	3.89E-147	0
PDK4	1.24E-151	0.5495811372	0.633	0.34	7.04E-147	0
BCAM	2.31E-151	0.5381226817	0.9	0.598	1.31E-146	0
C21orf91	8.02E-151	0.7060594075	0.403	0.172	4.54E-146	0
PFKFB3	1.16E-150	0.8448011984	0.359	0.148	6.58E-146	0
TMTC1	1.36E-150	0.5657610769	0.449	0.202	7.68E-146	0
TIAM1	2.16E-150	0.9249179461	0.227	0.07	1.22E-145	0
SOX7	4.90E-149	0.7304405054	0.5	0.246	2.77E-144	0
GPRC5A	1.17E-148	1.403298132	0.148	0.034	6.62E-144	0
NOCT	2.81E-148	1.386776132	0.201	0.059	1.59E-143	0
HOXD1	3.88E-148	0.9737574455	0.264	0.092	2.19E-143	0
NPC2	1.57E-147	0.5086052659	0.945	0.671	8.88E-143	0
H2AFX	4.55E-147	0.5974241746	0.48	0.226	2.58E-142	0
MFSD14A	6.82E-147	0.7721058281	0.353	0.144	3.86E-142	0
PPP1R15B	1.23E-145	0.7908023278	0.421	0.193	6.96E-141	0
GRPEL1	1.73E-145	0.6178735366	0.417	0.186	9.79E-141	0
MTHFD2	2.54E-145	1.056824796	0.31	0.121	1.44E-140	0
UAP1	1.64E-144	0.8012132937	0.351	0.145	9.28E-140	0
USP36	2.01E-144	0.5974274568	0.365	0.152	1.14E-139	0
ITPR1	6.19E-144	0.6108441474	0.374	0.158	3.50E-139	0
PTGER4	6.26E-144	1.725767813	0.127	0.027	3.54E-139	0
PVRL2	8.90E-144	0.741899851	0.618	0.349	5.04E-139	0
TNFRSF10A	2.10E-143	0.8081919223	0.32	0.127	1.19E-138	0
CPXM2	3.65E-143	0.524197529	0.565	0.287	2.06E-138	0
MYRIP	7.97E-143	0.7443464749	0.327	0.129	4.52E-138	0
TSC22D2	1.82E-142	0.5503254122	0.471	0.223	1.03E-137	0
SEMA4A	2.11E-142	0.7543465887	0.255	0.088	1.20E-137	0
IFITM1	3.21E-142	0.5934396823	0.831	0.576	1.82E-137	0
CXCL2	3.01E-141	0.8586526908	0.521	0.271	1.70E-136	0
ATP6V0C	2.35E-140	0.5266650906	0.626	0.33	1.33E-135	0
NUP98	2.43E-140	0.7916456764	0.327	0.132	1.38E-135	0
LYRM1	2.44E-140	0.8064161838	0.329	0.133	1.38E-135	0
NR4A1	8.52E-140	0.5028303971	0.771	0.454	4.83E-135	0
GBP2	2.25E-139	0.5108326453	0.583	0.306	1.28E-134	0
LEPR	2.56E-139	0.8149961162	0.325	0.132	1.45E-134	0
MYO1E	6.77E-139	0.7513213601	0.457	0.219	3.83E-134	0
ARL13B	7.11E-138	0.7098684585	0.356	0.151	4.03E-133	0
PLCB4	8.98E-138	0.5428118124	0.381	0.163	5.08E-133	0
HLA-DOA	1.33E-137	0.8874027043	0.228	0.075	7.55E-133	0
GNB2L1	8.61E-136	0.6868018976	0.701	0.511	4.87E-131	0
B3GNT5	1.03E-135	0.6288553128	0.278	0.104	5.84E-131	0
SEPHS2	2.24E-135	0.6534507771	0.397	0.179	1.27E-130	0
GABRA2	4.64E-135	1.563021019	0.116	0.023	2.63E-130	0
NOP16	4.03E-134	0.8715592821	0.308	0.125	2.28E-129	0
TMEM2	2.62E-133	0.7657878499	0.51	0.266	1.48E-128	0
MAP2K3	3.49E-133	0.5135742098	0.44	0.208	1.98E-128	0
CD79B	1.96E-132	0.5293311457	0.372	0.161	1.11E-127	0
CCDC109B	2.32E-132	0.9620906452	0.353	0.156	1.31E-127	0
PLIN2	2.74E-132	0.543687584	0.504	0.255	1.55E-127	0
BTG3	5.14E-132	0.6696064402	0.406	0.187	2.91E-127	0
SLC10A6	1.93E-131	1.250809568	0.155	0.041	1.09E-126	0
IFNGR2	2.29E-131	0.5584239729	0.524	0.268	1.30E-126	0
NOP58	2.43E-131	0.5248630999	0.439	0.207	1.38E-126	0
RELB	2.76E-131	0.6515472409	0.521	0.269	1.56E-126	0
PDLIM3	4.39E-131	0.6476464332	0.38	0.17	2.48E-126	0
ARRDC3	1.76E-130	0.6519801795	0.613	0.347	9.95E-126	0
ETF1	1.92E-130	0.5399993383	0.432	0.205	1.09E-125	0
NSUN6	4.09E-130	0.7735926883	0.321	0.133	2.32E-125	0
THBD	4.44E-130	0.5741583337	0.71	0.427	2.51E-125	0
SEPW1	6.06E-130	0.7262317192	0.677	0.452	3.43E-125	0
SSH1	2.18E-129	0.5786773061	0.443	0.213	1.24E-124	0
AREG	4.40E-129	1.380453628	0.152	0.04	2.49E-124	0
GLA	6.36E-129	0.9616946735	0.304	0.125	3.60E-124	0
CADM3	2.95E-128	1.13924377	0.217	0.073	1.67E-123	0
ALDH1A3	1.60E-127	0.9396690058	0.181	0.054	9.04E-123	0
BZW2	1.94E-127	0.5562635856	0.482	0.241	1.10E-122	0
ZFP36L2	5.02E-127	0.5432158923	0.877	0.614	2.84E-122	0
TP53BP2	9.55E-127	0.8554517333	0.282	0.111	5.41E-122	0
PRNP	1.11E-126	0.6674149503	0.418	0.2	6.30E-122	0
SEMA3E	1.34E-126	1.401231908	0.136	0.033	7.58E-122	0
SERPINA3.1	1.96E-126	2.337418722	0.114	0.024	1.11E-121	0
TOMM5	4.80E-126	0.5039337581	0.651	0.369	2.72E-121	0
FBXO31	8.63E-126	0.5943117251	0.325	0.136	4.89E-121	0
CYBRD1	9.35E-126	0.6437441117	0.268	0.101	5.29E-121	0
CITED2	2.39E-125	0.5335542569	0.457	0.224	1.36E-120	0
HSF1	2.79E-125	0.5250832754	0.504	0.26	1.58E-120	0
FRMD3	3.28E-125	1.040237017	0.172	0.05	1.85E-120	0
BCL3	3.30E-125	0.5372228119	0.532	0.28	1.87E-120	0
SHB	5.79E-125	1.043241714	0.214	0.073	3.28E-120	0
GCA	3.28E-124	0.6609876969	0.298	0.121	1.86E-119	0
PPRC1	9.85E-124	0.9285100186	0.244	0.09	5.58E-119	0
PCBD1	1.14E-122	0.6933218678	0.325	0.139	6.44E-118	0
RPL17	2.12E-122	0.5685451423	0.903	0.678	1.20E-117	0
SERTAD2	3.85E-121	0.7184146244	0.337	0.149	2.18E-116	0
COBLL1	5.63E-121	0.6666796013	0.262	0.1	3.19E-116	0
SAV1	6.55E-120	0.6796395499	0.491	0.26	3.71E-115	0
SLC25A33	2.29E-119	0.854700534	0.257	0.099	1.30E-114	0
MID1	1.31E-118	0.6109520061	0.309	0.13	7.43E-114	0
TPBG	1.92E-118	0.5763244857	0.359	0.161	1.09E-113	0
CPVL	2.38E-118	0.7832139969	0.255	0.098	1.35E-113	0
EMILIN2	2.64E-118	1.257262265	0.129	0.032	1.49E-113	0
SNAPC1	8.32E-118	0.8171048847	0.28	0.114	4.71E-113	0
SLC25A32	4.46E-117	0.6283758438	0.331	0.145	2.53E-112	0
SPSB1	5.89E-117	0.8531064354	0.264	0.105	3.33E-112	0
PNPLA8	7.70E-117	0.5035070585	0.425	0.208	4.36E-112	0
RLIM	9.17E-117	0.5942161289	0.34	0.151	5.20E-112	0
RGS16	2.40E-116	0.6340569171	0.591	0.336	1.36E-111	0
NDRG1	5.41E-116	0.5189530585	0.812	0.52	3.06E-111	0
CYP1B1	9.11E-116	0.7057111591	0.404	0.197	5.16E-111	0
DENND4A	6.59E-115	0.6626105281	0.294	0.123	3.73E-110	0
SGMS2	5.36E-114	1.495128627	0.135	0.036	3.04E-109	0
GADD45A	5.99E-114	0.5842892705	0.508	0.272	3.39E-109	0
SERPINA3	2.26E-113	2.103136896	0.147	0.043	1.28E-108	0
CSF1	5.65E-113	0.5824310016	0.261	0.102	3.20E-108	0
TACSTD2	7.48E-113	0.9687177389	0.308	0.134	4.24E-108	0
USP12	8.07E-113	0.7143863508	0.318	0.141	4.57E-108	0
ARAP2	9.12E-113	1.076770226	0.167	0.052	5.17E-108	0
ZBTB21	1.00E-112	0.8574558728	0.202	0.07	5.67E-108	0
TRAF4	1.21E-112	0.7761626865	0.252	0.099	6.85E-108	0
RFX2	3.53E-112	0.8209322387	0.245	0.095	2.00E-107	0
EGR2	3.80E-112	1.031210534	0.155	0.045	2.15E-107	0
SUSD6	4.37E-112	0.5236846115	0.366	0.17	2.47E-107	0
TICAM1	5.62E-112	0.8119143582	0.259	0.103	3.18E-107	0
OTUD4	5.91E-112	0.6489523171	0.35	0.161	3.34E-107	0
IRAK2	4.42E-111	0.9854893839	0.237	0.091	2.50E-106	0
DNAJB9	4.54E-111	0.5329000911	0.381	0.183	2.57E-106	0
CDH26	4.62E-111	1.676882389	0.105	0.023	2.61E-106	0
FOXC1	7.82E-111	0.5315530819	0.445	0.227	4.43E-106	0
SSBP2	9.08E-111	0.5730314384	0.226	0.083	5.14E-106	0
HIVEP2	1.42E-110	0.8629196567	0.22	0.082	8.03E-106	0
RRAGC	2.20E-110	0.6410936332	0.295	0.125	1.25E-105	0
CDKN3	4.41E-110	0.7379217592	0.281	0.118	2.50E-105	0
PAF1	9.13E-110	0.5731999133	0.345	0.158	5.17E-105	0
TAF4B	9.65E-110	0.9956000337	0.173	0.055	5.46E-105	0
POLR1C	1.02E-109	0.7324292698	0.241	0.093	5.76E-105	0
ERRFI1	1.76E-109	0.7062369576	0.229	0.086	9.98E-105	0
AC090498.1	3.23E-109	0.7383384789	0.573	0.344	1.83E-104	0
WDR43	4.47E-109	0.5193795798	0.309	0.134	2.53E-104	0
ERVK3-1	7.13E-109	0.6761891591	0.281	0.118	4.04E-104	0
EEF1G	9.31E-108	0.6326432658	0.646	0.428	5.27E-103	0
CRYL1	7.64E-107	0.5253779566	0.342	0.157	4.32E-102	0
RNF138	1.80E-106	0.5634766739	0.348	0.162	1.02E-101	0
SIK2	3.28E-106	0.6089155454	0.328	0.15	1.86E-101	0
POSTN	1.79E-105	0.8489666729	0.482	0.275	1.01E-100	0
AC058791.1	1.79E-105	0.8411273613	0.187	0.064	1.01E-100	0
DCUN1D3	3.12E-104	0.728756379	0.253	0.103	1.77E-99	0
ZPR1	2.43E-103	0.6513821024	0.299	0.132	1.38E-98	0
TMEM185B	5.12E-101	0.8796720269	0.183	0.064	2.90E-96	0
NR1H3	3.06E-100	0.9355669371	0.124	0.034	1.73E-95	0
OSBPL10	3.38E-100	0.5342081476	0.265	0.112	1.91E-95	0
C4orf32	6.53E-100	0.687482064	0.392	0.203	3.70E-95	0
TCEA3	4.21E-99	0.8129568932	0.166	0.055	2.38E-94	0
RRP12	8.47E-99	0.7258746957	0.254	0.106	4.80E-94	0
MT1X	9.67E-98	0.7482937901	0.393	0.201	5.48E-93	0
RYBP	5.28E-97	0.5115130479	0.369	0.186	2.99E-92	0
MT-ND4L	8.00E-97	0.5541087336	0.889	0.706	4.53E-92	0
TOR3A	1.62E-96	0.7290420229	0.253	0.107	9.16E-92	0
N4BP2L1	1.49E-95	0.5203807623	0.238	0.097	8.44E-91	0
CALML4	1.50E-95	0.5733985923	0.288	0.127	8.49E-91	0
MTRF1L	2.54E-95	0.6533364886	0.272	0.12	1.44E-90	0
IGF2BP2	1.07E-94	0.8237923061	0.173	0.06	6.04E-90	0
CCDC178	1.56E-94	0.8569583205	0.19	0.07	8.86E-90	0
NRARP	3.30E-94	0.5044610619	0.239	0.098	1.87E-89	0
USP53	4.63E-94	0.5205940069	0.26	0.112	2.62E-89	0
HLA-DQA2	1.26E-93	0.7031799499	0.296	0.136	7.12E-89	0
PRKAR1B	3.26E-93	0.5075958437	0.305	0.141	1.85E-88	0
BACH1	1.06E-92	0.5621835866	0.258	0.112	5.98E-88	0
CDIP1	2.25E-91	0.6161768433	0.223	0.09	1.28E-86	0
MEX3C	3.68E-91	0.5504029118	0.321	0.154	2.08E-86	0
ERI1	7.34E-91	0.8504544658	0.17	0.06	4.16E-86	0
PPIF	1.54E-90	1.01176661	0.157	0.053	8.69E-86	0
HIVEP1	2.72E-90	0.5691233568	0.27	0.121	1.54E-85	0
KLHL21	3.22E-90	0.7503399956	0.173	0.062	1.82E-85	0
CTTNBP2	4.80E-90	0.7933897344	0.158	0.053	2.72E-85	0
AKAP2	5.71E-90	1.009112887	0.26	0.118	3.23E-85	0
SLC16A7	6.55E-90	0.5909665025	0.27	0.121	3.71E-85	0
ST6GALNAC6	7.97E-90	0.5307645712	0.255	0.111	4.51E-85	0
TGIF2	3.06E-89	0.578979322	0.246	0.106	1.73E-84	0
TSHZ1	4.14E-89	0.5518957791	0.314	0.152	2.35E-84	0
DYRK3	5.55E-89	0.8772388801	0.16	0.056	3.14E-84	0
SESN3	8.51E-89	0.5358835492	0.33	0.16	4.82E-84	0
CORO2A	1.58E-88	0.8109641773	0.163	0.057	8.95E-84	0
PTPN1	1.58E-88	0.5026967934	0.325	0.158	8.97E-84	0
3-3월	2.76E-88	0.5957529479	0.354	0.18	1.56E-83	0
EHD1	3.41E-88	0.5377227733	0.319	0.154	1.93E-83	0
TTC39A	4.85E-88	1.281688799	0.128	0.039	2.75E-83	0
CCDC68	5.25E-88	0.5366344976	0.28	0.128	2.98E-83	0
MT2A	6.46E-88	0.6624087964	0.792	0.568	3.66E-83	0
LPCAT3	1.43E-87	0.594565963	0.23	0.097	8.10E-83	0
UTP4	1.44E-87	0.7497777047	0.19	0.073	8.14E-83	0
DSG2	5.54E-86	0.8439310693	0.138	0.045	3.14E-81	0
HAUS4	2.85E-85	0.7548932899	0.237	0.103	1.61E-80	0
HSPB8	1.18E-84	0.6708546777	0.318	0.158	6.71E-80	0
DDX59	1.38E-83	0.6148601654	0.208	0.085	7.83E-79	0
RNF19B	3.21E-82	0.6767641561	0.268	0.125	1.82E-77	0
CXCL3	3.55E-82	0.8896465423	0.264	0.124	2.01E-77	0
GALNT15	1.78E-80	0.5887618485	0.137	0.045	1.01E-75	0
DENND2D	2.66E-80	0.8051178535	0.161	0.059	1.50E-75	0
CYB5D1	5.32E-80	0.6631406641	0.176	0.068	3.01E-75	0
ALDH1A2	2.70E-79	1.044899622	0.115	0.035	1.53E-74	0
LAMA3	2.73E-79	0.5280708512	0.166	0.062	1.54E-74	0
TGFB3	4.83E-79	0.99900777	0.104	0.029	2.74E-74	0
PLCXD3	1.58E-78	0.5521482055	0.161	0.059	8.97E-74	0
HMOX1	2.56E-78	0.817976179	0.239	0.109	1.45E-73	0
RP11-536O18.1	8.98E-78	0.829806907	0.236	0.107	5.08E-73	0
CACHD1	2.23E-77	0.5014185298	0.182	0.072	1.26E-72	0
NR3C2	9.24E-77	0.6422417631	0.128	0.042	5.23E-72	0
SLC9B2	1.35E-76	0.7368430609	0.178	0.071	7.62E-72	0
RASL11A	2.45E-76	0.9977229274	0.125	0.041	1.39E-71	0
HMGA1	5.29E-76	0.5827205435	0.23	0.103	3.00E-71	0
KRT7	7.11E-76	0.7489967941	0.137	0.047	4.02E-71	0
HINT3	7.57E-75	0.6771389186	0.188	0.078	4.28E-70	0
MINA	1.27E-74	0.9163463711	0.187	0.078	7.18E-70	0
CFB	3.24E-74	0.8661149011	0.188	0.078	1.84E-69	0
RBBP8	3.45E-74	0.6175401718	0.169	0.066	1.95E-69	0
ARG2	3.84E-73	1.225588298	0.141	0.051	2.18E-68	0
SECTM1	7.70E-73	0.9036442756	0.112	0.035	4.36E-68	0
LMNB1	6.86E-72	0.9993141516	0.142	0.052	3.89E-67	0
TRIM16	7.86E-72	0.6610115217	0.186	0.078	4.45E-67	0
TBC1D8	9.46E-72	0.5433173729	0.158	0.06	5.35E-67	0
MED24	2.78E-71	0.8523203968	0.268	0.134	1.57E-66	0
EPB41	4.02E-71	0.5261040821	0.142	0.052	2.28E-66	0
LRRC70	5.43E-71	0.7473469625	0.186	0.078	3.07E-66	0
PTGS2	1.25E-70	0.7171914815	0.204	0.091	7.08E-66	0
ACVR1B	3.67E-70	0.6112488569	0.139	0.05	2.08E-65	0
SETBP1	4.40E-70	0.7351503353	0.14	0.051	2.49E-65	0
TLCD2	5.77E-70	0.6334441198	0.109	0.034	3.27E-65	0
FN3K	7.65E-70	0.8577464065	0.138	0.051	4.33E-65	0
ST8SIA4	1.46E-69	0.6755865358	0.283	0.146	8.27E-65	0
MOB3B	1.47E-69	0.6945000781	0.169	0.069	8.30E-65	0
SRPX	1.38E-68	0.6204353204	0.175	0.072	7.83E-64	0
APEX2	3.38E-68	0.6365199208	0.178	0.075	1.91E-63	0
DUSP2	4.04E-68	0.6470619585	0.141	0.053	2.29E-63	0
TSPAN1	7.98E-68	0.7772434996	0.126	0.044	4.52E-63	0
C11orf1	3.76E-67	0.5274241611	0.216	0.099	2.13E-62	0
GRHL1	3.95E-67	0.8688230613	0.109	0.036	2.24E-62	0
TNFSF9	5.30E-67	1.074551273	0.123	0.043	3.00E-62	0
CCRL2	6.63E-67	0.7951753683	0.166	0.068	3.75E-62	0
SOCS1	1.35E-66	0.6618467991	0.17	0.071	7.64E-62	0
C21orf59	5.28E-66	0.5648542619	0.266	0.134	2.99E-61	0
AK4	8.22E-66	0.507907083	0.178	0.075	4.65E-61	0
C9orf40	1.65E-65	0.5978021916	0.149	0.058	9.37E-61	0
GNAL	2.82E-65	0.9462556049	0.106	0.035	1.60E-60	0
C10orf11	3.20E-65	0.5399007586	0.263	0.132	1.81E-60	0
C15orf57	3.84E-65	0.6222104106	0.222	0.105	2.17E-60	0
PLEKHA7	4.47E-65	0.5934471174	0.165	0.068	2.53E-60	0
RP4-575N6.4	5.94E-65	0.7938583799	0.14	0.053	3.36E-60	0
FAM110B	6.69E-65	0.9542754631	0.128	0.047	3.79E-60	0
PYGO2	2.80E-64	0.5801568098	0.123	0.044	1.59E-59	0
DAPK1	6.59E-64	0.7281560702	0.148	0.059	3.73E-59	0
PPARD	9.46E-64	0.6774531584	0.135	0.051	5.36E-59	0
VIM-AS1	2.81E-63	0.8239185293	0.123	0.044	1.59E-58	0
ANKRD42	9.24E-63	0.6195730721	0.117	0.041	5.23E-58	0
SENCR	1.45E-62	0.5006490225	0.187	0.083	8.20E-58	0
MAOA	1.47E-62	0.5053522485	0.205	0.094	8.35E-58	0
PVT1	4.14E-62	0.5999734527	0.14	0.054	2.35E-57	0
ZNF331	4.58E-62	0.5593011537	0.135	0.052	2.59E-57	0
ZMYM6NB	7.49E-62	0.6838167747	0.274	0.142	4.24E-57	0
RP11-138A9.1	1.04E-61	0.5571383197	0.196	0.09	5.88E-57	0
BMP2	2.02E-61	0.6837096605	0.229	0.113	1.14E-56	0
PEX5	5.05E-60	0.6943944151	0.132	0.051	2.86E-55	0
NOP2	1.34E-59	0.584387685	0.175	0.077	7.59E-55	0
SNN	1.44E-59	0.5976969065	0.157	0.066	8.15E-55	0
FKBPL	3.07E-58	0.611993535	0.114	0.041	1.74E-53	0
KITLG	1.16E-57	0.5843994787	0.185	0.085	6.55E-53	0
NINJ2	1.79E-56	0.6275725643	0.138	0.056	1.01E-51	0
DNAJC25-GNG10	1.62E-55	0.9079811606	0.159	0.07	9.20E-51	0
KRBA2	2.59E-55	0.6841999551	0.11	0.04	1.46E-50	0
GEM	6.71E-55	0.9029809474	0.189	0.09	3.80E-50	0
IL6R	9.17E-55	0.6784170522	0.106	0.038	5.19E-50	0
KCNMB3	2.35E-54	0.5911279616	0.119	0.046	1.33E-49	0
SERPINF2	2.44E-53	0.9310848206	0.108	0.04	1.38E-48	0
AFAP1L2	1.63E-52	0.5003479335	0.127	0.051	9.25E-48	0
TRPM6	3.05E-52	0.6840319505	0.112	0.043	1.73E-47	0
PROX1	3.22E-52	0.5677365541	0.109	0.041	1.83E-47	0
TNFAIP8	2.06E-51	0.5934600298	0.171	0.08	1.16E-46	0
KLHL15	2.21E-51	0.5051587068	0.123	0.049	1.25E-46	0
SLC39A14	3.84E-51	0.5235026322	0.145	0.063	2.18E-46	0
UTP11L	3.05E-50	0.5129227317	0.235	0.125	1.73E-45	0
TMEM176B	1.97E-49	0.6613720063	0.159	0.073	1.12E-44	0
CXCL8	6.22E-49	0.9424499042	0.184	0.092	3.52E-44	0
MATR3.1	1.09E-48	0.5265960249	0.201	0.102	6.16E-44	0
TMEM176A	4.68E-48	0.5999473331	0.157	0.073	2.65E-43	0
SPATA6L	5.34E-48	0.8567751275	0.107	0.042	3.02E-43	0
DIABLO	2.19E-47	0.8013470859	0.146	0.066	1.24E-42	0
CCDC86	2.55E-47	0.5953984763	0.13	0.056	1.45E-42	0
ZNF460	1.23E-45	0.6093054418	0.108	0.043	6.95E-41	0
GKAP1	3.20E-45	0.5169079312	0.101	0.039	1.81E-40	0
KIAA1683	7.59E-45	0.7059636826	0.112	0.046	4.30E-40	0
MIR155HG	7.73E-45	0.8467094228	0.134	0.06	4.38E-40	0
SERPINB8	1.80E-44	0.6082996211	0.126	0.055	1.02E-39	0
ADCK3	4.52E-44	0.7846602198	0.131	0.058	2.56E-39	0
UTP15	1.99E-43	0.5435058672	0.113	0.047	1.13E-38	0
ZNF200	2.29E-43	0.6053454024	0.108	0.044	1.30E-38	0
RNASE4	8.14E-43	0.5428935007	0.113	0.048	4.61E-38	0
MAD2L1BP	9.15E-43	0.5394358482	0.135	0.062	5.18E-38	0
FLJ20021	3.63E-42	0.892355585	0.133	0.061	2.05E-37	0
ZNF410	4.15E-42	0.5850018833	0.125	0.056	2.35E-37	0
RCL1	6.18E-42	0.500069426	0.123	0.054	3.50E-37	0
AC013461.1	2.61E-41	0.6923396294	0.135	0.063	1.48E-36	0
UBD	1.42E-40	0.6978112193	0.191	0.104	8.03E-36	0
MEDAG	1.70E-40	0.8384990703	0.111	0.048	9.60E-36	0
PALM2-AKAP2	5.86E-39	0.6955368792	0.17	0.089	3.32E-34	0
MB21D1	2.08E-36	0.653718385	0.122	0.057	1.18E-31	0
BRE	1.18E-35	0.5422036856	0.15	0.077	6.69E-31	0
CH25H	1.62E-35	0.56969463	0.164	0.086	9.18E-31	0
GAS5	8.34E-27	0.5020620493	0.178	0.106	4.72E-22	0
HAS2	1.69E-25	0.7478407725	0.103	0.053	9.59E-21	0
LRRC16A	1.01E-23	0.5011173556	0.103	0.053	5.69E-19	0
CLU1	0	1.243916579	0.928	0.509	0	1
HLA-DRA1	8.61E-306	0.9335530965	0.977	0.743	4.88E-301	1
TXNIP	5.20E-295	1.170429711	0.91	0.597	2.95E-290	1
IL331	1.60E-278	1.151803235	0.778	0.409	9.08E-274	1
ADIRF	3.15E-266	0.9704729301	0.944	0.634	1.79E-261	1
HLA-DQA11	2.44E-262	1.190533997	0.717	0.345	1.38E-257	1
ACKR11	1.63E-259	0.9265691553	0.917	0.716	9.21E-255	1
HLA-DPA11	1.88E-256	0.9157654651	0.939	0.657	1.06E-251	1
CTSC1	1.57E-236	1.160839258	0.745	0.419	8.87E-232	1
LIFR1	1.28E-235	1.159895599	0.685	0.341	7.26E-231	1
TSPAN71	2.43E-235	0.9958892541	0.841	0.513	1.38E-230	1
HLA-DPB11	1.57E-216	0.844756842	0.907	0.625	8.86E-212	1
C71	2.06E-210	1.572735884	0.42	0.155	1.17E-205	1
RPL3	1.24E-203	0.5090065022	0.997	0.936	7.00E-199	1
GIMAP7	1.31E-203	0.8923586673	0.795	0.493	7.44E-199	1
ADM51	1.24E-201	1.295465527	0.522	0.23	7.05E-197	1
CD741	3.36E-200	0.7787438696	0.995	0.902	1.90E-195	1
TFPI1	8.66E-194	0.9131553878	0.741	0.421	4.90E-189	1
SPARCL1	8.53E-193	0.5792741026	0.99	0.903	4.83E-188	1
HLA-DMA1	4.05E-192	0.7969082901	0.792	0.472	2.29E-187	1
LGALS31	1.72E-188	0.7813352206	0.886	0.632	9.72E-184	1
CCL141	1.11E-187	1.154594573	0.787	0.489	6.31E-183	1
HLA-DQB11	4.24E-185	0.8590519867	0.763	0.443	2.40E-180	1
CCL231	1.20E-183	1.563166175	0.397	0.152	6.82E-179	1
NRN11	4.19E-182	0.9398218018	0.66	0.362	2.37E-177	1
HLA-DRB11	1.17E-172	0.6815205702	0.976	0.775	6.65E-168	1
TACR11	2.93E-172	1.278605653	0.369	0.139	1.66E-167	1
SNCG	2.04E-169	0.7951590336	0.766	0.472	1.15E-164	1
AQP1	4.86E-169	0.6587934681	0.935	0.738	2.75E-164	1
NPC21	3.70E-168	0.7026377584	0.921	0.68	2.10E-163	1
TPD52L11	1.25E-165	1.021329344	0.54	0.266	7.06E-161	1
NUPR1	3.11E-163	1.110906078	0.417	0.174	1.76E-158	1
IL1R11	3.52E-158	0.8653626417	0.613	0.325	1.99E-153	1
ANKRD291	4.98E-157	1.005211585	0.418	0.178	2.82E-152	1
PLSCR41	1.24E-154	1.076965067	0.423	0.183	7.00E-150	1
TESC1	4.92E-149	1.119083299	0.453	0.212	2.79E-144	1
TNFSF10	6.50E-146	0.6389852919	0.789	0.528	3.68E-141	1
OLFM11	9.48E-145	1.02953537	0.568	0.314	5.37E-140	1
KCTD121	3.29E-143	0.9147524386	0.671	0.403	1.86E-138	1
HLA-DRB51	9.67E-143	0.6855809909	0.838	0.542	5.48E-138	1
IGFBP21	1.07E-136	0.9476648008	0.437	0.202	6.07E-132	1
SERPING11	3.59E-133	0.7802378498	0.673	0.399	2.03E-128	1
ZNF385D1	1.05E-132	0.698581943	0.756	0.473	5.93E-128	1
TGFBR31	1.42E-130	0.7699689492	0.616	0.355	8.06E-126	1
GPR146	1.85E-128	1.002804321	0.371	0.162	1.05E-123	1
FAM13C1	1.04E-127	1.009550476	0.349	0.147	5.92E-123	1
PDK41	3.17E-126	0.7669043151	0.62	0.348	1.79E-121	1
JAM2	4.81E-125	0.6471529578	0.75	0.491	2.72E-120	1
LPCAT41	1.76E-121	0.8827049932	0.496	0.262	9.98E-117	1
MMRN11	4.68E-121	1.073468041	0.463	0.236	2.65E-116	1
HLA-DQA21	1.08E-119	1.380835137	0.324	0.137	6.09E-115	1
RSPO3	1.06E-117	1.528350591	0.216	0.071	6.02E-113	1
FAM110D	1.25E-117	0.9225524344	0.413	0.199	7.10E-113	1
LRRC11	3.47E-116	0.9466216115	0.41	0.198	1.97E-111	1
FOS	2.77E-112	0.5209080751	0.963	0.826	1.57E-107	1
PDIA51	5.47E-112	0.9151254703	0.431	0.219	3.10E-107	1
PLCXD31	2.32E-110	1.493962542	0.187	0.059	1.31E-105	1
HSD17B111	2.06E-109	0.7075755314	0.576	0.337	1.16E-104	1
SCARB11	2.78E-108	0.869465434	0.366	0.169	1.57E-103	1
CYTL11	9.16E-106	0.9632535885	0.374	0.178	5.19E-101	1
SYT15	2.79E-105	1.062041441	0.281	0.116	1.58E-100	1
CADM31	4.00E-104	1.444057986	0.215	0.077	2.27E-99	1
TLL11	1.61E-103	0.9739865995	0.409	0.209	9.13E-99	1
CYGB1	1.39E-102	1.198220248	0.245	0.095	7.86E-98	1
CLDN51	8.28E-100	0.6192364904	0.789	0.561	4.69E-95	1
TIAM11	1.24E-99	1.268839868	0.211	0.076	6.99E-95	1
SYNGR2	6.42E-99	0.6261787195	0.689	0.459	3.64E-94	1
ZFP36L21	1.48E-98	0.5784759682	0.833	0.625	8.36E-94	1
GIMAP4	3.41E-98	0.5279367885	0.71	0.476	1.93E-93	1
PLSCR11	5.13E-92	0.5159467043	0.762	0.518	2.90E-87	1
SH3BGRL21	2.18E-90	0.9112227277	0.331	0.16	1.24E-85	1
MET1	3.01E-89	0.9033899018	0.362	0.184	1.71E-84	1
CYSLTR1	1.05E-88	0.8707790359	0.32	0.152	5.94E-84	1
CTNNAL1	6.68E-87	0.7269776317	0.525	0.318	3.78E-82	1
HLA-DOA1	9.08E-87	1.189428688	0.209	0.081	5.14E-82	1
GIMAP8	1.50E-86	0.6572534237	0.381	0.197	8.48E-82	1
RHOU1	1.47E-85	0.799332016	0.312	0.146	8.30E-81	1
IGFBP4	2.08E-85	0.5110202081	0.942	0.793	1.18E-80	1
PERP1	2.23E-85	0.6969165913	0.463	0.259	1.26E-80	1
EDN1	1.58E-84	1.023014138	0.424	0.236	8.93E-80	1
HLA-DMB	3.15E-82	0.7364144421	0.382	0.204	1.78E-77	1
CPVL1	6.38E-81	1.07404836	0.239	0.103	3.61E-76	1
MEOX2	1.26E-80	0.8130296028	0.363	0.191	7.16E-76	1
PIK3IP1	1.28E-80	1.00245463	0.177	0.064	7.26E-76	1
CPXM21	3.78E-80	0.7151965209	0.495	0.301	2.14E-75	1
SOCS21	5.54E-79	0.5772524385	0.534	0.327	3.14E-74	1
RCN1	6.82E-77	0.5191968742	0.676	0.458	3.86E-72	1
TNFRSF1B	2.36E-76	0.587221416	0.436	0.25	1.34E-71	1
CTTNBP21	7.87E-75	1.195012746	0.158	0.056	4.45E-70	1
EPHX1	1.86E-74	0.6317494063	0.485	0.297	1.05E-69	1
CADM3-AS1	3.65E-73	0.9250661671	0.236	0.105	2.07E-68	1
C1QTNF11	8.20E-73	0.8803568991	0.301	0.151	4.64E-68	1
PCDH191	2.51E-71	0.9443335995	0.209	0.088	1.42E-66	1
MYRIP1	1.34E-70	0.8666438582	0.283	0.138	7.58E-66	1
PSIP1	7.56E-69	0.565163682	0.479	0.3	4.28E-64	1
ELOVL71	2.66E-67	0.772124443	0.317	0.166	1.50E-62	1
GIMAP1	2.97E-67	0.5017961613	0.467	0.287	1.68E-62	1
MLPH	2.14E-66	0.7503181309	0.2	0.084	1.21E-61	1
METTL7A	3.93E-66	0.7983238447	0.25	0.119	2.23E-61	1
SPTLC2	9.32E-66	0.6092458623	0.439	0.269	5.28E-61	1
MKL21	2.10E-65	0.7579352309	0.464	0.297	1.19E-60	1
SEMA6A1	3.89E-65	0.6021133779	0.402	0.234	2.20E-60	1
FLOT2	5.02E-65	0.6187006017	0.377	0.216	2.84E-60	1
TPD52	1.47E-64	0.7989739628	0.189	0.079	8.32E-60	1
BAALC1	1.57E-64	0.9450734215	0.197	0.085	8.89E-60	1
DSG21	2.18E-63	1.113564316	0.134	0.047	1.24E-58	1
FRMD31	3.11E-63	1.306904759	0.147	0.055	1.76E-58	1
F81	7.40E-63	0.8692926737	0.21	0.094	4.19E-58	1
GIPC2	7.53E-63	0.8105938933	0.267	0.134	4.27E-58	1
HOPX1	9.87E-63	1.23372099	0.149	0.057	5.59E-58	1
SYBU1	2.98E-62	0.8687447899	0.213	0.097	1.69E-57	1
SELENOP	4.69E-62	0.6448541608	0.225	0.103	2.65E-57	1
RBIS	9.59E-62	0.8283729535	0.15	0.056	5.43E-57	1
LYST	4.04E-61	0.5375807722	0.372	0.214	2.29E-56	1
RAB3C	8.27E-61	0.714354013	0.337	0.187	4.68E-56	1
CCDC681	1.91E-60	0.8734367216	0.262	0.133	1.08E-55	1
MRTFB	1.96E-60	0.8936081511	0.194	0.084	1.11E-55	1
GIMAP2	1.03E-59	0.6972319072	0.257	0.129	5.83E-55	1
C1orf115	2.99E-57	0.6078884035	0.295	0.159	1.69E-52	1
PRXL2A	9.33E-57	0.9706718966	0.162	0.067	5.28E-52	1
SEPTIN10	1.14E-56	0.8047004085	0.144	0.055	6.44E-52	1
SLC41A3	2.34E-56	0.6729920462	0.346	0.201	1.33E-51	1
DOCK111	4.34E-56	0.9658964625	0.159	0.065	2.46E-51	1
AK41	6.34E-56	0.9615558506	0.178	0.077	3.59E-51	1
CYBRD11	4.56E-55	0.7708146923	0.224	0.11	2.58E-50	1
PLAAT3	5.39E-55	0.7500639325	0.142	0.054	3.05E-50	1
KLHL3	1.26E-52	0.5145780451	0.235	0.117	7.15E-48	1
DIPK1B	1.82E-52	0.7099483073	0.12	0.043	1.03E-47	1
ALDH6A1	3.05E-52	0.9270065995	0.144	0.059	1.73E-47	1
HINT2	3.55E-52	0.6173076169	0.274	0.148	2.01E-47	1
ANXA4	8.96E-52	0.5301667111	0.423	0.268	5.08E-47	1
GNB4	2.73E-51	0.5076593157	0.408	0.257	1.55E-46	1
RUNX1T1	6.03E-50	0.5795262295	0.218	0.108	3.42E-45	1
TMEM273	7.49E-50	0.6239088705	0.18	0.082	4.24E-45	1
HRCT1	1.38E-49	0.7118844337	0.164	0.072	7.84E-45	1
RBM43	1.41E-49	0.6106598354	0.16	0.069	7.99E-45	1
TCEA31	4.01E-49	1.053422518	0.143	0.06	2.27E-44	1
PLCB41	6.49E-49	0.5857398013	0.307	0.175	3.68E-44	1
MMP28	2.78E-48	0.6208299744	0.29	0.164	1.57E-43	1
SERPINF21	7.72E-48	1.361219675	0.111	0.041	4.37E-43	1
ITPRID2	8.95E-48	0.6823312487	0.147	0.062	5.07E-43	1
TSPAN11	9.78E-48	1.206936742	0.12	0.047	5.54E-43	1
CORO2A1	1.42E-47	1.047335139	0.143	0.061	8.02E-43	1
SEPTIN7	1.55E-47	0.6733352642	0.182	0.084	8.79E-43	1
CRYL11	2.85E-47	0.699111973	0.289	0.167	1.61E-42	1
RASSF9	2.04E-46	0.7806369377	0.215	0.11	1.15E-41	1
SRPX1	2.34E-46	1.045117523	0.165	0.076	1.32E-41	1
RAB11FIP1	3.62E-46	0.7979727248	0.144	0.062	2.05E-41	1
CFB1	6.24E-46	0.9305646136	0.174	0.082	3.54E-41	1
FGD4	1.01E-45	0.5415692063	0.235	0.124	5.70E-41	1
TMEM176A1	3.54E-45	1.096336742	0.161	0.074	2.01E-40	1
CALHM2	4.74E-45	0.5467335359	0.289	0.166	2.68E-40	1
AKR1C3	1.84E-44	0.5999138656	0.385	0.247	1.04E-39	1
CCDC1781	3.13E-44	1.052660188	0.161	0.075	1.77E-39	1
PCBD11	3.44E-44	0.6886024815	0.264	0.149	1.95E-39	1
RESF1	7.66E-44	0.6583096459	0.103	0.038	4.34E-39	1
LEPR1	1.44E-43	0.7059193746	0.256	0.143	8.13E-39	1
ADRB21	8.55E-43	0.5717592533	0.252	0.139	4.84E-38	1
CD302	9.34E-43	0.6102739615	0.217	0.115	5.29E-38	1
GAS51	1.38E-42	0.8749879839	0.204	0.105	7.79E-38	1
ESYT1	2.15E-42	0.5248167051	0.261	0.148	1.22E-37	1
BMP4	4.18E-42	1.030429788	0.149	0.068	2.37E-37	1
AGPAT2	8.55E-42	0.5427290326	0.329	0.202	4.84E-37	1
KLF8	2.29E-41	0.538090607	0.19	0.095	1.29E-36	1
SEMA3E1	7.97E-41	1.156184935	0.102	0.039	4.51E-36	1
SNHG6	1.65E-40	0.6253409975	0.196	0.1	9.36E-36	1
FAM213A	1.86E-40	0.5601442148	0.46	0.33	1.05E-35	1
ABCA1	3.11E-40	0.7301161005	0.139	0.062	1.76E-35	1
ZNF395	4.89E-40	0.7480366123	0.133	0.058	2.77E-35	1
GASK1B	8.41E-40	0.5966265582	0.151	0.069	4.76E-35	1
EIF4E3	1.71E-39	0.8173280868	0.114	0.047	9.66E-35	1
CIAO2B	2.11E-39	0.623495555	0.105	0.041	1.20E-34	1
ADAM23	2.53E-39	1.03287068	0.118	0.05	1.43E-34	1
MICOS13	3.27E-39	0.5351346819	0.123	0.052	1.85E-34	1
RNASE41	6.00E-39	0.8803653637	0.116	0.049	3.40E-34	1
BLOC1S5	1.14E-38	0.9006968231	0.116	0.049	6.47E-34	1
TMEM176B1	1.79E-38	1.030033401	0.156	0.075	1.02E-33	1
LAMA31	4.29E-38	0.8186985753	0.143	0.066	2.43E-33	1
ZFAND1	5.93E-38	0.5254633838	0.314	0.196	3.36E-33	1
ALDH1A31	6.19E-38	0.9399961127	0.134	0.061	3.51E-33	1
SMIM10	9.96E-38	0.6829264482	0.21	0.115	5.64E-33	1
SIRPA	1.63E-37	0.5297701646	0.23	0.129	9.21E-33	1
MAOA1	3.20E-37	0.7613606598	0.188	0.099	1.81E-32	1
SNCA	7.89E-37	0.5089400457	0.266	0.157	4.47E-32	1
NOP53	1.98E-36	0.5354967891	0.352	0.229	1.12E-31	1
SNHG5	6.54E-36	0.5293414903	0.199	0.105	3.70E-31	1
LYRM9	8.66E-36	0.6933977649	0.118	0.052	4.91E-31	1
GCHFR	1.89E-35	0.7466861922	0.122	0.055	1.07E-30	1
AVPR2	3.13E-35	0.540039293	0.183	0.097	1.77E-30	1
SCN1B	4.72E-35	0.5126687542	0.202	0.111	2.67E-30	1
PTK2B	1.58E-34	0.5007129883	0.161	0.081	8.94E-30	1
AOPEP	2.30E-34	0.5757697339	0.111	0.048	1.31E-29	1
C1R	5.25E-34	0.5142173457	0.274	0.168	2.97E-29	1
MEGF6	1.99E-33	0.7164036032	0.118	0.053	1.13E-28	1
LPCAT31	3.90E-33	0.6967829557	0.188	0.104	2.21E-28	1
ECHDC2	4.66E-33	0.7031020129	0.158	0.082	2.64E-28	1
NT5DC1	1.06E-32	0.6271035973	0.234	0.14	6.01E-28	1
KRT71	1.09E-32	0.838777938	0.114	0.051	6.17E-28	1
AHNAK2	1.15E-32	0.6796298144	0.163	0.085	6.49E-28	1
DIXDC1	1.53E-32	0.5015692466	0.288	0.183	8.65E-28	1
TMEM35B	1.78E-32	0.6389074748	0.119	0.054	1.01E-27	1
POSTN1	1.89E-32	0.5479273094	0.409	0.287	1.07E-27	1
GLTSCR21	2.60E-32	0.505852846	0.509	0.403	1.47E-27	1
ADGRG6	3.11E-32	0.5001063144	0.205	0.115	1.76E-27	1
TM7SF3	3.90E-32	0.5718931388	0.218	0.127	2.21E-27	1
EPB411	1.37E-31	0.7248247953	0.12	0.056	7.78E-27	1
ABCG2	1.58E-31	0.5161379374	0.186	0.102	8.96E-27	1
PRKAR1B1	3.06E-31	0.526546232	0.246	0.151	1.73E-26	1
AFAP1L21	4.25E-31	0.6525357303	0.116	0.054	2.41E-26	1
CALML41	8.34E-31	0.6264731054	0.228	0.137	4.72E-26	1
IL10RB	9.68E-31	0.5054015551	0.197	0.112	5.48E-26	1
CDKN31	3.17E-30	0.7347875492	0.216	0.128	1.79E-25	1
CASP6	3.81E-30	0.6617536331	0.153	0.08	2.16E-25	1
C10orf128	1.02E-29	0.748169344	0.279	0.184	5.76E-25	1
CUTC	1.56E-29	0.5606159729	0.188	0.107	8.84E-25	1
PTAFR	4.49E-29	0.7162663879	0.2	0.118	2.54E-24	1
HDDC3	4.87E-29	0.5907406448	0.161	0.087	2.76E-24	1
HPF1	6.56E-29	0.53907048	0.123	0.06	3.71E-24	1
FGF2	7.83E-29	0.7032540411	0.129	0.065	4.44E-24	1
DNASE2	2.10E-28	0.5266868425	0.204	0.12	1.19E-23	1
KCNMB31	2.79E-28	0.8279336355	0.105	0.049	1.58E-23	1
DENND2D1	4.12E-28	0.8255149324	0.128	0.064	2.33E-23	1
SELENBP1	6.46E-28	0.7739350322	0.107	0.05	3.66E-23	1
IL15	1.71E-27	0.53159088	0.231	0.144	9.68E-23	1
GPR68	1.88E-27	0.6110483842	0.186	0.108	1.07E-22	1
SCARA3	3.94E-27	0.7736915025	0.108	0.051	2.23E-22	1
ST6GALNAC1	4.84E-27	0.7721235379	0.12	0.06	2.74E-22	1
GALNT151	6.31E-27	0.6898687302	0.106	0.05	3.57E-22	1
UBE2D4	8.50E-27	0.6502428064	0.177	0.102	4.81E-22	1
STEAP3	1.52E-26	0.6873098059	0.113	0.055	8.59E-22	1
SNHG29	1.60E-26	0.6254697439	0.213	0.13	9.06E-22	1
TSPYL5	1.87E-26	0.6768443476	0.113	0.056	1.06E-21	1
FAM104A	3.97E-26	0.552851424	0.191	0.113	2.25E-21	1
BMX	4.57E-26	0.6011247269	0.139	0.074	2.59E-21	1
ASRGL1	4.98E-26	0.6349723491	0.223	0.14	2.82E-21	1
TOR3A1	7.96E-25	0.5661312165	0.192	0.116	4.51E-20	1
EPHX2	1.01E-24	0.5340764214	0.128	0.067	5.74E-20	1
KIF19	3.22E-24	0.5683642501	0.123	0.065	1.82E-19	1
C1RL	5.87E-24	0.5653726292	0.181	0.108	3.32E-19	1
PLEKHA71	6.24E-24	0.5909493993	0.135	0.073	3.53E-19	1
FLRT2	9.20E-24	0.5145766573	0.168	0.098	5.21E-19	1
C1S	2.83E-23	0.5301030082	0.146	0.083	1.60E-18	1
ACP2	4.90E-23	0.5359740083	0.171	0.102	2.77E-18	1
COPZ2	8.91E-23	0.5959687936	0.126	0.068	5.04E-18	1
RNF144B	2.80E-22	0.5132783374	0.109	0.056	1.59E-17	1
CCN2	2.02E-21	0.8153071232	0.139	0.078	1.14E-16	1
SNAP25	3.27E-21	0.567895441	0.12	0.065	1.85E-16	1
FAM124A	5.90E-21	0.5001191694	0.145	0.084	3.34E-16	1
RASSF7	6.15E-21	0.5563483649	0.11	0.058	3.48E-16	1
MOB3B1	1.46E-20	0.6239518225	0.131	0.075	8.28E-16	1
ACADS	2.79E-20	0.5425853084	0.117	0.064	1.58E-15	1
HDAC9	5.92E-20	0.5816543406	0.125	0.071	3.35E-15	1
FUCA1	1.86E-19	0.5246952705	0.103	0.055	1.05E-14	1
C9orf401	2.43E-19	0.506542269	0.115	0.064	1.38E-14	1
PQLC3	4.15E-19	0.5884272989	0.216	0.147	2.35E-14	1
TMEM220	5.50E-19	0.6261466789	0.11	0.06	3.12E-14	1
ENPP4	1.04E-18	0.5400421235	0.107	0.058	5.90E-14	1
SETBP11	2.16E-18	0.8431092668	0.104	0.057	1.23E-13	1
REEP4	2.89E-18	0.5065887139	0.111	0.062	1.64E-13	1
TM6SF1	5.24E-18	0.5687676199	0.15	0.092	2.97E-13	1
SIRT5	5.79E-18	0.5094053951	0.111	0.062	3.28E-13	1
PXMP2	6.87E-18	0.5209960809	0.109	0.061	3.89E-13	1
LRRC8D	1.13E-17	0.676176083	0.107	0.06	6.40E-13	1
PUS3	4.21E-17	0.5644487207	0.1	0.055	2.38E-12	1
CCDC109B1	1.56E-16	0.5005063371	0.239	0.171	8.81E-12	1
C8orf82	1.70E-14	0.544005875	0.104	0.061	9.62E-10	1
C10orf10	7.10E-12	0.510174364	0.186	0.132	4.02E-07	1
CH25H1	3.70E-07	0.5495575199	0.126	0.092	0.02096142785	1
RPL34	8.74E-114	0.508266159	0.982	0.971	4.95E-109	2
RPL41	1.50E-96	0.5938790881	0.975	0.97	8.50E-92	2
ADIRF1	6.86E-74	0.7827205298	0.742	0.654	3.89E-69	2
CLU2	9.07E-46	0.8109446737	0.629	0.539	5.14E-41	2
RPL31	1.15E-41	0.5970837299	0.804	0.856	6.53E-37	2
RPS29	2.23E-39	0.5020498977	0.821	0.852	1.26E-34	2
TXNIP1	8.44E-38	0.8193150737	0.645	0.622	4.78E-33	2
CCL142	3.38E-29	0.7985569188	0.562	0.511	1.91E-24	2
RPL36A	4.90E-22	0.6013032661	0.659	0.703	2.78E-17	2
GIPC21	8.00E-18	0.5248144337	0.074	0.153	4.53E-13	2
TPD52L12	8.52E-17	0.537939694	0.176	0.301	4.82E-12	2
LRRC12	1.66E-13	0.6369415185	0.133	0.224	9.43E-09	2
TRAPPC6A	2.18E-13	0.5416492218	0.103	0.181	1.24E-08	2
CDK11B	1.19E-12	0.5214514963	0.076	0.14	6.75E-08	2
SCN1B1	1.65E-12	0.5068491201	0.065	0.124	9.33E-08	2
PGM5	1.94E-12	0.531224398	0.08	0.143	1.10E-07	2
OARD1	2.48E-12	0.5246564541	0.07	0.13	1.40E-07	2
UNG	3.11E-12	0.5101724131	0.054	0.107	1.76E-07	2
PLSCR42	3.19E-12	0.51952115	0.128	0.211	1.80E-07	2
PIR	4.30E-12	0.5093428795	0.069	0.129	2.43E-07	2
C1orf1151	6.63E-12	0.6842952845	0.104	0.177	3.75E-07	2
GPR1461	7.95E-12	0.5388069587	0.112	0.187	4.50E-07	2
CKS1B	1.19E-11	0.557774953	0.067	0.124	6.73E-07	2
TUBGCP2	4.01E-11	0.5330226983	0.078	0.137	2.27E-06	2
CPVL2	1.17E-10	0.5283484752	0.067	0.119	6.63E-06	2
TMEM107	2.06E-10	0.6116793474	0.066	0.118	1.16E-05	2
ID1	2.67E-10	0.6688870858	0.55	0.594	1.51E-05	2
SERTAD4-AS1	2.91E-10	0.5557174829	0.12	0.192	1.65E-05	2
SMIM4	3.52E-10	0.5640593195	0.079	0.135	1.99E-05	2
KLHL31	5.71E-10	0.7702898547	0.077	0.133	3.23E-05	2
LTC4S	8.35E-10	0.5516987165	0.11	0.177	4.73E-05	2
LENG1	8.37E-10	0.5770724791	0.066	0.116	4.74E-05	2
TACR12	9.70E-10	0.6308167451	0.101	0.164	5.49E-05	2
SYT151	1.33E-09	0.8131361931	0.08	0.136	7.56E-05	2
TSNAX	2.28E-09	0.5348038323	0.094	0.153	0.0001288901886	2
SNHG291	3.60E-09	0.9607919801	0.173	0.134	0.0002038801148	2
IGKC	3.06E-08	0.6387189053	0.111	0.168	0.001730227541	2
KAT2A	3.60E-08	0.5231954266	0.065	0.109	0.0020383397	2
NUPR11	4.79E-08	0.5914732226	0.133	0.201	0.002713349823	2
METTL7A1	7.06E-08	0.7079387181	0.084	0.134	0.003995398729	2
KLF81	7.47E-08	0.5102184055	0.065	0.107	0.004232403719	2
OXLD1	7.49E-08	0.5553584067	0.067	0.11	0.004242944967	2
CD14	2.55E-07	0.5535123322	0.081	0.127	0.01442365672	2
FAM110D1	3.29E-07	0.5530822844	0.153	0.224	0.01860455795	2
GIMAP11	5.53E-07	0.5278471093	0.217	0.311	0.03134330245	2
PLEKHJ1	7.52E-07	0.5042442278	0.068	0.108	0.04258409192	2
SERF2	4.74E-128	0.6795631798	0.894	0.922	2.68E-123	3
TMSB10	9.20E-122	0.5642134404	0.991	0.988	5.21E-117	3
LGALS1	6.01E-113	1.537874919	0.657	0.544	3.41E-108	3
COL4A1	9.43E-108	1.180257131	0.677	0.576	5.34E-103	3
SPARC	1.47E-97	0.7842698111	0.842	0.857	8.33E-93	3
RGCC	5.11E-82	1.734019404	0.5	0.359	2.90E-77	3
ESM1	9.63E-81	1.956476167	0.137	0.039	5.46E-76	3
GNG11	2.42E-65	0.8010206835	0.757	0.844	1.37E-60	3
PPAP2A	2.00E-63	2.257757139	0.128	0.041	1.13E-58	3
PFN1	8.39E-61	0.7066784531	0.756	0.815	4.75E-56	3
MYL6	3.08E-58	0.5074005703	0.873	0.922	1.74E-53	3
COL4A2	1.65E-54	0.9867781942	0.62	0.611	9.32E-50	3
SLC9A3R2	1.71E-42	1.557934577	0.435	0.366	9.67E-38	3
TMA7	6.37E-34	0.7007808421	0.658	0.779	3.61E-29	3
RPL27A	5.35E-32	0.5922507062	0.789	0.876	3.03E-27	3
S100A11	3.64E-29	0.5628669457	0.732	0.827	2.06E-24	3
RPL38	1.19E-28	0.5287689166	0.76	0.868	6.74E-24	3
CTSD	1.76E-28	0.5201091512	0.188	0.373	9.94E-24	3
MRPL28	9.08E-26	0.5154527816	0.103	0.229	5.14E-21	3
CA2	1.00E-25	1.913601849	0.161	0.093	5.67E-21	3
MRPL54	1.76E-24	0.5026322562	0.147	0.293	9.95E-20	3
MRPS16	3.69E-24	0.5116893353	0.111	0.238	2.09E-19	3
SPATS2L	7.87E-24	0.5257987214	0.111	0.236	4.46E-19	3
POLR2K	1.17E-23	0.5305939146	0.197	0.373	6.65E-19	3
COPS8	4.38E-23	0.5037825283	0.119	0.246	2.48E-18	3
RALA	4.44E-23	0.5544021428	0.147	0.29	2.51E-18	3
MRPL13	4.55E-23	0.5352777086	0.096	0.211	2.58E-18	3
SPTSSA	4.78E-23	0.6137416354	0.133	0.269	2.71E-18	3
ZNF580	1.94E-22	0.5791162163	0.1	0.213	1.10E-17	3
MRPL22	2.65E-22	0.5696329465	0.117	0.24	1.50E-17	3
UFM1	4.09E-22	0.5432400209	0.166	0.317	2.31E-17	3
KIFC3	4.20E-22	0.5111300819	0.12	0.245	2.38E-17	3
RASSF1	4.85E-22	0.5006493275	0.083	0.187	2.75E-17	3
TBC1D1	5.09E-22	0.5234168333	0.093	0.202	2.88E-17	3
SSNA1	9.44E-22	0.5458643763	0.156	0.299	5.34E-17	3
PPM1F	1.58E-21	0.5052216806	0.124	0.247	8.93E-17	3
ABI3	1.78E-21	0.5348035223	0.136	0.267	1.01E-16	3
NME4	1.83E-21	0.5979635087	0.128	0.254	1.04E-16	3
MRPL14	3.01E-21	0.5890036171	0.112	0.23	1.71E-16	3
SNRPE	3.47E-21	0.5165666692	0.232	0.42	1.96E-16	3
PIN1	3.81E-21	0.6409689127	0.144	0.28	2.16E-16	3
CAPZA1	4.98E-21	0.6956563768	0.141	0.275	2.82E-16	3
SDF2L1	1.59E-20	0.6042482785	0.117	0.235	8.98E-16	3
PCNA	1.68E-20	0.5120610373	0.061	0.147	9.51E-16	3
NDUFB6	2.86E-20	0.5762824551	0.203	0.373	1.62E-15	3
ZEB1	3.15E-20	0.5275631739	0.18	0.331	1.79E-15	3
PAICS	3.47E-20	0.5021372762	0.048	0.128	1.96E-15	3
LSM4	3.58E-20	0.5315010335	0.148	0.282	2.02E-15	3
PAPSS1	3.89E-20	0.6375808611	0.076	0.17	2.20E-15	3
TSR2	3.90E-20	0.5726845627	0.064	0.152	2.21E-15	3
JOSD2	4.05E-20	0.5033093634	0.093	0.196	2.29E-15	3
NDUFAB1	4.23E-20	0.5250549736	0.229	0.413	2.39E-15	3
COA6	7.46E-20	0.5812220404	0.06	0.145	4.22E-15	3
DPY30	1.09E-19	0.592707409	0.125	0.244	6.16E-15	3
COPE	1.21E-19	0.5037255718	0.242	0.43	6.84E-15	3
ATP5F1E	1.24E-19	0.8875212515	0.408	0.357	7.05E-15	3
MRPS33	1.38E-19	0.5074963663	0.084	0.18	7.81E-15	3
RFXANK	1.47E-19	0.5415261641	0.088	0.187	8.32E-15	3
MRPL27	1.56E-19	0.6632176892	0.123	0.242	8.81E-15	3
NSRP1	1.85E-19	0.5305936773	0.142	0.267	1.05E-14	3
DYNC1I2	1.91E-19	0.5515848028	0.194	0.353	1.08E-14	3
MRPL47	2.14E-19	0.6321939385	0.115	0.229	1.21E-14	3
NDUFA2	2.18E-19	0.5036319859	0.235	0.417	1.24E-14	3
PLS3	3.16E-19	0.5265074853	0.184	0.335	1.79E-14	3
MAPK1	3.64E-19	0.5256822272	0.087	0.184	2.06E-14	3
LSM1	4.60E-19	0.5490442895	0.1	0.203	2.61E-14	3
COPS7A	5.97E-19	0.5855261318	0.046	0.121	3.38E-14	3
SSSCA1	8.70E-19	0.5507244627	0.09	0.187	4.93E-14	3
UBA3	9.93E-19	0.5141409815	0.059	0.139	5.62E-14	3
ZNF428	1.17E-18	0.5570970802	0.188	0.341	6.62E-14	3
RSU1	1.27E-18	0.6196975617	0.187	0.336	7.20E-14	3
PLOD1	1.27E-18	0.5009299404	0.096	0.194	7.21E-14	3
GTF2H5	1.34E-18	0.5557515515	0.146	0.271	7.59E-14	3
ITPA	1.73E-18	0.6227314741	0.082	0.175	9.77E-14	3
TCEAL4	1.73E-18	0.5373729318	0.259	0.453	9.82E-14	3
ELOF1	1.82E-18	0.5306802205	0.054	0.132	1.03E-13	3
TADA3	2.02E-18	0.5348309606	0.051	0.127	1.14E-13	3
COA3	2.05E-18	0.6533996703	0.144	0.269	1.16E-13	3
MOCS2	2.24E-18	0.5477746252	0.083	0.176	1.27E-13	3
MZT1	2.39E-18	0.5324682481	0.044	0.116	1.35E-13	3
LIMCH1	2.49E-18	0.5320539698	0.104	0.206	1.41E-13	3
LEPROTL1	2.90E-18	0.6253049259	0.115	0.223	1.64E-13	3
IGFBP5	3.22E-18	0.9102070912	0.216	0.146	1.82E-13	3
SNRNP27	3.54E-18	0.515008888	0.076	0.164	2.00E-13	3
MRPS26	3.93E-18	0.596373532	0.094	0.192	2.23E-13	3
WDR18	4.08E-18	0.640815689	0.058	0.136	2.31E-13	3
MRPL34	5.17E-18	0.6173023699	0.134	0.252	2.93E-13	3
PDCL	6.10E-18	0.6197864822	0.092	0.188	3.45E-13	3
BOLA3	1.40E-17	0.5702602348	0.114	0.218	7.95E-13	3
APOLD11	1.73E-17	0.5110345677	0.22	0.376	9.78E-13	3
MEAF6	2.55E-17	0.6019920676	0.127	0.238	1.44E-12	3
REEP3	2.59E-17	0.5454725219	0.117	0.222	1.47E-12	3
LYRM4	2.65E-17	0.5775750293	0.083	0.172	1.50E-12	3
TAF11	2.82E-17	0.5921914193	0.094	0.188	1.60E-12	3
TMEM160	3.34E-17	0.5563016556	0.158	0.286	1.89E-12	3
HSPG2	3.95E-17	0.5671783502	0.684	0.824	2.23E-12	3
ASAH1	4.09E-17	0.5782349065	0.128	0.238	2.32E-12	3
FAM96B	4.29E-17	0.5162375681	0.217	0.375	2.43E-12	3
CARD16	4.30E-17	0.5507203833	0.218	0.378	2.43E-12	3
COX6C	4.40E-17	0.7699606262	0.583	0.721	2.49E-12	3
POLD2	6.94E-17	0.5514653121	0.067	0.146	3.93E-12	3
LAMTOR2	1.08E-16	0.5494076932	0.226	0.393	6.13E-12	3
GSTO1	1.12E-16	0.5439213604	0.247	0.425	6.35E-12	3
INSR	1.29E-16	1.302729993	0.353	0.323	7.32E-12	3
SNF8	1.32E-16	0.5258641497	0.105	0.204	7.45E-12	3
DDIT4	1.54E-16	1.193098972	0.404	0.392	8.74E-12	3
PDZD11	1.73E-16	0.569539346	0.069	0.149	9.80E-12	3
CYB5D2	2.00E-16	0.7199206545	0.066	0.143	1.13E-11	3
POLR2J	2.02E-16	0.5984857194	0.173	0.304	1.14E-11	3
LINC00116	2.69E-16	0.5362979231	0.104	0.199	1.52E-11	3
DDA1	2.70E-16	0.6563348242	0.075	0.156	1.53E-11	3
LXN	3.68E-16	0.6008573243	0.106	0.202	2.08E-11	3
ZNF677	6.17E-16	0.5406757507	0.046	0.112	3.49E-11	3
MAGED1	6.51E-16	0.7292189082	0.077	0.158	3.69E-11	3
UBALD2	6.86E-16	0.6694299782	0.092	0.181	3.88E-11	3
ASNSD1	8.03E-16	0.5543491212	0.067	0.143	4.55E-11	3
NDUFA6	8.28E-16	0.6620360687	0.216	0.371	4.69E-11	3
MRPL55	8.76E-16	0.6323311311	0.128	0.234	4.96E-11	3
EEF1E1	8.94E-16	0.5632826706	0.067	0.143	5.06E-11	3
GPX8	9.60E-16	0.5666968538	0.055	0.124	5.44E-11	3
MRPL51	1.01E-15	0.5094445891	0.265	0.454	5.73E-11	3
BDKRB2	1.29E-15	0.5692983271	0.058	0.128	7.29E-11	3
NDUFV3	1.42E-15	0.5152620004	0.077	0.156	8.05E-11	3
WIPF1	1.43E-15	0.581066718	0.073	0.151	8.08E-11	3
PRELID1	1.57E-15	0.5396072452	0.28	0.479	8.90E-11	3
TMUB2	1.66E-15	0.5517971001	0.055	0.125	9.40E-11	3
MYO6	2.26E-15	0.5813354097	0.125	0.227	1.28E-10	3
DPM2	2.36E-15	0.6164227998	0.1	0.191	1.34E-10	3
GNPAT	2.36E-15	0.5035334774	0.057	0.126	1.34E-10	3
COMMD2	3.11E-15	0.5911697446	0.087	0.171	1.76E-10	3
URI1	3.51E-15	0.5819680709	0.041	0.103	1.99E-10	3
UROS	4.20E-15	0.6475573704	0.058	0.128	2.38E-10	3
DRAP1	5.26E-15	0.5749219525	0.219	0.371	2.98E-10	3
CALM1	6.02E-15	0.663099024	0.678	0.805	3.41E-10	3
PPP2R5B	7.20E-15	0.5353466865	0.049	0.113	4.08E-10	3
MDFI	7.25E-15	0.515861265	0.056	0.123	4.11E-10	3
LAYN	8.77E-15	0.6385776065	0.073	0.149	4.97E-10	3
RAPGEF1	8.89E-15	0.6294228769	0.081	0.16	5.03E-10	3
TRPC4AP	1.27E-14	0.5010243563	0.068	0.14	7.19E-10	3
RMND5A	1.71E-14	0.6029985658	0.048	0.11	9.67E-10	3
STC2	2.47E-14	0.5874254389	0.068	0.139	1.40E-09	3
MKRN1	2.62E-14	0.5487012245	0.061	0.128	1.48E-09	3
DHRS4L2	3.80E-14	0.5665665185	0.044	0.104	2.15E-09	3
PNKD	3.84E-14	0.7130515756	0.16	0.277	2.17E-09	3
MMAB	3.97E-14	0.6481492067	0.051	0.114	2.25E-09	3
CHCHD7	4.17E-14	0.5374631391	0.059	0.126	2.36E-09	3
EMC8	4.18E-14	0.5940388498	0.084	0.162	2.37E-09	3
MMP14	5.13E-14	0.5764653782	0.112	0.202	2.90E-09	3
POLR2F	5.22E-14	0.6549084652	0.202	0.342	2.95E-09	3
COX5B	5.37E-14	0.7426961605	0.565	0.704	3.04E-09	3
AKIP1	5.44E-14	0.5407253555	0.06	0.126	3.08E-09	3
GIMAP5	6.05E-14	0.5143281803	0.089	0.168	3.43E-09	3
ABHD17A	8.31E-14	0.5728224268	0.139	0.242	4.70E-09	3
YBEY	8.67E-14	0.5573859929	0.052	0.114	4.91E-09	3
TSEN15	9.87E-14	0.7425118584	0.05	0.111	5.59E-09	3
ABR	9.98E-14	0.5790670225	0.043	0.1	5.65E-09	3
BTBD3	1.03E-13	0.5145666516	0.061	0.127	5.83E-09	3
RCC2	1.16E-13	0.5109864938	0.069	0.138	6.60E-09	3
PKIG	1.17E-13	0.7190941648	0.209	0.349	6.62E-09	3
UBL5	1.64E-13	0.7643522203	0.553	0.684	9.28E-09	3
TTF1	1.71E-13	0.6943319146	0.052	0.113	9.70E-09	3
CBX1	1.72E-13	0.5314869235	0.069	0.139	9.74E-09	3
SOCS4	1.88E-13	0.5405387503	0.047	0.106	1.07E-08	3
EIF3J	2.01E-13	0.7055723915	0.182	0.307	1.14E-08	3
TCEAL8	2.32E-13	0.7182561902	0.169	0.288	1.31E-08	3
GOLIM4	2.43E-13	0.7113072763	0.135	0.235	1.38E-08	3
B3GAT3	2.55E-13	0.6179064303	0.078	0.151	1.44E-08	3
PFDN4	2.64E-13	0.6943745302	0.151	0.259	1.50E-08	3
NDUFB3	2.65E-13	0.5886212543	0.212	0.355	1.50E-08	3
BID	3.24E-13	0.6519357173	0.111	0.199	1.83E-08	3
CMSS1	3.27E-13	0.5067837141	0.06	0.123	1.85E-08	3
POP7	3.39E-13	0.6018495678	0.074	0.145	1.92E-08	3
CDK2AP1	3.51E-13	0.5897583677	0.084	0.158	1.99E-08	3
PLPP2	3.88E-13	0.5615873222	0.05	0.109	2.20E-08	3
ANXA2R	4.17E-13	0.5826354973	0.061	0.124	2.36E-08	3
ENOPH1	5.01E-13	0.8131068525	0.055	0.117	2.83E-08	3
PPP1R12C	5.43E-13	0.5519225018	0.049	0.107	3.07E-08	3
FDPS	5.80E-13	0.5439998944	0.241	0.396	3.29E-08	3
MRPL36	5.87E-13	0.6724786157	0.139	0.24	3.33E-08	3
NQO1	6.27E-13	0.6984498245	0.138	0.237	3.55E-08	3
KRT8	6.48E-13	0.6146683728	0.068	0.135	3.67E-08	3
SCAND1	6.97E-13	0.5885439487	0.275	0.455	3.95E-08	3
SQLE	7.08E-13	0.6419125955	0.058	0.12	4.01E-08	3
RNASEH2C	7.53E-13	0.6759953436	0.178	0.299	4.27E-08	3
GGA1	9.53E-13	0.5011318974	0.061	0.123	5.40E-08	3
RASGRF2	1.01E-12	0.5060394403	0.049	0.106	5.71E-08	3
SORBS2	1.12E-12	0.557781434	0.124	0.215	6.33E-08	3
ZBTB8OS	1.15E-12	0.7632149678	0.081	0.152	6.49E-08	3
SNRPD1	1.19E-12	0.6597061593	0.254	0.421	6.75E-08	3
NME1	1.35E-12	0.6029592997	0.147	0.247	7.67E-08	3
FAM118A	1.46E-12	0.517398497	0.095	0.171	8.25E-08	3
DPM3	1.53E-12	0.5784380115	0.18	0.299	8.68E-08	3
RCBTB2	1.57E-12	0.5085910186	0.05	0.107	8.86E-08	3
SPRED1	1.64E-12	0.777184655	0.053	0.112	9.29E-08	3
BRD9	1.68E-12	0.6061386255	0.071	0.137	9.53E-08	3
ABI2	1.79E-12	0.5199231072	0.074	0.142	1.01E-07	3
JAM3	2.69E-12	0.5177017892	0.057	0.117	1.52E-07	3
CSNK1G2	3.06E-12	0.5644543269	0.068	0.132	1.73E-07	3
SEPP1	3.75E-12	0.8877309653	0.137	0.233	2.12E-07	3
AGRN	4.06E-12	0.6753636746	0.122	0.209	2.30E-07	3
UBE2F	4.69E-12	0.7165117379	0.058	0.118	2.66E-07	3
LSM10	7.60E-12	0.810551028	0.074	0.14	4.30E-07	3
PCSK7	7.69E-12	0.6146750517	0.102	0.179	4.36E-07	3
TTC14	7.71E-12	0.5055437983	0.102	0.178	4.37E-07	3
SMCO4	8.10E-12	0.6273151864	0.055	0.113	4.59E-07	3
SPG7	8.54E-12	0.543792354	0.149	0.248	4.83E-07	3
NDUFAF4	9.25E-12	0.7631665234	0.062	0.122	5.24E-07	3
NSD1	1.07E-11	0.6162728632	0.088	0.159	6.04E-07	3
CFDP1	1.10E-11	0.6261458637	0.211	0.343	6.20E-07	3
PTPRN2	1.18E-11	0.6768689204	0.091	0.163	6.70E-07	3
EXOSC4	1.25E-11	0.7204987359	0.059	0.118	7.05E-07	3
TIMM13	1.39E-11	0.7068948161	0.228	0.373	7.85E-07	3
NDUFC1	1.43E-11	0.6032213087	0.289	0.475	8.08E-07	3
PLEKHJ11	1.52E-11	0.6001855164	0.054	0.109	8.58E-07	3
TTYH3	1.67E-11	0.5775177266	0.087	0.157	9.47E-07	3
APOPT1	1.69E-11	0.6437650492	0.052	0.106	9.59E-07	3
PLPP1	1.86E-11	1.280930721	0.2	0.325	1.06E-06	3
C19orf70	1.96E-11	0.5814878495	0.22	0.355	1.11E-06	3
PKN1	2.38E-11	0.6595839655	0.123	0.208	1.35E-06	3
KLHL5	2.45E-11	0.7022593824	0.089	0.159	1.39E-06	3
RPRD1A	2.54E-11	0.6736796363	0.063	0.121	1.44E-06	3
FAM129B	2.58E-11	0.6350283185	0.138	0.229	1.46E-06	3
PRMT1	2.59E-11	0.6274831921	0.279	0.452	1.47E-06	3
DGKZ	3.13E-11	0.683844049	0.111	0.191	1.77E-06	3
ARHGEF10	3.84E-11	0.5296995252	0.054	0.108	2.17E-06	3
ATP5J2	3.87E-11	0.6400985612	0.17	0.275	2.19E-06	3
TIMM17B	3.89E-11	0.642778965	0.07	0.131	2.21E-06	3
TMEM47	3.93E-11	0.6404539316	0.056	0.111	2.22E-06	3
ROBO4	3.95E-11	0.5346973748	0.25	0.399	2.23E-06	3
IGKC1	4.40E-11	1.378991042	0.099	0.168	2.49E-06	3
ZNF511	4.61E-11	0.5328905071	0.05	0.102	2.61E-06	3
ASAP2	5.43E-11	0.5515622349	0.069	0.129	3.08E-06	3
LBH	5.55E-11	0.8537274079	0.15	0.246	3.14E-06	3
MRPL1	5.59E-11	0.6409775468	0.057	0.112	3.17E-06	3
H2AFJ	5.99E-11	0.7437015359	0.166	0.273	3.39E-06	3
C6orf226	6.18E-11	0.5806449252	0.058	0.113	3.50E-06	3
HOXD9	6.30E-11	0.6613154486	0.121	0.202	3.57E-06	3
SEMA3F	6.39E-11	0.5997821426	0.123	0.206	3.62E-06	3
ANKRD40	8.75E-11	0.7356674562	0.05	0.102	4.95E-06	3
MCF2L	1.03E-10	0.5501055258	0.135	0.222	5.84E-06	3
ATP5PO	1.09E-10	0.5865127551	0.082	0.147	6.19E-06	3
ZFHX3	1.25E-10	0.6310209411	0.081	0.144	7.07E-06	3
NDUFA12	1.28E-10	0.6272463906	0.295	0.473	7.25E-06	3
YKT6	1.31E-10	0.6960161102	0.049	0.1	7.41E-06	3
HIGD1A	1.74E-10	0.6217292507	0.064	0.121	9.83E-06	3
PIN4	1.99E-10	0.8165249264	0.136	0.224	1.13E-05	3
MAML2	2.07E-10	0.6036554195	0.076	0.137	1.17E-05	3
PDE8A	2.29E-10	0.6684013191	0.083	0.148	1.29E-05	3
ATP5PB	2.30E-10	0.693724449	0.077	0.139	1.30E-05	3
MXD4	2.30E-10	0.7062352481	0.09	0.157	1.30E-05	3
DGKH	2.49E-10	0.6585834354	0.101	0.173	1.41E-05	3
TSC2	2.68E-10	0.5695875688	0.067	0.123	1.52E-05	3
SLC30A5	2.85E-10	0.8980170144	0.053	0.104	1.61E-05	3
IGFBP3	2.92E-10	1.120781004	0.18	0.136	1.65E-05	3
SYNPO	2.95E-10	0.7059385731	0.189	0.3	1.67E-05	3
ORAI2	2.96E-10	0.8707763857	0.086	0.151	1.67E-05	3
GPR4	3.14E-10	0.6948559126	0.108	0.182	1.78E-05	3
ARL15	3.41E-10	0.5523887345	0.057	0.109	1.93E-05	3
ASPSCR1	3.79E-10	0.6272135006	0.053	0.103	2.15E-05	3
R3HCC1	3.95E-10	0.6187767224	0.05	0.1	2.24E-05	3
ARPC5	4.61E-10	0.6353663833	0.297	0.48	2.61E-05	3
EIF2B4	5.05E-10	0.5345539582	0.055	0.106	2.86E-05	3
IFI27L2	6.04E-10	0.8413745697	0.09	0.156	3.42E-05	3
PPP6R1	6.89E-10	0.6599145129	0.052	0.101	3.90E-05	3
MTRNR2L8	7.08E-10	1.182499158	0.207	0.166	4.01E-05	3
SLC27A3	7.25E-10	0.5557030539	0.063	0.116	4.11E-05	3
YWHAH	7.86E-10	0.5551538033	0.312	0.49	4.45E-05	3
HTRA1	8.03E-10	0.564490165	0.29	0.453	4.54E-05	3
ISG20	9.28E-10	0.5562479659	0.096	0.162	5.26E-05	3
NRGN	1.01E-09	0.7893254291	0.064	0.118	5.74E-05	3
ANAPC15	1.03E-09	0.6549180081	0.064	0.118	5.83E-05	3
PRKCDBP	1.06E-09	0.5181104412	0.215	0.332	5.98E-05	3
PSMA4	1.09E-09	0.6471402097	0.276	0.436	6.17E-05	3
C8orf33	1.18E-09	0.8431502133	0.086	0.148	6.67E-05	3
GALK1	1.20E-09	0.6326208367	0.063	0.116	6.79E-05	3
MCAM	1.34E-09	0.5518543128	0.262	0.404	7.57E-05	3
UQCR10	1.36E-09	0.6829141055	0.257	0.404	7.73E-05	3
CDC42EP1	1.41E-09	0.8918941887	0.125	0.205	7.99E-05	3
NDUFA13	1.42E-09	0.5158231164	0.266	0.412	8.04E-05	3
LSM7	1.51E-09	0.6400430742	0.277	0.439	8.56E-05	3
SOS1	1.54E-09	0.5821144688	0.086	0.147	8.74E-05	3
NREP	1.56E-09	0.6450117669	0.155	0.246	8.81E-05	3
HRAS	1.59E-09	0.8219262051	0.065	0.118	8.98E-05	3
CRNDE	1.62E-09	0.7877213581	0.057	0.107	9.19E-05	3
NELFB	1.74E-09	0.6508214209	0.054	0.103	9.84E-05	3
CCDC167	1.97E-09	0.6752210058	0.061	0.112	0.0001116049101	3
BEX4	2.02E-09	0.9590479294	0.089	0.152	0.0001143059408	3
SYMPK	2.09E-09	0.8389632007	0.076	0.134	0.0001184765707	3
NTHL1	2.45E-09	0.6440317758	0.067	0.12	0.0001385112139	3
SKA2	2.92E-09	0.7254819514	0.059	0.109	0.000165460231	3
MRPL17	3.88E-09	0.8176261226	0.173	0.272	0.0002197172831	3
DYNLT1	4.22E-09	0.7443834899	0.254	0.401	0.00023870193	3
MAGOHB	4.84E-09	0.8298253944	0.063	0.114	0.0002739224838	3
EGFL7	6.62E-09	0.5127410391	0.614	0.741	0.0003748205476	3
MBD3	7.77E-09	0.5719918545	0.055	0.102	0.0004400854427	3
TIMM8B	9.35E-09	0.7579150714	0.21	0.33	0.0005295784567	3
SDHAF2	9.80E-09	0.8996200167	0.072	0.126	0.0005551178781	3
COL18A1	1.13E-08	0.5186356326	0.321	0.492	0.0006381785718	3
CAVIN3	1.16E-08	1.34613173	0.221	0.192	0.0006553864761	3
RIN2	1.16E-08	0.8188461849	0.106	0.171	0.0006557596006	3
LINC00998	1.35E-08	0.6857630578	0.081	0.137	0.0007629605864	3
IAH1	1.41E-08	0.6747647672	0.072	0.124	0.0007984256852	3
AFAP1L1	1.78E-08	0.738047764	0.113	0.181	0.001009380514	3
ADD3	1.90E-08	0.8589265334	0.105	0.171	0.001078746879	3
CCDC66	2.14E-08	0.6353629214	0.055	0.101	0.00120933432	3
MRPL12	2.15E-08	0.6868209024	0.066	0.115	0.001216620683	3
MCM3AP	2.42E-08	0.5795375405	0.06	0.106	0.001372970606	3
FLT1	2.44E-08	0.5622142753	0.314	0.48	0.00138391518	3
AES	2.59E-08	0.6147795131	0.221	0.336	0.001469148117	3
DNPH1	3.22E-08	0.7970177929	0.075	0.126	0.001823889825	3
COMMD3	3.55E-08	0.7696498155	0.055	0.1	0.002011512207	3
METTL261	3.73E-08	0.5691715338	0.061	0.107	0.002111188725	3
ADGRF5	5.01E-08	0.6340227982	0.19	0.286	0.002837009571	3
VKORC1	6.08E-08	0.6562712294	0.171	0.262	0.003444690122	3
SH2D3C	7.48E-08	0.8361811186	0.137	0.212	0.004238180478	3
ANGPTL2	7.71E-08	0.5979282452	0.095	0.151	0.004367486168	3
VAMP5	7.98E-08	0.6856631775	0.55	0.692	0.004516211031	3
MYL9	8.06E-08	0.7489752386	0.186	0.283	0.004562343218	3
CKLF	9.44E-08	0.7392262479	0.124	0.192	0.00534405833	3
BAX	1.02E-07	0.7982459452	0.245	0.378	0.005759566641	3
LAMTOR4	1.05E-07	0.5528776247	0.344	0.542	0.005929492757	3
OLFML2A	1.07E-07	0.7876918019	0.103	0.163	0.00606366235	3
EVA1B	1.07E-07	0.837320605	0.106	0.168	0.006080084713	3
OGA	1.25E-07	0.5736895319	0.059	0.103	0.007075046615	3
EFNB1	1.31E-07	0.7565249761	0.067	0.113	0.007426901466	3
HSBP1	1.34E-07	0.5957950339	0.335	0.524	0.007568453576	3
VWA1	1.35E-07	0.8347636764	0.45	0.516	0.007670871775	3
SHPRH	1.41E-07	0.7049570515	0.06	0.104	0.007977175689	3
MRPL41	1.43E-07	0.77134907	0.247	0.38	0.008116801581	3
SLC12A2	1.60E-07	0.8874062961	0.077	0.127	0.009050933579	3
NID1	2.33E-07	0.822949002	0.142	0.217	0.01320856198	3
PINK1	2.36E-07	0.8886387699	0.115	0.179	0.01337529877	3
AEBP1	2.97E-07	0.81935336	0.077	0.126	0.01680058273	3
NES	3.08E-07	0.8669067197	0.099	0.155	0.01746841944	3
FLT4	3.18E-07	0.5469217186	0.063	0.106	0.01802649822	3
ARHGAP18	4.43E-07	0.9420692784	0.112	0.173	0.02510821747	3
UBALD1	4.67E-07	0.9054894515	0.063	0.106	0.02645551933	3
NGFRAP1	5.00E-07	0.7255655956	0.202	0.3	0.02830858543	3
FMNL3	5.03E-07	0.8348520655	0.099	0.154	0.02850272218	3
SEC61G	5.22E-07	0.8842453002	0.465	0.569	0.02957530109	3
NOTCH4	5.61E-07	1.125973511	0.252	0.234	0.03179014195	3
COX8A	5.73E-07	0.5235846622	0.365	0.572	0.03244061514	3
PGF	5.91E-07	0.8637280619	0.08	0.128	0.03347862947	3
CNPY2	6.13E-07	0.7534767671	0.149	0.225	0.03468611824	3
GOSR2	6.54E-07	0.7925850211	0.068	0.112	0.03704078239	3
UQCR11	8.10E-07	0.5192529619	0.384	0.59	0.04589485142	3
CDH13	8.52E-07	1.505607525	0.21	0.191	0.04827166046	3
MALAT1	1.69E-120	0.8890441406	0.986	0.989	9.60E-116	4
FOSB	2.89E-116	1.414579652	0.715	0.629	1.64E-111	4
NEAT1	6.71E-103	0.8680967532	0.905	0.916	3.80E-98	4
MT-CO2	7.66E-91	0.6561253944	0.971	0.981	4.34E-86	4
HSPA1A	5.45E-89	1.058619805	0.776	0.695	3.09E-84	4
JUN	1.11E-84	0.8847868753	0.853	0.807	6.28E-80	4
IER2	6.55E-84	1.225424787	0.713	0.701	3.71E-79	4
MT-ND4	8.44E-83	0.6359142556	0.952	0.97	4.78E-78	4
HSPA1B	1.91E-81	1.262885921	0.672	0.587	1.08E-76	4
MT-ATP6	1.83E-76	0.694874771	0.94	0.964	1.04E-71	4
MT-CO3	3.44E-64	0.5860177821	0.953	0.974	1.95E-59	4
MT-CO1	5.20E-60	0.6140296793	0.967	0.98	2.94E-55	4
MT-ND3	2.11E-57	0.6318890285	0.921	0.947	1.20E-52	4
FOS1	4.68E-57	0.7309296828	0.869	0.836	2.65E-52	4
MT-ND2	6.63E-51	0.6670797168	0.909	0.949	3.76E-46	4
MT-ND5	5.11E-48	0.5946053761	0.812	0.879	2.90E-43	4
JUND	7.40E-32	1.227689251	0.606	0.637	4.19E-27	4
JUNB	1.96E-30	0.5931300616	0.862	0.859	1.11E-25	4
GADD45B	8.72E-30	1.192739623	0.595	0.597	4.94E-25	4
HNRNPUL1	9.06E-29	0.5753927614	0.137	0.293	5.13E-24	4
DNAJB1	1.33E-28	0.8663225586	0.593	0.582	7.52E-24	4
HSPA6	4.21E-25	1.972276983	0.163	0.093	2.38E-20	4
FKBP4	6.61E-23	0.6503178976	0.095	0.21	3.74E-18	4
MIR22HG1	1.14E-22	0.5011468294	0.129	0.261	6.47E-18	4
CYB5D21	1.36E-22	0.81387542	0.054	0.143	7.71E-18	4
PPP1R18	1.92E-22	0.5176758597	0.16	0.307	1.09E-17	4
CD141	2.13E-22	0.6113982549	0.045	0.129	1.20E-17	4
LTBP4	1.07E-20	0.5077282957	0.046	0.126	6.07E-16	4
NFKB2	2.37E-20	0.5372992895	0.109	0.223	1.34E-15	4
TOB2	2.94E-20	0.6249124804	0.105	0.217	1.66E-15	4
ELMSAN1	3.55E-20	0.5016392657	0.097	0.202	2.01E-15	4
TUBB2A	3.70E-20	0.541598858	0.117	0.232	2.09E-15	4
BCLAF1	7.27E-20	0.5075789468	0.242	0.424	4.12E-15	4
PPP1R15A1	6.59E-19	0.6462089092	0.646	0.696	3.73E-14	4
ARL5B1	2.46E-18	0.5054825563	0.141	0.262	1.39E-13	4
ABHD5	3.50E-18	0.5380010713	0.092	0.189	1.98E-13	4
RNF1221	5.73E-18	0.5662197944	0.046	0.119	3.24E-13	4
PURB	6.94E-18	0.5454516753	0.081	0.171	3.93E-13	4
AKAP121	7.30E-18	0.6091580536	0.072	0.157	4.13E-13	4
SUPT5H	1.35E-17	0.5042875498	0.116	0.221	7.64E-13	4
MAP2K31	1.69E-17	0.6051517171	0.129	0.241	9.59E-13	4
CDK12	1.72E-17	0.5774736215	0.097	0.194	9.75E-13	4
REL1	1.80E-17	0.5717875262	0.182	0.32	1.02E-12	4
MKNK2	2.95E-17	0.6475537057	0.145	0.267	1.67E-12	4
PABPC4	3.32E-17	0.635636628	0.118	0.225	1.88E-12	4
ATN1	3.59E-17	0.6303023454	0.136	0.253	2.03E-12	4
CHD2	4.21E-17	0.518172228	0.139	0.253	2.38E-12	4
WDR26	5.48E-17	0.5691208403	0.098	0.193	3.10E-12	4
MAFF1	8.25E-17	0.5225108349	0.222	0.379	4.67E-12	4
HSP90AA1	1.75E-16	0.5160892526	0.771	0.836	9.92E-12	4
NUDT4	2.13E-16	0.5422202279	0.101	0.195	1.20E-11	4
IDI1	2.14E-16	0.6368661599	0.11	0.209	1.21E-11	4
HSPH1	2.74E-16	1.194170985	0.441	0.448	1.55E-11	4
CYLD	2.82E-16	0.5114864837	0.071	0.151	1.59E-11	4
AAK1	4.16E-16	0.5734904757	0.094	0.184	2.35E-11	4
EFNA1	4.65E-16	0.54121117	0.218	0.369	2.64E-11	4
LAMA5	5.34E-16	0.5862778253	0.206	0.353	3.02E-11	4
WAC	7.26E-16	0.5001031473	0.202	0.347	4.11E-11	4
YPEL3	1.02E-15	0.5088657928	0.122	0.224	5.76E-11	4
HSPA2	1.15E-15	0.6518588265	0.125	0.23	6.51E-11	4
FPGS	1.42E-15	0.5149773848	0.055	0.125	8.06E-11	4
MYLIP	1.70E-15	0.6617423394	0.164	0.288	9.61E-11	4
PTBP1	2.06E-15	0.5462316023	0.217	0.368	1.17E-10	4
CITED21	2.16E-15	0.554854757	0.145	0.258	1.22E-10	4
HECA	2.44E-15	0.5137140553	0.066	0.14	1.38E-10	4
HNRNPL	3.05E-15	0.618010984	0.145	0.259	1.73E-10	4
NR4A11	3.11E-15	0.9361428633	0.477	0.489	1.76E-10	4
FAM91A1	3.16E-15	0.5632642395	0.092	0.178	1.79E-10	4
SMC4	3.78E-15	0.5305240221	0.07	0.146	2.14E-10	4
TNRC6B	5.07E-15	0.5007372462	0.213	0.358	2.87E-10	4
NFKBIB	5.73E-15	0.5763618381	0.089	0.174	3.25E-10	4
ANKRD10	5.96E-15	0.5332904217	0.228	0.381	3.37E-10	4
KIAA2026	6.44E-15	0.5577875682	0.082	0.162	3.65E-10	4
ZBTB7A	6.56E-15	0.5951213584	0.124	0.224	3.72E-10	4
GSE1	6.57E-15	0.5269077948	0.072	0.148	3.72E-10	4
TRIB11	8.27E-15	0.5197894607	0.196	0.329	4.68E-10	4
NAPRT	8.34E-15	0.5105218742	0.097	0.183	4.72E-10	4
USP15	9.51E-15	0.6145632947	0.112	0.206	5.39E-10	4
MAP3K2	1.04E-14	0.516771257	0.088	0.17	5.91E-10	4
FAM53C	1.08E-14	0.7201158156	0.068	0.142	6.11E-10	4
YY1AP1	1.20E-14	0.5669924393	0.062	0.132	6.82E-10	4
C6orf62	1.28E-14	0.5576745703	0.179	0.305	7.26E-10	4
HELZ	1.45E-14	0.5561256876	0.078	0.155	8.20E-10	4
LTBP3	1.47E-14	0.501152371	0.135	0.238	8.32E-10	4
PER1	1.61E-14	0.510232301	0.122	0.22	9.12E-10	4
TMEM41A	1.63E-14	0.5174892904	0.051	0.116	9.24E-10	4
NFAT5	2.12E-14	0.5292779556	0.191	0.32	1.20E-09	4
ZNF451	2.42E-14	0.5496499415	0.091	0.175	1.37E-09	4
PIK3R3	3.11E-14	0.6535185106	0.194	0.326	1.76E-09	4
PELI1	3.20E-14	0.6030387819	0.173	0.294	1.81E-09	4
KAT6A	4.43E-14	0.5551731256	0.128	0.227	2.51E-09	4
EPC1	4.47E-14	0.5949193992	0.196	0.328	2.53E-09	4
CREBRF	5.47E-14	0.5132777093	0.147	0.254	3.10E-09	4
IRF3	6.76E-14	0.5579200016	0.108	0.197	3.83E-09	4
TRIM28	7.56E-14	0.5918964604	0.141	0.245	4.28E-09	4
PTPRK	7.77E-14	0.5702763267	0.184	0.309	4.40E-09	4
CAND1	8.48E-14	0.6252676232	0.121	0.216	4.80E-09	4
NCOR2	8.81E-14	0.5086054234	0.078	0.153	4.99E-09	4
CPEB4	8.92E-14	0.5823814459	0.105	0.192	5.05E-09	4
UBXN2A	9.42E-14	0.5039142758	0.061	0.128	5.34E-09	4
IL4R	9.93E-14	0.5117940121	0.133	0.232	5.62E-09	4
PLXNB2	1.05E-13	0.5502707061	0.095	0.177	5.95E-09	4
THBD1	1.05E-13	0.5056999514	0.298	0.47	5.97E-09	4
ATXN2L	1.11E-13	0.588802002	0.102	0.188	6.29E-09	4
NOL10	1.15E-13	0.5077101438	0.043	0.1	6.53E-09	4
PCF11	1.29E-13	0.5469315518	0.151	0.258	7.31E-09	4
SMCHD1	1.32E-13	0.5390888057	0.127	0.223	7.46E-09	4
HES1	1.50E-13	1.578994356	0.455	0.466	8.48E-09	4
MINK1	1.51E-13	0.5578492318	0.086	0.165	8.57E-09	4
SOS2	2.02E-13	0.5077698257	0.043	0.1	1.14E-08	4
SSH11	2.46E-13	0.6839372674	0.144	0.245	1.39E-08	4
RNF40	2.57E-13	0.5124105836	0.05	0.11	1.46E-08	4
DAPK3	2.67E-13	0.5089798942	0.121	0.213	1.51E-08	4
MARK3	3.15E-13	0.5290708224	0.096	0.176	1.78E-08	4
BTBD7	3.32E-13	0.6257311341	0.11	0.196	1.88E-08	4
ADPGK	3.38E-13	0.5470136947	0.055	0.117	1.91E-08	4
RSRC2	3.65E-13	0.5827575476	0.268	0.438	2.07E-08	4
RLF	3.71E-13	0.6902111302	0.071	0.14	2.10E-08	4
PPP1R15B1	3.94E-13	0.6176378502	0.13	0.225	2.23E-08	4
SDE2	4.17E-13	0.5507413866	0.071	0.141	2.36E-08	4
IL17RA	4.50E-13	0.5313221818	0.048	0.106	2.55E-08	4
RC3H1	4.83E-13	0.607720829	0.094	0.174	2.73E-08	4
CCNK	6.73E-13	0.5794375905	0.066	0.133	3.81E-08	4
VPS37B	7.20E-13	0.6798459258	0.103	0.186	4.08E-08	4
PACS1	7.33E-13	0.5573237881	0.063	0.128	4.15E-08	4
NARF	7.74E-13	0.7926849083	0.197	0.33	4.38E-08	4
PACS2	1.08E-12	0.5046503013	0.071	0.139	6.11E-08	4
STAT2	1.09E-12	0.5543941895	0.085	0.158	6.17E-08	4
ACIN1	1.21E-12	0.5106894126	0.135	0.23	6.88E-08	4
HSPB1	1.35E-12	0.72113953	0.737	0.854	7.64E-08	4
ZNF281	1.76E-12	0.5810705307	0.113	0.199	9.96E-08	4
TBC1D9	1.87E-12	0.5381148547	0.068	0.134	1.06E-07	4
LAMB2	2.18E-12	0.5101703354	0.213	0.346	1.23E-07	4
PGS1	2.22E-12	0.5595209409	0.072	0.139	1.26E-07	4
DEDD2	2.27E-12	0.7015227324	0.06	0.122	1.29E-07	4
NCOA3	2.33E-12	0.5012692092	0.091	0.166	1.32E-07	4
CIC	2.40E-12	0.6419022674	0.062	0.125	1.36E-07	4
SMG1	2.42E-12	0.5728302693	0.162	0.269	1.37E-07	4
PHTF1	2.73E-12	0.6151956078	0.054	0.113	1.55E-07	4
SEMA4C	2.97E-12	0.7651977963	0.066	0.13	1.68E-07	4
SH3D19	3.05E-12	0.5366250711	0.048	0.103	1.73E-07	4
KRT81	3.30E-12	0.5530745754	0.07	0.135	1.87E-07	4
C16orf72	3.68E-12	0.5122970651	0.113	0.197	2.09E-07	4
PI4KB	3.78E-12	0.7038673619	0.06	0.121	2.14E-07	4
GPBP1	3.87E-12	0.5122305472	0.229	0.366	2.19E-07	4
SAMD8	3.92E-12	0.5626192804	0.055	0.114	2.22E-07	4
ZNF358	4.46E-12	0.5586343532	0.062	0.123	2.53E-07	4
THUMPD3-AS1	4.67E-12	0.6198409559	0.127	0.217	2.64E-07	4
ICAM41	4.82E-12	0.7104158152	0.079	0.149	2.73E-07	4
PXDC1	5.31E-12	0.6988671936	0.059	0.119	3.01E-07	4
ZFC3H1	5.34E-12	0.5463644798	0.082	0.152	3.03E-07	4
EP300	5.37E-12	0.6009701133	0.086	0.158	3.04E-07	4
CNTNAP3B	6.08E-12	0.5352232672	0.133	0.225	3.44E-07	4
AMD11	7.65E-12	0.7928545266	0.164	0.274	4.33E-07	4
TMEM259	8.16E-12	0.5992297765	0.165	0.272	4.62E-07	4
EGR11	8.45E-12	0.8546230366	0.489	0.499	4.79E-07	4
EDEM3	8.60E-12	0.5311880581	0.083	0.153	4.87E-07	4
UHRF2	9.87E-12	0.5443705807	0.102	0.179	5.59E-07	4
MAPK11	1.06E-11	0.7056168714	0.12	0.206	6.01E-07	4
MAN2A1	1.09E-11	0.5263002724	0.057	0.115	6.17E-07	4
FBRS	1.17E-11	0.5629069609	0.064	0.125	6.62E-07	4
ADM1	1.22E-11	1.981606783	0.196	0.154	6.92E-07	4
ATP13A3	1.35E-11	0.6602030505	0.048	0.102	7.63E-07	4
ARHGEF1	1.37E-11	0.654591188	0.12	0.205	7.74E-07	4
SAMD1	1.61E-11	0.5154925955	0.05	0.105	9.11E-07	4
UBA6	1.63E-11	0.5357579923	0.105	0.183	9.22E-07	4
SCML1	1.76E-11	0.7605679716	0.091	0.164	9.98E-07	4
TRIM25	1.81E-11	0.742644023	0.091	0.164	1.02E-06	4
GPAT4	2.02E-11	0.5503342318	0.067	0.128	1.14E-06	4
HSPG21	2.02E-11	0.5997365245	0.677	0.824	1.15E-06	4
PRRC2B	2.06E-11	0.5966078882	0.166	0.271	1.17E-06	4
CDK5RAP3	2.07E-11	0.6099783244	0.123	0.21	1.17E-06	4
CEP170	2.20E-11	0.5418109278	0.117	0.199	1.25E-06	4
CLN8	2.25E-11	0.5104624798	0.074	0.137	1.27E-06	4
AHI1	2.32E-11	0.6276387733	0.119	0.203	1.31E-06	4
MAFG	2.34E-11	0.7153580372	0.086	0.156	1.33E-06	4
SLC25A441	2.40E-11	0.7408036215	0.058	0.116	1.36E-06	4
GTF3C5	2.59E-11	0.6194787408	0.052	0.107	1.46E-06	4
CTR9	3.04E-11	0.774867839	0.091	0.162	1.72E-06	4
MDM2	3.12E-11	0.5047362135	0.05	0.103	1.77E-06	4
HID1	3.45E-11	0.5507816014	0.053	0.108	1.96E-06	4
PLD2	3.98E-11	0.6196152681	0.049	0.102	2.26E-06	4
STAB1	4.32E-11	0.5273453246	0.223	0.355	2.45E-06	4
PGM2L1	5.27E-11	0.6437689169	0.139	0.229	2.98E-06	4
NOP56	6.66E-11	0.800863741	0.154	0.253	3.77E-06	4
SAMD4A	6.81E-11	0.5620666162	0.079	0.144	3.85E-06	4
IQSEC1	6.82E-11	0.5199255823	0.068	0.128	3.86E-06	4
WDR74	7.85E-11	0.6480865184	0.075	0.138	4.44E-06	4
PIEZO1	7.95E-11	0.5286663841	0.132	0.219	4.50E-06	4
LDLR	8.16E-11	0.673486332	0.182	0.291	4.62E-06	4
NFATC1	8.28E-11	0.7766387104	0.109	0.186	4.69E-06	4
NAB1	8.31E-11	0.5656227603	0.061	0.118	4.71E-06	4
ZBTB10	1.10E-10	0.6945571381	0.109	0.185	6.24E-06	4
PANK3	1.15E-10	0.6541983715	0.055	0.109	6.49E-06	4
PPP2R1B	1.16E-10	0.6526333382	0.059	0.114	6.59E-06	4
FAM43A	1.26E-10	0.7892542835	0.158	0.255	7.13E-06	4
AKAP8L	1.28E-10	0.5970252714	0.056	0.11	7.24E-06	4
YPEL2	1.30E-10	0.571310588	0.265	0.415	7.34E-06	4
SCAMP4	1.31E-10	0.6848904223	0.066	0.124	7.41E-06	4
HOTAIRM1	1.39E-10	0.5920383051	0.112	0.188	7.87E-06	4
MYO61	1.43E-10	0.5022974958	0.139	0.226	8.10E-06	4
CSNK1G21	1.43E-10	0.5289348958	0.071	0.131	8.12E-06	4
C12orf65	1.52E-10	0.5251170864	0.049	0.1	8.58E-06	4
ZBTB16	1.86E-10	0.5048853735	0.084	0.149	1.05E-05	4
HERC1	2.15E-10	0.5743731163	0.125	0.205	1.22E-05	4
DDX39B	2.18E-10	0.6313150547	0.12	0.2	1.24E-05	4
PCGF3	2.86E-10	0.6111896072	0.091	0.159	1.62E-05	4
UBALD21	3.14E-10	0.5438165943	0.107	0.18	1.78E-05	4
AKAP17A	3.36E-10	0.5633449894	0.094	0.161	1.90E-05	4
RAPGEF11	3.49E-10	0.6897307928	0.091	0.159	1.98E-05	4
GGA11	3.74E-10	0.510317817	0.066	0.122	2.12E-05	4
BRAF	3.82E-10	0.5070977227	0.061	0.115	2.16E-05	4
RNF103	4.00E-10	0.547938497	0.061	0.115	2.27E-05	4
TBC1D17	4.11E-10	0.6293765612	0.058	0.11	2.33E-05	4
SCAF4	4.14E-10	0.6464625752	0.066	0.123	2.35E-05	4
HMBOX1	4.36E-10	0.5430368938	0.09	0.156	2.47E-05	4
TECPR1	4.56E-10	0.5083888255	0.091	0.157	2.58E-05	4
HGS	4.87E-10	0.5334752203	0.101	0.17	2.76E-05	4
DMAP1	5.14E-10	0.5028141357	0.058	0.111	2.91E-05	4
IRF2BPL	5.28E-10	0.7310459973	0.129	0.211	2.99E-05	4
RIMKLB	5.36E-10	0.7276190951	0.077	0.137	3.03E-05	4
JMJD6	6.14E-10	0.8261188609	0.103	0.175	3.47E-05	4
PRPF3	6.25E-10	0.5462895353	0.057	0.109	3.54E-05	4
CREBZF	7.53E-10	0.591747267	0.072	0.13	4.27E-05	4
SLC25A37	7.55E-10	0.5807060705	0.191	0.299	4.28E-05	4
INO80D	8.88E-10	0.730716011	0.069	0.125	5.03E-05	4
ARHGAP21	9.27E-10	0.520014678	0.077	0.136	5.25E-05	4
MAPK6	1.05E-09	0.5707629517	0.053	0.103	5.96E-05	4
ZC3HAV1	1.08E-09	0.8076212757	0.2	0.312	6.11E-05	4
PBX2	1.12E-09	0.5531957631	0.07	0.127	6.34E-05	4
TAOK2	1.16E-09	0.7196718982	0.128	0.209	6.54E-05	4
PIM11	1.24E-09	0.8843433197	0.071	0.128	7.04E-05	4
LARP4B	1.26E-09	0.502453385	0.062	0.115	7.15E-05	4
PIP4K2B	1.31E-09	0.5310761345	0.055	0.104	7.44E-05	4
SLC41A1	1.46E-09	0.7707973861	0.067	0.122	8.28E-05	4
HTT	1.58E-09	0.5719320928	0.052	0.101	8.97E-05	4
ANGPT2	1.74E-09	0.7776503841	0.145	0.228	9.84E-05	4
INF2	1.76E-09	0.5834730827	0.106	0.176	9.98E-05	4
RNF44	2.28E-09	0.6346947099	0.07	0.124	0.000129334924	4
HIVEP21	2.89E-09	0.6543553925	0.053	0.101	0.0001638895297	4
RREB1	3.29E-09	0.6695434708	0.07	0.125	0.0001860806389	4
GABPB1-AS1	3.38E-09	0.6347793586	0.087	0.147	0.000191493199	4
TLE3	3.56E-09	0.7240851541	0.094	0.157	0.0002013752291	4
KDM2A	3.82E-09	0.813710694	0.147	0.235	0.0002163253358	4
LUC7L	4.05E-09	0.6783543253	0.157	0.249	0.0002295506162	4
C3orf58	4.07E-09	0.563786436	0.054	0.102	0.0002303997566	4
DYRK1A	4.11E-09	0.6624013208	0.078	0.135	0.0002328780121	4
ARID1B	4.60E-09	0.6447273056	0.137	0.218	0.0002605757534	4
WDR60	4.78E-09	0.5924047698	0.129	0.205	0.0002707167866	4
GAK	5.13E-09	0.7081547692	0.099	0.165	0.0002902623363	4
YME1L1	5.35E-09	0.8824508155	0.225	0.351	0.0003032015496	4
TRIO	5.58E-09	0.5509880093	0.098	0.163	0.0003158396921	4
CHMP1B	5.88E-09	0.9383562572	0.178	0.278	0.0003330443476	4
H2AFX1	6.10E-09	0.8560994657	0.166	0.261	0.0003455597627	4
SRSF6	6.17E-09	0.6761464155	0.118	0.191	0.0003495894503	4
ANKH	6.26E-09	0.6810784426	0.059	0.108	0.0003545228499	4
TAZ	6.27E-09	0.5373437394	0.069	0.122	0.0003550811353	4
RP11-138A9.11	6.35E-09	0.5456074798	0.057	0.105	0.0003595080953	4
AC020916.1	6.40E-09	1.985014751	0.123	0.089	0.0003626983784	4
MAPK12	6.78E-09	0.663886396	0.077	0.133	0.0003840607323	4
PMAIP1	6.86E-09	0.6803376666	0.127	0.201	0.0003882509105	4
FAM160B1	7.11E-09	0.5921969472	0.071	0.125	0.0004023634788	4
RRP121	8.17E-09	0.7152909826	0.072	0.126	0.000462490073	4
EML3	8.77E-09	0.6329720931	0.114	0.183	0.0004965563729	4
UBXN7	8.99E-09	0.6954512308	0.07	0.122	0.0005090813032	4
PSME4	9.16E-09	0.6908761507	0.066	0.117	0.0005184494204	4
AFF4	1.00E-08	0.6621688478	0.25	0.388	0.0005687938539	4
LENG8	1.00E-08	0.587164249	0.146	0.227	0.0005688184773	4
JMJD1C	1.14E-08	0.5602734403	0.335	0.51	0.0006438012839	4
MDM4	1.44E-08	0.5121979519	0.122	0.193	0.000816625661	4
AKAP8	2.22E-08	0.6632650111	0.062	0.11	0.00125798902	4
TCIRG1	2.35E-08	0.8704306053	0.112	0.18	0.00133139922	4
ING1	2.90E-08	0.717831132	0.066	0.115	0.001643760133	4
CDKN2AIP	3.07E-08	0.7727079019	0.079	0.133	0.001737724072	4
BTN2A1	3.21E-08	0.6512567158	0.055	0.1	0.001816572313	4
CHORDC1	3.25E-08	0.812869952	0.152	0.236	0.001838054078	4
KMT2D	3.75E-08	0.6090618666	0.06	0.106	0.002120765079	4
PDE4D	3.75E-08	0.5696460198	0.121	0.189	0.002125770769	4
CYBA1	3.77E-08	0.578502492	0.184	0.278	0.002135390935	4
KDM3A	4.14E-08	0.6328371507	0.059	0.105	0.002342947539	4
PDE4B	4.22E-08	0.515851669	0.093	0.15	0.002388420971	4
PNKP	4.29E-08	0.6219468181	0.104	0.167	0.002428806567	4
DUSP6	4.40E-08	0.503336032	0.3	0.439	0.002494079446	4
ZCCHC11	4.49E-08	0.5073260435	0.073	0.124	0.002539892	4
CFAP20	4.72E-08	0.8512078129	0.158	0.242	0.002672173064	4
ARRDC2	5.30E-08	0.8144998736	0.097	0.157	0.003003720051	4
CEBPB	5.78E-08	0.8152432045	0.076	0.128	0.003274901419	4
KLF6	6.54E-08	0.6832915442	0.642	0.747	0.00370094195	4
ZNF160	6.76E-08	0.6262359024	0.066	0.113	0.003825422256	4
RGS12	6.97E-08	0.6748659129	0.09	0.147	0.003949681109	4
SMAD7	7.50E-08	0.6598786434	0.059	0.104	0.004245342146	4
ACOX1	7.91E-08	0.8370202418	0.057	0.101	0.004481031005	4
TSC22D4	8.40E-08	0.8675375909	0.063	0.109	0.004757457571	4
TAF1D	8.69E-08	0.6395335265	0.276	0.421	0.004918724172	4
TRMT1	8.69E-08	0.7031382039	0.075	0.125	0.004922701023	4
TSC22D21	8.81E-08	0.8396949104	0.169	0.257	0.00498963651	4
MAGI1	9.10E-08	0.5917609219	0.183	0.275	0.005155647599	4
MON2	9.18E-08	0.6524876434	0.074	0.124	0.005201251713	4
SHANK3	1.07E-07	0.5956663756	0.167	0.252	0.006086308242	4
CTD-3252C9.4	1.15E-07	0.7853472098	0.116	0.178	0.006484853435	4
HDAC7	1.19E-07	0.5152816956	0.266	0.397	0.006751014285	4
FAM126B	1.53E-07	0.8284617361	0.06	0.104	0.008657610806	4
SRGAP2C	1.58E-07	0.5168374136	0.068	0.114	0.008963944791	4
SEMA4A1	1.64E-07	1.100917667	0.064	0.11	0.00927128746	4
FNIP1	1.67E-07	0.7532391128	0.113	0.177	0.009483064948	4
ZZEF1	1.75E-07	0.7872764886	0.065	0.111	0.009926377322	4
NUFIP2	1.81E-07	0.7934636734	0.202	0.305	0.01026564882	4
TNFAIP2	1.89E-07	0.7163465759	0.174	0.259	0.01071271282	4
KDM6B1	2.19E-07	0.6960895771	0.223	0.33	0.01238064011	4
PEAR1	2.29E-07	0.6656334806	0.077	0.126	0.01294136266	4
BAG31	2.30E-07	0.5758557065	0.305	0.451	0.01300816005	4
DLL1	2.35E-07	0.8180267886	0.094	0.149	0.01332720865	4
GATA2	2.69E-07	0.968518535	0.128	0.196	0.01524050498	4
GRB101	2.72E-07	0.6070314312	0.176	0.261	0.01540631907	4
ADARB1	2.75E-07	0.5195457141	0.072	0.119	0.01556465706	4
AFDN	2.94E-07	0.5092182123	0.064	0.108	0.01667133637	4
FAM133B	3.20E-07	0.7670461474	0.209	0.314	0.01810912684	4
EGFL71	3.35E-07	0.5702329922	0.62	0.741	0.01894399418	4
CLASRP	3.90E-07	0.785867615	0.077	0.126	0.02210796075	4
RAPGEF3	4.56E-07	0.7898067158	0.192	0.288	0.02581543945	4
SPRY1	4.70E-07	0.7233500067	0.578	0.653	0.0266262727	4
ITPRIPL2	5.05E-07	0.7115719068	0.078	0.126	0.0286006471	4
PPP1R12C1	5.46E-07	0.8033728324	0.063	0.106	0.0309003332	4
MAN2C1	6.43E-07	0.7215363316	0.099	0.154	0.03641074138	4
IRF9	6.75E-07	0.8973115341	0.078	0.126	0.03824556707	4
KAT2A1	6.84E-07	0.536741525	0.066	0.108	0.03871169192	4
ITPRIP	7.59E-07	0.7776667954	0.183	0.272	0.04299284701	4
SRSF7	8.33E-07	0.5960660541	0.357	0.534	0.047167545	4
NLRC5	8.48E-07	0.5019141315	0.069	0.113	0.0480369576	4
HIST1H2AC	8.66E-07	1.059496558	0.066	0.109	0.04904471909	4
NFKBIA1	5.03E-170	0.9704402219	0.974	0.785	2.85E-165	5
IRF11	1.31E-152	1.176588943	0.78	0.51	7.41E-148	5
ICAM11	3.76E-150	1.000704104	0.872	0.609	2.13E-145	5
DNAJA11	2.06E-147	1.001986558	0.877	0.692	1.17E-142	5
TNFAIP31	2.42E-143	1.491464425	0.674	0.397	1.37E-138	5
IER31	7.64E-141	1.246148321	0.832	0.596	4.33E-136	5
CDKN1A1	1.29E-132	0.9055343519	0.861	0.593	7.29E-128	5
CCL21	3.14E-132	1.450596909	0.604	0.326	1.78E-127	5
PPP1R15A2	4.28E-126	0.9239272191	0.869	0.681	2.42E-121	5
HSPH11	1.29E-119	1.300480848	0.655	0.435	7.30E-115	5
DNAJB11	7.80E-113	1.240080846	0.765	0.572	4.42E-108	5
C2CD4B1	2.28E-109	1.537392769	0.558	0.319	1.29E-104	5
SOD21	2.96E-107	1.040501239	0.738	0.507	1.68E-102	5
HSP90AA11	4.92E-107	0.845212364	0.933	0.825	2.78E-102	5
SELE1	1.55E-105	1.143161349	0.763	0.533	8.80E-101	5
TM4SF11	5.43E-105	0.8751058036	0.917	0.791	3.07E-100	5
EGR12	7.73E-96	1.173798071	0.697	0.486	4.38E-91	5
H3F3B	1.20E-94	0.6009062718	0.977	0.914	6.81E-90	5
MAFF2	1.23E-93	1.421302748	0.554	0.357	6.98E-89	5
SOCS31	4.37E-92	0.8564817114	0.88	0.713	2.47E-87	5
FOSB1	7.22E-92	0.9880955844	0.799	0.625	4.09E-87	5
GADD45B1	3.52E-91	1.281014076	0.763	0.586	2.00E-86	5
ATF32	9.95E-89	1.125852382	0.65	0.449	5.64E-84	5
KLF41	1.05E-88	1.012009551	0.733	0.546	5.93E-84	5
HSP90AB1	1.75E-88	0.6546303578	0.932	0.839	9.92E-84	5
EIF1	9.65E-88	0.5001018258	0.979	0.922	5.46E-83	5
HSPA1A1	8.95E-84	0.9522854477	0.849	0.692	5.07E-79	5
KDM6B2	4.61E-78	1.248201623	0.499	0.311	2.61E-73	5
SERTAD11	2.47E-73	0.9875431795	0.674	0.516	1.40E-68	5
CEBPD1	4.70E-73	1.095433484	0.63	0.437	2.66E-68	5
DNAJB4	5.17E-68	1.147539129	0.582	0.428	2.93E-63	5
HSPA81	6.48E-64	0.6430878303	0.875	0.744	3.67E-59	5
EMP11	6.90E-64	0.7180855106	0.823	0.692	3.91E-59	5
SNHG292	5.11E-63	1.14337809	0.289	0.129	2.90E-58	5
IER51	1.58E-62	1.318799735	0.428	0.265	8.96E-58	5
CCL143	4.32E-62	0.6534771261	0.704	0.504	2.45E-57	5
HSPD11	1.14E-61	1.030940352	0.651	0.527	6.44E-57	5
HSPA1B1	2.36E-61	0.9084450555	0.728	0.585	1.34E-56	5
NFKBIZ1	5.94E-61	0.7881826071	0.676	0.519	3.36E-56	5
CSRNP11	2.93E-60	1.02113539	0.548	0.396	1.66E-55	5
MCL1	7.22E-60	0.7322544006	0.731	0.609	4.09E-55	5
UBC	5.28E-59	0.5058433151	0.954	0.891	2.99E-54	5
1-6월	6.91E-59	0.6134471744	0.908	0.804	3.92E-54	5
PMAIP11	8.22E-59	1.581780196	0.338	0.187	4.66E-54	5
GAS52	3.24E-58	1.443455048	0.243	0.106	1.83E-53	5
SLC2A32	4.50E-57	0.6409749274	0.81	0.665	2.55E-52	5
SAT11	9.32E-57	0.5842899469	0.871	0.753	5.28E-52	5
NR4A12	1.03E-56	0.8787840328	0.636	0.48	5.81E-52	5
PHLDA11	1.00E-55	1.09514025	0.531	0.376	5.66E-51	5
JUNB1	1.93E-55	0.6044966585	0.935	0.854	1.09E-50	5
RND11	6.87E-55	0.9425639987	0.534	0.367	3.89E-50	5
ZFP361	1.59E-54	0.6834973182	0.925	0.804	9.03E-50	5
IL61	3.21E-52	1.190432105	0.396	0.236	1.82E-47	5
BRD2	7.38E-52	0.8150828738	0.622	0.499	4.18E-47	5
ICAM42	3.22E-51	1.654266747	0.267	0.136	1.83E-46	5
CCNL11	4.90E-51	0.6741488454	0.719	0.609	2.77E-46	5
JUND1	9.08E-51	0.6954439838	0.758	0.627	5.14E-46	5
SQSTM1	9.92E-51	0.7012401205	0.751	0.63	5.61E-46	5
KLF101	1.83E-50	1.016853821	0.541	0.412	1.04E-45	5
BAG32	2.89E-50	0.9985555295	0.56	0.433	1.64E-45	5
MIDN1	7.14E-48	0.7904006645	0.589	0.461	4.04E-43	5
BTG21	5.88E-47	0.8469646813	0.587	0.452	3.33E-42	5
SNHG52	8.57E-47	1.196721973	0.23	0.106	4.86E-42	5
ZFAS1	2.23E-46	0.6804477647	0.709	0.61	1.26E-41	5
EIF5	8.40E-46	0.778088189	0.618	0.508	4.76E-41	5
TRIB12	3.87E-45	1.174681447	0.444	0.312	2.19E-40	5
RSRP1	6.45E-44	0.7565650007	0.609	0.503	3.65E-39	5
RCAN11	6.89E-44	0.8921028331	0.592	0.446	3.90E-39	5
HSPE1	9.10E-44	0.8586193098	0.675	0.603	5.15E-39	5
BHLHE40	4.91E-43	0.7881525821	0.632	0.514	2.78E-38	5
MAP3K81	8.11E-43	0.9871268795	0.501	0.383	4.59E-38	5
RPL171	1.55E-42	0.5239369464	0.824	0.695	8.78E-38	5
NCOA71	2.57E-42	0.6417954483	0.704	0.579	1.46E-37	5
INSIG11	4.73E-42	1.010578494	0.467	0.327	2.68E-37	5
ADAMTS41	9.02E-42	1.168481845	0.402	0.269	5.11E-37	5
H2AFX2	1.26E-41	1.310610111	0.368	0.247	7.14E-37	5
BIRC31	3.39E-41	1.360845557	0.373	0.245	1.92E-36	5
CXCL21	3.76E-41	1.240380857	0.438	0.29	2.13E-36	5
DUSP51	6.02E-41	1.195813237	0.385	0.26	3.41E-36	5
TIFA1	4.10E-40	1.414938117	0.321	0.202	2.32E-35	5
PALM2-AKAP21	4.86E-40	1.307002082	0.199	0.092	2.75E-35	5
SNHG61	8.37E-40	1.230000879	0.212	0.102	4.74E-35	5
DDIT31	4.62E-39	1.438938755	0.267	0.151	2.62E-34	5
H2AFZ	3.00E-38	0.6052350443	0.741	0.655	1.70E-33	5
MT2A1	4.29E-38	0.7749156215	0.707	0.586	2.43E-33	5
ZC3H12A1	4.44E-38	1.270714365	0.352	0.235	2.52E-33	5
MIR222HG1	2.03E-37	1.609082495	0.27	0.159	1.15E-32	5
THBD2	2.29E-37	0.7923467052	0.568	0.451	1.30E-32	5
C11orf961	3.96E-37	1.290297096	0.275	0.16	2.24E-32	5
CCN21	2.02E-36	1.051520652	0.175	0.078	1.14E-31	5
AMD12	3.20E-36	1.205542239	0.374	0.259	1.81E-31	5
CNKSR31	3.99E-36	1.099867558	0.441	0.33	2.26E-31	5
HSPA61	6.50E-36	1.649575684	0.192	0.093	3.68E-31	5
YBX31	1.42E-35	0.5225227316	0.774	0.67	8.04E-31	5
EGR31	2.12E-35	1.402356042	0.249	0.142	1.20E-30	5
NR4A22	2.45E-35	0.9539381107	0.42	0.299	1.39E-30	5
ZFAND2A1	9.83E-35	1.385204106	0.3	0.188	5.57E-30	5
CKS2	2.22E-34	1.279221558	0.34	0.231	1.26E-29	5
TUBB4B1	1.06E-33	0.7216718573	0.598	0.509	6.02E-29	5
MAP1LC3B1	2.08E-33	0.6003449433	0.651	0.569	1.18E-28	5
UBE2S1	4.15E-33	1.246422654	0.291	0.184	2.35E-28	5
HES11	1.19E-31	0.8633109959	0.565	0.459	6.71E-27	5
KMT2E	1.82E-31	0.7395505433	0.6	0.525	1.03E-26	5
MYC1	2.15E-31	0.9142279506	0.47	0.354	1.22E-26	5
TMEM701	4.65E-31	1.34218748	0.402	0.307	2.63E-26	5
EIF4A1	5.09E-31	0.7137601868	0.603	0.519	2.88E-26	5
ZFAND51	2.69E-30	0.5602772837	0.651	0.565	1.52E-25	5
TIPARP1	2.76E-30	1.381102693	0.283	0.183	1.56E-25	5
REL2	2.41E-28	0.9693442747	0.4	0.305	1.36E-23	5
VMP1	3.06E-28	0.7513216467	0.551	0.468	1.73E-23	5
TNFRSF10D	5.02E-28	0.9002401091	0.425	0.33	2.84E-23	5
ZNF2671	1.14E-27	1.236137255	0.318	0.224	6.45E-23	5
SPAG9	1.84E-27	0.825840739	0.485	0.403	1.04E-22	5
DNAJB6	1.93E-27	0.6831099762	0.551	0.487	1.09E-22	5
TSC22D22	2.15E-27	1.029331591	0.341	0.245	1.21E-22	5
LRG11	5.51E-27	1.809229864	0.195	0.111	3.12E-22	5
EEF1G1	8.86E-27	0.519924544	0.578	0.444	5.02E-22	5
ARL5B2	9.41E-27	1.085129439	0.343	0.248	5.33E-22	5
SNHG8	1.23E-26	0.6374433633	0.577	0.511	6.99E-22	5
HMOX11	1.86E-26	2.270787163	0.203	0.118	1.05E-21	5
SLC38A2	3.72E-26	0.5600030408	0.631	0.548	2.10E-21	5
ATF4	4.99E-26	0.5943664934	0.594	0.528	2.82E-21	5
GADD45A1	9.38E-26	1.04320519	0.385	0.293	5.31E-21	5
ATP1A11	7.89E-25	0.5397909682	0.643	0.577	4.47E-20	5
NUFIP21	1.04E-24	0.8725197253	0.384	0.293	5.88E-20	5
ADAMTS11	1.71E-24	0.7097115111	0.527	0.427	9.66E-20	5
MAT2A1	1.75E-24	0.8257152478	0.414	0.325	9.92E-20	5
CLK11	1.82E-24	0.6874433508	0.482	0.41	1.03E-19	5
TXN	3.02E-24	0.6594367071	0.729	0.677	1.71E-19	5
FOSL11	5.47E-24	1.360779997	0.237	0.151	3.10E-19	5
SLC25A251	9.53E-24	1.005113249	0.346	0.258	5.39E-19	5
YPEL21	3.41E-23	0.7937189586	0.475	0.4	1.93E-18	5
KLF61	2.00E-22	0.5739162683	0.797	0.736	1.13E-17	5
CD83	3.19E-22	1.417901688	0.143	0.075	1.81E-17	5
PPP1R15B2	9.39E-22	1.121463564	0.294	0.214	5.32E-17	5
SOX71	1.00E-21	0.9424580128	0.354	0.269	5.67E-17	5
UGCG1	1.30E-21	0.6643449828	0.522	0.45	7.38E-17	5
RGS161	1.61E-21	0.8469963092	0.451	0.359	9.10E-17	5
PNP1	1.79E-21	0.5374357451	0.545	0.463	1.01E-16	5
SRSF21	3.68E-21	0.5364129951	0.593	0.548	2.08E-16	5
AC020916.11	4.66E-21	1.008459437	0.159	0.087	2.64E-16	5
TNFRSF10B1	4.90E-21	0.9927625422	0.367	0.294	2.77E-16	5
HEXIM11	1.07E-20	0.9377116947	0.279	0.197	6.04E-16	5
NAMPT1	1.70E-20	0.508849553	0.612	0.546	9.61E-16	5
SRSF31	1.71E-20	0.5511573038	0.633	0.597	9.69E-16	5
FOXC11	5.79E-20	0.8749934871	0.328	0.246	3.28E-15	5
ARID5A1	7.11E-20	0.9319857192	0.348	0.269	4.03E-15	5
THUMPD3-AS11	1.08E-19	0.9836944802	0.286	0.206	6.10E-15	5
CXCL31	1.08E-19	1.328717701	0.214	0.135	6.11E-15	5
ARRDC31	1.43E-19	0.7739388951	0.447	0.372	8.09E-15	5
MIR22HG2	6.05E-19	0.9901833296	0.322	0.247	3.43E-14	5
CSF31	8.96E-19	0.9234420384	0.238	0.154	5.07E-14	5
AKAP122	9.23E-19	1.229710903	0.225	0.146	5.22E-14	5
HBEGF	1.08E-18	0.8361865918	0.332	0.252	6.11E-14	5
PRXL2A1	2.63E-18	1.322710266	0.132	0.072	1.49E-13	5
IER21	2.51E-17	0.5281417485	0.722	0.701	1.42E-12	5
BMP21	2.57E-17	1.376165745	0.19	0.122	1.45E-12	5
CDC42EP31	3.11E-17	0.5054698685	0.559	0.505	1.76E-12	5
DUSP21	3.62E-17	1.579897379	0.113	0.059	2.05E-12	5
CD551	1.52E-16	0.6359278262	0.478	0.418	8.61E-12	5
TOB1	2.52E-16	1.028761259	0.228	0.159	1.43E-11	5
EGR21	4.77E-16	1.696717766	0.104	0.055	2.70E-11	5
PIM12	1.09E-15	1.300884079	0.183	0.12	6.17E-11	5
KLHL211	1.30E-15	1.855335769	0.125	0.072	7.34E-11	5
RYBP1	1.80E-15	0.9940994031	0.268	0.202	1.02E-10	5
SNAI1	2.07E-15	0.8796256432	0.299	0.231	1.17E-10	5
NRARP1	3.17E-15	1.343009057	0.17	0.11	1.79E-10	5
LINC01578	4.08E-15	1.173601212	0.121	0.068	2.31E-10	5
PPP1R102	6.26E-15	0.7069223093	0.391	0.329	3.55E-10	5
CLEC2B	9.42E-15	0.5320904698	0.576	0.539	5.33E-10	5
SNHG121	1.20E-14	1.142886991	0.231	0.17	6.80E-10	5
SEPTIN71	1.77E-14	0.9128869457	0.149	0.089	1.00E-09	5
RALGDS1	1.83E-14	0.8254226743	0.382	0.329	1.04E-09	5
ADAMTS91	3.08E-14	0.6617814708	0.499	0.444	1.74E-09	5
NFE2L21	1.42E-13	0.5660481647	0.482	0.44	8.02E-09	5
DEDD21	1.48E-13	1.106814382	0.171	0.114	8.40E-09	5
ERF	1.57E-13	0.9745233034	0.278	0.219	8.92E-09	5
MRTFB1	1.80E-13	0.750134232	0.149	0.09	1.02E-08	5
MSX1	3.57E-13	1.110777606	0.175	0.118	2.02E-08	5
DDX3Y1	4.97E-13	0.8952456725	0.238	0.178	2.81E-08	5
PLAAT31	5.96E-13	1.20647334	0.105	0.06	3.37E-08	5
SNHG16	2.04E-12	1.176799873	0.115	0.069	1.15E-07	5
MRPL18	3.03E-12	0.8942674883	0.362	0.326	1.72E-07	5
CHORDC11	4.11E-12	0.8768762346	0.282	0.227	2.33E-07	5
GJA11	6.61E-12	0.6439459943	0.492	0.452	3.74E-07	5
CHIC21	6.95E-12	0.7501817445	0.37	0.325	3.93E-07	5
NOP531	7.84E-12	0.5150902673	0.307	0.236	4.44E-07	5
INTS6	1.37E-11	0.7318238381	0.302	0.249	7.77E-07	5
STX111	1.43E-11	1.510962545	0.118	0.073	8.07E-07	5
KCNQ1OT1	1.56E-11	0.8818832843	0.221	0.163	8.82E-07	5
BAZ1A1	1.93E-11	0.7422769756	0.41	0.372	1.09E-06	5
NSUN61	2.06E-11	1.068458609	0.204	0.151	1.17E-06	5
SERTAD21	2.19E-11	1.095308339	0.218	0.166	1.24E-06	5
ARID4B	2.30E-11	0.6070019431	0.436	0.405	1.30E-06	5
BCL31	2.43E-11	0.7178872269	0.353	0.305	1.37E-06	5
ITPKC1	2.55E-11	0.902309272	0.264	0.212	1.45E-06	5
IFRD11	2.67E-11	0.5498972338	0.356	0.303	1.51E-06	5
GEM1	3.15E-11	1.325581488	0.148	0.098	1.79E-06	5
KBTBD2	3.65E-11	0.7880305677	0.334	0.291	2.07E-06	5
SSH12	3.78E-11	0.898531458	0.287	0.235	2.14E-06	5
COL1A12	4.61E-11	0.8241733449	0.149	0.099	2.61E-06	5
KLF9	6.15E-11	0.5207295167	0.457	0.415	3.48E-06	5
PNRC21	6.83E-11	0.7001192386	0.381	0.345	3.87E-06	5
ZC3HAV11	7.21E-11	0.8006760079	0.344	0.302	4.08E-06	5
ABL2	1.00E-10	0.5727989385	0.455	0.417	5.69E-06	5
CITED22	1.06E-10	0.8250833398	0.297	0.247	6.00E-06	5
ATP6V0C1	1.68E-10	0.5699717647	0.405	0.359	9.49E-06	5
PFKFB31	2.04E-10	1.068631912	0.218	0.168	1.16E-05	5
RGS21	2.79E-10	1.162954017	0.151	0.103	1.58E-05	5
ANKRD371	4.55E-10	1.077469822	0.186	0.138	2.57E-05	5
LDLR1	6.97E-10	0.7504797735	0.325	0.28	3.95E-05	5
MAP2K32	8.06E-10	0.8535932019	0.275	0.231	4.57E-05	5
NFKBID1	1.43E-09	1.027475686	0.181	0.135	8.09E-05	5
RPL22L1	1.49E-09	0.561334999	0.414	0.384	8.46E-05	5
MAFG1	1.76E-09	0.8854530518	0.196	0.149	9.96E-05	5
NFIL31	1.88E-09	1.326804517	0.155	0.112	0.0001065858845	5
ZBTB101	2.11E-09	0.9743278849	0.223	0.177	0.0001195615023	5
KRT14	2.32E-09	0.7616191898	0.125	0.082	0.000131605832	5
COL1A2	2.36E-09	0.7378650377	0.132	0.088	0.0001335652429	5
CBX41	2.59E-09	1.130982131	0.164	0.12	0.0001467756058	5
CYTH11	2.71E-09	0.6228205012	0.405	0.375	0.0001534141028	5
ELOC1	3.10E-09	0.8626549758	0.214	0.166	0.0001756078249	5
LITAF1	4.21E-09	0.6235937144	0.391	0.349	0.000238434544	5
TSPYL2	4.49E-09	0.8049877904	0.204	0.156	0.0002541533592	5
FAM241A	5.01E-09	0.8395139777	0.183	0.136	0.0002838969691	5
RBBP6	5.15E-09	0.5410394958	0.374	0.339	0.0002913841166	5
KLF11	8.27E-09	0.9237395642	0.227	0.184	0.0004682217868	5
LINC-PINT1	8.84E-09	0.7597890882	0.285	0.243	0.0005006535687	5
ZNF5031	9.61E-09	1.053887591	0.157	0.113	0.0005441487683	5
SLC1A51	1.52E-08	0.7184366889	0.248	0.203	0.0008607106519	5
GPBP11	1.91E-08	0.5342332798	0.383	0.355	0.001084199484	5
PLIN21	4.62E-08	0.9857996782	0.314	0.28	0.00261868474	5
NEU1	6.10E-08	0.8190983686	0.278	0.243	0.00345440272	5
NFATC21	6.31E-08	0.9098544944	0.238	0.197	0.003572000937	5
TNFAIP21	7.11E-08	0.7390820055	0.291	0.251	0.004026628136	5
RNF19B1	1.02E-07	1.08122293	0.178	0.138	0.005750627762	5
ODC11	1.12E-07	0.7625470835	0.257	0.218	0.00632222579	5
MYLIP1	1.18E-07	0.5916402317	0.31	0.277	0.006698894988	5
FAM133B1	1.24E-07	0.5454080277	0.338	0.305	0.007044604205	5
TCP1	1.70E-07	0.5198423665	0.408	0.401	0.009615085974	5
SLC25A442	1.76E-07	1.219803289	0.146	0.11	0.009941007374	5
HMGA11	1.80E-07	1.244596541	0.152	0.115	0.01017886707	5
ING11	2.03E-07	1.029332142	0.147	0.109	0.01151966134	5
DNAJA4	2.32E-07	1.063169402	0.15	0.111	0.01312873698	5
CYP1B11	2.50E-07	0.6991429788	0.265	0.217	0.01418008939	5
MXD1	3.07E-07	0.8684265404	0.106	0.071	0.01736998923	5
PLK31	3.11E-07	0.7090997386	0.246	0.208	0.01763598839	5
EHD11	3.69E-07	1.014347302	0.207	0.17	0.02091256756	5
PCF111	3.76E-07	0.6614195218	0.283	0.248	0.02130099002	5
TOP11	4.87E-07	0.5176208709	0.425	0.411	0.02758517925	5
YME1L11	5.46E-07	0.5484667208	0.362	0.341	0.03089505507	5
RAB21	5.50E-07	0.8425463266	0.267	0.236	0.03115750431	5
BCL6	5.57E-07	1.264700286	0.104	0.071	0.03153036529	5
AHSA1	7.66E-07	0.8119110772	0.301	0.279	0.04339572907	5
THBS1	0	1.992678552	0.835	0.302	0	6
COL6A21	0	1.875452081	0.704	0.25	0	6
COTL1	0	1.693694113	0.877	0.465	0	6
THY11	0	2.176296143	0.515	0.111	0	6
COL4A11	0	1.536639216	0.952	0.562	0	6
COL4A21	0	1.542326529	0.968	0.59	0	6
LAMP3	0	2.364812528	0.411	0.08	0	6
S100A3	3.55E-291	2.329652303	0.34	0.064	2.01E-286	6
CTHRC1	4.41E-289	1.844745484	0.766	0.334	2.50E-284	6
COL15A1	1.06E-266	1.256166419	0.958	0.647	5.98E-262	6
PXDN	6.81E-264	1.685998814	0.656	0.251	3.86E-259	6
SERPINE12	1.26E-251	1.45647812	0.783	0.353	7.16E-247	6
P2RY61	3.60E-241	1.864157452	0.397	0.1	2.04E-236	6
LGALS11	8.61E-228	1.593284281	0.871	0.534	4.87E-223	6
LAMC1	1.74E-225	1.344232826	0.75	0.361	9.84E-221	6
ANGPTL21	4.32E-211	1.566081101	0.437	0.13	2.45E-206	6
MMP9	5.03E-207	2.59057623	0.157	0.019	2.85E-202	6
C4orf481	3.11E-202	1.186598325	0.657	0.266	1.76E-197	6
FSTL1	8.79E-199	1.123713236	0.835	0.474	4.98E-194	6
S100A6	1.08E-198	0.9544780732	0.999	0.924	6.13E-194	6
SVIL	1.27E-198	1.270680048	0.635	0.267	7.21E-194	6
DYSF	1.12E-191	1.198503207	0.525	0.187	6.33E-187	6
SPARC1	5.82E-191	0.7952348449	0.981	0.848	3.30E-186	6
MGP	8.86E-189	1.175645763	0.961	0.74	5.02E-184	6
COL18A12	4.12E-185	0.9822888043	0.842	0.459	2.33E-180	6
CYR61	3.93E-184	1.440049681	0.748	0.406	2.23E-179	6
MCAM1	2.78E-182	1.078565936	0.737	0.373	1.58E-177	6
COLGALT11	4.69E-182	1.34407619	0.448	0.148	2.66E-177	6
IL2RG	2.84E-181	2.27258999	0.231	0.046	1.61E-176	6
COL6A11	4.72E-181	1.428060477	0.489	0.174	2.67E-176	6
ITGAV	5.39E-179	1.288466333	0.597	0.249	3.05E-174	6
VWA11	9.49E-176	0.9648942253	0.862	0.49	5.37E-171	6
PFN11	1.40E-172	0.8488373848	0.963	0.802	7.94E-168	6
FBLIM1	1.19E-170	1.777876145	0.244	0.053	6.75E-166	6
MAP1B2	1.38E-166	1.000845487	0.536	0.205	7.84E-162	6
LAMA4	1.40E-163	1.011503656	0.69	0.328	7.92E-159	6
ZYX	2.51E-159	1.235687217	0.684	0.352	1.42E-154	6
CDH131	3.26E-159	0.9195298458	0.484	0.175	1.84E-154	6
RAI14	5.12E-155	0.9688618917	0.789	0.449	2.90E-150	6
ENO1	2.18E-154	0.8581537077	0.88	0.573	1.23E-149	6
CYBA2	1.01E-153	0.9743966712	0.589	0.253	5.71E-149	6
IGFBP7	2.63E-150	0.721371041	0.999	0.927	1.49E-145	6
AP2S11	2.70E-150	0.8975969786	0.837	0.523	1.53E-145	6
LAMB1	9.06E-147	0.9311931678	0.688	0.345	5.13E-142	6
SQLE1	2.01E-146	1.39735431	0.336	0.103	1.14E-141	6
HSPG22	8.52E-146	0.6781380536	0.978	0.804	4.82E-141	6
DPYSL3	1.15E-145	1.056834359	0.606	0.28	6.51E-141	6
RGS32	8.40E-145	1.15854693	0.508	0.209	4.75E-140	6
ANO9	2.77E-142	2.906465693	0.11	0.013	1.57E-137	6
RNF145	1.13E-140	0.9565092932	0.662	0.331	6.38E-136	6
MYO1B2	1.44E-140	1.043753303	0.424	0.154	8.15E-136	6
ITIH5	6.83E-140	1.285400183	0.296	0.085	3.87E-135	6
PRSS23	1.35E-139	0.7501627623	0.928	0.645	7.64E-135	6
FKBP1A	3.14E-139	0.6029671866	0.987	0.857	1.78E-134	6
RAB13	1.86E-138	0.7709927382	0.911	0.667	1.05E-133	6
CSTB	4.71E-136	0.8017095774	0.869	0.587	2.67E-131	6
DBI	1.18E-135	0.8312941325	0.822	0.509	6.66E-131	6
RBP5	2.02E-134	1.345854758	0.468	0.192	1.14E-129	6
FNDC4	1.79E-133	1.564308122	0.263	0.071	1.01E-128	6
S100A111	1.22E-130	0.6468877873	0.977	0.811	6.93E-126	6
QPCT	1.27E-129	1.454658495	0.289	0.086	7.20E-125	6
NRCAM	1.28E-129	2.161109967	0.135	0.022	7.25E-125	6
MAP1LC3A	2.33E-127	1.008741462	0.638	0.332	1.32E-122	6
FADS2	3.40E-126	1.805410552	0.147	0.026	1.92E-121	6
PRCP	6.02E-123	0.7291537079	0.945	0.694	3.41E-118	6
CFL1	7.79E-123	0.5699316436	0.966	0.836	4.41E-118	6
PDGFB1	8.88E-123	0.950465645	0.385	0.141	5.03E-118	6
APLN	1.82E-122	1.824625073	0.182	0.04	1.03E-117	6
PLOD11	2.28E-122	1.052968422	0.433	0.172	1.29E-117	6
PDLIM4	4.69E-122	1.118472884	0.548	0.26	2.65E-117	6
SAMD4A1	1.36E-120	1.353654655	0.354	0.127	7.69E-116	6
GADD45GIP1	1.46E-119	0.722117577	0.771	0.455	8.25E-115	6
EIF4EBP1	4.80E-119	1.036964925	0.42	0.167	2.72E-114	6
RASGRP3	7.72E-119	0.7961763163	0.478	0.2	4.37E-114	6
ITGA5	1.15E-118	0.7801203509	0.785	0.48	6.50E-114	6
SH3TC1	1.82E-118	1.095143482	0.399	0.151	1.03E-113	6
PGF1	3.07E-118	1.13834952	0.33	0.113	1.74E-113	6
TSPAN151	1.76E-117	1.069144464	0.405	0.16	9.95E-113	6
COL27A1	2.10E-117	1.864571244	0.113	0.017	1.19E-112	6
AEBP11	1.86E-115	1.026128959	0.326	0.11	1.05E-110	6
EXT1	3.57E-115	1.321415406	0.293	0.095	2.02E-110	6
BACE21	3.68E-115	0.7788575105	0.786	0.465	2.09E-110	6
SH3BGRL3	1.73E-112	0.6019764186	0.962	0.777	9.78E-108	6
CD276	1.14E-111	1.217669311	0.277	0.087	6.48E-107	6
CSF2RB	2.41E-111	1.03797271	0.583	0.292	1.37E-106	6
PLAU	5.24E-111	1.610114078	0.246	0.073	2.97E-106	6
CHCHD101	5.46E-110	1.140855064	0.323	0.113	3.09E-105	6
FAM213B	1.09E-109	1.494010296	0.26	0.08	6.16E-105	6
P4HB	5.22E-109	0.7405378759	0.775	0.483	2.96E-104	6
LAPTM4B	4.08E-108	0.8735483835	0.577	0.292	2.31E-103	6
ANGPT21	8.12E-108	0.7531864889	0.476	0.207	4.60E-103	6
SEC61B	3.28E-107	0.6248161616	0.868	0.612	1.86E-102	6
ATP1B3	6.31E-107	0.7547881818	0.775	0.477	3.57E-102	6
SEC61G1	1.66E-106	0.7702137034	0.82	0.546	9.41E-102	6
TYMP	2.97E-106	0.7220588493	0.649	0.34	1.68E-101	6
C16orf74	1.81E-105	1.662886057	0.117	0.02	1.02E-100	6
ACOT71	8.93E-105	0.9947145301	0.304	0.105	5.06E-100	6
PDLIM11	2.86E-104	0.5917705215	0.968	0.739	1.62E-99	6
HSPA5	5.47E-104	0.727629476	0.821	0.528	3.10E-99	6
SRM	9.42E-104	0.9372930905	0.424	0.181	5.33E-99	6
KIAA1147	5.24E-103	1.128406587	0.229	0.067	2.97E-98	6
SELENOM	1.75E-102	1.504333525	0.419	0.194	9.91E-98	6
TMED3	5.78E-102	1.097936046	0.358	0.139	3.27E-97	6
CD93	5.84E-102	0.6424989691	0.9	0.648	3.31E-97	6
CRIM1	6.29E-102	0.8083212153	0.717	0.424	3.56E-97	6
MATN2	1.73E-101	0.8985763614	0.58	0.305	9.80E-97	6
FAM198B	2.06E-101	0.8334332734	0.661	0.374	1.16E-96	6
TNFRSF4	7.47E-101	0.8043452061	0.251	0.077	4.23E-96	6
PKIG1	9.30E-101	0.7518505882	0.609	0.323	5.27E-96	6
GALNT1	1.19E-100	0.9188362457	0.427	0.184	6.75E-96	6
G0S22	1.38E-100	0.9294530175	0.321	0.117	7.81E-96	6
ATOX1	1.45E-100	0.6220566117	0.836	0.555	8.21E-96	6
PLEKHO1	4.23E-100	0.957187323	0.452	0.202	2.40E-95	6
CMTM7	1.53E-99	1.13193412	0.259	0.083	8.67E-95	6
GPR41	2.12E-99	0.8814001132	0.396	0.164	1.20E-94	6
LXN1	2.60E-99	0.9962977613	0.418	0.181	1.47E-94	6
CTSS	9.23E-99	0.9213889033	0.534	0.266	5.23E-94	6
PRDX6	1.78E-98	0.720531016	0.78	0.521	1.01E-93	6
POMP1	1.98E-98	0.6223393927	0.882	0.63	1.12E-93	6
LCP2	6.40E-98	1.281193383	0.22	0.065	3.63E-93	6
TXNDC17	6.76E-98	0.7375230567	0.652	0.368	3.83E-93	6
TNIP1	1.85E-97	0.9802769781	0.506	0.251	1.05E-92	6
NME11	4.15E-97	0.9436906309	0.477	0.226	2.35E-92	6
LAMC2	1.33E-96	2.09582084	0.161	0.039	7.54E-92	6
UQCC21	6.84E-96	0.7874267914	0.403	0.17	3.87E-91	6
CALU	1.74E-95	0.7123434532	0.607	0.33	9.84E-91	6
RALA1	4.71E-95	0.8240708372	0.528	0.264	2.67E-90	6
NME41	1.37E-94	0.8362757583	0.484	0.23	7.75E-90	6
ACTB	1.57E-94	0.5233907119	0.997	0.944	8.89E-90	6
S100A13	4.15E-94	0.6088112931	0.9	0.651	2.35E-89	6
ACTG1	5.70E-94	0.551887737	0.994	0.886	3.23E-89	6
TBC1D11	7.49E-94	0.7512912971	0.417	0.181	4.24E-89	6
CLTC	9.13E-94	0.7271148309	0.565	0.292	5.17E-89	6
MSN	1.48E-93	0.6106426254	0.883	0.63	8.39E-89	6
A1BG	3.00E-93	1.521429473	0.167	0.042	1.70E-88	6
GRN	3.34E-93	0.6212836509	0.86	0.59	1.89E-88	6
FLNA	8.41E-93	0.6582071885	0.748	0.467	4.76E-88	6
TWF2	3.08E-92	0.8452193263	0.504	0.246	1.74E-87	6
HSP90B1	3.90E-92	0.5793932671	0.914	0.679	2.21E-87	6
LBH1	6.38E-92	0.7904555192	0.475	0.225	3.61E-87	6
PSME2	7.07E-92	0.6545881315	0.776	0.493	4.00E-87	6
ANXA2	8.54E-92	0.5444682703	0.97	0.806	4.84E-87	6
NDUFS61	1.02E-91	0.6009619769	0.717	0.421	5.78E-87	6
MYL91	1.59E-91	0.9622737754	0.516	0.262	9.03E-87	6
NDST1	3.03E-91	0.8252016094	0.458	0.217	1.71E-86	6
PGAM1	1.12E-90	0.7281280577	0.683	0.418	6.36E-86	6
ACVRL1	1.53E-90	0.6810391222	0.659	0.372	8.66E-86	6
TRIM47	2.59E-90	0.7543835427	0.491	0.236	1.47E-85	6
TGFB1I1	3.63E-90	0.8862209824	0.464	0.221	2.06E-85	6
ARHGDIB	5.61E-90	0.6014941648	0.82	0.544	3.18E-85	6
GGH	9.85E-90	1.585955894	0.171	0.045	5.58E-85	6
DAPK31	1.95E-89	0.8562066108	0.425	0.193	1.11E-84	6
CD63	2.79E-89	0.5365216016	0.967	0.832	1.58E-84	6
UQCR111	7.36E-89	0.5638592145	0.824	0.56	4.17E-84	6
JAK1	8.26E-89	0.6256366003	0.78	0.512	4.67E-84	6
RASSF2	1.11E-88	1.351399004	0.162	0.041	6.30E-84	6
MLEC	1.93E-88	0.556072288	0.537	0.267	1.09E-83	6
PKM	2.12E-88	0.6181919316	0.839	0.577	1.20E-83	6
MSANTD3	3.05E-88	1.293966827	0.201	0.059	1.73E-83	6
MZT2A	3.24E-88	0.7946702035	0.487	0.241	1.84E-83	6
SAMD14	3.57E-88	1.570218413	0.161	0.041	2.02E-83	6
FADS1	3.95E-88	1.258063842	0.195	0.056	2.23E-83	6
NDUFB21	5.33E-88	0.5214341164	0.856	0.588	3.02E-83	6
MYDGF	7.02E-88	0.7371392917	0.65	0.388	3.97E-83	6
LDHB	1.68E-87	0.6619729104	0.719	0.448	9.49E-83	6
VWF	2.16E-87	0.5411795687	0.981	0.837	1.22E-82	6
C1orf54	2.41E-87	0.5762427302	0.658	0.371	1.36E-82	6
EPS8L1	2.97E-87	1.344396897	0.196	0.057	1.68E-82	6
ACTR3	4.03E-87	0.6679133771	0.688	0.417	2.28E-82	6
MIR4435-2HG	5.87E-87	0.7536284767	0.372	0.158	3.33E-82	6
CALR	8.55E-87	0.5860641754	0.9	0.669	4.84E-82	6
LAMA51	9.51E-87	0.7259857525	0.597	0.328	5.38E-82	6
MRPL411	1.12E-86	0.5970941619	0.632	0.355	6.31E-82	6
CTSB	1.71E-86	0.6210385775	0.777	0.492	9.70E-82	6
SSR3	2.00E-86	0.6497126067	0.641	0.369	1.13E-81	6
ADAMTS7	2.73E-86	1.197818034	0.195	0.057	1.55E-81	6
CD99	5.63E-86	0.6160355009	0.911	0.732	3.19E-81	6
PARK7	1.04E-85	0.5602036871	0.818	0.561	5.87E-81	6
PHLDB2	1.13E-85	0.8463671825	0.386	0.169	6.41E-81	6
SFRP1	5.15E-85	1.542894963	0.165	0.044	2.91E-80	6
MSMO1	5.20E-85	1.406586008	0.253	0.09	2.95E-80	6
IL34	6.60E-85	1.866485469	0.128	0.028	3.74E-80	6
EIF5A	8.86E-85	0.6324079731	0.74	0.463	5.02E-80	6
MBOAT7	4.49E-84	1.017480943	0.315	0.125	2.54E-79	6
TMED10	7.06E-84	0.5904725573	0.68	0.399	4.00E-79	6
RABAC1	9.10E-84	0.5129833159	0.888	0.632	5.15E-79	6
TIMM8B1	3.37E-83	0.6085408184	0.574	0.306	1.91E-78	6
SERPINH1	7.42E-83	0.5941131373	0.839	0.583	4.20E-78	6
CLTB	6.87E-82	0.6667949683	0.653	0.388	3.89E-77	6
RFLNB	7.16E-82	1.243649493	0.191	0.058	4.06E-77	6
PRELID11	8.87E-82	0.5573443627	0.722	0.449	5.02E-77	6
ECE1	1.21E-81	0.5394927933	0.786	0.507	6.83E-77	6
ROBO1	2.84E-81	0.9116846731	0.382	0.171	1.61E-76	6
MYADM1	4.61E-81	0.6900636437	0.622	0.352	2.61E-76	6
SDF2L11	5.75E-81	0.6975359205	0.447	0.214	3.25E-76	6
F3	1.24E-80	1.567749821	0.169	0.047	7.02E-76	6
CCDC28B	1.55E-80	1.157317929	0.217	0.071	8.77E-76	6
NDUFB11	1.81E-80	0.5244107553	0.778	0.504	1.02E-75	6
PMEPA1	3.30E-80	0.7935268016	0.365	0.159	1.87E-75	6
ABRACL	5.40E-80	0.8083111157	0.468	0.235	3.06E-75	6
LTBP1	7.16E-80	1.055882124	0.256	0.093	4.05E-75	6
CASP9	9.21E-80	1.733712209	0.124	0.028	5.21E-75	6
PTPRK1	1.09E-79	0.6479532086	0.539	0.286	6.17E-75	6
TP53I3	1.21E-79	0.8638977614	0.379	0.171	6.87E-75	6
KDELR2	2.21E-79	0.5887269383	0.69	0.422	1.25E-74	6
TIMM131	2.44E-79	0.6608497811	0.604	0.348	1.38E-74	6
ANXA6	2.45E-79	0.936980646	0.391	0.18	1.39E-74	6
TRAPPC1	4.41E-79	0.5612683048	0.665	0.4	2.50E-74	6
TM4SF18	9.49E-79	0.5036035316	0.599	0.331	5.37E-74	6
PMP22	1.39E-78	0.6393062156	0.77	0.498	7.87E-74	6
FAM43A1	1.60E-78	0.7873604583	0.466	0.236	9.05E-74	6
MYO10	3.29E-78	0.6515869295	0.401	0.184	1.86E-73	6
CTSZ	7.23E-78	0.7016373596	0.507	0.265	4.09E-73	6
FKBP10	8.69E-78	0.7259454242	0.459	0.227	4.92E-73	6
RNF7	2.12E-77	0.5759736992	0.706	0.447	1.20E-72	6
TNFRSF21	2.45E-77	1.814550294	0.111	0.024	1.39E-72	6
TPM4	3.66E-77	0.5608874781	0.918	0.692	2.07E-72	6
ICAM2	4.28E-77	0.5945416383	0.702	0.436	2.42E-72	6
COL5A2	7.24E-77	1.15235596	0.208	0.068	4.10E-72	6
TMED9	1.07E-76	0.5728177245	0.69	0.429	6.09E-72	6
CREB3L2	1.16E-76	0.7270320764	0.359	0.157	6.58E-72	6
RHOB1	1.47E-76	0.6987740603	0.83	0.589	8.32E-72	6
APRT	2.18E-76	0.5695275027	0.745	0.478	1.23E-71	6
PPIB	5.86E-76	0.5517413246	0.905	0.701	3.32E-71	6
[truncated: 6,167 more rows]
